# Supplementary material
Source: publisher figshare collection journal article supplement (https://gsajournals.figshare.com/ndownloader/files/20187288)
Supplement: Supplementary file 1 [file 20187288]

## Sheet: Overview
	Total	Up-regulated	Down-regulated	In Koncz list
hgf1-1	6088	4758	1330	39
hgf1-8	2206	838	1368	9
coilin_Share	769	334	435	1

## Sheet: hgf1-1
Gene ID	logFC	logCPM	PValue	FDR	Direction of change	Koncz Category	has SNP/indels?	SNPs/indels
AT1G01020	0.649949	3.66158	4.82447e-05	0.000643349	UP		NO
AT1G01046	5.31865	-2.93459	0.000192149	0.0020578	UP		NO
AT1G01050	0.329998	5.91236	0.00313538	0.020304	UP		NO
AT1G01100	0.381836	7.10124	0.00479392	0.0285777	UP		NO
AT1G01120	-0.640669	5.56418	1.86473e-05	0.000286002	DOWN		NO
AT1G01200	1.12584	-0.0109233	0.000707792	0.00599274	UP		NO
AT1G01220	0.437106	4.87408	0.000259078	0.00264024	UP		NO
AT1G01260	0.48874	4.1364	0.000283506	0.00283734	UP		NO
AT1G01340	1.3578	1.12232	1.92431e-06	4.09689e-05	UP		NO
AT1G01390	0.665414	2.55851	0.00253845	0.0171166	UP		NO
AT1G01430	-0.618039	6.58854	1.57771e-09	7.00117e-08	DOWN		NO
AT1G01448	0.535893	4.69945	8.87007e-05	0.00105866	UP		NO
AT1G01453	1.50122	0.300329	0.00110076	0.00867528	UP		NO
AT1G01480	2.18807	-0.745358	1.78764e-05	0.000276064	UP		YES	1:176479:G-GTTTTTTTTTTTTTTTTTTTTTTTTTTTTTTTTTTTTTTTTTTTTTTTTTTTTTTTTTTTTTTTTTTTT;intronic_variant
AT1G01490	0.337657	6.34016	0.00119071	0.0092448	UP		NO
AT1G01500	-0.492208	4.35763	0.000273376	0.00275759	DOWN		NO
AT1G01560	2.56361	0.468558	2.32035e-08	7.95841e-07	UP		NO
AT1G01600	1.29403	2.38296	3.21245e-07	8.41358e-06	UP		NO
AT1G01610	-0.401276	5.80518	0.000163149	0.00178562	DOWN		NO
AT1G01620	-0.826388	8.57115	8.56623e-13	7.07155e-11	DOWN		NO
AT1G01650	0.31495	5.46835	0.00634933	0.0357492	UP		NO
AT1G01680	4.75526	-0.446546	1.3453e-08	4.86666e-07	UP		NO
AT1G01750	1.69557	2.93058	5.76787e-06	0.000106099	UP		NO
AT1G01770	0.73592	5.58904	3.36794e-10	1.7058e-08	UP		NO
AT1G01780	0.735679	4.43645	1.61045e-06	3.51761e-05	UP		NO
AT1G01830	0.363496	4.84815	0.0027791	0.0184186	UP		NO
AT1G01920	1.0328	4.52535	1.04842e-08	3.90187e-07	UP		NO
AT1G02100	0.326812	5.5835	0.00462596	0.0278127	UP		NO
AT1G02145	0.656089	4.94233	3.89076e-07	9.95781e-06	UP		NO
AT1G02220	2.18425	3.1958	7.38075e-21	1.6463e-18	UP		NO
AT1G02230	3.65717	-0.59336	6.0272e-11	3.62504e-09	UP		NO
AT1G02260	0.469545	4.3254	0.000362507	0.00349045	UP		NO
AT1G02310	2.35552	0.0180467	2.97493e-07	7.87106e-06	UP		NO
AT1G02360	0.928328	3.44334	0.000235791	0.00243905	UP		NO
AT1G02370	0.992615	2.57391	1.37977e-05	0.000222995	UP		NO
AT1G02380	-1.31402	3.07212	1.20061e-08	4.40018e-07	DOWN		NO
AT1G02410	0.359838	4.57466	0.00487483	0.0289524	UP		YES	1:491118:A-AT;intronic_variant,1:491118:A-AT;exonic_variant,1:491118:A-AT;splice_donor_region_variant
AT1G02450	6.63169	-2.33625	2.43133e-05	0.00035791	UP		NO
AT1G02470	1.02308	1.15904	0.00884831	0.0465656	UP		NO
AT1G02520	0.807647	2.28319	0.00130552	0.00998665	UP		NO
AT1G02530	1.95024	-1.93609	0.00434001	0.0264061	UP		NO
AT1G02575	2.34548	-2.36243	0.00206723	0.0145358	UP		NO
AT1G02610	-0.724094	4.51698	0.000199479	0.00212244	DOWN		NO
AT1G02620	-2.1764	1.02765	4.98674e-08	1.58451e-06	DOWN		NO
AT1G02640	-1.32001	4.55026	1.71633e-18	2.9645e-16	DOWN		NO
AT1G02660	-0.88537	4.94633	3.05994e-10	1.57106e-08	DOWN		NO
AT1G02670	1.05156	1.02009	0.000283174	0.00283519	UP		YES	1:579239:G-A;protein_coding;missense;GGA>GAA;G>E
AT1G02750	0.466251	3.84329	0.00118581	0.00921963	UP		NO
AT1G02820	-0.851797	4.06649	0.000164213	0.00179574	DOWN		NO
AT1G02850	-0.757279	5.90117	8.18977e-06	0.000143891	DOWN		NO
AT1G02890	0.972446	7.18383	1.11303e-23	3.09819e-21	UP		NO
AT1G02910	-0.6935	5.5857	7.16122e-09	2.75969e-07	DOWN		NO
AT1G02920	3.61845	5.81691	3.18988e-38	2.19262e-35	UP		NO
AT1G02930	3.34738	5.68314	1.72467e-28	6.99865e-26	UP		NO
AT1G02960	0.356838	4.82774	0.00481845	0.0286958	UP		NO
AT1G03010	0.637082	1.63434	0.00482166	0.0287024	UP		YES	1:695075:G-A;protein_coding;missense;GAT>AAT;D>N,1:695075:G-A;exonic_variant
AT1G03060	0.296272	6.18721	0.00603199	0.034353	UP		NO
AT1G03090	-0.988548	6.72264	2.76382e-12	2.11564e-10	DOWN		NO
AT1G03100	0.760155	1.77531	0.00274356	0.0182332	UP		NO
AT1G03110	0.906278	3.27681	3.12051e-06	6.25607e-05	UP		NO
AT1G03160	-0.374485	5.94362	0.000412392	0.00387225	DOWN		NO
AT1G03165	-1.84849	-1.74795	0.00350793	0.0221879	DOWN		NO
AT1G03300	-0.766748	2.62167	0.00056605	0.00500923	DOWN		NO
AT1G03310	-0.323997	6.3363	0.00223339	0.0154652	DOWN		NO
AT1G03360	0.541778	2.98536	0.00452364	0.0273211	UP		NO
AT1G03495	2.56329	-1.59203	0.00801644	0.0431249	UP		YES	1:874461:G-GA;exonic_variant&protein_coding
AT1G03580	-0.661975	2.09542	0.00944684	0.0490854	DOWN		NO
AT1G03600	-0.298822	8.73857	0.00320862	0.0206752	DOWN		NO
AT1G03660	0.797514	0.599204	0.00653797	0.0366459	UP		YES	1:911789:T-TA;exonic_variant
AT1G03680	-0.408121	7.91854	0.000111546	0.00128796	DOWN		YES	1:917305:T-TGTAGCAGTGTCCTGAGCTTCACAGATAACGCCTCGTCGTAATCGG;intronic_variant&splice_acceptor_region_variant&splice_acceptor_variant,1:917303:A-ATTC;splice_acceptor_region_variant&splice_acceptor_variant
AT1G03740	0.483805	5.48621	0.00346752	0.0219984	UP		NO
AT1G03760	0.67739	3.07023	0.00170884	0.012466	UP		NO
AT1G03770	0.668411	3.01844	0.000648033	0.00556229	UP		NO
AT1G03790	-1.51524	2.95778	1.97601e-11	1.29735e-09	DOWN		NO
AT1G03820	0.830333	2.1543	0.00151188	0.0112859	UP		NO
AT1G03830	0.541433	3.32906	0.00453578	0.0273781	UP		NO
AT1G03860	0.461135	5.78964	6.08697e-05	0.000775985	UP		NO
AT1G03870	-0.60033	6.14284	0.000342361	0.00332403	DOWN		NO
AT1G03900	0.299376	6.16656	0.00783503	0.0424059	UP		NO
AT1G03905	0.706512	1.8195	0.00106583	0.00844792	UP		YES	1:993592:G-A;protein_coding;missense;GCT>ACT;A>T
AT1G03920	0.910613	1.44557	4.07277e-05	0.000556716	UP		NO
AT1G03940	2.6565	-0.690977	2.40943e-05	0.000355307	UP		NO
AT1G03980	2.56001	-1.21654	1.8884e-06	4.0383e-05	UP		NO
AT1G04040	1.06276	5.87334	1.42611e-12	1.14637e-10	UP		NO
AT1G04070	0.585816	2.62136	0.00166989	0.0122189	UP		NO
AT1G04120	0.45832	6.5241	6.43069e-06	0.000116573	UP		NO
AT1G04130	0.700892	3.71174	3.97728e-06	7.65478e-05	UP		NO
AT1G04160	0.549002	3.48894	0.00260393	0.0174395	UP		NO
AT1G04170	0.292408	6.2092	0.00760094	0.0414226	UP		NO
AT1G04180	1.42802	-0.360112	0.000212537	0.00223353	UP		NO
AT1G04190	0.339657	4.63268	0.00539723	0.0314071	UP		NO
AT1G04200	0.453342	4.76354	0.000159834	0.00175526	UP		NO
AT1G04240	-0.843659	4.97922	3.89944e-10	1.95733e-08	DOWN		NO
AT1G04250	0.687296	5.54889	1.05276e-08	3.90938e-07	UP		NO
AT1G04270	0.38134	7.77897	0.00162003	0.0119413	UP		NO
AT1G04330	-0.943584	1.12813	0.00110321	0.00868366	DOWN		NO
AT1G04390	0.388905	4.29341	0.00413771	0.025394	UP		NO
AT1G04420	-0.723402	6.73504	1.48046e-11	9.85442e-10	DOWN		NO
AT1G04425	1.6139	1.9188	3.084e-07	8.13407e-06	UP		NO
AT1G04480	0.392878	6.49133	0.00124082	0.00956343	UP		NO
AT1G04540	3.08936	-2.93498	0.00730285	0.0401448	UP		NO
AT1G04600	0.953049	-0.616032	0.0094827	0.0492197	UP		NO
AT1G04680	0.450463	5.33074	0.000734835	0.0061875	UP		NO
AT1G04690	-0.288873	6.79478	0.00448517	0.0271212	DOWN		NO
AT1G04700	0.902676	2.09057	0.00142796	0.0107665	UP		NO
AT1G04730	1.24876	2.85447	1.80332e-07	4.99488e-06	UP		NO
AT1G04778	1.43112	-1.80601	0.00625646	0.0353386	UP		NO
AT1G04800	0.557684	6.06129	0.00118507	0.00921598	UP		NO
AT1G04820	0.419446	8.36993	0.00107062	0.00847858	UP		NO
AT1G04900	1.00658	3.41542	4.88013e-07	1.20948e-05	UP		NO
AT1G04980	0.570764	3.42811	0.000598746	0.00522039	UP		NO
AT1G04985	0.330983	5.0695	0.00578652	0.0332077	UP		NO
AT1G04990	0.530965	4.39527	6.63034e-05	0.000829865	UP		NO
AT1G05000	1.36774	3.89741	3.6139e-08	1.19216e-06	UP		NO
AT1G05030	-1.08216	3.55037	1.99184e-12	1.54936e-10	DOWN		NO
AT1G05135	0.929992	2.56573	0.00420917	0.0257481	UP		NO
AT1G05170	0.660914	4.6142	5.40838e-07	1.32576e-05	UP		NO
AT1G05200	0.302702	5.87825	0.00350889	0.0221898	UP		NO
AT1G05205	0.640481	3.3095	0.000290854	0.00289659	UP		NO
AT1G05220	1.37253	-0.669904	0.000572082	0.00504904	UP		NO
AT1G05250	1.86194	4.89927	3.10896e-07	8.19351e-06	UP		NO
AT1G05260	1.09932	5.22119	1.99971e-09	8.62385e-08	UP		NO
AT1G05280	0.920365	1.09656	0.000927692	0.00752181	UP		NO
AT1G05310	0.714436	2.75975	0.00122634	0.00947339	UP		NO
AT1G05320	0.654957	5.54483	5.71022e-09	2.27067e-07	UP		NO
AT1G05340	-0.873998	3.80934	3.13568e-07	8.24456e-06	DOWN		NO
AT1G05360	0.492784	4.65126	0.00112349	0.00882881	UP		NO
AT1G05530	1.00434	0.0885783	0.00202175	0.0142867	UP		NO
AT1G05540	1.30514	0.170459	5.89969e-05	0.000757269	UP		NO
AT1G05570	0.343584	5.89922	0.00327611	0.0210577	UP		NO
AT1G05575	2.1146	0.988763	5.05168e-08	1.60062e-06	UP		NO
AT1G05610	1.78372	-0.166975	0.000498937	0.00451133	UP		NO
AT1G05620	0.573591	3.77064	0.000502026	0.00453062	UP		NO
AT1G05650	2.35322	-2.26013	0.00348981	0.0221025	UP		YES	1:1691482:CT-C;intronic_variant
AT1G05660	0.865519	1.33804	0.000574439	0.00506218	UP		NO
AT1G05675	3.25455	-0.158636	4.76928e-10	2.35189e-08	UP		NO
AT1G05720	0.56905	4.16715	7.24271e-05	0.000893559	UP		NO
AT1G05780	0.591745	2.64139	0.00214678	0.0149888	UP		NO
AT1G05785	0.508781	2.74724	0.00393678	0.0244775	UP		NO
AT1G05810	0.540024	2.94576	0.00753238	0.0411408	UP		NO
AT1G05880	6.11912	-2.62023	5.9824e-05	0.000766134	UP		NO
AT1G06000	0.749321	3.87976	8.80673e-06	0.000153371	UP		NO
AT1G06100	0.947831	1.65236	0.0012221	0.00944725	UP		NO
AT1G06160	1.57339	1.97213	0.00128329	0.00985019	UP		NO
AT1G06330	1.80251	-1.95337	0.00388041	0.0241716	UP		NO
AT1G06360	-0.51079	5.06622	0.00207709	0.0145959	DOWN		NO
AT1G06460	-0.627132	6.53735	1.21411e-07	3.53741e-06	DOWN		NO
AT1G06515	0.431605	4.0511	0.0035907	0.0226392	UP		NO
AT1G06550	0.411272	5.32644	0.000452459	0.00416033	UP		NO
AT1G06570	-0.483512	7.17309	1.57114e-05	0.000248672	DOWN		NO
AT1G06620	1.7837	3.1511	9.92923e-08	2.95953e-06	UP		NO
AT1G06630	0.344515	4.35923	0.00643909	0.0362002	UP		NO
AT1G06640	0.791824	6.05492	1.74124e-11	1.14769e-09	UP		NO
AT1G06645	-0.390249	4.6999	0.00261482	0.0174846	DOWN		NO
AT1G06680	-0.273684	11.8086	0.00569833	0.0328078	DOWN		YES	1:2048526:TCAGGTCTTTGCTTTACTCCATCATCTGTAAAGGTATTGATGTTACAAAATCTAATGAAGTGTGAGACTGAGTGGTGATTTGGGCTTTATG-T;intronic_variant&splice_donor_region_variant&splice_acceptor_region_variant&exonic_variant&splice_donor_variant,1:2048526:TCAGGTCTTTGCTTTACTCCATCATCTGTAAAGGTATTGATGTTACAAAATCTAATGAAGTGTGAGACTGAGTGGTGATTTGGGCTTTATG-T;intronic_variant&splice_donor_region_variant&splice_acceptor_region_variant&exo…
AT1G06690	-0.449102	5.60879	7.66742e-05	0.000937713	DOWN		NO
AT1G06710	0.803461	2.94907	4.37456e-05	0.000591083	UP		NO
AT1G06720	0.649804	4.65501	1.10103e-05	0.000184864	UP		NO
AT1G06760	0.542573	7.47176	0.000614995	0.00532347	UP		NO
AT1G06780	0.345923	4.28214	0.00882055	0.046434	UP		NO
AT1G06830	1.55713	0.491887	9.69485e-07	2.24113e-05	UP		NO
AT1G06850	0.703376	2.87119	0.000165446	0.00180687	UP		NO
AT1G06890	0.830681	5.79689	1.44188e-13	1.34527e-11	UP		NO
AT1G06923	1.65138	0.258715	1.85021e-05	0.000284422	UP		NO
AT1G07000	1.10505	3.39678	2.01587e-06	4.26485e-05	UP		NO
AT1G07010	-0.485937	6.55924	6.23927e-05	0.000790613	DOWN		NO
AT1G07070	0.524147	3.22873	0.00631498	0.0356094	UP		NO
AT1G07090	1.18887	2.23377	1.54568e-07	4.36014e-06	UP		NO
AT1G07110	-0.332028	7.18635	0.000701379	0.00595341	DOWN		NO
AT1G07210	0.589205	4.84047	5.00486e-06	9.38056e-05	UP		NO
AT1G07240	0.559958	3.77194	0.00051288	0.00460894	UP		NO
AT1G07250	-0.400182	5.68411	0.000508876	0.00457663	DOWN		NO
AT1G07260	1.19394	1.48236	1.38334e-06	3.07336e-05	UP		NO
AT1G07290	0.904207	1.32505	0.000253875	0.00259428	UP		YES	1:2243386:T-TG;exonic_variant&protein_coding,1:2243386:T-TG;exonic_variant
AT1G07370	0.588764	3.01343	0.00565969	0.0326188	UP		NO
AT1G07380	0.412641	4.45853	0.00161338	0.0119037	UP		NO
AT1G07440	-0.414637	6.01655	8.69299e-05	0.00104158	DOWN		NO
AT1G07550	-3.38426	-1.4123	1.16051e-05	0.00019287	DOWN		NO
AT1G07615	0.643471	3.20062	0.00446669	0.0270386	UP		NO
AT1G07620	2.53067	1.59805	9.68663e-13	7.95745e-11	UP		NO
AT1G07650	0.394171	5.89807	0.000430466	0.00400337	UP		NO
AT1G07710	2.11536	-1.39131	2.83234e-05	0.000406633	UP		NO
AT1G07780	0.661846	3.84972	7.22894e-05	0.000892514	UP		NO
AT1G07830	0.540745	3.78214	0.00158851	0.0117485	UP		NO
AT1G07960	0.616811	4.85085	1.07791e-06	2.45969e-05	UP		NO
AT1G08050	0.808338	1.50989	0.00160586	0.0118585	UP		NO
AT1G08165	2.42363	-0.280906	4.74368e-06	8.96588e-05	UP		NO
AT1G08290	0.791567	0.763571	0.0063024	0.0355504	UP		NO
AT1G08300	0.70537	2.35397	0.00765918	0.0416751	UP		NO
AT1G08310	3.01059	3.04872	2.16222e-12	1.66649e-10	UP		NO
AT1G08320	0.512463	3.11826	0.0053067	0.0309981	UP		NO
AT1G08340	0.743958	2.27849	0.00753835	0.0411639	UP		NO
AT1G08350	0.482813	3.62394	0.00279175	0.0184805	UP		NO
AT1G08360	0.47502	7.59334	3.84422e-05	0.000530426	UP		YES	1:2636468:G-A;intronic_variant
AT1G08380	-0.276565	10.7447	0.00758755	0.0413683	DOWN		YES	1:2641564:GCTAAAAAACATACGAGAAATCACAAATCAAGATTATCATATGCATATATATGTTTGATTGAAATTATTCGAAAAGAGAAAGAGAGAAAAAGAGTAC-G;intronic_variant&splice_acceptor_region_variant&splice_donor_region_variant&splice_acceptor_variant&splice_donor_variant
AT1G08400	0.467609	3.16903	0.00768213	0.0417797	UP		NO
AT1G08450	0.367401	5.75138	0.000403484	0.00380985	UP		NO
AT1G08580	0.52131	3.92922	0.000310668	0.00306312	UP		NO
AT1G08590	0.703303	2.8093	0.000355133	0.00342719	UP		NO
AT1G08610	0.65226	2.4411	0.00852965	0.0452404	UP		NO
AT1G08630	-1.35364	3.68481	4.54426e-07	1.1422e-05	DOWN		NO
AT1G08650	1.30261	5.11182	2.14342e-10	1.14087e-08	UP		NO
AT1G08670	1.00604	0.96999	0.00144921	0.0108928	UP		NO
AT1G08680	-1.11165	5.34766	8.20261e-23	2.12517e-20	DOWN		YES	1:2766130:G-A;protein_coding;stop-gain;TGG>TGA;W>*,1:2766130:G-A;exonic_variant
AT1G08750	0.404872	3.76137	0.00797362	0.0429489	UP		NO
AT1G08830	-0.80957	6.80851	1.84233e-06	3.95484e-05	DOWN		NO
AT1G08910	0.463802	4.98756	0.000285199	0.00284785	UP		YES	1:2859036:A-AC;exonic_variant,1:2859036:A-AC;exonic_variant&protein_coding
AT1G08980	-0.464519	6.22368	4.61403e-05	0.000618662	DOWN		NO
AT1G08990	0.818188	2.7446	4.62457e-05	0.000619818	UP		NO
AT1G09080	5.09046	0.481981	2.7906e-10	1.446e-08	UP		NO
AT1G09090	1.72264	2.69145	4.95179e-10	2.43121e-08	UP		NO
AT1G09155	1.15279	0.419069	0.00019542	0.00208553	UP		NO
AT1G09170	1.28041	1.71506	1.13719e-05	0.000189518	UP		NO
AT1G09176	1.80834	-2.21395	0.00468456	0.0280649	UP		NO
AT1G09210	0.309227	6.89954	0.0065429	0.0366674	UP		YES	1:2973636:G-A;intronic_variant
AT1G09300	0.813442	3.18989	5.73885e-06	0.000105681	UP		YES	1:3008063:A-AG;exonic_variant&protein_coding,1:3008063:A-AG;exonic_variant
AT1G09330	0.361085	4.50601	0.00349447	0.0221194	UP		NO
AT1G09340	-0.339476	9.43107	0.00247533	0.0167615	DOWN		NO
AT1G09350	2.361	-0.749966	6.0684e-09	2.39052e-07	UP		NO
AT1G09540	0.670482	1.38066	0.00806995	0.0433707	UP		NO
AT1G09560	0.553539	6.1333	3.81272e-06	7.4229e-05	UP		NO
AT1G09590	0.527981	6.65665	9.06087e-05	0.00107643	UP		NO
AT1G09660	0.43446	4.86651	0.002624	0.017539	UP		NO
AT1G09690	0.440467	7.89125	0.00254872	0.0171764	UP		NO
AT1G09780	0.35405	6.45556	0.00419953	0.0256985	UP		NO
AT1G09794	0.72787	1.08351	0.00434363	0.0264219	UP		NO
AT1G09800	0.577094	2.20963	0.00515091	0.030256	UP		NO
AT1G09830	0.423947	4.5592	0.000515804	0.00463151	UP		NO
AT1G09930	2.79922	-2.85847	0.002432	0.0165245	UP		YES	1:3229788:G-A;protein_coding;missense;CTT>TTT;L>F
AT1G09932	1.38223	1.94095	2.3831e-06	4.92727e-05	UP		NO
AT1G09995	0.581177	2.30178	0.00786221	0.0425256	UP		NO
AT1G10000	-1.09798	-1.04302	0.00848797	0.0450965	DOWN		NO
AT1G10020	-0.85937	4.17456	7.74574e-06	0.000137091	DOWN		NO
AT1G10030	0.618747	3.46726	0.000577999	0.00507916	UP		NO
AT1G10050	0.744181	4.17964	1.01174e-06	2.32446e-05	UP		NO
AT1G10070	-1.3738	4.75613	7.58292e-09	2.8957e-07	DOWN		NO
AT1G10170	-0.318781	5.84223	0.00161682	0.0119238	DOWN		NO
AT1G10225	-2.56263	-0.909024	6.99277e-07	1.67038e-05	DOWN		NO
AT1G10300	1.29991	0.85383	3.52454e-05	0.000491146	UP		NO
AT1G10320	1.1997	4.81443	1.06366e-17	1.70596e-15	UP		NO
AT1G10340	1.36772	0.703413	2.02598e-05	0.000307374	UP		NO
AT1G10360	-0.454878	5.66484	6.51841e-05	0.000818286	DOWN		NO
AT1G10370	-0.866356	4.86966	3.80083e-08	1.24893e-06	DOWN		NO
AT1G10385	3.06361	-1.75061	0.000112382	0.00129584	UP		NO
AT1G10400	1.73858	-1.05669	0.00162393	0.0119605	UP		NO
AT1G10410	0.373584	5.51496	0.00153839	0.0114533	UP		NO
AT1G10417	1.19555	0.174188	8.35942e-05	0.00100627	UP		NO
AT1G10450	0.733316	5.33434	7.84686e-09	2.98971e-07	UP		NO
AT1G10480	-0.784789	2.06883	0.000180127	0.00194888	DOWN		NO
AT1G10490	0.517989	4.34668	0.000179904	0.00194709	UP		NO
AT1G10522	1.06649	4.51773	9.57589e-07	2.21667e-05	UP		NO
AT1G10530	0.982524	0.795491	0.000132086	0.00148888	UP		NO
AT1G10550	-1.99383	1.8778	1.2962e-07	3.73458e-06	DOWN		NO
AT1G10560	0.741369	1.1595	0.00208778	0.0146528	UP		NO
AT1G10570	0.401849	4.97036	0.000718841	0.00607256	UP		NO
AT1G10690	-0.586697	2.91666	0.00255608	0.017201	DOWN		NO
AT1G10720	0.482048	4.61351	0.000210194	0.00221651	UP		NO
AT1G10760	-0.354	8.21784	0.00832331	0.0444275	DOWN		YES	1:3582857:G-A;intronic_variant
AT1G10810	0.964683	-0.291417	0.00474101	0.0283274	UP		NO
AT1G10865	0.615368	3.88304	5.59502e-05	0.00072731	UP		NO
AT1G10890	0.305653	6.42349	0.00515659	0.0302735	UP	YES	NO
AT1G10900	-0.466171	6.39097	6.25078e-05	0.00079134	DOWN		NO
AT1G10980	3.49379	-2.82329	0.00175334	0.0127382	UP		NO
AT1G10990	0.94631	1.11549	0.000324767	0.00318071	UP		NO
AT1G11000	0.727081	3.92575	0.000152967	0.00168865	UP		NO
AT1G11040	5.89234	-2.68306	9.67297e-05	0.00113914	UP		NO
AT1G11160	1.63235	2.19026	5.51815e-12	3.9798e-10	UP		NO
AT1G11180	-0.446791	3.70178	0.00548559	0.0317894	DOWN		NO
AT1G11260	-0.887276	8.89622	4.16807e-05	0.000567211	DOWN		NO
AT1G11300	0.586047	2.368	0.00613941	0.0348175	UP		NO
AT1G11310	0.299057	6.69983	0.0085766	0.0454209	UP		NO
AT1G11330	0.791293	3.90737	2.56597e-06	5.26742e-05	UP		NO
AT1G11350	0.416829	4.54299	0.00158899	0.0117495	UP		NO
AT1G11380	-0.550906	3.28571	0.00364243	0.0229157	DOWN		NO
AT1G11475	0.408532	4.52797	0.000994616	0.00796284	UP		NO
AT1G11530	-0.391576	4.85456	0.00120237	0.00931141	DOWN		NO
AT1G11580	1.09512	6.02843	9.02916e-12	6.23179e-10	UP		NO
AT1G11655	1.98244	-0.183537	0.000154868	0.0017074	UP		NO
AT1G11670	0.557993	4.16548	9.1574e-05	0.00108641	UP		NO
AT1G11785	3.00882	0.546862	2.03996e-17	3.02678e-15	UP		NO
AT1G11840	0.425791	7.89456	7.12209e-05	0.000882557	UP		NO
AT1G11850	0.633701	3.0161	0.00545588	0.0316628	UP		NO
AT1G11890	0.495448	4.98662	1.84118e-05	0.000283422	UP		NO
AT1G11925	6.05283	-2.71839	0.00471093	0.0281731	UP		NO
AT1G11990	2.5225	-2.09959	0.000607699	0.00527659	UP		NO
AT1G12000	0.388892	5.94925	0.000993005	0.00795561	UP		NO
AT1G12040	1.05082	3.75723	0.00115047	0.00899674	UP		NO
AT1G12080	1.08368	4.63242	1.97105e-17	2.95053e-15	UP		NO
AT1G12090	-0.588808	9.84631	1.53608e-08	5.4864e-07	DOWN		NO
AT1G12160	0.798982	2.09769	0.00290407	0.0190965	UP		NO
AT1G12210	0.973646	1.68674	2.10792e-05	0.00031766	UP		NO
AT1G12220	-0.581349	4.1865	1.6753e-05	0.000261472	DOWN		NO
AT1G12230	-0.25886	6.74157	0.00887548	0.0466867	DOWN		NO
AT1G12280	0.636647	3.50848	6.10474e-05	0.000777956	UP		NO
AT1G12290	0.566166	2.66882	0.00505309	0.0297853	UP		NO
AT1G12390	0.524159	4.03578	0.000120438	0.00137508	UP		NO
AT1G12440	-0.372187	6.48894	0.00042965	0.00399863	DOWN		NO
AT1G12450	-0.448355	3.34908	0.00814166	0.0436446	DOWN		NO
AT1G12520	-1.38029	6.18785	1.10297e-21	2.6726e-19	DOWN		NO
AT1G12530	0.47318	3.70449	0.0023443	0.0160763	UP		NO
AT1G12560	1.3506	3.345	9.41792e-05	0.001113	UP		NO
AT1G12780	-1.30241	7.01703	4.72403e-29	1.96432e-26	DOWN		NO
AT1G12805	3.06634	2.08335	8.22964e-20	1.63049e-17	UP		NO
AT1G12855	-2.60541	-2.61851	0.00424054	0.0259212	DOWN		NO
AT1G12890	-1.97721	-1.64957	0.000315947	0.00310516	DOWN		NO
AT1G12930	0.486105	4.94981	1.43261e-05	0.000230319	UP		NO
AT1G12940	3.45369	-2.21272	5.19043e-05	0.000683153	UP		NO
AT1G12950	1.71657	2.33908	6.05725e-07	1.47303e-05	UP		NO
AT1G12980	-2.96252	-1.85335	0.000260204	0.00264814	DOWN		NO
AT1G12990	-0.573328	4.95404	2.78861e-06	5.66143e-05	DOWN		NO
AT1G13000	0.350494	4.41931	0.00673795	0.0375544	UP		NO
AT1G13030	-0.719188	2.58655	0.00149147	0.0111557	DOWN		YES	1:4447161:G-A;protein_coding;stop-gain;CGA>TGA;R>*
AT1G13050	0.656969	1.8342	0.00787705	0.0425717	UP		NO
AT1G13170	0.464989	4.94444	0.000433055	0.00402032	UP		NO
AT1G13210	0.919533	5.08479	1.91751e-06	4.08758e-05	UP		NO
AT1G13260	-0.640299	6.10086	0.00234455	0.0160763	DOWN		NO
AT1G13280	0.479269	5.30745	6.88594e-05	0.00085803	UP		NO
AT1G13310	3.32811	-2.07808	0.000209176	0.00220855	UP		NO
AT1G13340	1.97878	2.16455	1.76434e-10	9.66256e-09	UP		NO
AT1G13360	0.417455	6.19797	0.000484794	0.00440474	UP		NO
AT1G13390	0.549691	5.13139	3.52316e-06	6.93129e-05	UP		NO
AT1G13410	0.703966	1.20361	0.00616117	0.0349174	UP		NO
AT1G13420	2.0586	1.4647	7.54006e-07	1.78969e-05	UP		NO
AT1G13430	0.775338	2.25583	0.00290766	0.0191085	UP		NO
AT1G13448	1.09288	2.15504	2.28466e-06	4.74411e-05	UP		NO
AT1G13460	0.331486	4.40422	0.00835665	0.0445567	UP		NO
AT1G13470	4.04805	-1.41543	1.08179e-05	0.000182318	UP		NO
AT1G13480	2.00215	-1.45764	0.000298221	0.00295423	UP		NO
AT1G13520	3.06386	0.710291	1.14382e-08	4.21959e-07	UP		NO
AT1G13530	-1.03069	0.986518	0.00734455	0.0403214	DOWN		NO
AT1G13570	0.485051	4.71164	0.000396921	0.00375737	UP		NO
AT1G13580	0.544552	3.396	0.000532359	0.0047542	UP		NO
AT1G13600	0.961128	0.401675	0.00141358	0.0106703	UP		NO
AT1G13620	2.97932	-1.25462	2.59181e-08	8.77333e-07	UP		NO
AT1G13700	-1.04902	4.23068	8.70419e-10	4.06047e-08	DOWN		NO
AT1G13710	-1.96321	1.27766	0.00119384	0.00926278	DOWN		NO
AT1G13750	1.74142	3.4988	3.50618e-11	2.21145e-09	UP		NO
AT1G13800	1.15491	0.459609	0.000110625	0.00127996	UP		NO
AT1G13810	0.593293	2.40362	0.00908877	0.0475857	UP		NO
AT1G13830	0.805105	1.38806	0.0021504	0.0150078	UP		NO
AT1G13930	-0.694224	9.40796	1.77639e-10	9.71277e-09	DOWN		YES	1:4761319:G-A;protein_coding;missense;GCT>ACT;A>T
AT1G13950	0.781798	3.27566	4.9593e-06	9.30553e-05	UP		NO
AT1G14030	-0.374683	5.87295	0.000378606	0.0036114	DOWN		NO
AT1G14040	0.523047	3.28486	0.00462087	0.0278069	UP		YES	1:4811646:A-AT;exonic_variant,1:4811646:A-AT;intronic_variant
AT1G14060	0.720374	2.99868	0.000407078	0.00383326	UP		NO
AT1G14070	0.903726	1.86632	1.85192e-05	0.000284555	UP		NO
AT1G14080	1.39467	1.60919	7.57496e-07	1.79544e-05	UP		NO
AT1G14100	2.70192	-2.5604	0.000909427	0.00740401	UP		NO
AT1G14120	0.800614	3.47914	0.000381842	0.00363599	UP		NO
AT1G14130	0.475883	3.02612	0.0076425	0.041591	UP		NO
AT1G14160	0.717302	1.92356	0.00252787	0.0170521	UP		NO
AT1G14170	0.672243	3.57495	0.00663914	0.0370711	UP		NO
AT1G14210	1.05041	4.03639	1.10629e-12	9.02202e-11	UP		NO
AT1G14220	1.78233	-0.307981	1.43171e-05	0.000230283	UP		NO
AT1G14230	0.36599	4.67275	0.0018563	0.0133509	UP		NO
AT1G14240	1.63616	1.68944	4.41744e-07	1.11522e-05	UP		NO
AT1G14250	4.23115	1.05678	8.85919e-05	0.00105773	UP		YES	1:4870090:A-AG;intronic_variant
AT1G14280	-0.879874	6.41319	2.1147e-16	2.80414e-14	DOWN		NO
AT1G14345	-0.388374	5.98264	0.000682352	0.00581242	DOWN		NO
AT1G14390	0.698122	1.54494	0.00449184	0.0271518	UP		NO
AT1G14450	0.454847	5.23693	0.00015782	0.00173711	UP		NO
AT1G14520	-0.702529	2.73307	0.000262674	0.00267124	DOWN		NO
AT1G14540	3.27794	-0.903122	3.96885e-11	2.47088e-09	UP		NO
AT1G14550	3.10245	-2.97289	0.00693356	0.0384854	UP		NO
AT1G14620	0.697036	4.04241	4.19279e-05	0.000570115	UP		NO
AT1G14780	0.797781	1.95264	0.00455652	0.0274885	UP		NO
AT1G14790	0.435548	3.6689	0.00297444	0.0194453	UP		NO
AT1G14810	0.778307	5.63131	1.23975e-09	5.62749e-08	UP		NO
AT1G14860	0.924317	2.97758	1.53864e-07	4.34392e-06	UP		NO
AT1G14870	1.48853	4.32062	5.81861e-08	1.81628e-06	UP		NO
AT1G14880	8.46854	0.863093	2.48746e-15	2.95001e-13	UP		NO
AT1G14920	-0.47844	5.50187	5.50547e-05	0.000717052	DOWN		NO
AT1G14960	2.25639	1.50939	2.6223e-14	2.68455e-12	UP		NO
AT1G14980	0.775155	5.87134	1.73096e-09	7.61103e-08	UP		NO
AT1G15050	-1.21103	-0.0378887	0.00409207	0.0252057	DOWN		NO
AT1G15100	0.659986	3.97434	1.34011e-05	0.000217315	UP		NO
AT1G15120	0.707789	5.89886	2.69144e-10	1.39893e-08	UP		NO
AT1G15125	3.97757	4.44248	4.67583e-17	6.64705e-15	UP		YES	1:5205941:G-T;exonic_variant
AT1G15180	-0.353966	5.5481	0.00736469	0.040399	DOWN		NO
AT1G15210	0.622662	4.70018	0.000724657	0.00611249	UP		NO
AT1G15270	0.649953	6.6971	1.48508e-09	6.64264e-08	UP		NO
AT1G15290	-0.452806	7.93162	2.9905e-05	0.000426251	DOWN		NO
AT1G15340	-0.267302	7.47607	0.00477179	0.028476	DOWN		NO
AT1G15405	1.63756	-0.215331	6.47933e-05	0.000814901	UP		NO
AT1G15415	2.75831	-2.10055	0.000122304	0.00139119	UP		NO
AT1G15420	0.600264	3.88615	0.000103126	0.00120478	UP		NO
AT1G15440	0.618667	4.20222	0.000271268	0.0027429	UP		NO
AT1G15460	0.816337	0.693567	0.0024133	0.0164306	UP		NO
AT1G15470	0.384304	3.77591	0.00759275	0.0413872	UP		NO
AT1G15480	0.736817	2.97824	0.000342993	0.00332824	UP		NO
AT1G15520	7.75229	2.74168	2.04751e-60	4.31013e-57	UP		NO
AT1G15580	-1.81984	0.542748	1.04056e-05	0.000177005	DOWN		NO
AT1G15630	1.79633	-1.76796	0.00652778	0.0366132	UP		NO
AT1G15790	1.26819	1.74298	7.51999e-09	2.88147e-07	UP		NO
AT1G15870	1.41998	0.169847	4.68705e-05	0.000627442	UP		NO
AT1G15940	-0.352206	5.3383	0.00483334	0.0287466	DOWN		NO
AT1G15950	-0.368461	7.16271	0.000530448	0.00474277	DOWN		NO
AT1G15980	-0.66525	8.01308	1.02748e-07	3.04635e-06	DOWN		YES	1:5489653:G-A;protein_coding;missense;GAT>AAT;D>N
AT1G16000	1.09989	3.25223	1.62784e-07	4.55376e-06	UP		NO
AT1G16060	0.558473	2.72226	0.00575749	0.0330749	UP		NO
AT1G16220	0.859921	2.36531	0.00136218	0.0103589	UP		NO
AT1G16300	0.831603	3.45885	2.13304e-06	4.46229e-05	UP		NO
AT1G16350	0.454021	5.47626	0.00106991	0.00847501	UP		NO
AT1G16360	1.33206	-1.03851	0.00191868	0.0137001	UP		NO
AT1G16410	1.05975	5.91888	3.52644e-06	6.93368e-05	UP		NO
AT1G16420	1.67564	-1.26074	0.00836431	0.0445828	UP		NO
AT1G16440	1.45107	1.11413	0.000342584	0.00332524	UP		NO
AT1G16460	-0.283268	6.09143	0.00818709	0.0438114	DOWN		NO
AT1G16489	0.745321	1.1721	0.0027357	0.0181918	UP		NO
AT1G16510	0.914403	0.58399	0.00223041	0.0154522	UP		NO
AT1G16540	1.04756	4.35873	1.03827e-16	1.42734e-14	UP		NO
AT1G16560	0.431677	5.66033	0.000152635	0.00168776	UP		NO
AT1G16670	0.478249	3.48433	0.00547157	0.03173	UP		NO
AT1G16680	0.438245	5.0239	0.0014999	0.0112038	UP		NO
AT1G16705	1.76397	-1.70237	0.00145625	0.0109238	UP		NO
AT1G16720	-0.407323	8.29841	0.000685348	0.00583499	DOWN		NO
AT1G16850	1.01402	2.05048	8.87378e-06	0.00015414	UP		NO
AT1G16890	0.340176	6.43594	0.000450558	0.00414511	UP		NO
AT1G16916	0.670269	2.02646	0.00416733	0.0255432	UP		NO
AT1G16920	0.372523	5.06653	0.00517152	0.0303481	UP		NO
AT1G16930	0.987678	3.30253	3.58234e-08	1.18291e-06	UP		NO
AT1G17090	0.680684	1.23811	0.00350522	0.0221791	UP		NO
AT1G17100	0.384807	5.86488	0.00196073	0.0139265	UP		NO
AT1G17140	0.406208	5.51055	0.00809402	0.0434515	UP		NO
AT1G17145	1.08445	5.29738	6.03833e-18	9.87268e-16	UP		NO
AT1G17170	0.903749	2.86218	0.000893604	0.00729282	UP		NO
AT1G17180	1.4618	2.54194	1.63045e-06	3.55208e-05	UP		NO
AT1G17285	1.15107	-0.157823	0.00107524	0.00850916	UP		NO
AT1G17345	-0.935159	0.419712	0.00206593	0.0145327	DOWN		NO
AT1G17400	0.931961	0.0290799	0.00433245	0.026392	UP		NO
AT1G17430	0.678137	2.50557	0.00246925	0.0167338	UP		NO
AT1G17500	0.502673	5.12972	3.4605e-05	0.000484025	UP		NO
AT1G17560	0.869746	1.99664	0.00231692	0.0159355	UP		NO
AT1G17600	1.69144	0.383383	5.10662e-07	1.25728e-05	UP		NO
AT1G17610	1.23493	-0.39396	0.00162061	0.0119413	UP		NO
AT1G17615	6.22416	-2.62059	0.000650958	0.00558454	UP		NO
AT1G17620	-0.369936	5.02417	0.00341219	0.0217375	DOWN		NO
AT1G17650	-0.445063	4.63814	0.000640668	0.00550749	DOWN		NO
AT1G17680	0.312536	5.13008	0.00497594	0.0294439	UP		NO
AT1G17690	0.444308	4.44489	0.000967433	0.00779524	UP		YES	1:6086818:A-AT;intronic_variant
AT1G17710	5.72021	4.19096	1.86477e-09	8.10419e-08	UP		NO
AT1G17745	1.58402	5.48985	2.15225e-11	1.40213e-09	UP		NO
AT1G17760	0.460135	4.90992	0.000135731	0.00152436	UP		NO
AT1G17810	-3.2847	2.41174	1.28855e-21	3.09997e-19	DOWN		NO
AT1G17840	-0.403963	6.79231	0.000121749	0.00138675	DOWN		NO
AT1G17860	0.624449	6.05582	3.74466e-06	7.31152e-05	UP		NO
AT1G17870	-1.41449	4.44147	2.31027e-08	7.93194e-07	DOWN		NO
AT1G17970	-0.391223	4.40651	0.00330789	0.0212134	DOWN		NO
AT1G18000	-0.53881	5.33287	3.79148e-06	7.39437e-05	DOWN		NO
AT1G18020	-0.818521	4.96808	7.93414e-05	0.000966124	DOWN		NO
AT1G18090	1.16821	3.23813	6.06515e-10	2.92246e-08	UP		NO
AT1G18160	0.348393	6.08632	0.000587789	0.0051435	UP		NO
AT1G18180	0.613285	2.12155	0.00582292	0.0333711	UP		NO
AT1G18200	-0.742982	1.61245	0.00240152	0.0163638	DOWN		NO
AT1G18210	0.358349	4.41354	0.0088695	0.0466625	UP		NO
AT1G18265	-0.490093	3.50276	0.00344004	0.0218735	DOWN		NO
AT1G18330	-0.367208	6.2649	0.0041132	0.0253124	DOWN		NO
AT1G18340	0.788861	3.82622	3.22976e-07	8.45233e-06	UP		NO
AT1G18410	1.73388	-0.584606	6.04588e-06	0.000110609	UP		NO
AT1G18420	1.40956	1.45396	4.67197e-06	8.86018e-05	UP		NO
AT1G18460	-0.333623	6.08111	0.00114694	0.00897956	DOWN		NO
AT1G18540	0.509609	7.65177	5.40873e-05	0.000706913	UP		NO
AT1G18570	0.869976	4.38288	4.78595e-06	9.03562e-05	UP		NO
AT1G18590	0.512201	4.63655	0.00260799	0.0174597	UP		NO
AT1G18630	0.674502	2.72445	0.00065735	0.00562791	UP		NO
AT1G18670	-0.404206	4.67035	0.00428697	0.0261528	DOWN		NO
AT1G18710	-0.950553	4.30903	6.07346e-05	0.000774849	DOWN		NO
AT1G18745	0.679789	3.02645	0.000712904	0.00602996	UP		NO
AT1G18800	0.869603	4.87417	2.209e-10	1.16983e-08	UP		NO
AT1G18830	-2.606	-0.17987	3.57559e-11	2.24682e-09	DOWN		NO
AT1G18835	1.48407	-1.07979	0.00178082	0.0128906	UP		NO
AT1G18850	0.573665	3.0651	0.00462749	0.0278145	UP		NO
AT1G18870	1.04573	2.15853	0.000191173	0.00205126	UP		YES	1:6517797:G-A;protein_coding;missense;AGA>AAA;R>K
AT1G18970	1.43754	-1.32415	0.00762608	0.0415305	UP		NO
AT1G18980	0.746739	3.99312	0.000101977	0.00119384	UP		NO
AT1G19020	1.97988	2.56229	6.80767e-08	2.09972e-06	UP		NO
AT1G19025	0.740152	1.76905	0.000824839	0.00681709	UP		NO
AT1G19050	-1.32004	3.37038	3.43476e-05	0.000481023	DOWN		NO
AT1G19100	0.749249	3.94931	5.59953e-07	1.36963e-05	UP		NO
AT1G19130	0.392928	4.94916	0.00165159	0.0121113	UP		NO
AT1G19200	1.91	1.94017	3.94038e-05	0.000541919	UP		NO
AT1G19230	1.23023	2.76428	2.32832e-08	7.97764e-07	UP		NO
AT1G19250	2.07522	2.13494	5.46313e-09	2.17499e-07	UP		NO
AT1G19270	0.418983	4.27421	0.00324856	0.0209086	UP		NO
AT1G19350	-0.296523	7.75155	0.00260995	0.0174659	DOWN		NO
AT1G19360	0.343534	5.24402	0.00198902	0.0140917	UP		NO
AT1G19380	1.01084	2.60064	0.00491063	0.0291165	UP		NO
AT1G19400	-0.467759	6.68423	5.40168e-06	0.000100683	DOWN		NO
AT1G19485	-0.589428	4.91119	3.08069e-06	6.19837e-05	DOWN		NO
AT1G19510	1.26232	0.860866	1.59759e-05	0.000251923	UP		NO
AT1G19540	-1.11209	1.69258	2.71408e-06	5.52343e-05	DOWN		NO
AT1G19610	1.53364	0.93716	3.7885e-08	1.2461e-06	UP		NO
AT1G19630	2.66583	-1.23045	3.33715e-07	8.67272e-06	UP		NO
AT1G19670	1.84936	4.59015	1.13769e-10	6.47271e-09	UP		NO
AT1G19690	0.591458	3.8342	0.000219983	0.00229673	UP		NO
AT1G19710	0.755112	3.89113	1.47125e-06	3.2409e-05	UP		NO
AT1G19840	0.920264	1.55099	0.000354273	0.00342193	UP		NO
AT1G19940	1.29854	-0.423204	0.000820379	0.00678566	UP		NO
AT1G19960	3.1062	2.32263	6.18422e-16	7.83048e-14	UP		NO
AT1G20015	2.09933	-1.27709	1.08975e-05	0.000183245	UP		NO
AT1G20020	-0.852841	9.10169	2.83965e-13	2.53022e-11	DOWN		NO
AT1G20050	0.286113	5.70845	0.00723813	0.0398736	UP		NO
AT1G20065	1.44251	-1.15686	0.00138691	0.0105114	UP		NO
AT1G20070	1.14505	2.97834	3.85215e-08	1.26333e-06	UP		NO
AT1G20100	0.440263	6.29422	2.14254e-05	0.000322012	UP		NO
AT1G20110	0.39731	6.47212	8.54357e-05	0.00102645	UP		NO
AT1G20190	0.447275	5.36281	0.00463339	0.0278425	UP		NO
AT1G20330	-0.539819	6.48106	3.85739e-06	7.50119e-05	DOWN		NO
AT1G20380	0.877016	2.94731	2.7185e-07	7.23809e-06	UP		NO
AT1G20410	0.450279	3.39369	0.00865526	0.0457427	UP		NO
AT1G20430	0.492557	4.22307	0.00137809	0.0104586	UP		NO
AT1G20515	1.42541	-0.879453	0.00497872	0.0294527	UP		NO
AT1G20640	0.644536	5.42041	9.87641e-10	4.57462e-08	UP		NO
AT1G20691	0.779639	2.44951	0.00014116	0.00157588	UP		NO
AT1G20735	5.13817	-3.09878	0.00279061	0.0184766	UP		NO
AT1G20770	0.503742	4.31486	0.000244694	0.00251651	UP		NO
AT1G20795	5.30801	-0.797045	1.87251e-21	4.4414e-19	UP		NO
AT1G20823	1.04648	2.52376	4.82231e-06	9.08341e-05	UP		NO
AT1G20860	4.11852	-1.39013	8.93127e-05	0.00106483	UP		NO
AT1G20900	0.577664	3.58487	0.00491083	0.0291165	UP		NO
AT1G20990	-1.03134	0.501376	0.00149502	0.011179	DOWN		NO
AT1G21110	1.55985	3.5897	1.7661e-08	6.24833e-07	UP		NO
AT1G21120	1.90853	1.18152	1.78241e-09	7.79652e-08	UP		NO
AT1G21170	0.377458	4.9832	0.000693205	0.00589146	UP		NO
AT1G21240	7.89952	0.351247	2.83282e-31	1.32517e-28	UP		NO
AT1G21250	4.2821	3.99306	8.39878e-37	5.05141e-34	UP		NO
AT1G21270	1.25443	3.52629	6.9872e-06	0.000125579	UP		NO
AT1G21310	1.8692	9.18718	9.71749e-19	1.73172e-16	UP		NO
AT1G21320	1.55218	1.12899	0.000216965	0.00227227	UP		NO
AT1G21340	1.62404	-1.80512	0.00209078	0.0146707	UP		NO
AT1G21350	-0.449302	5.43807	4.93148e-05	0.000653669	DOWN		NO
AT1G21360	-0.962118	2.43279	3.17405e-07	8.32055e-06	DOWN		NO
AT1G21370	0.533551	4.2654	4.33781e-05	0.000587698	UP		NO
AT1G21390	0.595394	2.55783	0.00704586	0.039038	UP		NO
AT1G21400	-0.603022	7.71687	1.49255e-06	3.27924e-05	DOWN		NO
AT1G21410	-0.449176	5.72396	0.000128885	0.00145621	DOWN		NO
AT1G21460	0.609474	4.49892	7.84604e-05	0.000957473	UP		YES	1:7511961:G-A;exonic_variant
AT1G21500	-0.362332	7.62752	0.000476696	0.00434875	DOWN		NO
AT1G21520	1.44418	2.87617	3.2654e-09	1.3578e-07	UP		NO
AT1G21525	3.71684	-0.224465	1.13508e-05	0.000189438	UP		NO
AT1G21640	-0.316438	6.62154	0.00924071	0.0482312	DOWN		NO
AT1G21670	-0.421916	5.34025	0.000407101	0.00383326	DOWN		NO
AT1G21680	-0.665792	7.30163	3.96776e-09	1.61594e-07	DOWN		NO
AT1G21910	-1.08129	4.92635	4.33434e-06	8.25706e-05	DOWN		NO
AT1G22070	0.403154	5.15058	0.0028894	0.0190074	UP		NO
AT1G22120	-4.69124	-3.28367	0.00726734	0.0400019	DOWN		NO
AT1G22170	0.721688	3.33197	8.47108e-05	0.00101898	UP		NO
AT1G22180	0.59359	3.63951	0.000801822	0.0066534	UP		NO
AT1G22220	1.51327	1.51775	3.95367e-06	7.63116e-05	UP		NO
AT1G22330	-0.569584	3.4188	0.00229318	0.0158013	DOWN		NO
AT1G22370	-0.737072	4.78901	9.01067e-10	4.19763e-08	DOWN		NO
AT1G22430	-0.46014	6.65904	2.11355e-06	4.43254e-05	DOWN		NO
AT1G22440	0.565158	4.45742	0.000448544	0.00413223	UP		YES	1:7924615:A-AT;intronic_variant
AT1G22460	2.31762	-0.721217	6.79437e-06	0.00012244	UP		NO
AT1G22530	-0.743322	6.21937	0.000228684	0.00237443	DOWN		NO
AT1G22700	-0.513537	6.26455	1.45736e-06	3.21685e-05	DOWN		NO
AT1G22710	-0.468027	7.61122	1.61953e-05	0.000254538	DOWN		NO
AT1G22750	-0.273919	5.94171	0.00964913	0.0499067	DOWN		NO
AT1G22780	0.356616	6.38692	0.00622705	0.0352042	UP		YES	1:8068529:C-T;intronic_variant
AT1G22830	0.682677	1.9654	0.00824444	0.0440694	UP		NO
AT1G22840	0.520679	6.12135	3.92278e-06	7.58892e-05	UP		NO
AT1G22850	-0.42071	7.48661	4.3545e-05	0.000589722	DOWN		NO
AT1G22880	1.06015	1.4109	6.49682e-05	0.00081661	UP		NO
AT1G22882	-0.68122	4.7863	0.000227938	0.00236877	DOWN		NO
AT1G22890	0.563348	4.24804	0.00852346	0.0452296	UP		NO
AT1G22990	-0.666847	3.47204	0.000494757	0.00447978	DOWN		NO
AT1G23030	-0.550465	5.50478	0.000133236	0.00150034	DOWN		NO
AT1G23040	0.732007	4.17847	6.4599e-08	1.99611e-06	UP		YES	1:8165574:G-A;intronic_variant,1:8165574:G-A;exonic_variant
AT1G23060	0.925217	3.32024	0.000442153	0.00408564	UP		NO
AT1G23070	1.10944	-0.690698	0.00657879	0.0368318	UP		NO
AT1G23080	0.277828	7.4969	0.00900266	0.0472408	UP		NO
AT1G23100	1.45729	1.99928	7.98205e-10	3.73913e-08	UP		NO
AT1G23110	3.66023	1.73499	5.37993e-06	0.000100344	UP		NO
AT1G23140	2.06986	2.47514	3.83205e-08	1.25797e-06	UP		NO
AT1G23149	1.64039	1.69517	4.81188e-09	1.9271e-07	UP		NO
AT1G23170	0.715187	2.61127	0.000858536	0.00704933	UP		NO
AT1G23210	1.19704	-0.824858	0.00715284	0.0395137	UP		NO
AT1G23280	0.464079	4.42125	0.000863425	0.00707911	UP		NO
AT1G23290	0.354749	6.74013	0.00472001	0.028222	UP		NO
AT1G23310	-0.338664	11.5283	0.00100673	0.00804834	DOWN		YES	1:8269277:GCTAAAGAAATGTGCAAAAGGGCGATTTGTTATTCAATCCAGGGATGATGATCACGAGCATGTAAGCTTATATATATAC-G;intronic_variant&splice_acceptor_region_variant,1:8269567:AACCTGCAAATTCAGAAATCGTATTATGATTATGTTATGTTTGACACATTACATAAGTAAGTAAACAGAGAGTAAGACAG-A;intronic_variant,1:8268849:ACTGTCAAAATCCACAAGTGGAATGAGTTCATAAGAAGAGATCAGATGAGCAAGAAAGAAACAGTAGTAGCAGATTCTTTAC-A;intronic_variant&splice_donor_region_variant&splice_do…
AT1G23340	0.926553	2.06092	1.22577e-05	0.000201489	UP		NO
AT1G23360	0.374422	4.49889	0.00436799	0.0265461	UP		NO
AT1G23400	-0.385305	6.67381	0.000102584	0.00119928	DOWN		NO
AT1G23410	0.837402	2.8554	6.51661e-05	0.000818286	UP		NO
AT1G23480	-0.560767	4.2629	0.00048247	0.00438905	DOWN		YES	1:8334414:G-A;splice_donor_region_variant
AT1G23720	0.804808	6.04709	8.30506e-05	0.00100151	UP		NO
AT1G23730	2.13595	5.46445	3.42419e-09	1.41336e-07	UP		NO
AT1G23750	0.468454	3.26923	0.00761781	0.0415037	UP		NO
AT1G23840	0.776197	1.43209	0.00793277	0.0427699	UP		NO
AT1G23860	0.640928	5.30336	1.60859e-05	0.00025341	UP		NO
AT1G23870	-0.631841	6.5578	2.65305e-10	1.38324e-08	DOWN		NO
AT1G23900	0.80964	5.92213	3.76455e-14	3.74023e-12	UP		NO
AT1G23965	1.50849	0.135186	6.57369e-07	1.5812e-05	UP		NO
AT1G24020	1.26086	5.6179	5.6673e-10	2.75044e-08	UP		NO
AT1G24050	0.418135	5.84474	0.00100978	0.00806697	UP		NO
AT1G24070	2.47538	1.52801	1.31467e-06	2.94021e-05	UP		NO
AT1G24090	2.51798	0.784607	9.88581e-15	1.08105e-12	UP		NO
AT1G24095	1.24147	1.21516	4.5277e-08	1.45097e-06	UP		NO
AT1G24100	0.522989	5.67013	0.00100814	0.00805582	UP		YES	1:8527043:G-GA;exonic_variant
AT1G24140	2.29806	1.21358	9.89426e-09	3.69865e-07	UP		NO
AT1G24145	1.03418	2.86031	0.00138785	0.0105161	UP		NO
AT1G24147	1.77621	1.72741	2.71665e-05	0.000393039	UP		NO
AT1G24150	0.82737	3.31862	1.20848e-05	0.000199231	UP		YES	1:8551176:A-AG;intronic_variant,1:8551176:A-AG;exonic_variant&protein_coding
AT1G24160	-0.316531	6.83266	0.001672	0.012229	DOWN		YES	1:8555353:C-T;intronic_variant,1:8555353:C-T;protein_coding;missense;GTG>ATG;V>M
AT1G24170	-0.454685	4.93644	0.00209303	0.0146727	DOWN		NO
AT1G24180	0.463728	6.02748	0.000167392	0.00182576	UP		NO
AT1G24260	-1.73126	0.868598	1.39053e-10	7.75387e-09	DOWN		NO
AT1G24265	0.557505	2.34164	0.00607784	0.034544	UP		NO
AT1G24360	0.276071	6.79083	0.00721046	0.0397667	UP		NO
AT1G24380	6.23925	-2.59276	3.88445e-07	9.94921e-06	UP		NO
AT1G24575	1.02336	1.65986	0.00558761	0.032253	UP		NO
AT1G24825	0.396019	7.19575	0.00426887	0.0260565	UP		NO
AT1G25055	-6.23188	-0.183678	0.00771315	0.0419131	DOWN		NO
AT1G25145	-0.442587	4.16647	0.00677136	0.0376906	DOWN		NO
AT1G25220	0.896588	4.39385	4.33994e-07	1.09758e-05	UP		NO
AT1G25260	0.365035	5.31234	0.00282409	0.0186618	UP		NO
AT1G25275	0.586872	6.12735	0.000246402	0.00252713	UP		YES	1:8861339:G-A;exonic_variant
AT1G26230	0.494631	4.98451	5.2203e-05	0.00068628	UP		NO
AT1G26260	0.522055	2.85943	0.00578303	0.0331933	UP		NO
AT1G26300	0.463032	3.8974	0.000846599	0.00695933	UP		NO
AT1G26340	0.807732	3.65323	7.40473e-08	2.26314e-06	UP		NO
AT1G26380	4.93047	1.72837	5.40038e-20	1.09572e-17	UP		NO
AT1G26390	8.34697	2.39649	6.13632e-43	5.04091e-40	UP		YES	1:9131471:C-T;protein_coding;missense;GCA>ACA;A>T
AT1G26410	3.6736	0.16869	2.63657e-11	1.69794e-09	UP		NO
AT1G26420	2.3109	1.4707	5.70087e-11	3.45343e-09	UP		NO
AT1G26440	0.610917	5.37943	1.30873e-07	3.76426e-06	UP		YES	1:9145921:C-T;intronic_variant,1:9145921:C-T;exonic_variant
AT1G26470	0.486438	3.40685	0.00407084	0.0250835	UP		NO
AT1G26558	3.15378	-0.157346	1.21723e-06	2.74231e-05	UP		NO
AT1G26560	-0.757735	4.95118	4.79986e-07	1.19309e-05	DOWN		NO
AT1G26580	0.334157	7.33392	0.00418243	0.0256217	UP		NO
AT1G26640	0.562859	4.75599	4.88524e-06	9.1819e-05	UP		NO
AT1G26660	0.499599	2.65815	0.00851001	0.0451738	UP		NO
AT1G26690	0.460293	4.05337	0.000581755	0.00510512	UP		NO
AT1G26740	0.558571	3.38188	0.000427486	0.00398069	UP		NO
AT1G26761	-0.758071	4.93167	6.04248e-09	2.38589e-07	DOWN		NO
AT1G26820	0.692847	2.28584	0.00387696	0.024163	UP		NO
AT1G26830	-0.351742	6.07532	0.000702462	0.0059611	DOWN		YES	1:9296698:G-A;protein_coding;missense;GGG>AGG;G>R,1:9296698:G-A;exonic_variant
AT1G26840	0.915038	1.07035	0.000423376	0.00394988	UP		NO
AT1G26880	0.40791	6.03223	0.00202205	0.0142867	UP		NO
AT1G26910	0.497344	3.29351	0.002384	0.0162904	UP		NO
AT1G26911	1.83638	-1.48865	0.00123105	0.00949461	UP		NO
AT1G26920	-0.378383	6.13337	0.00465165	0.027937	DOWN		NO
AT1G26940	0.465177	3.443	0.00220139	0.0153065	UP		NO
AT1G26970	1.61337	0.709346	1.67332e-06	3.63496e-05	UP		NO
AT1G27020	1.86168	2.17995	1.91317e-07	5.2688e-06	UP		NO
AT1G27030	0.443751	4.67297	0.00312198	0.0202409	UP		YES	1:9383584:GT-G;intronic_variant,1:9383536:T-TA;intronic_variant
AT1G27045	1.17631	-0.733574	0.00737171	0.0404244	UP		NO
AT1G27060	0.903527	1.67999	0.000212289	0.00223301	UP		NO
AT1G27090	-0.251522	7.31435	0.00769394	0.0418237	DOWN		NO
AT1G27140	1.76805	0.796556	3.8084e-07	9.76184e-06	UP		NO
AT1G27330	0.532582	5.11019	0.000118951	0.00136087	UP		NO
AT1G27350	0.429631	5.03716	0.000296274	0.002941	UP		NO
AT1G27390	0.451578	4.62465	0.000829431	0.00684115	UP		NO
AT1G27400	0.532107	6.64755	4.90428e-05	0.000651088	UP		NO
AT1G27435	0.495169	3.98194	0.0022742	0.0156962	UP		NO
AT1G27450	0.343424	6.04921	0.00466018	0.0279686	UP		NO
AT1G27461	-3.11669	-1.85468	0.00102193	0.00815434	DOWN		NO
AT1G27470	0.447264	4.37305	0.000879356	0.00719922	UP		NO
AT1G27510	-0.665559	6.16008	1.83608e-10	9.97787e-09	DOWN		NO
AT1G27680	0.859118	4.34069	1.37618e-06	3.05949e-05	UP		YES	1:9633628:G-A;intronic_variant
AT1G27730	1.92384	3.94519	1.42042e-05	0.000228796	UP		NO
AT1G27740	1.36923	1.21365	0.000202832	0.00215168	UP		NO
AT1G27880	0.717063	1.86089	0.008905	0.0468022	UP		NO
AT1G27940	0.660036	1.37066	0.00879513	0.0463147	UP		NO
AT1G27950	-0.300481	6.80462	0.00779016	0.0422377	DOWN		NO
AT1G27990	4.33658	-1.92153	3.29933e-07	8.58278e-06	UP		NO
AT1G28005	4.02667	-2.58895	0.000179027	0.00193947	UP		NO
AT1G28010	0.545068	3.84714	0.00261422	0.017484	UP		NO
AT1G28190	0.963889	3.57712	0.000271704	0.00274483	UP		YES	1:9847448:C-T;protein_coding;missense;GGC>GAC;G>D
AT1G28210	0.909275	1.99264	4.56073e-05	0.00061248	UP		NO
AT1G28230	1.10505	3.99709	2.25634e-13	2.03742e-11	UP		NO
AT1G28240	0.321408	5.57194	0.00411434	0.0253124	UP		NO
AT1G28260	-0.290431	5.65429	0.00482904	0.0287362	DOWN		NO
AT1G28290	0.678275	6.94293	0.00164012	0.0120455	UP		NO
AT1G28330	-0.408478	7.28658	0.00111211	0.00874755	DOWN		NO
AT1G28350	0.328425	4.77549	0.00618637	0.0350249	UP		YES	1:9946881:G-A;intronic_variant,1:9946295:G-A;intronic_variant
AT1G28370	1.70012	2.55283	2.74649e-05	0.000395996	UP		NO
AT1G28395	0.804695	2.46843	0.00129781	0.00994125	UP		NO
AT1G28400	0.375919	6.0456	0.00195576	0.0139	UP		YES	1:9972606:G-GT;exonic_variant
AT1G28480	4.11467	0.16007	7.25448e-09	2.78925e-07	UP		NO
AT1G28520	-0.325578	6.09205	0.0017043	0.0124443	DOWN		NO
AT1G28580	-0.286035	6.69281	0.0040695	0.0250835	DOWN		NO
AT1G28620	1.09249	2.07959	9.50381e-07	2.2015e-05	UP		NO
AT1G28670	-0.455037	5.44501	0.000572198	0.00504904	DOWN		NO
AT1G28765	0.727417	1.67585	0.00865388	0.0457427	UP		NO
AT1G29025	1.25075	2.34047	7.11578e-06	0.000127618	UP		NO
AT1G29050	0.367599	4.57737	0.0027861	0.0184576	UP		YES	1:10138018:C-T;intronic_variant
AT1G29090	1.43294	-0.411749	0.000458146	0.0042	UP		NO
AT1G29195	0.858188	1.13031	0.00112958	0.00886838	UP		NO
AT1G29250	0.794526	4.42186	1.33061e-07	3.81029e-06	UP		NO
AT1G29280	0.435517	4.58741	0.00738955	0.040509	UP		NO
AT1G29290	1.06883	0.425671	0.00554962	0.0320777	UP		NO
AT1G29310	0.422612	4.77055	0.000980378	0.00788446	UP		YES	1:10253007:TA-T;splice_donor_region_variant&splice_donor_variant,1:10253013:G-GT;splice_donor_region_variant
AT1G29320	0.81293	3.2224	1.50125e-05	0.000239637	UP		NO
AT1G29330	0.639289	3.73461	2.08201e-05	0.000314457	UP		NO
AT1G29418	1.26531	3.89913	3.7478e-17	5.41758e-15	UP		NO
AT1G29430	-0.472194	3.25758	0.00576901	0.0331298	DOWN		NO
AT1G29440	-0.745783	3.55391	5.34979e-05	0.000700297	DOWN		NO
AT1G29450	-0.556612	2.69804	0.00345996	0.021967	DOWN		NO
AT1G29460	-0.787969	2.86964	5.48524e-05	0.000714971	DOWN		NO
AT1G29510	-0.48801	3.37323	0.00254885	0.0171764	DOWN		NO
AT1G29630	0.965516	2.98863	3.88517e-06	7.53781e-05	UP		NO
AT1G29720	-0.956636	3.10876	0.000638783	0.00549508	DOWN		NO
AT1G29860	1.98227	-1.77006	0.000275569	0.00277223	UP		NO
AT1G29920	-0.343843	12.5483	0.0019545	0.013898	DOWN		YES	1:10475907:G-GT;exonic_variant
AT1G29930	-0.354082	13.9421	0.00130747	0.00999699	DOWN		NO
AT1G29940	0.73781	4.92877	2.23756e-09	9.56385e-08	UP		NO
AT1G29950	0.467879	5.69087	1.76747e-05	0.00027345	UP		NO
AT1G30140	5.43739	-0.550366	8.70186e-17	1.2111e-14	UP		NO
AT1G30160	1.90588	-0.297894	1.31415e-07	3.77338e-06	UP		NO
AT1G30190	1.76979	-1.84199	0.00615819	0.0349064	UP		NO
AT1G30280	1.1054	1.12507	6.4104e-05	0.000808041	UP		NO
AT1G30320	-0.51497	4.26503	9.32523e-05	0.00110321	DOWN		NO
AT1G30360	-0.399415	7.82978	0.000287908	0.00287149	DOWN		NO
AT1G30370	3.04294	-0.394295	5.14627e-12	3.72756e-10	UP		NO
AT1G30420	0.997058	3.49121	3.56786e-09	1.46727e-07	UP		YES	1:10753957:C-T;intronic_variant
AT1G30475	0.569939	2.25735	0.00473639	0.0283049	UP		NO
AT1G30490	0.540621	5.13034	2.70545e-05	0.000391587	UP		NO
AT1G30510	0.413401	5.5062	0.00180394	0.0130355	UP		NO
AT1G30520	0.402297	5.01514	0.00254996	0.0171805	UP		NO
AT1G30530	0.812711	4.46603	4.46415e-08	1.43607e-06	UP		NO
AT1G30550	2.18001	0.1296	3.97412e-10	1.98594e-08	UP		NO
AT1G30560	3.11673	-2.4708	0.000793724	0.00659862	UP		NO
AT1G30590	-0.562412	5.67522	3.64343e-06	7.13456e-05	DOWN		NO
AT1G30630	0.286656	6.11426	0.00878162	0.0462652	UP		NO
AT1G30700	1.0879	3.23037	1.47631e-05	0.000236532	UP		NO
AT1G30730	1.46945	2.0948	4.82003e-07	1.19634e-05	UP		NO
AT1G30750	1.02185	3.0664	2.51031e-05	0.000367288	UP		NO
AT1G30755	0.63488	3.496	0.000166963	0.00182226	UP		YES	1:10908481:C-T;intronic_variant
AT1G30757	1.09315	0.455487	0.00222214	0.0154158	UP		NO
AT1G30814	4.76732	-3.28494	0.0056157	0.0323874	UP		NO
AT1G30850	1.1951	0.623992	0.00303865	0.0197959	UP		NO
AT1G30870	1.24605	4.71755	2.6896e-05	0.000389461	UP		NO
AT1G30900	1.06814	3.28064	3.36787e-06	6.67103e-05	UP		NO
AT1G30910	0.4018	5.00328	0.000461851	0.00423051	UP		NO
AT1G30960	1.1317	1.56499	0.000123587	0.00140342	UP		NO
AT1G30970	0.355422	5.71622	0.00222405	0.0154254	UP	YES	NO
AT1G31020	0.540463	3.37733	0.00100361	0.00803065	UP		NO
AT1G31190	-0.419092	5.12589	0.000886165	0.00724089	DOWN		NO
AT1G31290	-0.904072	3.84741	7.73278e-06	0.000136934	DOWN		YES	1:11191256:G-A;protein_coding;missense;GTT>ATT;V>I
AT1G31355	1.04301	1.09642	6.28866e-05	0.000795077	UP		NO
AT1G31410	0.695571	4.92379	3.4094e-07	8.83323e-06	UP		NO
AT1G31540	0.470629	4.89593	0.0066128	0.0369608	UP		NO
AT1G31550	1.84508	3.15866	9.95782e-17	1.37455e-14	UP		NO
AT1G31570	3.05191	-0.0575647	8.84463e-07	2.06729e-05	UP		NO
AT1G31580	1.70159	8.10186	3.00031e-16	3.9474e-14	UP		NO
AT1G31660	0.539953	4.29134	0.000219043	0.00228976	UP		NO
AT1G31690	2.10478	0.705481	1.67997e-07	4.6918e-06	UP		NO
AT1G31760	0.938848	1.54401	0.000222523	0.00231945	UP		NO
AT1G31817	0.47923	4.05209	0.00171803	0.0125235	UP		NO
AT1G31820	-0.454131	4.72801	0.000252115	0.00257786	DOWN		NO
AT1G31860	0.429588	4.02168	0.00737054	0.0404244	UP		NO
AT1G31910	0.455419	7.5684	8.53922e-06	0.00014933	UP		NO
AT1G31950	1.15349	2.91548	7.49209e-06	0.000133514	UP		NO
AT1G31970	0.3531	5.79467	0.00345868	0.0219668	UP		NO
AT1G32080	-0.5975	8.26778	2.09979e-07	5.72862e-06	DOWN		NO
AT1G32127	0.538328	2.75013	0.00404167	0.0249638	UP		NO
AT1G32210	0.364081	4.71583	0.00634722	0.0357433	UP		NO
AT1G32225	5.31595	-3.1001	0.000173344	0.00188518	UP		NO
AT1G32330	0.491576	3.39887	0.00222894	0.0154481	UP		YES	1:11660389:G-A;exonic_variant
AT1G32350	2.65154	2.42529	5.80279e-09	2.30205e-07	UP		NO
AT1G32385	0.834677	0.376909	0.00266021	0.0177528	UP		NO
AT1G32520	-0.367296	4.97766	0.00313593	0.020304	DOWN		NO
AT1G32560	-1.79295	0.177602	2.24856e-07	6.09281e-06	DOWN		NO
AT1G32740	-0.913169	2.82251	3.79746e-07	9.74122e-06	DOWN		NO
AT1G32830	3.81853	-1.93737	5.86244e-09	2.32298e-07	UP		YES	1:11892404:C-T;intronic_variant,1:11892982:TC-T;exonic_variant
AT1G32870	0.665876	3.65256	1.44572e-05	0.000232204	UP		NO
AT1G32920	0.875641	5.15814	0.00019898	0.00211816	UP		NO
AT1G32940	0.838514	3.62485	6.63948e-06	0.000120034	UP		NO
AT1G32960	4.81428	0.313065	8.68711e-18	1.40669e-15	UP		NO
AT1G33030	2.05554	0.117507	3.87582e-09	1.58424e-07	UP		NO
AT1G33090	2.18211	-0.805042	5.64083e-05	0.000732134	UP		NO
AT1G33100	2.61128	-1.62292	0.000501297	0.00452659	UP		NO
AT1G33230	0.382511	5.06642	0.00094065	0.0076049	UP		NO
AT1G33240	-0.389864	6.96478	0.00103877	0.00827161	DOWN		NO
AT1G33350	0.677937	1.58442	0.00562585	0.0324404	UP		NO
AT1G33410	0.566619	5.37552	6.40188e-06	0.000116175	UP		NO
AT1G33590	0.473136	6.50965	5.37646e-05	0.000703241	UP		NO
AT1G33615	-0.588443	1.89301	0.00612017	0.034726	DOWN		NO
AT1G33720	1.39647	1.33281	0.00239672	0.0163527	UP		NO
AT1G33730	5.00517	-3.18975	0.00103869	0.00827161	UP		NO
AT1G33750	1.1669	2.89479	2.98136e-05	0.000425307	UP		NO
AT1G33790	-0.860231	4.59933	3.01987e-05	0.000429748	DOWN		NO
AT1G33800	0.935316	4.31625	1.11886e-05	0.000187391	UP		NO
AT1G33840	10.3922	0.893125	2.9231e-52	4.28057e-49	UP		NO
AT1G33850	7.69203	-1.52668	3.77164e-12	2.79192e-10	UP		NO
AT1G33890	4.74827	-3.33667	0.00343305	0.0218373	UP		NO
AT1G33950	6.59322	-2.36203	4.26172e-06	8.13252e-05	UP		NO
AT1G33960	4.77395	1.69341	3.28852e-30	1.45737e-27	UP		NO
AT1G34000	-0.348123	7.51513	0.00297902	0.0194639	DOWN		NO
AT1G34030	0.341701	6.48093	0.0035185	0.0222323	UP		NO
AT1G34040	0.708416	1.74187	0.00807909	0.043399	UP		YES	1:12374769:G-A;intronic_variant,1:12374769:G-A;exonic_variant
AT1G34047	4.87886	-3.2373	0.00194248	0.0138348	UP		NO
AT1G34060	0.919868	2.15716	0.000589692	0.00515212	UP		NO
AT1G34065	0.624007	2.35655	0.00462791	0.0278145	UP		NO
AT1G34140	-2.67789	-1.76561	8.83608e-06	0.000153644	DOWN		NO
AT1G34210	-0.726021	5.0946	2.47003e-07	6.62365e-06	DOWN		NO
AT1G34245	0.726497	1.26412	0.00509508	0.0299594	UP		NO
AT1G34315	0.732319	3.04839	0.00019427	0.00207787	UP		NO
AT1G34320	0.442429	6.12041	2.30769e-05	0.0003418	UP		NO
AT1G34330	2.58624	1.40455	2.11866e-05	0.000319111	UP		NO
AT1G34418	0.595758	4.19075	0.00235287	0.0161268	UP		NO
AT1G34420	1.04923	1.32319	0.000517116	0.00463958	UP		NO
AT1G34510	1.92476	2.89607	1.72131e-05	0.000268033	UP		NO
AT1G34540	1.96219	-0.698081	0.00218276	0.015199	UP		NO
AT1G34760	-0.687326	3.68565	4.96708e-05	0.000657611	DOWN		NO
AT1G34780	0.431351	4.86421	0.000218084	0.00228185	UP		NO
AT1G35140	-1.6166	4.60861	3.17446e-07	8.32055e-06	DOWN		NO
AT1G35210	3.01558	-0.180978	0.000110157	0.00127674	UP		NO
AT1G35230	3.02131	-0.137843	1.95696e-09	8.45029e-08	UP		NO
AT1G35320	0.691317	4.43148	3.25856e-07	8.50064e-06	UP		NO
AT1G35420	-0.341978	6.4807	0.000678729	0.00578887	DOWN		NO
AT1G35510	0.440871	4.87057	0.000605564	0.00526349	UP		NO
AT1G35516	0.365816	6.20541	0.00221718	0.0153933	UP		NO
AT1G35612	-1.30695	4.79173	3.4136e-21	7.9292e-19	DOWN		NO
AT1G35620	-0.357139	5.85431	0.000831602	0.00685156	DOWN		NO
AT1G35710	4.88631	4.51022	2.57918e-64	7.23911e-61	UP		YES	1:13224690:G-GA;exonic_variant
AT1G35720	0.618647	8.04972	2.76899e-05	0.000399068	UP		NO
AT1G35730	3.99768	0.560163	8.14436e-28	3.04789e-25	UP		NO
AT1G35735	4.47918	-1.87897	4.30047e-09	1.73466e-07	UP		NO
AT1G35780	0.501057	4.73571	0.000835639	0.00687642	UP		NO
AT1G35910	1.88742	-0.762571	0.00465771	0.0279587	UP		NO
AT1G36020	4.75883	-3.23613	0.00389733	0.0242591	UP		NO
AT1G36050	0.332699	5.44997	0.00172435	0.0125652	UP		NO
AT1G36330	-6.47581	-2.46828	1.3713e-08	4.93977e-07	DOWN		NO
AT1G36622	3.72843	0.268865	1.50246e-13	1.39406e-11	UP		NO
AT1G36630	4.61645	-2.81187	0.00714067	0.0394788	UP		YES	1:13841967:C-T;exonic_variant,1:13841560:T-C;exonic_variant,1:13841603:G-C;exonic_variant,1:13841632:C-T;exonic_variant,1:13841558:A-G;exonic_variant,1:13841803:A-G;exonic_variant,1:13840979:C-T;exonic_variant,1:13841593:C-T;exonic_variant,1:13841464:A-G;exonic_variant,1:13841484:T-TAATTCG;exonic_variant,1:13841286:C-T;exonic_variant,1:13841991:T-G;exonic_variant,1:13841260:G-GAT;exonic_variant,1…
AT1G36675	4.88452	-0.512635	2.21918e-24	6.55652e-22	UP		NO
AT1G36680	5.57777	0.659996	4.58838e-44	4.06687e-41	UP		NO
AT1G37000	-4.63535	-1.1956	4.65301e-07	1.16432e-05	DOWN		NO
AT1G37150	-1.2372	0.601799	0.000124182	0.00140923	DOWN		NO
AT1G37999	3.66512	-2.82282	0.000274975	0.00276791	UP		NO
AT1G41830	0.591031	6.4854	9.50019e-07	2.2015e-05	UP		NO
AT1G41835	5.12735	-2.97315	0.00100551	0.00804053	UP		NO
AT1G41880	0.486332	6.46919	1.97309e-05	0.000300433	UP		NO
AT1G42540	-0.280255	5.6316	0.00873374	0.0460562	DOWN		NO
AT1G42560	-2.33843	0.395795	3.31442e-12	2.48073e-10	DOWN		YES	1:15982936:A-AAT;intronic_variant
AT1G42970	-0.436464	10.7448	2.80661e-05	0.000403454	DOWN		YES	1:16129351:CAGGTGAGAGAGATATAACACATTACATGATATCATTTTATGTTTTAACCTATGATTGTTTGTTTATGTTTTGTGTTTGCGTTTGCGTGTTCGTGTTTT-C;intronic_variant&splice_acceptor_region_variant&splice_donor_region_variant&splice_donor_variant,1:16127651:AAGGTATGAACTCCATCTGACTACTACATACCCTCTGTTTATGTGTGTGGTACAGTTTGTTTTATTGGTTTCTCTTGTTACTTACTTGCAC-A;intronic_variant&splice_acceptor_region_variant&splice_donor_region_variant&splice_d…
AT1G43020	0.795146	1.37513	0.0041328	0.0253685	UP		NO
AT1G43230	4.62156	-3.38796	0.0093612	0.0487017	UP		NO
AT1G43650	-0.756282	2.26047	0.000829526	0.00684115	DOWN		NO
AT1G43670	-0.423305	7.67429	0.00158006	0.0117117	DOWN		NO
AT1G43800	2.59064	4.54138	5.54122e-31	2.55663e-28	UP		NO
AT1G43860	0.457593	3.99376	0.00128825	0.00988145	UP		NO
AT1G43886	0.476086	3.35855	0.00271262	0.0180596	UP		NO
AT1G43910	2.00558	2.08343	3.87032e-11	2.41848e-09	UP		NO
AT1G44100	0.390081	5.12969	0.00146984	0.0110096	UP		NO
AT1G44130	3.24828	-0.526227	1.5156e-08	5.41901e-07	UP		NO
AT1G44170	0.598902	5.15016	1.17497e-06	2.65776e-05	UP		NO
AT1G44180	1.19285	0.582081	0.000527922	0.0047252	UP		NO
AT1G44740	1.03677	0.633413	0.00398526	0.0247014	UP		YES	1:16888645:C-T;protein_coding;missense;CGC>TGC;R>C,1:16888645:C-T;exonic_variant
AT1G44750	0.3208	4.99368	0.00848881	0.0450965	UP		NO
AT1G44780	0.584623	3.09174	0.00251092	0.0169615	UP		NO
AT1G44800	1.29441	4.07979	4.53912e-11	2.78982e-09	UP		YES	1:16915777:C-T;intronic_variant,1:16916845:C-T;intronic_variant,1:16916845:C-T;protein_coding;missense;AGC>AAC;S>N
AT1G44820	0.396521	5.4188	0.000279269	0.00280109	UP		NO
AT1G44830	1.40379	1.05756	9.11738e-07	2.12367e-05	UP		NO
AT1G44970	1.40839	2.27748	4.61791e-07	1.15726e-05	UP		YES	1:17002375:C-T;protein_coding;missense;CCA>TCA;P>S
AT1G45130	0.73696	5.94077	6.59975e-09	2.56681e-07	UP		NO
AT1G45145	0.764748	5.11191	0.00117478	0.00915287	UP		NO
AT1G45163	-0.942236	2.33134	4.82391e-06	9.08341e-05	DOWN		NO
AT1G45191	-0.629319	2.36861	0.00228807	0.0157725	DOWN		YES	1:17119031:C-T;exonic_variant,1:17119031:C-T;protein_coding;sense;TCC>TCT;S>S
AT1G45201	0.454187	6.43986	0.000793848	0.00659862	UP		YES	1:17124016:C-T;protein_coding;missense;CCT>CTT;P>L
AT1G45231	-0.601507	2.70769	0.00137088	0.010418	DOWN		NO
AT1G45332	0.604335	4.75416	6.83564e-05	0.000852708	UP		NO
AT1G46552	2.37047	-0.891206	1.34812e-08	4.86666e-07	UP		NO
AT1G46768	-1.08842	3.09835	1.06527e-08	3.95147e-07	DOWN		NO
AT1G47210	0.678243	4.0611	8.20865e-05	0.000991663	UP		NO
AT1G47260	0.319492	6.45777	0.0017943	0.0129742	UP		NO
AT1G47278	0.619329	4.20928	1.86388e-05	0.000286002	UP		NO
AT1G47410	0.606143	2.65791	0.00255085	0.0171806	UP		NO
AT1G47420	0.363735	6.98267	0.000209835	0.00221411	UP		NO
AT1G47480	0.632931	2.54875	0.00835913	0.0445622	UP		NO
AT1G47578	0.967581	0.700213	0.000342101	0.00332246	UP		NO
AT1G47600	1.14122	3.51508	4.33375e-05	0.000587385	UP		NO
AT1G47640	0.347245	4.90807	0.00782614	0.0423669	UP		NO
AT1G47820	0.52041	2.61811	0.00742439	0.0406735	UP		NO
AT1G47830	0.340099	4.79833	0.00470717	0.0281652	UP		NO
AT1G47840	0.66086	1.48669	0.00411464	0.0253124	UP		NO
AT1G47860	0.569652	3.48507	0.00218573	0.0152134	UP		YES	1:17624941:C-T;exonic_variant,1:17626745:C-T;exonic_variant
AT1G47890	3.41916	-1.29952	4.25495e-08	1.37932e-06	UP		NO
AT1G47950	-2.07808	-2.06981	0.00574096	0.0330025	DOWN		NO
AT1G47960	-0.519629	5.34869	0.000444394	0.00410297	DOWN		NO
AT1G47990	-1.12778	-0.577892	0.00876193	0.0461687	DOWN		NO
AT1G48030	-0.423239	8.22324	4.35977e-05	0.000589962	DOWN		NO
AT1G48050	0.947897	4.91619	1.91512e-15	2.31194e-13	UP		NO
AT1G48170	0.426389	3.53667	0.00722459	0.0398056	UP		NO
AT1G48210	0.508996	4.13185	0.000287898	0.00287149	UP		NO
AT1G48230	0.692068	5.37013	5.09901e-08	1.61107e-06	UP		NO
AT1G48240	-0.429771	3.95134	0.00326787	0.0210168	DOWN		YES	1:17811701:C-T;exonic_variant
AT1G48260	1.22466	3.01557	2.02227e-07	5.54206e-06	UP		NO
AT1G48270	0.810801	2.95789	9.83118e-06	0.00016834	UP		NO
AT1G48360	0.785751	4.0331	9.31336e-08	2.79078e-06	UP		NO
AT1G48470	1.44424	-1.36122	0.00796468	0.0429076	UP		NO
AT1G48510	1.101	-0.0727176	0.00589413	0.0336874	UP		NO
AT1G48540	-0.338621	6.1327	0.00145324	0.0109111	DOWN		NO
AT1G48570	0.844376	3.94547	0.000495483	0.00448371	UP		NO
AT1G48580	-0.97707	0.59043	0.00483729	0.028765	DOWN		NO
AT1G48605	1.20367	0.928659	2.50597e-06	5.15598e-05	UP		NO
AT1G48620	-0.320998	6.47151	0.00222444	0.0154254	DOWN		NO
AT1G48630	0.526021	5.67568	0.000270012	0.00273594	UP	YES	NO
AT1G48635	0.538702	4.78187	1.58564e-05	0.000250271	UP		NO
AT1G48640	1.9519	-0.0348023	4.50168e-05	0.000605773	UP		NO
AT1G48750	-0.493053	4.92256	0.00611989	0.034726	DOWN		NO
AT1G48920	0.329557	7.66076	0.00586123	0.033545	UP		NO
AT1G48930	1.17048	4.10181	7.88477e-05	0.000960807	UP		NO
AT1G48953	5.8616	-2.78727	1.15242e-05	0.000191868	UP		NO
AT1G48970	0.486256	4.43152	6.29543e-05	0.000795633	UP		NO
AT1G49000	1.16712	1.35741	0.000110893	0.00128218	UP		NO
AT1G49005	3.49153	-2.71904	0.00149848	0.0111957	UP		NO
AT1G49050	0.563328	4.6257	2.30397e-05	0.000341549	UP		NO
AT1G49160	0.864923	3.28883	2.22866e-07	6.04864e-06	UP		NO
AT1G49240	0.260905	7.97072	0.00680094	0.0378303	UP		NO
AT1G49320	-0.747602	3.4636	0.00199318	0.0141182	DOWN		NO
AT1G49380	-0.42304	5.82819	0.000577721	0.00507916	DOWN		NO
AT1G49390	1.14406	0.0796979	0.000202784	0.00215168	UP		NO
AT1G49400	0.394738	3.90058	0.00527135	0.0308505	UP		NO
AT1G49410	0.886228	3.86084	7.9034e-08	2.40031e-06	UP		NO
AT1G49475	1.20405	-0.412472	0.00101204	0.00808314	UP		NO
AT1G49480	0.306639	5.5206	0.00751258	0.0410699	UP		NO
AT1G49500	-0.421845	7.17366	0.000424072	0.00395327	DOWN		NO
AT1G49600	0.517682	6.30051	4.44589e-05	0.000599448	UP		NO
AT1G49630	0.394098	5.04348	0.00187997	0.0134837	UP		NO
AT1G49640	2.01489	0.896664	2.11861e-06	4.44037e-05	UP		NO
AT1G49750	0.762047	6.20031	1.60522e-11	1.06428e-09	UP		NO
AT1G49790	-2.37464	-0.181862	5.8693e-11	3.54272e-09	DOWN		NO
AT1G49960	0.799989	1.30315	0.0010381	0.00827161	UP		NO
AT1G50010	0.435432	8.04947	0.00281724	0.0186273	UP		NO
AT1G50040	-2.38489	2.40613	4.37733e-08	1.41354e-06	DOWN		NO
AT1G50110	1.10319	2.7364	2.78286e-05	0.000400895	UP		NO
AT1G50180	0.59265	1.50962	0.00664821	0.0371156	UP		NO
AT1G50250	-0.343723	8.1398	0.00374451	0.0234642	DOWN		NO
AT1G50280	-0.518769	3.0751	0.00801403	0.0431249	DOWN		NO
AT1G50360	0.449167	4.90451	0.00017937	0.00194222	UP		NO
AT1G50430	0.341596	6.10784	0.000808409	0.00670146	UP		NO
AT1G50440	0.475874	4.65832	0.00029695	0.0029451	UP		NO
AT1G50520	0.576715	2.24474	0.00362895	0.0228419	UP		YES	1:18719574:T-A;protein_coding;missense;CTC>CAC;L>H
AT1G50560	0.700692	2.59362	0.00154421	0.0114814	UP		NO
AT1G50580	1.6536	-0.281286	1.59806e-05	0.000251923	UP		NO
AT1G50600	-0.314524	5.87835	0.00817423	0.0437496	DOWN		NO
AT1G50930	1.4489	0.0942241	0.00201561	0.0142501	UP		NO
AT1G50950	0.556905	2.4376	0.0030762	0.0200096	UP		NO
AT1G51035	1.68406	-2.037	0.0037791	0.0236543	UP		NO
AT1G51060	0.532845	6.0582	0.000161051	0.00176516	UP		NO
AT1G51110	-0.684503	6.97716	8.38347e-11	4.87675e-09	DOWN		NO
AT1G51190	1.13095	0.169529	0.00318538	0.020553	UP		NO
AT1G51220	4.7573	-3.28532	0.00401694	0.0248429	UP		NO
AT1G51310	0.432011	4.54585	0.00341124	0.0217355	UP		NO
AT1G51380	1.07426	1.02769	8.73347e-05	0.00104532	UP		NO
AT1G51420	0.95005	2.59808	0.00032212	0.00315663	UP		NO
AT1G51470	1.14529	3.43219	5.89292e-05	0.000756977	UP		NO
AT1G51570	-0.260591	6.73472	0.0079584	0.0428875	DOWN		NO
AT1G51590	0.383679	5.12406	0.000455393	0.0041802	UP		NO
AT1G51620	1.35505	-0.403267	0.000941022	0.00760609	UP		NO
AT1G51650	0.984259	6.58285	2.88587e-14	2.91889e-12	UP		NO
AT1G51760	0.698181	5.13865	0.00022965	0.00238288	UP		NO
AT1G51790	0.838695	2.15626	0.000810057	0.00671211	UP		NO
AT1G51800	1.22641	3.54848	5.47845e-07	1.34099e-05	UP		NO
AT1G51820	1.70856	0.266918	0.00295425	0.0193434	UP		NO
AT1G51890	2.65805	1.62226	9.8477e-15	1.08039e-12	UP		NO
AT1G51920	4.88722	-3.14333	0.00186724	0.0134205	UP		NO
AT1G51940	-0.656405	5.08228	6.75088e-05	0.000844324	DOWN		NO
AT1G51980	0.266811	7.12708	0.00900658	0.0472509	UP		NO
AT1G52000	0.725867	5.46362	0.001231	0.00949461	UP		NO
AT1G52030	2.31038	1.41936	1.35999e-10	7.6343e-09	UP		NO
AT1G52040	4.58542	1.88731	1.80929e-16	2.42783e-14	UP		NO
AT1G52100	0.487424	6.16893	0.000498251	0.00450633	UP		YES	1:19383685:A-AC;splice_donor_variant,1:19383685:A-AC;exonic_variant&protein_coding
AT1G52120	3.60408	-1.13407	1.73418e-06	3.74417e-05	UP		NO
AT1G52160	0.550317	3.17466	0.00339086	0.0216389	UP		NO
AT1G52190	0.60079	5.97602	0.00200461	0.0141878	UP		NO
AT1G52200	0.733739	3.607	0.00541273	0.0314647	UP		NO
AT1G52260	0.544262	3.39232	0.000927004	0.00751804	UP		NO
AT1G52300	0.41668	7.55948	0.00217328	0.015153	UP		YES	1:19475467:T-TAAGTCCTCTTGCGAGCGGCGGGATAAGCACAAGCAGAGCAACGACTCTTCTGGATGTGGAAA;intronic_variant&splice_acceptor_region_variant&splice_acceptor_variant
AT1G52310	1.27284	5.4517	1.34122e-22	3.37116e-20	UP		NO
AT1G52330	0.886264	0.983606	0.000714261	0.00603993	UP		NO
AT1G52400	1.3592	6.17223	1.31162e-05	0.00021331	UP		NO
AT1G52410	1.06142	4.15956	0.000490819	0.00444873	UP		NO
AT1G52420	0.279015	5.78863	0.00545768	0.0316644	UP		NO
AT1G52500	0.662099	3.6761	0.000762733	0.00637934	UP		NO
AT1G52565	1.11176	3.53716	3.09554e-11	1.98592e-09	UP		NO
AT1G52600	0.451018	4.85513	0.000103948	0.00121397	UP		NO
AT1G52810	3.22097	-3.14341	0.00602972	0.0343459	UP		NO
AT1G52880	0.529314	3.73185	0.00212231	0.0148395	UP		NO
AT1G52890	-0.616452	5.29992	0.000378262	0.00361086	DOWN		NO
AT1G52930	0.648826	3.92373	1.7121e-05	0.000266845	UP		NO
AT1G52940	9.416	-0.000737122	3.61498e-05	0.000502502	UP		YES	1:19718935:G-GA;intronic_variant
AT1G53030	0.478943	3.23217	0.0052711	0.0308505	UP		YES	1:19760540:G-GA;intronic_variant
AT1G53035	0.723328	1.39712	0.00401936	0.0248533	UP		NO
AT1G53070	0.813663	1.93979	0.0014458	0.0108721	UP		NO
AT1G53160	-0.980224	1.64601	0.000437378	0.0040504	DOWN		NO
AT1G53210	-0.263264	8.0309	0.0062718	0.0353955	DOWN		NO
AT1G53250	0.411992	3.66269	0.00772703	0.0419629	UP		NO
AT1G53270	0.939239	0.496778	0.00233989	0.0160509	UP		NO
AT1G53310	0.771584	6.98703	1.55977e-06	3.41578e-05	UP		NO
AT1G53350	0.546067	3.5096	0.000697771	0.00592428	UP		NO
AT1G53390	0.336381	5.04336	0.00398821	0.0247074	UP		NO
AT1G53440	1.21662	5.89374	5.0801e-19	9.2488e-17	UP		NO
AT1G53480	0.322082	5.12865	0.00622849	0.0352042	UP		NO
AT1G53490	0.549172	4.05826	0.000214355	0.00225001	UP		NO
AT1G53542	1.69379	-1.5895	0.00349296	0.0221182	UP		NO
AT1G53580	-0.315743	6.91058	0.00617849	0.0350038	DOWN		NO
AT1G53620	4.25733	-1.08036	9.39234e-07	2.18469e-05	UP		NO
AT1G53625	3.3706	-0.186907	1.00214e-06	2.30869e-05	UP		NO
AT1G53645	0.662842	3.97533	6.97453e-05	0.000866707	UP		NO
AT1G53670	-0.289574	6.48461	0.00331984	0.0212698	DOWN		NO
AT1G53680	0.751152	1.69197	0.00365586	0.0229897	UP		NO
AT1G53700	0.932009	1.62946	0.000121864	0.00138712	UP		NO
AT1G53710	0.371353	4.11221	0.00807412	0.0433861	UP		NO
AT1G53980	2.44637	-1.97395	0.00100448	0.00803418	UP		NO
AT1G53990	0.735396	0.709025	0.0071451	0.0394875	UP		NO
AT1G54000	1.52541	5.43937	2.47496e-11	1.59692e-09	UP		NO
AT1G54010	0.8949	5.77866	4.07074e-06	7.8168e-05	UP		NO
AT1G54020	2.94322	-0.121297	1.12042e-05	0.000187426	UP		NO
AT1G54030	0.68939	6.07327	1.77462e-08	6.26531e-07	UP		NO
AT1G54100	-0.675781	8.39702	4.17774e-10	2.07785e-08	DOWN		NO
AT1G54120	-1.29297	1.88057	7.26671e-07	1.72968e-05	DOWN		NO
AT1G54160	0.561208	2.28089	0.0049296	0.0292045	UP		NO
AT1G54170	0.818242	5.55327	2.93664e-12	2.23271e-10	UP		NO
AT1G54200	0.849943	1.73784	0.00219307	0.015255	UP		NO
AT1G54220	0.349464	4.655	0.0077811	0.0422089	UP		NO
AT1G54340	0.669655	5.08495	4.47295e-09	1.79563e-07	UP		NO
AT1G54370	0.565945	5.69254	3.5294e-07	9.10909e-06	UP		NO
AT1G54390	-0.470761	4.462	0.000164517	0.00179789	DOWN		NO
AT1G54450	0.782222	2.14181	0.000165361	0.00180653	UP		NO
AT1G54460	0.666825	4.81217	1.41919e-06	3.14679e-05	UP		NO
AT1G54510	0.435429	4.47544	0.00164804	0.0120913	UP		NO
AT1G54530	1.1593	0.441197	0.00170868	0.012466	UP		NO
AT1G54540	0.833812	1.21896	0.000654792	0.00560743	UP		NO
AT1G54570	0.48888	3.79417	0.00621877	0.035167	UP		NO
AT1G54575	-0.433543	5.65576	0.00176002	0.0127812	DOWN		NO
AT1G54580	0.675367	6.01513	8.07311e-08	2.44744e-06	UP		NO
AT1G54710	0.476171	5.25103	2.6418e-05	0.000383363	UP		NO
AT1G54740	-0.57902	5.83147	2.60035e-05	0.000378817	DOWN		NO
AT1G54890	1.06789	1.2027	4.74218e-05	0.000633312	UP		NO
AT1G54940	1.17652	0.971497	0.000340986	0.00331484	UP		NO
AT1G54970	1.36304	4.37765	0.000205418	0.00217501	UP		NO
AT1G54990	0.331023	4.67315	0.00756242	0.0412686	UP		NO
AT1G55020	0.637869	5.6754	0.000237613	0.00245643	UP		NO
AT1G55120	1.05429	2.07706	4.76945e-06	9.00952e-05	UP		NO
AT1G55205	1.10648	1.2488	9.19375e-05	0.00108932	UP		NO
AT1G55210	0.527756	4.84806	0.000265162	0.00269409	UP		YES	1:20598394:C-T;protein_coding;missense;GGA>GAA;G>E
AT1G55265	1.41106	2.92677	2.97345e-09	1.24254e-07	UP		NO
AT1G55330	-0.613715	5.19244	1.11734e-07	3.27531e-06	DOWN		NO
AT1G55380	1.53728	-1.10063	0.00127309	0.00978076	UP		NO
AT1G55420	0.886188	0.0710815	0.00549135	0.0318118	UP		NO
AT1G55450	1.05762	5.30895	4.49648e-05	0.000605542	UP		NO
AT1G55500	1.45998	5.14669	1.4305e-34	7.52824e-32	UP		NO
AT1G55520	0.530002	4.82583	1.4844e-05	0.000237398	UP		NO
AT1G55535	0.539528	3.48269	0.000371847	0.00356168	UP		NO
AT1G55545	1.90152	-2.00949	0.0053827	0.0313442	UP		YES	1:20739180:C-T;intronic_variant
AT1G55620	0.358798	4.46465	0.00407079	0.0250835	UP		YES	1:20787485:T-TA;intronic_variant,1:20787495:A-AT;splice_donor_region_variant
AT1G55650	4.15147	-1.93639	1.63742e-07	4.57675e-06	UP		NO
AT1G55670	-0.415628	10.7916	1.50898e-05	0.000240643	DOWN		NO
AT1G55700	3.42868	-2.82134	0.00889622	0.0467742	UP		NO
AT1G55730	0.840929	4.16028	1.01038e-10	5.78754e-09	UP		NO
AT1G55775	2.85164	-1.97341	0.000105992	0.00123569	UP		NO
AT1G55840	0.314125	6.00325	0.00377891	0.0236543	UP		NO
AT1G55850	0.38149	6.06749	0.00109953	0.00866886	UP		NO
AT1G55870	0.638832	3.81598	3.48169e-05	0.000486243	UP		NO
AT1G55920	0.610734	6.38514	3.50516e-06	6.90797e-05	UP		NO
AT1G56045	0.572676	4.93343	0.00244845	0.0166162	UP		NO
AT1G56060	3.35365	-1.76904	1.95931e-05	0.000298739	UP		NO
AT1G56080	0.824107	1.41626	0.000833637	0.00686497	UP		NO
AT1G56090	-1.866	2.97414	8.28592e-25	2.51422e-22	DOWN		NO
AT1G56100	5.91962	-2.75306	4.17031e-06	7.97713e-05	UP		NO
AT1G56110	0.716344	5.86056	8.72428e-06	0.000152329	UP		NO
AT1G56120	1.08771	2.12942	7.36526e-06	0.000131532	UP		NO
AT1G56130	0.593439	2.03907	0.00952838	0.0494035	UP		NO
AT1G56145	0.615673	4.22541	2.12229e-05	0.000319254	UP		NO
AT1G56150	1.61062	1.78175	3.04838e-09	1.2707e-07	UP		NO
AT1G56230	0.65516	5.13579	1.08476e-07	3.18811e-06	UP		YES	1:21046747:C-T;protein_coding;missense;GGT>GAT;G>D,1:21046747:C-T;exonic_variant
AT1G56240	2.97374	-0.537731	3.77228e-07	9.6988e-06	UP		NO
AT1G56250	3.66103	-1.50302	5.2631e-07	1.29203e-05	UP		YES	1:21062238:A-AAT;intronic_variant
AT1G56280	0.380361	9.25456	0.00156118	0.0115947	UP		YES	1:21073222:AACCTACACACAGTTGAATCAAGATTCCGATGAAAATGTGTCTGTGTAGGTTCTTTTACACAACTAACAGAGCTTCATATAT-A;intronic_variant&splice_acceptor_region_variant&splice_donor_region_variant&splice_acceptor_variant,1:21073925:T-TA;exonic_variant&protein_coding,1:21073925:T-TA;exonic_variant,1:21073477:GCTGAACAAGTTCAATGCTAATCAAAAACTAAACCTTCAAAAAACTCTATAATCTAATAAAGAAAGCTAATATAGAATCTATAC-G;intronic_variant&splice_acce…
AT1G56300	-0.661188	4.59294	0.000239653	0.00247145	DOWN		NO
AT1G56580	0.460292	6.43238	0.000782215	0.00652113	UP		NO
AT1G56600	0.971317	4.6342	1.16519e-05	0.000193164	UP		NO
AT1G56630	0.995096	0.97339	3.61011e-05	0.000502031	UP		NO
AT1G57570	1.14987	0.280673	0.00294356	0.0192846	UP		NO
AT1G57630	5.38548	-0.763795	4.44677e-11	2.73805e-09	UP		NO
AT1G57660	0.494667	6.98661	2.51716e-05	0.000368131	UP		NO
AT1G57680	-0.452223	6.29541	0.000865251	0.00709063	DOWN		NO
AT1G57770	-0.644117	5.81578	5.22385e-08	1.64434e-06	DOWN		NO
AT1G57870	0.30173	5.17905	0.00603367	0.0343567	UP		YES	1:21433316:C-T;intronic_variant
AT1G57980	-0.801207	2.76116	0.000307173	0.00303221	DOWN		NO
AT1G58030	-0.277591	7.14717	0.0039071	0.0243064	DOWN		NO
AT1G58050	4.66867	-3.16686	0.00891298	0.0468255	UP		NO
AT1G58080	0.504757	6.94899	2.82861e-07	7.50751e-06	UP		NO
AT1G58110	0.432025	4.57175	0.000906959	0.00738749	UP		NO
AT1G58130	5.57248	-2.89693	3.88876e-05	0.000535914	UP		NO
AT1G58225	2.15615	-1.68453	0.00349446	0.0221194	UP		NO
AT1G58270	-0.61843	6.47127	5.41976e-05	0.000708079	DOWN		NO
AT1G58280	1.48485	3.69555	1.2808e-08	4.67372e-07	UP		NO
AT1G58290	-0.47026	8.81631	0.00191616	0.0136849	DOWN		NO
AT1G58330	2.17289	-2.14603	0.000355289	0.00342719	UP		NO
AT1G58360	-0.571203	7.2666	4.29145e-06	8.18462e-05	DOWN		NO
AT1G58370	0.897573	2.40678	8.95329e-05	0.00106632	UP		NO
AT1G58410	1.0805	1.28609	6.52083e-05	0.000818286	UP		NO
AT1G58420	1.64062	-1.28611	0.00332578	0.0212998	UP		NO
AT1G58590	-0.97045	1.09271	0.000368529	0.00353732	DOWN		NO
AT1G58602	1.52499	6.5536	6.05166e-21	1.3772e-18	UP		YES	1:21752770:A-AC;exonic_variant,1:21763990:T-A;intronic_variant,1:21765160:G-A;protein_coding;sense;GGG>GGA;G>G,1:21765160:G-A;exonic_variant,1:21752770:A-AC;intronic_variant
AT1G58643	4.98538	-1.4076	6.86462e-14	6.66304e-12	UP		NO
AT1G58889	-5.95266	-2.58628	0.00401552	0.0248387	DOWN		NO
AT1G59560	0.579632	2.49392	0.00217936	0.0151785	UP		NO
AT1G59590	1.29145	3.07683	1.14548e-08	4.22109e-07	UP		NO
AT1G59725	1.86494	0.0741129	8.49828e-06	0.000148769	UP		NO
AT1G59780	1.64593	0.0871089	5.68429e-05	0.000735507	UP		NO
AT1G59850	1.11608	1.10395	0.00258914	0.0173749	UP		NO
AT1G59870	0.539234	8.27179	0.0073629	0.0403958	UP		NO
AT1G59920	5.65879	-0.80114	2.18314e-20	4.68345e-18	UP		NO
AT1G59930	6.37624	0.882567	2.90966e-32	1.44118e-29	UP		NO
AT1G59940	1.65382	1.72569	9.15774e-09	3.45013e-07	UP		NO
AT1G59950	5.54901	-1.03025	4.00088e-07	1.02163e-05	UP		NO
AT1G59960	1.31452	3.98355	3.58562e-17	5.20548e-15	UP		NO
AT1G59970	0.803286	2.27248	9.93864e-05	0.00116639	UP		NO
AT1G59990	0.937769	5.29202	1.16429e-08	4.27637e-07	UP		NO
AT1G60050	3.30697	-1.37477	2.45083e-05	0.000359837	UP		NO
AT1G60080	0.743992	2.7611	0.000145858	0.00162348	UP		NO
AT1G60095	0.678558	0.895681	0.00719759	0.0397283	UP		NO
AT1G60110	4.14818	1.54773	2.53041e-28	9.79619e-26	UP		YES	1:22170154:G-T;exonic_variant
AT1G60130	1.81869	-0.761693	1.16461e-05	0.000193164	UP		NO
AT1G60140	-0.318358	6.69988	0.00537481	0.0313036	DOWN		NO
AT1G60160	-0.313049	6.13934	0.00431688	0.0263114	DOWN		NO
AT1G60200	0.34074	7.34178	0.00292254	0.019177	UP	YES	NO
AT1G60260	0.673559	4.89725	1.0166e-07	3.0194e-06	UP		NO
AT1G60390	1.02024	2.19977	1.14313e-06	2.59097e-05	UP		NO
AT1G60640	0.687654	3.86915	0.000219338	0.00229142	UP		NO
AT1G60690	-0.576909	3.53596	0.000542215	0.00483131	DOWN		NO
AT1G60730	1.03896	4.23649	8.69343e-09	3.28623e-07	UP		NO
AT1G60770	0.408289	4.28049	0.00667724	0.0372468	UP		NO
AT1G60787	3.00909	-0.898966	1.10926e-08	4.10427e-07	UP		NO
AT1G60810	0.376101	4.61448	0.00310399	0.0201514	UP		NO
AT1G60850	0.540217	3.03872	0.00339094	0.0216389	UP		NO
AT1G60950	-0.506343	9.31231	0.00039332	0.00372642	DOWN		NO
AT1G60960	-0.431091	4.9898	0.00195121	0.0138852	DOWN		NO
AT1G60989	0.878881	3.58418	2.40447e-07	6.46329e-06	UP		NO
AT1G60995	0.298445	4.66368	0.0096189	0.0497962	UP		NO
AT1G61080	1.34984	0.450618	0.00284993	0.0187844	UP		NO
AT1G61100	-0.546811	6.70589	0.00013957	0.00155968	DOWN		NO
AT1G61120	5.48522	-0.0758357	1.81582e-07	5.02537e-06	UP		NO
AT1G61210	1.83347	6.27721	7.9265e-62	1.90694e-58	UP		NO
AT1G61215	0.495127	2.45179	0.00842733	0.044869	UP		NO
AT1G61230	1.47283	-1.39096	0.00189555	0.0135579	UP		NO
AT1G61340	0.668488	2.36255	0.00141162	0.0106579	UP		NO
AT1G61360	0.964385	3.81518	2.00754e-08	7.01411e-07	UP		NO
AT1G61400	0.807274	2.40853	0.000590373	0.00515673	UP		YES	1:22658172:CA-C;exonic_variant
AT1G61420	1.04404	2.3947	4.28883e-07	1.08938e-05	UP		YES	1:22661893:C-T;protein_coding;missense;ATG>ATA;M>I
AT1G61430	0.830452	3.41653	1.00121e-05	0.000171263	UP		NO
AT1G61440	1.44779	-0.70566	0.000277483	0.00278567	UP		NO
AT1G61480	0.822983	0.88304	0.00247809	0.0167768	UP		NO
AT1G61520	-0.386464	12.0576	0.000185392	0.00199681	DOWN		YES	1:22700442:GGCAGGTAATGTTCAAACAACTTTTGGAATTTTATTTGTTTTGAGAACTTCATGATGTTCAAAATTTGGAGATGTTCTGATTCTTCTT-G;intronic_variant&splice_donor_region_variant&splice_acceptor_region_variant&exonic_variant&splice_donor_variant&protein_coding,1:22700442:GGCAGGTAATGTTCAAACAACTTTTGGAATTTTATTTGTTTTGAGAACTTCATGATGTTCAAAATTTGGAGATGTTCTGATTCTTCTT-G;exonic_variant,1:22700442:GGCAGGTAATGTTCAAACAACTTTTGGAATTTTATTTGTTTT…
AT1G61570	0.839562	3.78354	1.22142e-07	3.54854e-06	UP		NO
AT1G61580	0.476896	4.20432	0.00192962	0.0137694	UP		NO
AT1G61590	0.483411	4.17654	0.00498785	0.0294937	UP		YES	1:22724685:G-GA;intronic_variant
AT1G61640	0.860212	2.46861	1.48652e-05	0.000237625	UP		NO
AT1G61740	-0.577157	6.2598	5.47631e-08	1.7142e-06	DOWN		NO
AT1G61750	-2.32348	-0.72983	2.79617e-08	9.3896e-07	DOWN		NO
AT1G61770	0.39619	4.89757	0.00246999	0.0167354	UP		NO
AT1G61790	0.343086	6.46214	0.000903569	0.00736522	UP		NO
AT1G61800	0.856089	3.1458	0.00629783	0.0355305	UP		NO
AT1G61850	0.318363	5.61981	0.00260307	0.0174372	UP		NO
AT1G61860	0.842633	0.690099	0.00541739	0.0314808	UP		NO
AT1G61900	-0.456113	5.2238	0.000295175	0.00293268	DOWN		NO
AT1G61920	3.39616	-2.39013	7.27779e-05	0.000896901	UP		NO
AT1G61970	0.658505	3.89577	8.70505e-05	0.00104229	UP		NO
AT1G62045	1.07348	0.859742	0.000274641	0.00276537	UP		NO
AT1G62130	2.08818	4.50732	3.47324e-53	5.57058e-50	UP		NO
AT1G62180	0.406507	7.03497	0.00153909	0.0114534	UP		NO
AT1G62280	-2.13843	-0.843556	2.82556e-06	5.72609e-05	DOWN		NO
AT1G62290	-0.59556	5.16189	5.65175e-07	1.3814e-05	DOWN		NO
AT1G62300	0.776739	4.38094	4.46365e-06	8.47942e-05	UP		NO
AT1G62305	0.650064	3.0638	0.000149802	0.00166024	UP		NO
AT1G62310	0.603826	5.51621	1.06414e-07	3.13571e-06	UP		NO
AT1G62320	1.28576	1.41705	0.000183151	0.00197905	UP		NO
AT1G62350	0.862153	0.610957	0.00348984	0.0221025	UP		NO
AT1G62360	-1.40969	0.826699	0.00347302	0.0220275	DOWN		NO
AT1G62370	0.81582	2.36102	4.56473e-05	0.000612529	UP		NO
AT1G62480	0.57144	6.47468	0.00139495	0.0105604	UP		NO
AT1G62510	-1.43372	9.03401	1.33247e-22	3.37116e-20	DOWN		NO
AT1G62520	-0.559299	2.37115	0.00800104	0.0430622	DOWN		NO
AT1G62540	1.55339	4.42335	4.69303e-16	6.01011e-14	UP		NO
AT1G62560	1.07867	3.92783	1.25116e-06	2.81309e-05	UP		NO
AT1G62570	0.55126	5.08693	0.000328872	0.00321251	UP		NO
AT1G62610	0.402528	4.10761	0.00662641	0.0370246	UP		NO
AT1G62730	0.85995	2.21069	6.18011e-05	0.000784888	UP		NO
AT1G62770	-0.539663	4.3681	0.00412509	0.0253257	DOWN		NO
AT1G62780	0.298871	6.07109	0.00720716	0.039755	UP		NO
AT1G62800	0.726889	4.14036	1.7847e-05	0.000275737	UP		NO
AT1G62820	0.382231	4.14802	0.00819429	0.0438391	UP		NO
AT1G62840	0.817862	1.31546	0.00104801	0.00832896	UP		NO
AT1G62960	-0.274371	5.96317	0.00924617	0.0482448	DOWN		NO
AT1G62975	0.631103	3.77454	4.5181e-05	0.000607482	UP		NO
AT1G62980	1.44983	3.5999	1.01467e-05	0.000173125	UP		NO
AT1G62990	0.721694	2.30589	0.000903819	0.00736548	UP		NO
AT1G63000	0.485857	6.0039	0.000142585	0.00158915	UP		NO
AT1G63020	0.62377	3.02289	0.00103898	0.00827161	UP		NO
AT1G63055	-1.2492	0.541511	0.00119898	0.00929198	DOWN		NO
AT1G63130	-0.444281	3.69094	0.0038901	0.024223	DOWN		NO
AT1G63180	-1.13792	3.60147	8.99588e-12	6.22156e-10	DOWN		NO
AT1G63220	0.795825	3.66812	0.000283658	0.00283738	UP		NO
AT1G63250	0.673632	2.15701	0.00632276	0.0356473	UP		NO
AT1G63350	1.04227	2.22478	7.27359e-05	0.000896712	UP		NO
AT1G63410	1.05895	0.0555352	0.000337069	0.00328496	UP		NO
AT1G63420	0.526478	4.56148	0.00144971	0.0108941	UP		NO
AT1G63460	0.467528	4.12204	0.000754019	0.00631744	UP		NO
AT1G63600	6.19551	0.345902	2.54162e-18	4.30173e-16	UP		NO
AT1G63610	-0.428058	5.33359	0.000612843	0.00531031	DOWN		NO
AT1G63710	1.18032	0.00502915	0.00318961	0.0205724	UP		NO
AT1G63770	-0.312517	8.47055	0.00669615	0.0373461	DOWN		NO
AT1G63780	0.71113	3.97484	1.39041e-06	3.08705e-05	UP		NO
AT1G63800	-0.612031	5.44294	2.66339e-07	7.10822e-06	DOWN		NO
AT1G63810	0.546145	4.04448	0.000981988	0.00789552	UP		NO
AT1G63930	1.10038	0.514574	0.00132675	0.0101168	UP		NO
AT1G63940	0.326524	6.39766	0.00758306	0.0413556	UP		NO
AT1G64090	0.49437	6.20989	1.43462e-06	3.1789e-05	UP		NO
AT1G64100	1.9742	-1.51846	0.000299324	0.00296341	UP		NO
AT1G64110	-1.20346	6.36926	2.74148e-13	2.44923e-11	DOWN		NO
AT1G64150	-0.364218	4.88986	0.00206672	0.0145352	DOWN		NO
AT1G64160	5.42867	-3.01425	0.0021338	0.0149105	UP		NO
AT1G64170	0.778139	3.03896	0.000146902	0.00163283	UP		NO
AT1G64320	0.934326	0.432143	0.00932023	0.048556	UP		NO
AT1G64360	2.40931	2.41	1.18813e-18	2.08424e-16	UP		NO
AT1G64390	0.468524	6.06378	0.00609979	0.0346395	UP		NO
AT1G64400	1.2273	3.67446	1.06908e-09	4.91909e-08	UP		NO
AT1G64405	1.15502	0.184339	0.000697506	0.00592353	UP		NO
AT1G64440	0.589941	4.63449	5.00098e-06	9.3785e-05	UP		NO
AT1G64460	0.352227	4.88606	0.00291369	0.0191303	UP		NO
AT1G64480	1.50005	0.530739	1.38768e-05	0.000224059	UP		NO
AT1G64600	0.959972	2.43934	0.000232756	0.00241214	UP		NO
AT1G64610	0.433611	3.47154	0.0060351	0.034359	UP		NO
AT1G64660	-0.351889	6.84569	0.00124976	0.00962571	DOWN		NO
AT1G64740	-0.602386	5.3176	1.06898e-07	3.14723e-06	DOWN		NO
AT1G64750	0.506202	5.67558	2.17348e-05	0.00032608	UP		NO
AT1G64780	0.361493	5.27724	0.00913489	0.0477975	UP		NO
AT1G64790	0.51747	6.77571	1.65437e-05	0.000258446	UP		NO
AT1G64810	-0.397618	5.15927	0.000686477	0.00584165	DOWN		NO
AT1G64860	-0.364739	7.67462	0.00188888	0.0135216	DOWN		NO
AT1G64880	0.604915	5.54568	2.27103e-05	0.000338006	UP		NO
AT1G64920	1.45646	0.260691	4.06807e-05	0.0005563	UP		NO
AT1G64930	1.16756	0.473968	0.00867813	0.0458275	UP		NO
AT1G64940	-1.41422	0.618708	4.70354e-05	0.00062915	DOWN		NO
AT1G65080	0.860687	1.95669	0.000339917	0.00330697	UP		NO
AT1G65120	0.718951	1.28613	0.00965891	0.0499266	UP		NO
AT1G65180	0.906113	1.03354	0.000531135	0.00474639	UP		NO
AT1G65230	-0.338815	6.55655	0.00157682	0.0116932	DOWN		NO
AT1G65250	1.03419	0.630813	0.00153507	0.0114336	UP		NO
AT1G65260	-0.446814	7.68334	3.89658e-06	7.54691e-05	DOWN		NO
AT1G65270	0.328874	5.4294	0.00314217	0.0203326	UP		NO
AT1G65290	0.558749	6.27696	2.94187e-07	7.7897e-06	UP		NO
AT1G65330	1.60387	-1.62214	0.00151577	0.0113124	UP		NO
AT1G65370	1.5548	5.34089	6.42865e-14	6.27604e-12	UP		NO
AT1G65390	1.99907	-1.70251	0.000217672	0.00227896	UP		NO
AT1G65480	-4.06741	1.29356	6.6039e-37	4.04411e-34	DOWN		NO
AT1G65483	4.88342	-3.28589	0.00183054	0.0132051	UP		NO
AT1G65490	1.02556	4.47378	3.16368e-10	1.61204e-08	UP		NO
AT1G65500	2.52784	1.14367	3.6404e-13	3.19303e-11	UP		NO
AT1G65540	0.334708	5.85905	0.000998923	0.00799542	UP		NO
AT1G65590	-0.437137	6.04592	6.40555e-05	0.000807733	DOWN		NO
AT1G65610	0.814024	3.01392	0.00309291	0.0200911	UP		NO
AT1G65660	-0.264749	6.00372	0.00943519	0.0490411	DOWN	YES	NO
AT1G65690	0.698538	3.59225	0.000160381	0.00176011	UP		NO
AT1G65700	0.606551	3.25386	0.000262347	0.00266871	UP	YES	NO
AT1G65790	4.08645	0.205377	9.08486e-17	1.25921e-14	UP		NO
AT1G65820	0.523576	6.1366	1.02265e-05	0.000174223	UP		NO
AT1G65840	0.93184	5.65791	1.63975e-10	9.05384e-09	UP		NO
AT1G65860	1.36369	3.75902	3.69731e-11	2.31898e-09	UP		NO
AT1G65890	1.92955	-0.976794	0.00399205	0.0247248	UP		NO
AT1G65920	0.655	4.07552	7.86724e-05	0.000959365	UP		NO
AT1G65950	0.657866	4.33205	1.89774e-06	4.05313e-05	UP		NO
AT1G65970	1.09336	5.74803	2.99532e-15	3.53984e-13	UP		NO
AT1G65985	1.09918	1.96069	5.44756e-06	0.00010137	UP		YES	1:24568679:AAT-A;intronic_variant
AT1G66060	-2.28231	-2.28413	0.00236297	0.0161724	DOWN		NO
AT1G66090	3.01074	0.470442	1.61504e-07	4.52924e-06	UP		NO
AT1G66100	3.20753	0.811938	0.000208056	0.00219741	UP		NO
AT1G66130	-0.434302	5.7188	0.000343183	0.00332913	DOWN		NO
AT1G66150	-0.554052	7.10749	1.36051e-07	3.88663e-06	DOWN		NO
AT1G66180	-0.583159	7.45124	2.51773e-07	6.74083e-06	DOWN		NO
AT1G66240	0.353201	6.40564	0.000589232	0.00515077	UP		NO
AT1G66270	1.42296	6.5191	5.54957e-08	1.73552e-06	UP		NO
AT1G66280	1.69656	5.70487	2.66904e-10	1.38943e-08	UP		NO
AT1G66320	3.09983	-3.05601	0.00638881	0.0359475	UP		NO
AT1G66330	-0.280983	7.12321	0.00835678	0.0445567	DOWN		NO
AT1G66345	0.638414	2.091	0.00145982	0.0109482	UP		NO
AT1G66370	3.79225	-2.38981	0.00734894	0.0403258	UP		NO
AT1G66390	4.62366	0.0402089	1.93328e-09	8.36952e-08	UP		YES	1:24764419:CAT-C;intronic_variant
AT1G66410	0.278537	6.75591	0.00805836	0.0433153	UP		NO
AT1G66460	1.23576	-0.350419	0.00170599	0.0124533	UP		NO
AT1G66465	3.09191	-2.62085	0.000447857	0.00412702	UP		NO
AT1G66470	1.50631	1.53476	1.08691e-06	2.47352e-05	UP		NO
AT1G66520	0.630458	2.66621	0.00417911	0.0256107	UP		NO
AT1G66570	4.21814	-2.07958	4.63996e-08	1.48272e-06	UP		NO
AT1G66580	0.440378	7.101	2.9748e-05	0.000424732	UP		NO
AT1G66590	0.912232	2.64948	8.81413e-06	0.000153419	UP		NO
AT1G66600	6.55938	-2.39152	8.62482e-09	3.26396e-07	UP		NO
AT1G66700	4.94087	0.786293	2.33677e-17	3.43689e-15	UP		NO
AT1G66725	1.43337	2.37915	2.98623e-10	1.53556e-08	UP		NO
AT1G66760	-1.10483	6.30469	6.21669e-17	8.76085e-15	DOWN		NO
AT1G66783	-0.947281	3.7831	4.92078e-10	2.41952e-08	DOWN		NO
AT1G66800	2.04545	0.55814	3.97109e-06	7.64769e-05	UP		NO
AT1G66860	1.95031	-1.17172	0.000102442	0.00119804	UP		NO
AT1G66880	1.11292	3.97885	8.49538e-08	2.56162e-06	UP		NO
AT1G66920	1.71072	3.113	3.29864e-09	1.36824e-07	UP		NO
AT1G66940	0.964119	3.12443	9.54729e-05	0.00112631	UP		NO
AT1G66950	2.13368	-0.143303	4.99788e-07	1.23321e-05	UP		NO
AT1G66960	2.98549	-1.77115	5.67538e-06	0.000104799	UP		NO
AT1G67000	3.36373	-1.44701	2.44228e-08	8.31734e-07	UP		NO
AT1G67030	0.482665	3.29958	0.0032615	0.0209839	UP		NO
AT1G67100	1.53502	0.394679	4.86164e-05	0.000646702	UP		NO
AT1G67105	6.00327	7.26118	4.87833e-223	5.47691e-219	UP		YES	1:25058254:G-GA;exonic_variant
AT1G67110	-0.948552	0.392062	0.00138462	0.0104988	DOWN		NO
AT1G67120	0.866036	5.44686	5.21304e-10	2.54834e-08	UP		YES	1:25083983:C-T;protein_coding;missense;GAA>AAA;E>K,1:25082907:C-T;protein_coding;missense;GGG>GAG;G>E,1:25072060:C-T;protein_coding;missense;GAT>AAT;D>N
AT1G67148	2.63866	1.11048	5.48093e-15	6.19474e-13	UP		NO
AT1G67150	2.55514	-0.857193	1.74962e-09	7.67305e-08	UP		NO
AT1G67210	1.2817	2.93309	1.74076e-12	1.3763e-10	UP		NO
AT1G67230	-0.347089	6.81639	0.00047965	0.00436742	DOWN		NO
AT1G67250	0.406582	4.68719	0.00113435	0.0089017	UP		NO
AT1G67265	-1.0509	0.173268	0.000586634	0.00513739	DOWN		NO
AT1G67270	2.19074	-2.21208	0.00428842	0.0261568	UP		YES	1:25183402:A-AT;exonic_variant&protein_coding
AT1G67330	0.449165	4.60946	0.00105574	0.00837528	UP		NO
AT1G67350	0.325925	5.73263	0.002551	0.0171806	UP		NO
AT1G67360	0.33817	4.95483	0.008316	0.0443955	UP		NO
AT1G67400	1.26788	2.89682	4.18272e-10	2.07785e-08	UP		NO
AT1G67430	0.465417	7.64576	0.000477603	0.00435349	UP		YES	1:25263143:GAGGTGAGACGAGCATTCATTTAATTAAGGAAACTTTTTCTTGTTTCTCTCTGTACCCTTTTGCTAATAAGCATATTTTGACTTTGAATGTTC-G;intronic_variant&splice_donor_region_variant&splice_donor_variant,1:25263143:GAGGTGAGACGAGCATTCATTTAATTAAGGAAACTTTTTCTTGTTTCTCTCTGTACCCTTTTGCTAATAAGCATATTTTGACTTTGAATGTTC-G;intronic_variant&splice_acceptor_region_variant&splice_donor_region_variant&splice_donor_variant
AT1G67480	0.290163	6.4856	0.00530214	0.0309844	UP		NO
AT1G67520	0.948935	0.87551	0.00159359	0.0117809	UP		NO
AT1G67550	0.731858	4.81287	3.27586e-10	1.66166e-08	UP		NO
AT1G67560	0.466481	4.83262	0.0010423	0.00829128	UP		NO
AT1G67600	0.605069	1.88243	0.00647333	0.0363623	UP		NO
AT1G67626	1.8586	-0.108678	3.08101e-07	8.13256e-06	UP		NO
AT1G67700	-0.391723	7.86014	0.000149369	0.00165599	DOWN		NO
AT1G67760	2.16775	0.110884	7.72078e-07	1.81976e-05	UP		NO
AT1G67785	0.360955	5.70674	0.00186912	0.0134259	UP		NO
AT1G67800	0.568315	3.40612	0.00319844	0.0206175	UP		NO
AT1G67810	2.47498	1.57543	6.30408e-09	2.4718e-07	UP		NO
AT1G67856	-0.863534	0.970302	0.00764002	0.0415843	DOWN		NO
AT1G67865	1.13855	5.87795	5.92354e-12	4.22212e-10	UP		NO
AT1G67900	-0.659914	6.02991	4.95867e-07	1.22443e-05	DOWN		NO
AT1G67910	-0.457602	3.87755	0.00286409	0.0188667	DOWN		NO
AT1G67920	0.96809	2.56186	0.000148047	0.00164404	UP		NO
AT1G67940	1.12827	3.61368	5.7837e-11	3.49732e-09	UP		NO
AT1G67960	0.443556	4.44922	0.000490826	0.00444873	UP		NO
AT1G67980	2.60798	-0.218104	4.60328e-07	1.15531e-05	UP		NO
AT1G68010	-0.542209	9.82189	4.94647e-06	9.28663e-05	DOWN		YES	1:25493566:C-T;intronic_variant,1:25495013:GAGGTACTGTCATATACGCTATGATGAACCCAAAACATACTAGTTTATCTCTGGGAGCTTAGTAAGTGTTGTTAAATCACATTGTTTC-G;intronic_variant&splice_acceptor_region_variant&splice_donor_region_variant&splice_donor_variant&protein_coding,1:25495013:GAGGTACTGTCATATACGCTATGATGAACCCAAAACATACTAGTTTATCTCTGGGAGCTTAGTAAGTGTTGTTAAATCACATTGTTTC-G;intronic_variant&splice_acceptor_region_variant&spl…
AT1G68020	-0.361925	6.03716	0.00104708	0.0083235	DOWN		NO
AT1G68170	-3.222	-0.427178	2.20383e-13	1.99536e-11	DOWN		NO
AT1G68238	0.755741	2.42145	0.00129692	0.00993669	UP		NO
AT1G68240	1.62052	-0.0816105	9.23233e-06	0.000159709	UP		NO
AT1G68300	0.388328	4.85604	0.00230576	0.0158717	UP		NO
AT1G68450	0.914627	-0.144288	0.00804286	0.0432527	UP		NO
AT1G68490	0.373094	6.00671	0.000534464	0.00476975	UP		NO
AT1G68520	-0.482976	7.86449	0.000257696	0.00262854	DOWN		NO
AT1G68552	1.32854	0.125421	0.000284595	0.0028435	UP		NO
AT1G68585	0.543857	2.38973	0.00549856	0.0318427	UP		NO
AT1G68620	1.15114	3.59742	1.05636e-05	0.000179116	UP		NO
AT1G68630	6.00594	-2.71729	3.89428e-05	0.000536455	UP		NO
AT1G68650	0.651807	2.38261	0.0043856	0.0266291	UP		NO
AT1G68680	1.04055	4.3022	3.07806e-15	3.61227e-13	UP		NO
AT1G68710	0.359582	4.75066	0.00252712	0.0170505	UP		NO
AT1G68735	-2.31895	-1.16216	0.00351892	0.0222323	DOWN		NO
AT1G68740	0.820155	3.35405	0.00346654	0.0219963	UP		NO
AT1G68760	0.514963	3.45167	0.00137774	0.0104583	UP		NO
AT1G68765	4.25966	-2.38882	0.000409467	0.00385123	UP		NO
AT1G68780	-0.544316	4.75267	7.37247e-06	0.000131591	DOWN		NO
AT1G68850	0.578716	2.128	0.00565764	0.0326125	UP		NO
AT1G68935	-0.759369	1.61342	0.000578175	0.00507916	DOWN		NO
AT1G68940	0.663999	1.56414	0.00314102	0.0203291	UP		NO
AT1G68990	0.484126	4.40814	0.00187361	0.0134495	UP		NO
AT1G69040	0.511813	5.10689	0.001819	0.0131303	UP		NO
AT1G69070	0.388771	4.43954	0.00694823	0.0385541	UP		NO
AT1G69080	0.656205	1.80527	0.00241427	0.0164339	UP		NO
AT1G69160	-0.365184	5.66137	0.00318017	0.0205249	DOWN		NO
AT1G69200	0.594424	5.07131	0.00328197	0.0210834	UP		NO
AT1G69240	1.50893	1.7615	0.000225786	0.00234785	UP		NO
AT1G69310	0.748538	4.75276	1.32833e-08	4.82107e-07	UP		YES	1:26055611:CAT-C;exonic_variant,1:26055611:CAT-C;intronic_variant
AT1G69325	1.48496	-0.880876	0.000108089	0.00125623	UP		NO
AT1G69340	0.542749	5.92994	1.71825e-07	4.78284e-06	UP		NO
AT1G69360	-0.524618	5.04511	1.55573e-05	0.000246466	DOWN		NO
AT1G69380	0.800095	3.24352	2.74119e-05	0.000395739	UP		NO
AT1G69490	0.903538	5.71296	6.07008e-05	0.000774712	UP		NO
AT1G69510	0.481444	6.55874	0.000152393	0.00168574	UP		NO
AT1G69520	0.973429	0.411374	0.00114005	0.00893601	UP		NO
AT1G69523	-0.646152	3.69403	0.000110704	0.00128043	DOWN		NO
AT1G69526	-0.607023	2.74907	0.00318796	0.0205658	DOWN		NO
AT1G69530	0.56754	7.17496	2.98962e-05	0.000426251	UP		NO
AT1G69700	0.585069	4.32207	0.000345434	0.00334904	UP		NO
AT1G69710	1.56232	-0.3761	4.92068e-05	0.000652751	UP		NO
AT1G69720	1.74479	-0.1883	3.41163e-05	0.00047838	UP		NO
AT1G69730	1.1682	3.8146	5.9218e-08	1.84507e-06	UP		NO
AT1G69750	0.415165	4.70316	0.00211273	0.0147817	UP		NO
AT1G69760	-0.862526	4.96023	5.89758e-05	0.000757269	DOWN		NO
AT1G69810	0.656081	3.0924	0.000922316	0.00748903	UP		NO
AT1G69880	1.96094	2.57598	2.16376e-11	1.40419e-09	UP		NO
AT1G69920	5.18706	-0.863187	5.54528e-11	3.36523e-09	UP		NO
AT1G69930	6.02666	0.201578	4.47253e-09	1.79563e-07	UP		NO
AT1G70090	-0.979816	5.47229	1.77295e-08	6.26531e-07	DOWN		NO
AT1G70100	-0.37386	5.59569	0.000455614	0.0041802	DOWN		NO
AT1G70170	1.16378	0.740508	0.000108434	0.00125937	UP		NO
AT1G70260	1.69617	0.175057	0.00368467	0.0231493	UP		NO
AT1G70290	-0.400781	8.13213	0.00203896	0.014379	DOWN		NO
AT1G70300	-0.357088	5.6379	0.00493586	0.0292273	DOWN		NO
AT1G70340	0.802203	1.88982	0.00141025	0.0106528	UP		NO
AT1G70430	0.701161	2.28878	0.00203977	0.0143818	UP		NO
AT1G70440	1.75956	-1.19143	0.000128243	0.00144993	UP		NO
AT1G70460	1.1853	3.03323	7.13994e-05	0.000883794	UP		NO
AT1G70475	-4.97397	-3.14156	0.00424257	0.0259242	DOWN		NO
AT1G70530	-0.429986	6.15849	9.75279e-05	0.00114734	DOWN		NO
AT1G70580	-0.48775	6.23199	0.00305708	0.019889	DOWN		NO
AT1G70710	0.492189	4.67763	0.00854344	0.0452938	UP		NO
AT1G70760	-0.31363	7.49865	0.00185304	0.0133359	DOWN		NO
AT1G70780	0.288052	7.10059	0.00721734	0.0397827	UP		NO
AT1G70782	0.493932	2.70663	0.00626221	0.0353651	UP		NO
AT1G70830	0.763692	7.93217	1.67389e-06	3.63496e-05	UP		NO
AT1G70880	-1.32505	1.58073	2.29037e-07	6.19615e-06	DOWN		NO
AT1G70890	0.432833	6.41569	3.04499e-05	0.000432736	UP		NO
AT1G70895	0.596348	2.06838	0.00402593	0.0248883	UP		NO
AT1G70900	0.425296	5.19489	0.000589116	0.00515077	UP		NO
AT1G70950	0.653444	2.542	0.00314386	0.0203397	UP		NO
AT1G71010	0.276304	6.55212	0.00576295	0.0331006	UP		NO
AT1G71015	1.51337	-0.152812	2.80843e-05	0.000403544	UP		NO
AT1G71050	0.770268	1.74791	0.000849982	0.00698205	UP		NO
AT1G71080	0.460421	5.64267	0.000415061	0.00388948	UP		NO
AT1G71110	0.739111	3.16624	0.000767052	0.00641388	UP		NO
AT1G71200	1.28178	1.1891	7.49722e-05	0.00092004	UP		NO
AT1G71260	1.22452	4.85329	7.27032e-10	3.45376e-08	UP		NO
AT1G71280	2.15323	-1.26424	5.88763e-06	0.000107949	UP		NO
AT1G71400	1.04901	2.53617	3.02014e-05	0.000429748	UP		NO
AT1G71410	0.295909	5.6362	0.00706433	0.039121	UP		NO
AT1G71480	-0.393885	5.7718	0.000456092	0.00418345	DOWN		NO
AT1G71500	-0.334756	8.10995	0.00146826	0.0110017	DOWN		NO
AT1G71520	2.56746	-2.26078	0.00207115	0.0145603	UP		NO
AT1G71528	1.05248	2.93865	1.85924e-05	0.00028542	UP		NO
AT1G71530	1.00232	1.92062	0.000986913	0.0079181	UP		NO
AT1G71696	-0.629205	3.96175	4.16676e-05	0.000567211	DOWN		NO
AT1G71730	0.425691	4.72405	0.00113939	0.00893501	UP		NO
AT1G71740	1.27544	1.50956	1.16537e-05	0.000193164	UP		NO
AT1G71850	0.830878	2.20824	0.000127263	0.00144031	UP		NO
AT1G71970	-0.612673	5.18356	7.6473e-07	1.8075e-05	DOWN		NO
AT1G72020	0.481263	6.22299	9.30253e-06	0.000160594	UP		NO
AT1G72030	0.319882	5.36848	0.00588995	0.0336693	UP		NO
AT1G72125	1.18796	0.720139	3.50848e-05	0.000489515	UP		NO
AT1G72150	-0.921434	9.17418	3.35798e-11	2.12995e-09	DOWN		NO
AT1G72160	-0.406477	7.12593	0.00038996	0.00370396	DOWN		NO
AT1G72170	0.41629	3.92032	0.00502581	0.0296504	UP		NO
AT1G72180	-0.909975	6.39571	6.84469e-10	3.27466e-08	DOWN		NO
AT1G72210	0.942886	0.784373	0.00041612	0.00389532	UP		NO
AT1G72220	0.909103	0.520995	0.000583798	0.00511815	UP		NO
AT1G72230	0.763214	2.92867	4.94106e-05	0.000654423	UP		NO
AT1G72260	7.40234	-1.78881	0.000191609	0.00205332	UP		NO
AT1G72280	1.04943	1.55528	0.000153575	0.00169426	UP		NO
AT1G72416	-1.03781	2.51041	0.000354115	0.00342193	DOWN		NO
AT1G72430	-1.01034	5.65654	1.942e-05	0.000296503	DOWN		NO
AT1G72490	1.23928	0.462266	1.13558e-05	0.000189438	UP		NO
AT1G72540	2.49631	-1.40359	0.000152911	0.00168858	UP		YES	1:27316121:G-A;protein_coding;missense;CCA>TCA;P>S
AT1G72610	-0.439576	7.68266	0.00392448	0.0244101	DOWN		NO
AT1G72690	0.653214	1.95823	0.00229848	0.0158281	UP		NO
AT1G72720	1.14791	-0.166123	0.00141895	0.010706	UP		NO
AT1G72730	0.603728	3.40443	0.00202665	0.0143102	UP		NO
AT1G72790	-0.570439	4.36602	7.69802e-05	0.000940774	DOWN		NO
AT1G72860	1.68938	0.948858	2.32657e-06	4.82223e-05	UP		NO
AT1G72910	1.4494	3.42112	0.000118544	0.00135805	UP		NO
AT1G72950	0.844458	-0.0585083	0.00667337	0.0372375	UP		NO
AT1G73010	5.50415	4.33089	8.57777e-11	4.9726e-09	UP		NO
AT1G73020	0.627055	3.22275	0.00618589	0.0350249	UP		YES	1:27469938:C-T;protein_coding;missense;GGA>AGA;G>R
AT1G73120	-1.56692	3.54748	7.83502e-13	6.50815e-11	DOWN		NO
AT1G73160	1.39319	-0.107415	0.000225628	0.00234694	UP		NO
AT1G73180	0.505345	5.37958	3.8022e-05	0.000525275	UP		NO
AT1G73220	6.11817	2.38316	1.3772e-13	1.29207e-11	UP		NO
AT1G73260	0.869354	5.70662	3.16467e-07	8.30781e-06	UP		NO
AT1G73300	-1.76715	0.883486	1.54037e-09	6.87168e-08	DOWN		NO
AT1G73310	0.502429	3.20972	0.00422851	0.0258523	UP		YES	1:27562563:C-T;exonic_variant,1:27562959:T-TAAAAAAA;intronic_variant
AT1G73325	6.61781	-2.33759	0.000680668	0.00579954	UP		NO
AT1G73330	0.92733	7.5496	5.71789e-09	2.27104e-07	UP		NO
AT1G73350	1.09138	4.78092	2.40047e-16	3.1706e-14	UP		NO
AT1G73390	-0.319079	5.91017	0.00670906	0.0374119	DOWN		NO
AT1G73550	-0.987983	0.181856	0.00676596	0.0376668	DOWN		NO
AT1G73580	1.36223	1.33819	0.000821989	0.00679563	UP		NO
AT1G73600	0.701579	6.02541	0.000780068	0.00650817	UP		NO
AT1G73610	1.53748	-0.702626	0.00506522	0.0298276	UP		NO
AT1G73680	-0.282505	6.27558	0.00538814	0.0313704	DOWN		NO
AT1G73750	-0.532349	6.13693	1.37535e-05	0.000222386	DOWN		NO
AT1G73780	1.49108	-0.282139	4.05075e-05	0.000554628	UP		NO
AT1G73805	3.19398	0.828632	1.35092e-11	9.06379e-10	UP		NO
AT1G73810	2.00546	0.693855	7.59807e-10	3.58921e-08	UP		NO
AT1G73820	0.422742	4.04788	0.00225383	0.0155748	UP		NO
AT1G73840	0.332688	5.39654	0.00329044	0.0211176	UP		NO
AT1G73860	1.06939	1.63405	0.00049156	0.00445419	UP		NO
AT1G73870	-0.407866	6.41878	0.00347341	0.0220275	DOWN		YES	1:27779240:C-T;protein_coding;sense;ACC>ACT;T>T
AT1G73920	-0.484576	6.8187	4.20945e-06	8.03733e-05	DOWN		NO
AT1G73940	0.639919	4.07366	9.42499e-05	0.00111345	UP		NO
AT1G73970	0.416833	4.5836	0.000668168	0.00570892	UP		YES	1:27819123:C-T;intronic_variant
AT1G73990	-0.438824	5.64217	1.89562e-05	0.000289947	DOWN		NO
AT1G74000	0.971241	0.0832033	0.00499803	0.0295383	UP		NO
AT1G74020	0.680327	4.50575	8.52887e-05	0.0010252	UP		NO
AT1G74030	0.73168	4.77247	2.02106e-05	0.000306879	UP		NO
AT1G74040	-0.384223	5.189	0.000525078	0.00470219	DOWN		NO
AT1G74055	0.717296	0.37075	0.00944948	0.0490854	UP		NO
AT1G74088	0.779405	1.65568	0.00101664	0.00811603	UP		NO
AT1G74200	0.776102	0.742672	0.00812235	0.0435619	UP		NO
AT1G74210	1.12447	4.30893	9.60549e-09	3.6027e-07	UP		NO
AT1G74240	0.744136	2.19758	0.000935268	0.00757412	UP		NO
AT1G74270	0.661272	5.73313	6.94469e-08	2.14002e-06	UP		NO
AT1G74290	-1.62544	2.62418	2.78549e-12	2.1274e-10	DOWN		NO
AT1G74300	0.934241	2.63631	2.67173e-06	5.45373e-05	UP		NO
AT1G74310	-0.527677	3.76649	0.00404876	0.0249847	DOWN		NO
AT1G74360	1.40271	2.51263	4.51835e-08	1.44936e-06	UP		NO
AT1G74440	1.74218	0.547181	1.3928e-10	7.75387e-09	UP		NO
AT1G74490	1.1808	0.96395	0.000704602	0.00597324	UP		NO
AT1G74500	1.12282	2.47625	0.000591232	0.0051629	UP		NO
AT1G74510	0.458553	4.75927	0.000130321	0.00146997	UP		NO
AT1G74560	0.574687	6.33285	3.31464e-06	6.58646e-05	UP		NO
AT1G74590	1.91831	2.30017	4.90268e-10	2.41414e-08	UP		NO
AT1G74600	0.576277	2.12001	0.00739341	0.0405187	UP		NO
AT1G74650	1.84251	2.74405	7.54143e-11	4.43075e-09	UP		NO
AT1G74675	-4.83092	-2.93249	0.0033959	0.0216612	DOWN		YES	1:28054306:C-T;exonic_variant
AT1G74800	0.435077	4.09802	0.00335259	0.0214348	UP		NO
AT1G74910	-0.395245	7.4246	9.76295e-05	0.00114813	DOWN		NO
AT1G74960	-0.452615	7.40706	2.9782e-06	6.00652e-05	DOWN		NO
AT1G75000	1.08537	1.21145	0.000180576	0.00195311	UP		NO
AT1G75100	-0.528174	6.74253	6.62606e-07	1.59181e-05	DOWN		NO
AT1G75160	1.41021	-0.316682	0.00266684	0.0177935	UP		NO
AT1G75200	0.37977	4.38049	0.00480654	0.0286377	UP		NO
AT1G75220	-0.38804	6.33316	0.00365748	0.0229913	DOWN		NO
AT1G75230	-0.801916	3.91403	6.02208e-05	0.000769549	DOWN		NO
AT1G75250	1.12508	-0.762554	0.0023267	0.0159734	UP		NO
AT1G75270	0.427773	4.79438	0.00343125	0.02183	UP		NO
AT1G75280	0.701357	6.19159	1.45707e-05	0.000233916	UP		NO
AT1G75290	1.72947	0.247148	5.21921e-07	1.28313e-05	UP		NO
AT1G75300	1.22376	0.529096	2.52464e-05	0.000368904	UP		NO
AT1G75330	0.46552	6.4678	5.66422e-06	0.000104732	UP		NO
AT1G75335	0.748409	1.44944	0.00786005	0.0425208	UP		NO
AT1G75370	-0.420822	6.43836	0.000178142	0.00193051	DOWN		NO
AT1G75390	-2.59222	-0.345003	1.14474e-07	3.34979e-06	DOWN		NO
AT1G75460	-0.324236	7.36143	0.00867468	0.0458237	DOWN		NO
AT1G75490	-0.467993	4.1554	0.00475991	0.0284152	DOWN		NO
AT1G75500	0.476351	6.1924	0.000502147	0.00453062	UP		NO
AT1G75590	0.820043	1.20319	0.00513506	0.0301787	UP		NO
AT1G75670	0.674252	2.56504	0.00060455	0.00525738	UP		NO
AT1G75680	0.340216	6.45664	0.00258467	0.0173519	UP		NO
AT1G75690	-0.442845	7.3735	1.34679e-05	0.000218188	DOWN		NO
AT1G75700	1.39829	-1.30117	0.00249902	0.0168913	UP		NO
AT1G75750	-0.372427	6.85986	0.00604092	0.0343806	DOWN		NO
AT1G75760	0.45563	4.67098	0.00036677	0.00352416	UP		NO
AT1G75830	4.07463	-2.71906	2.95273e-05	0.000422117	UP		NO
AT1G75860	0.417766	4.52195	0.00108681	0.00858262	UP		NO
AT1G75945	0.626921	2.50887	0.00339092	0.0216389	UP		NO
AT1G76040	0.504749	3.4724	0.00841114	0.0447969	UP		NO
AT1G76090	-0.581279	5.32182	0.000488298	0.00443059	DOWN		NO
AT1G76100	-0.362473	7.40928	0.000592383	0.00517026	DOWN		NO
AT1G76110	-0.713687	5.58854	1.30616e-09	5.90509e-08	DOWN		NO
AT1G76200	0.498579	5.7214	0.000152899	0.00168858	UP		NO
AT1G76270	0.406266	3.70681	0.00738276	0.0404784	UP		NO
AT1G76410	-0.918916	2.71005	4.61211e-07	1.15667e-05	DOWN		NO
AT1G76520	0.863244	5.65217	1.7394e-06	3.75302e-05	UP		NO
AT1G76530	3.80313	1.1837	3.81158e-18	6.35534e-16	UP		NO
AT1G76570	-0.524638	4.71709	4.70013e-05	0.000628944	DOWN		NO
AT1G76620	1.10697	1.65307	3.69373e-05	0.000512392	UP		NO
AT1G76680	0.967189	5.21461	0.000103083	0.0012047	UP		NO
AT1G76705	-0.663428	1.90799	0.00142586	0.0107534	DOWN		NO
AT1G76730	-0.503459	5.83842	3.97132e-06	7.64769e-05	DOWN		NO
AT1G76760	0.699171	2.20381	0.000548124	0.00487364	UP		NO
AT1G76790	0.933548	5.24177	0.000185448	0.00199681	UP		NO
AT1G76860	0.481671	4.65331	0.0020926	0.0146727	UP	YES	NO
AT1G76890	-0.483956	5.4517	1.87237e-05	0.000287017	DOWN		NO
AT1G76940	0.556761	4.4737	8.03923e-06	0.000141764	UP		YES	1:28904347:C-T;exonic_variant
AT1G76960	1.61426	3.8881	6.69901e-07	1.60819e-05	UP		NO
AT1G76970	0.609145	3.08271	0.00152929	0.0113956	UP		NO
AT1G77030	0.71764	4.3212	2.15254e-05	0.000323227	UP		NO
AT1G77120	2.44267	5.14217	4.54151e-17	6.50905e-15	UP		NO
AT1G77130	0.445319	5.3439	3.18136e-05	0.000449649	UP		NO
AT1G77131	1.87568	-0.106827	3.44367e-06	6.80671e-05	UP		NO
AT1G77145	-0.722388	2.75859	8.00325e-05	0.000971028	DOWN		NO
AT1G77260	0.520319	4.79191	1.41875e-05	0.000228636	UP		NO
AT1G77270	0.834452	3.04241	0.00211156	0.0147765	UP		NO
AT1G77280	0.446003	3.97561	0.00424871	0.025957	UP		NO
AT1G77320	1.0396	3.63394	3.17709e-09	1.32271e-07	UP		NO
AT1G77330	0.94088	5.33861	4.82843e-07	1.19754e-05	UP		NO
AT1G77350	0.391918	4.08115	0.008654	0.0457427	UP		NO
AT1G77360	0.852958	0.786374	0.0021383	0.0149338	UP		NO
AT1G77410	0.613958	2.185	0.00267845	0.0178569	UP		NO
AT1G77420	0.5329	3.64087	0.000471226	0.00430468	UP		NO
AT1G77460	0.739988	3.97431	3.93131e-06	7.60106e-05	UP		NO
AT1G77490	-0.251522	6.84753	0.00951099	0.0493285	DOWN		NO
AT1G77540	0.584269	3.5437	0.000625266	0.00540266	UP		NO
AT1G77590	0.487063	5.76792	6.51219e-06	0.000117987	UP		NO
AT1G77660	1.0611	3.05871	1.59129e-08	5.65997e-07	UP		NO
AT1G77670	0.438378	4.64353	0.00189546	0.0135579	UP		NO
AT1G77750	0.928273	3.51271	2.99914e-08	9.99149e-07	UP		NO
AT1G77760	-0.713723	7.99244	1.08208e-05	0.000182318	DOWN		NO
AT1G77855	-0.930462	1.52233	0.000243303	0.00250603	DOWN		NO
AT1G77920	0.497579	4.59601	0.000573995	0.00506038	UP		YES	1:29300903:T-TTA;exonic_variant,1:29300884:TA-T;exonic_variant,1:29300932:C-T;exonic_variant,1:29300853:A-G;exonic_variant,1:29300922:T-C;exonic_variant,1:29300905:ATG-A;exonic_variant,1:29300940:A-AG;exonic_variant,1:29300780:C-G;exonic_variant,1:29300755:G-T;exonic_variant,1:29300896:A-C;exonic_variant,1:29300880:T-A;exonic_variant,1:29300847:C-A;exonic_variant
AT1G77940	0.77532	6.57485	3.53025e-11	2.22247e-09	UP		NO
AT1G77960	-2.25808	1.58759	1.36042e-11	9.10937e-10	DOWN		NO
AT1G77990	0.566	3.98426	0.000350502	0.0033921	UP		NO
AT1G78050	0.520321	2.72971	0.00501743	0.029613	UP		NO
AT1G78100	-0.448293	4.91283	0.00283082	0.0186804	DOWN		NO
AT1G78130	0.42055	3.92769	0.00571051	0.032861	UP		NO
AT1G78190	0.820477	0.363008	0.00701646	0.0389084	UP		NO
AT1G78206	3.39779	-2.41682	4.75564e-05	0.000634858	UP		NO
AT1G78210	0.441397	4.05047	0.00441831	0.0267939	UP		NO
AT1G78260	0.532062	3.56641	0.00239741	0.0163527	UP		NO
AT1G78270	0.83819	2.9206	0.000293378	0.00291827	UP		NO
AT1G78410	3.94701	-0.0453873	2.23474e-10	1.17975e-08	UP		NO
AT1G78420	1.55257	6.14024	3.12021e-45	3.09093e-42	UP		NO
AT1G78460	1.0488	5.59298	7.74642e-11	4.53752e-09	UP		NO
AT1G78480	0.768642	0.616552	0.00744863	0.0407931	UP		NO
AT1G78570	0.605867	6.8207	3.82338e-06	7.43935e-05	UP		NO
AT1G78580	-0.325173	5.46764	0.00411844	0.0253133	DOWN		NO
AT1G78610	-0.397091	5.4849	0.00196528	0.0139529	DOWN		NO
AT1G78620	-0.364072	4.99374	0.00116533	0.00909172	DOWN		NO
AT1G78670	-0.468283	6.50946	7.58483e-06	0.00013481	DOWN		NO
AT1G78720	-2.64734	-0.621298	1.34041e-07	3.83245e-06	DOWN		NO
AT1G78730	0.723584	2.32017	0.000312697	0.0030799	UP		NO
AT1G78860	0.939578	1.03879	0.00237872	0.0162676	UP		NO
AT1G78930	0.85384	1.77388	0.00118819	0.00923386	UP		NO
AT1G78970	0.65185	5.49869	0.000373328	0.00357117	UP		NO
AT1G79030	0.396643	4.39853	0.00116003	0.00905675	UP		NO
AT1G79060	-0.493207	3.5309	0.00158338	0.0117209	DOWN		NO
AT1G79150	0.902465	3.87448	2.85323e-08	9.55266e-07	UP		YES	1:29774213:C-T;intronic_variant
AT1G79190	0.497403	4.30129	0.000574994	0.00506575	UP		NO
AT1G79210	0.282523	5.34681	0.00828201	0.0442561	UP		NO
AT1G79245	0.325958	8.98234	0.002499	0.0168913	UP		NO
AT1G79250	1.97592	-0.767393	0.00079331	0.0065974	UP		NO
AT1G79260	0.553789	3.2835	0.00238351	0.0162904	UP		NO
AT1G79310	0.70815	1.10896	0.00778624	0.0422232	UP		NO
AT1G79390	0.570514	3.71581	0.000554854	0.00492049	UP		NO
AT1G79450	0.713023	2.35022	0.000672849	0.00574454	UP		NO
AT1G79470	0.582702	3.11105	0.00298625	0.0194998	UP		NO
AT1G79520	-0.407979	6.31198	0.00241612	0.0164419	DOWN		NO
AT1G79530	0.834814	5.87287	3.68458e-07	9.48055e-06	UP		NO
AT1G79580	1.52529	0.550434	1.99233e-06	4.22302e-05	UP		NO
AT1G79600	-0.539546	7.46048	8.91286e-06	0.000154659	DOWN		NO
AT1G79610	1.34391	4.89384	7.99827e-30	3.49857e-27	UP		NO
AT1G79680	3.82322	-0.158077	6.31232e-07	1.52514e-05	UP		NO
AT1G79750	-0.348253	7.81982	0.000643106	0.00552563	DOWN		NO
AT1G79840	0.577265	3.30266	0.00466392	0.0279814	UP		NO
AT1G79860	1.20244	1.02392	0.00479535	0.0285811	UP		NO
AT1G79890	1.42403	1.02015	2.0324e-06	4.29444e-05	UP		NO
AT1G79910	0.869447	2.48915	1.30851e-05	0.000213012	UP		NO
AT1G79970	-0.447586	6.20022	1.73952e-05	0.00026987	DOWN		NO
AT1G80110	-0.805501	3.31552	8.99597e-05	0.00107027	DOWN		NO
AT1G80130	-0.360594	6.78289	0.00278008	0.0184214	DOWN		YES	1:30141324:C-T;protein_coding;missense;GAA>AAA;E>K,1:30141997:C-T;protein_coding;missense;AGT>AAT;S>N,1:30141324:C-T;exonic_variant
AT1G80170	0.671238	2.93818	0.000243761	0.00250916	UP		NO
AT1G80180	-0.349795	7.61274	0.00345927	0.0219668	DOWN		NO
AT1G80200	0.984759	-0.10182	0.00332383	0.0212913	UP		NO
AT1G80210	0.330483	4.65997	0.00870521	0.0459417	UP		NO
AT1G80270	0.944792	3.55463	1.098e-05	0.000184448	UP		NO
AT1G80310	-0.467562	5.37087	6.1512e-05	0.000782397	DOWN		NO
AT1G80340	1.05889	-0.410875	0.00579929	0.0332684	UP		YES	1:30201871:C-T;protein_coding;missense;CGG>CAG;R>Q
AT1G80380	-0.402723	7.80026	7.15556e-05	0.000884752	DOWN		NO
AT1G80440	-0.581288	8.09346	0.00129043	0.00989372	DOWN		NO
AT1G80500	0.321829	5.03803	0.00494749	0.029291	UP		NO
AT1G80570	-0.481213	3.46108	0.00260187	0.0174326	DOWN		NO
AT1G80620	0.365804	4.77818	0.00531933	0.0310435	UP		NO
AT1G80690	0.548327	2.77184	0.00902848	0.0473376	UP		NO
AT1G80720	1.00328	1.86221	2.38091e-05	0.000352025	UP		NO
AT1G80780	0.317516	7.11553	0.00290672	0.0191085	UP		NO
AT1G80840	1.39733	4.04209	3.9856e-05	0.000547244	UP		NO
AT1G80860	0.32989	4.20563	0.00920017	0.0480793	UP		NO
AT1G80900	2.08015	3.81745	1.93404e-37	1.22907e-34	UP		NO
AT1G80980	0.709886	3.2209	6.77405e-05	0.000846279	UP		NO
AT2G01070	0.35206	4.57146	0.00830307	0.0443402	UP		NO
AT2G01120	0.614822	2.91022	0.00310769	0.0201709	UP		YES	2:86540:TGGA-T;exonic_variant
AT2G01140	0.505509	7.39636	1.01578e-06	2.33213e-05	UP		NO
AT2G01150	0.799758	1.87956	0.000430905	0.00400588	UP		NO
AT2G01190	-0.564296	5.40932	1.05722e-05	0.000179116	DOWN		NO
AT2G01210	1.07894	2.43437	4.10001e-05	0.000559758	UP		NO
AT2G01220	-0.463783	5.62748	2.54464e-05	0.000371505	DOWN		NO
AT2G01250	0.401035	7.78588	0.001538	0.0114529	UP		NO
AT2G01379	4.61865	-3.38811	0.00926891	0.048341	UP		NO
AT2G01422	1.21726	4.75075	3.47505e-14	3.46282e-12	UP		NO
AT2G01520	0.469681	7.14771	0.00771898	0.0419327	UP		NO
AT2G01590	-0.678979	5.44428	4.1991e-09	1.69784e-07	DOWN		NO
AT2G01640	0.570626	2.53728	0.0024501	0.0166235	UP		NO
AT2G01650	0.515938	4.80341	4.50265e-05	0.000605773	UP		NO
AT2G01750	0.569918	3.20988	0.0030997	0.0201274	UP		NO
AT2G01818	0.872905	0.302563	0.00475835	0.0284109	UP		NO
AT2G01830	0.357443	4.71321	0.00471099	0.0281731	UP		NO
AT2G01850	-0.638352	7.53303	7.65934e-07	1.80908e-05	DOWN		NO
AT2G01880	1.74999	2.39419	2.7894e-09	1.16999e-07	UP		NO
AT2G01890	0.343523	5.19628	0.00303451	0.0197728	UP		NO
AT2G01900	1.21228	2.28555	9.25413e-09	3.47866e-07	UP		NO
AT2G01980	0.380658	4.73575	0.0016371	0.0120286	UP		NO
AT2G02010	1.24215	2.08619	0.00239748	0.0163527	UP		NO
AT2G02020	0.746321	2.21955	0.000404945	0.00381936	UP		NO
AT2G02050	0.388927	5.51001	0.00108496	0.00857	UP		NO
AT2G02070	-0.510811	5.7411	2.85801e-06	5.78836e-05	DOWN		NO
AT2G02080	-0.359951	5.81154	0.00143605	0.010806	DOWN		NO
AT2G02130	1.80628	5.7734	1.67608e-44	1.61291e-41	UP		NO
AT2G02150	0.909128	1.75936	0.00252461	0.0170369	UP		NO
AT2G02200	4.00829	-2.6861	3.45058e-05	0.000483039	UP		NO
AT2G02250	1.72038	-1.66908	0.00774048	0.0420157	UP		NO
AT2G02350	0.649891	1.74848	0.00316707	0.0204584	UP		NO
AT2G02380	1.7917	1.07583	2.64445e-10	1.3809e-08	UP		NO
AT2G02400	-1.00094	3.28978	2.44212e-08	8.31734e-07	DOWN		NO
AT2G02510	0.516161	5.01395	1.61394e-05	0.000253895	UP		NO
AT2G02610	1.0807	1.04708	3.99365e-05	0.000548125	UP		NO
AT2G02690	1.79224	-1.80378	0.00173325	0.0126167	UP		NO
AT2G02710	-0.371268	7.05456	0.00168874	0.0123407	DOWN		NO
AT2G02740	0.501031	3.66237	0.00718395	0.039679	UP		NO
AT2G02780	0.452073	4.59332	0.000644662	0.00553758	UP		NO
AT2G02810	0.520202	3.48917	0.00251216	0.0169666	UP		NO
AT2G02930	1.00373	1.79644	0.00333799	0.0213617	UP		NO
AT2G02950	-0.471085	4.82634	0.000804636	0.00667511	DOWN		NO
AT2G02990	3.44765	1.24029	1.57245e-05	0.000248764	UP		NO
AT2G03070	0.540163	4.56759	1.39698e-05	0.000225343	UP		NO
AT2G03080	3.21267	-3.10404	0.00626814	0.0353808	UP		NO
AT2G03090	0.922795	3.87976	7.11197e-05	0.000881628	UP		NO
AT2G03120	0.329664	5.93299	0.0023018	0.0158477	UP		NO
AT2G03200	0.667449	2.1639	0.00124601	0.00959899	UP		NO
AT2G03220	0.350985	4.25208	0.00965278	0.0499179	UP		NO
AT2G03240	-0.499902	5.22502	0.000137392	0.00153952	DOWN		NO
AT2G03280	1.16091	3.09151	1.27936e-07	3.69556e-06	UP		NO
AT2G03310	-0.444813	5.09606	0.000372571	0.00356696	DOWN		NO
AT2G03440	-0.323691	7.17017	0.00190332	0.0136105	DOWN		NO
AT2G03505	0.878804	0.804238	0.00949968	0.0492927	UP		NO
AT2G03520	-3.14676	-2.11801	5.33467e-05	0.000699159	DOWN		NO
AT2G03550	-0.860813	5.01601	5.11946e-12	3.71613e-10	DOWN		NO
AT2G03640	-0.498452	6.07132	1.77009e-06	3.81191e-05	DOWN		NO
AT2G03720	1.08859	1.79593	0.00903087	0.0473415	UP		NO
AT2G03980	0.468835	4.19401	0.00342196	0.0217832	UP		NO
AT2G04025	1.41251	-0.274705	0.000251384	0.00257274	UP		NO
AT2G04030	0.471045	8.12396	0.00313426	0.020304	UP		NO
AT2G04032	2.38203	-1.47387	5.70851e-06	0.000105237	UP		NO
AT2G04040	1.78052	1.13472	0.00057367	0.00505938	UP		NO
AT2G04080	0.596785	3.48199	0.00277707	0.0184123	UP		NO
AT2G04100	0.55901	3.40423	0.00117932	0.00918394	UP		NO
AT2G04110	-1.2263	4.89467	3.78937e-16	4.90884e-14	DOWN		NO
AT2G04160	-0.782385	5.61362	2.25193e-10	1.18697e-08	DOWN		NO
AT2G04170	0.843768	3.85589	3.68717e-05	0.000511691	UP		NO
AT2G04390	0.413014	6.13215	0.00015163	0.0016794	UP		NO
AT2G04400	0.610454	5.24736	1.07185e-06	2.45085e-05	UP		NO
AT2G04450	1.83087	-0.0227845	2.73779e-06	5.56821e-05	UP		NO
AT2G04460	8.10523	4.74721	3.41179e-35	1.82401e-32	UP		YES	2:1547525:T-TA;exonic_variant
AT2G04480	2.20221	-1.8443	0.000679295	0.00579223	UP		NO
AT2G04495	6.47656	-2.39124	2.25409e-08	7.76279e-07	UP		NO
AT2G04515	4.76792	-3.33557	0.00586257	0.0335469	UP		NO
AT2G04530	0.47585	4.25589	0.00614527	0.0348449	UP		NO
AT2G04580	3.07282	-1.09165	7.3162e-08	2.23812e-06	UP		NO
AT2G04650	0.749464	2.9458	9.88951e-05	0.0011618	UP		NO
AT2G04660	0.54195	3.76439	0.000422253	0.00394213	UP		NO
AT2G04680	1.06322	0.408886	0.00458327	0.0276202	UP		NO
AT2G04690	0.264082	6.19835	0.00660349	0.0369271	UP		NO
AT2G04780	0.360653	5.25458	0.00845234	0.0449594	UP		NO
AT2G04795	-0.663719	2.72308	0.000888248	0.00725262	DOWN		NO
AT2G04900	0.356635	4.99779	0.00502573	0.0296504	UP		NO
AT2G04970	5.03341	-1.86183	6.90521e-09	2.67634e-07	UP		NO
AT2G05070	-0.36593	11.5277	0.000576433	0.00507388	DOWN		YES	2:1800084:ATACCTGTTACAAAATTATATTGCATTTGGTGATTAGACAGATCTAAACAACTAAGGATTACTTAAGACATATAAGAGGGAGAGAGGATAAATTTGG-A;intronic_variant&splice_donor_region_variant&splice_acceptor_region_variant&exonic_variant&splice_acceptor_variant&protein_coding
AT2G05100	-0.357431	11.9582	0.00112375	0.00882881	DOWN		YES	2:1824096:CGTACCTGTTACAAGATGAATTTGGTGATTAGACATATCTGAAAAGTTAATGATAGGTTAGGTAAGAGCCAGAGAGAGTGGATTTG-C;intronic_variant&splice_donor_region_variant&splice_acceptor_region_variant&exonic_variant&splice_acceptor_variant&protein_coding
AT2G05300	0.817672	2.34187	0.00157046	0.0116585	UP		YES	2:1931034:A-AG;splice_donor_region_variant
AT2G05510	-0.528777	8.09424	0.000184829	0.00199271	DOWN		NO
AT2G05518	0.669639	2.66028	0.000428787	0.0039917	UP		NO
AT2G05540	-0.846224	7.77133	7.58949e-10	3.58921e-08	DOWN		NO
AT2G05590	0.399208	4.22104	0.00356767	0.022515	UP		NO
AT2G05632	2.9766	2.31248	1.84893e-36	1.05549e-33	UP		NO
AT2G05710	0.471489	8.07818	0.000284524	0.0028435	UP		YES	2:2143227:G-A;protein_coding;missense;ATG>ATA;M>I
AT2G05755	0.528894	3.34524	0.00210884	0.0147606	UP		NO
AT2G05765	1.00322	1.90689	2.39585e-05	0.000353769	UP		NO
AT2G05950	-2.87027	1.12366	5.50375e-15	6.19972e-13	DOWN		YES	2:2296621:A-G;intronic_variant,2:2296614:A-T;intronic_variant,2:2296621:A-G;exonic_variant,2:2296614:A-T;exonic_variant
AT2G05995	-2.35186	-2.05363	0.000171981	0.00187157	DOWN		NO
AT2G06002	-3.03505	1.51764	1.03704e-21	2.54952e-19	DOWN		NO
AT2G06240	6.8621	-0.594289	8.37246e-28	3.09627e-25	UP		NO
AT2G06440	3.3733	-2.51235	0.000125732	0.00142585	UP		NO
AT2G06520	-0.45528	10.4704	1.44504e-05	0.000232204	DOWN		NO
AT2G06550	5.85953	-2.82305	6.55537e-06	0.000118641	UP		NO
AT2G06850	-0.623137	7.49169	1.17146e-05	0.000193791	DOWN		NO
AT2G06890	3.0987	-2.18865	0.000469892	0.00429599	UP		NO
AT2G06950	0.784377	5.19173	0.000341422	0.00331682	UP		NO
AT2G07042	-0.648837	2.9285	0.000495279	0.00448307	DOWN		NO
AT2G07180	1.17186	6.12475	4.37159e-24	1.25846e-21	UP		NO
AT2G07629	-2.35162	-1.71355	0.000156281	0.00172108	DOWN		NO
AT2G07633	-1.571	-1.35901	0.00403749	0.0249426	DOWN		NO
AT2G07667	-1.60436	0.642566	2.16708e-08	7.50149e-07	DOWN		NO
AT2G07671	-1.06173	1.1101	0.00012908	0.00145792	DOWN		NO
AT2G07674	-2.24882	0.232592	2.35464e-09	1.00388e-07	DOWN		NO
AT2G07677	-1.05532	-0.639653	0.00787683	0.0425717	DOWN		NO
AT2G07678	-1.11748	-0.326542	0.00209719	0.0146882	DOWN		NO
AT2G07680	0.542053	3.75433	0.00222876	0.0154481	UP		YES	2:3521527:G-A;protein_coding;missense;GAG>AAG;E>K
AT2G07695	-1.06794	0.374946	0.00229617	0.0158154	DOWN		NO
AT2G07696	-1.2163	-0.906532	0.00529091	0.0309273	DOWN		NO
AT2G07698	-0.768563	3.14406	5.89677e-06	0.000108057	DOWN		NO
AT2G07705	-2.7524	-2.86561	0.00846672	0.0450146	DOWN		NO
AT2G07706	-1.2123	-0.496144	0.00128233	0.00984506	DOWN		NO
AT2G07708	-1.42441	0.939619	5.62361e-06	0.000104185	DOWN		NO
AT2G07709	-0.501127	3.49157	0.00362642	0.0228302	DOWN		YES	2:3393322:T-G;exonic_variant
AT2G07712	-1.62995	-0.981189	0.00062974	0.00543157	DOWN		NO
AT2G07718	-0.75125	2.67361	0.000787761	0.0065626	DOWN		NO
AT2G07719	-1.45732	-0.764	0.00116569	0.00909172	DOWN		NO
AT2G07723	-0.929004	3.07192	5.41223e-06	0.000100768	DOWN		NO
AT2G07755	-1.37827	1.05968	1.42551e-05	0.000229505	DOWN		YES	2:3324829:C-CCT;exonic_variant
AT2G07773	-2.62164	-2.09588	0.00170439	0.0124443	DOWN		NO
AT2G07774	-2.13086	-0.686441	1.68241e-06	3.65068e-05	DOWN		NO
AT2G07775	-1.48858	-1.58559	0.00810214	0.0434812	DOWN		NO
AT2G07777	-1.48244	0.877469	1.08765e-06	2.47353e-05	DOWN		NO
AT2G07779	-1.81351	0.686477	3.14173e-10	1.60328e-08	DOWN		NO
AT2G07811	-1.66714	2.01732	1.76458e-15	2.13788e-13	DOWN		YES	2:3314501:G-A;exonic_variant
AT2G07815	-1.87842	-1.71171	0.00195466	0.013898	DOWN		NO
AT2G07826	-1.67005	-0.5215	9.90551e-05	0.00116328	DOWN		NO
AT2G09960	5.15373	-3.09816	0.00400998	0.024809	UP		YES	2:3776563:A-C;exonic_variant
AT2G09990	0.354936	5.67159	0.0023559	0.0161443	UP		NO
AT2G10410	0.378887	6.54868	0.00852461	0.0452296	UP		NO
AT2G10921	7.08246	-1.86278	3.08362e-12	2.32869e-10	UP		NO
AT2G10975	9.24861	-0.170223	3.83953e-34	1.98952e-31	UP		NO
AT2G10980	5.39833	-0.68611	1.82188e-23	4.94861e-21	UP		NO
AT2G11000	0.433989	4.88656	0.000210629	0.00221971	UP		NO
AT2G11300	1.31273	-1.10206	0.00163867	0.0120375	UP		NO
AT2G11330	2.51919	-2.97416	0.0085633	0.0453848	UP		NO
AT2G11810	4.36505	2.18005	1.15739e-06	2.62153e-05	UP		NO
AT2G11910	0.419983	6.10593	0.00183863	0.0132492	UP		NO
AT2G12440	3.41325	-1.93852	8.41535e-06	0.00014747	UP		NO
AT2G12462	0.640023	3.09164	0.00183556	0.0132356	UP		NO
AT2G12490	0.62232	2.38079	0.000792371	0.00659188	UP		NO
AT2G12646	1.06161	1.07119	0.000905338	0.00737608	UP		NO
AT2G13360	-0.429762	10.8416	0.00057808	0.00507916	DOWN		YES	2:5540329:TCTGTATGTAAACCCTAATGTAAGTGAGATTTAAAACAGAGAAAACACAAAAGAAAAACAGATTATTTGTGAGGAATTAATGAC-T;intronic_variant&splice_acceptor_region_variant&splice_acceptor_variant,2:5540329:TCTGTATGTAAACCCTAATGTAAGTGAGATTTAAAACAGAGAAAACACAAAAGAAAAACAGATTATTTGTGAGGAATTAATGAC-T;exonic_variant,2:5540329:TCTGTATGTAAACCCTAATGTAAGTGAGATTTAAAACAGAGAAAACACAAAAGAAAAACAGATTATTTGTGAGGAATTAATGAC-T;intronic_variant&spli…
AT2G13420	0.878928	1.24811	0.000251131	0.00257093	UP		NO
AT2G13431	2.39996	-2.0348	0.00109933	0.00866886	UP		NO
AT2G13450	7.20657	-1.92132	2.42952e-10	1.27063e-08	UP		NO
AT2G13460	4.7581	-3.23636	0.0040001	0.0247524	UP		NO
AT2G13547	1.5439	-0.983069	0.00301663	0.0196677	UP		NO
AT2G13570	1.17202	-0.324207	0.00415495	0.0254775	UP		NO
AT2G13760	5.5411	-2.97709	0.000381657	0.00363535	UP		NO
AT2G13770	6.96965	-2.08158	1.28455e-11	8.653e-10	UP		NO
AT2G13790	0.602404	4.61956	1.78857e-05	0.000276081	UP		NO
AT2G13810	5.54185	-1.73573	1.30177e-09	5.89311e-08	UP		NO
AT2G13820	0.605171	2.84676	0.00536798	0.0312747	UP		NO
AT2G13830	6.21155	-2.52997	1.05231e-05	0.000178643	UP		YES	2:5786655:C-T;exonic_variant
AT2G13860	6.43583	-2.41816	5.06122e-08	1.60213e-06	UP		YES	2:5812637:C-A;exonic_variant
AT2G14060	-1.79976	-1.42523	0.00102245	0.0081566	DOWN		NO
AT2G14090	0.634596	3.52164	0.000287685	0.00287097	UP		NO
AT2G14120	0.322181	5.85165	0.0015816	0.0117161	UP		NO
AT2G14180	2.44026	-2.062	0.00142353	0.0107381	UP		NO
AT2G14260	0.684285	6.85963	2.08399e-12	1.6173e-10	UP		NO
AT2G14460	0.502487	2.79906	0.00387981	0.0241716	UP		NO
AT2G14520	0.993088	2.00939	1.19128e-05	0.00019678	UP		NO
AT2G14560	10.4003	3.54935	1.26831e-43	1.09533e-40	UP		NO
AT2G14610	8.67039	3.24845	2.08821e-45	2.23211e-42	UP		NO
AT2G14620	1.70239	0.635592	2.25748e-06	4.69346e-05	UP		NO
AT2G14680	0.544207	4.72363	3.48637e-05	0.000486632	UP		NO
AT2G14750	0.651621	6.06282	1.0754e-06	2.45562e-05	UP		NO
AT2G14820	1.04279	0.488501	0.000977528	0.00786456	UP		NO
AT2G14878	0.96403	6.6931	3.48559e-20	7.33739e-18	UP		NO
AT2G14900	1.31521	2.44317	2.43059e-07	6.52308e-06	UP		NO
AT2G14910	0.263022	8.02623	0.00725063	0.0399295	UP		NO
AT2G15000	1.15118	2.96579	1.78501e-07	4.95197e-06	UP		NO
AT2G15030	1.14306	2.15294	1.16674e-06	2.64092e-05	UP		NO
AT2G15040	2.50655	0.559288	3.29491e-09	1.36824e-07	UP		NO
AT2G15042	2.65733	2.08149	1.26159e-12	1.01898e-10	UP		NO
AT2G15080	1.61693	4.96501	4.28908e-26	1.4446e-23	UP		NO
AT2G15090	-0.383425	6.80951	0.000577994	0.00507916	DOWN		NO
AT2G15128	1.33355	0.875505	1.2805e-05	0.000209158	UP		NO
AT2G15220	1.79518	2.1461	3.86788e-08	1.26726e-06	UP		NO
AT2G15292	0.40984	4.22135	0.00916898	0.0479461	UP		NO
AT2G15300	1.07962	1.069	0.000571663	0.00504869	UP		NO
AT2G15370	1.17634	0.95729	0.000588411	0.00514745	UP		NO
AT2G15390	2.0436	3.40725	1.11336e-12	9.05772e-11	UP		NO
AT2G15400	1.05841	-0.338471	0.00553708	0.0320327	UP		NO
AT2G15510	6.25004	-0.412892	6.26539e-15	7.03415e-13	UP		NO
AT2G15520	5.0214	-2.10492	3.40572e-08	1.1279e-06	UP		NO
AT2G15555	7.61058	-1.22193	9.74655e-14	9.27327e-12	UP		NO
AT2G15760	1.06176	0.461029	0.000219563	0.00229306	UP		NO
AT2G15780	4.89757	-3.23642	0.00920539	0.0480991	UP		NO
AT2G15880	-0.852445	5.04537	1.75856e-05	0.000272197	DOWN		NO
AT2G15890	-0.788101	7.82878	1.00966e-06	2.32283e-05	DOWN		NO
AT2G16060	1.85655	4.57457	4.42123e-16	5.68364e-14	UP		NO
AT2G16140	1.64661	-0.571088	0.00535419	0.0312213	UP		YES	2:7007838:C-CT;exonic_variant,2:7005448:A-G;exonic_variant,2:7007427:A-G;intronic_variant,2:7007427:A-G;exonic_variant,2:7005387:T-C;exonic_variant,2:7007835:C-T;intronic_variant,2:7007838:C-CT;intronic_variant,2:7007835:C-T;exonic_variant
AT2G16280	-0.40011	6.06918	0.000186765	0.0020078	DOWN		NO
AT2G16385	1.62665	-0.548219	6.12353e-05	0.00077976	UP		NO
AT2G16460	0.518369	3.59225	0.00057282	0.00505321	UP		NO
AT2G16580	1.11595	-0.569188	0.00575395	0.0330602	UP		NO
AT2G16586	0.516243	5.6792	3.53172e-05	0.00049174	UP		NO
AT2G16600	0.550826	8.52288	5.09594e-07	1.25557e-05	UP		NO
AT2G16650	0.653832	3.69176	2.54866e-05	0.000371929	UP		NO
AT2G16760	0.938741	1.20891	0.000193202	0.00206776	UP		NO
AT2G16870	0.989841	1.68795	3.55355e-05	0.000494575	UP		NO
AT2G16890	1.38195	1.78194	2.29455e-08	7.88599e-07	UP		NO
AT2G16900	0.354972	4.44212	0.00754596	0.0411855	UP		NO
AT2G16930	0.356686	4.64868	0.00288001	0.018953	UP		YES	2:7341542:G-A;protein_coding;sense;AGG>AGA;R>R
AT2G16970	1.10432	0.706768	8.56886e-05	0.0010289	UP		NO
AT2G17010	-2.08157	-2.11905	0.00209187	0.0146727	DOWN		NO
AT2G17036	1.22667	2.48522	2.35687e-06	4.87603e-05	UP		NO
AT2G17040	2.6201	1.60701	5.24742e-11	3.19022e-09	UP		NO
AT2G17070	1.6927	-0.538026	4.83825e-05	0.000644864	UP		NO
AT2G17080	1.37362	0.622488	2.24314e-06	4.66942e-05	UP		NO
AT2G17130	0.518511	4.6055	0.00016344	0.00178787	UP		NO
AT2G17230	-1.55828	5.54121	4.99435e-15	5.7022e-13	DOWN		NO
AT2G17250	0.640721	4.20357	1.49683e-05	0.000239159	UP		YES	2:7499969:G-A;intronic_variant
AT2G17280	1.09931	2.78594	9.68297e-06	0.000166088	UP		YES	2:7513927:G-A;protein_coding;missense;GGG>GAG;G>E
AT2G17290	0.357879	5.33493	0.00433428	0.0263936	UP		NO
AT2G17320	0.647908	4.81273	3.19009e-08	1.05753e-06	UP		NO
AT2G17330	2.37381	-2.31208	0.000600964	0.00523567	UP		NO
AT2G17370	0.402081	3.97797	0.00752913	0.0411403	UP		NO
AT2G17420	0.492701	6.66202	1.99537e-06	4.2268e-05	UP		NO
AT2G17430	0.755273	1.8793	0.000525212	0.00470219	UP		NO
AT2G17442	0.868867	1.36739	0.00369684	0.0232128	UP		NO
AT2G17525	0.512768	2.95186	0.00407134	0.0250835	UP		NO
AT2G17530	0.397691	4.80554	0.000970417	0.00781368	UP	YES	NO
AT2G17690	9.15851	4.68854	5.99386e-235	1.0094e-230	UP		NO
AT2G17720	0.8672	5.36764	1.50455e-09	6.72077e-08	UP		NO
AT2G17740	3.27267	-0.140598	7.29461e-09	2.80148e-07	UP		NO
AT2G17760	0.399542	4.89955	0.000597394	0.0052113	UP		NO
AT2G17800	0.375481	5.04574	0.00228492	0.0157605	UP		NO
AT2G17820	0.336159	5.30561	0.00295381	0.0193434	UP		NO
AT2G17850	3.62701	1.59266	1.70237e-13	1.57521e-11	UP		NO
AT2G17880	0.545077	4.85706	0.00035058	0.0033921	UP		NO
AT2G18020	0.381092	8.23191	0.00258427	0.0173519	UP		NO
AT2G18050	-1.11128	7.59761	1.34852e-09	6.0884e-08	DOWN		NO
AT2G18130	5.33045	-3.05608	0.000577483	0.00507916	UP		NO
AT2G18150	3.12651	0.985125	8.48951e-23	2.18271e-20	UP		NO
AT2G18160	0.549189	6.76519	7.24788e-07	1.72642e-05	UP		NO
AT2G18193	2.4695	1.882	5.46451e-20	1.1021e-17	UP		NO
AT2G18210	2.06262	0.0921437	9.40103e-07	2.1852e-05	UP		NO
AT2G18220	0.682984	3.8034	2.67952e-05	0.000388502	UP		NO
AT2G18230	0.594613	4.48815	1.25729e-05	0.000205967	UP		NO
AT2G18240	0.374249	4.11259	0.00879122	0.046308	UP		NO
AT2G18260	-1.10274	2.3432	1.03843e-07	3.0761e-06	DOWN		NO
AT2G18280	-0.319794	7.55126	0.0035412	0.0223605	DOWN		NO
AT2G18290	0.591059	4.18885	0.000109092	0.00126658	UP		NO
AT2G18300	-0.535245	6.3559	6.03129e-05	0.000770345	DOWN		NO
AT2G18328	1.11211	1.85584	6.80567e-05	0.000849913	UP		NO
AT2G18330	0.628691	3.50953	0.000230518	0.00239116	UP		NO
AT2G18390	0.462053	4.22167	0.00119527	0.00927021	UP		NO
AT2G18400	0.789536	3.2569	0.000128706	0.00145468	UP		NO
AT2G18450	1.11962	-0.0705465	0.00554664	0.032066	UP		NO
AT2G18490	-5.57941	-2.78396	0.000120493	0.00137524	DOWN		NO
AT2G18540	2.26518	-1.82761	0.00111849	0.00879365	UP		NO
AT2G18550	-1.48666	0.717165	1.97287e-07	5.41993e-06	DOWN		NO
AT2G18600	-2.38918	0.968659	4.48513e-17	6.45572e-15	DOWN		YES	2:8074275:T-TG;intronic_variant
AT2G18660	6.42194	1.07379	4.7454e-17	6.71554e-15	UP		NO
AT2G18680	1.55633	0.117377	0.000355763	0.00343042	UP		NO
AT2G18690	1.21113	4.78156	0.000194053	0.00207621	UP		NO
AT2G18700	-0.554844	7.44682	3.98426e-05	0.000547244	DOWN		NO
AT2G18740	0.565472	4.75721	1.16074e-05	0.00019287	UP	YES	NO
AT2G18900	0.922306	3.94377	7.06708e-09	2.72966e-07	UP		NO
AT2G18970	1.38208	-1.63858	0.00481884	0.0286958	UP		NO
AT2G19150	0.823683	0.0109045	0.00849326	0.045113	UP		YES	2:8307513:A-AG;exonic_variant
AT2G19170	0.72101	3.73367	0.000307786	0.00303648	UP		NO
AT2G19190	2.94265	2.00144	6.89575e-11	4.08901e-09	UP		NO
AT2G19400	0.525925	2.75302	0.00561364	0.0323811	UP		NO
AT2G19440	1.52052	-1.21625	0.000758022	0.00634782	UP		NO
AT2G19460	0.693035	2.31731	0.00112327	0.00882881	UP		NO
AT2G19530	0.73613	0.780515	0.00906038	0.047474	UP		NO
AT2G19540	0.352465	5.71837	0.00229476	0.0158089	UP		NO
AT2G19570	0.723728	4.77499	1.61018e-05	0.000253541	UP		NO
AT2G19590	1.79146	3.64514	7.73195e-14	7.48262e-12	UP		NO
AT2G19660	0.705214	1.52907	0.00290982	0.0191156	UP		YES	2:8497262:G-A;protein_coding;stop-gain;CAA>TAA;Q>*
AT2G19670	1.18476	2.41366	4.80676e-07	1.19393e-05	UP		NO
AT2G19680	0.483144	4.16699	0.000249301	0.00255297	UP		NO
AT2G19720	0.767749	2.47942	0.000126096	0.00142936	UP		NO
AT2G19730	0.398375	7.29316	0.000430516	0.00400337	UP		NO
AT2G19750	0.421965	5.41621	0.000715721	0.00604923	UP		NO
AT2G19760	0.406477	6.64029	0.000496872	0.00449507	UP		NO
AT2G19880	0.364964	4.96239	0.00475406	0.0283904	UP		NO
AT2G19900	-1.60667	2.76689	9.26409e-14	8.8392e-12	DOWN		NO
AT2G19910	-1.22207	1.83758	1.12618e-06	2.55945e-05	DOWN		NO
AT2G19920	-1.49752	0.383488	1.30145e-05	0.000212067	DOWN		YES	2:8603510:T-TCC;exonic_variant,2:8603510:T-TCC;exonic_variant&protein_coding
AT2G19930	-0.612323	3.62398	0.000320561	0.00314318	DOWN		NO
AT2G19970	2.19743	0.977217	6.96767e-09	2.69435e-07	UP		NO
AT2G19990	1.81537	-0.0331744	2.29021e-05	0.000339977	UP		NO
AT2G20010	0.330722	4.5331	0.00815078	0.0436796	UP		NO
AT2G20020	0.423115	5.36062	0.00256374	0.0172457	UP		NO
AT2G20050	-0.284938	6.58433	0.00330597	0.0212052	DOWN		NO
AT2G20060	0.554455	5.05122	6.2244e-05	0.00078962	UP		NO
AT2G20080	0.734887	1.6314	0.00338554	0.0216209	UP		NO
AT2G20142	2.02033	-0.239927	4.41148e-05	0.000595285	UP		NO
AT2G20180	-0.291339	5.81902	0.00739373	0.0405187	DOWN		NO
AT2G20190	-0.284583	6.38542	0.00521681	0.0305656	DOWN		NO
AT2G20370	0.373859	4.79057	0.00275694	0.0183027	UP		NO
AT2G20390	0.684069	3.66542	0.000737455	0.006208	UP		NO
AT2G20420	0.294294	6.76504	0.00598989	0.0341652	UP		NO
AT2G20440	0.453489	3.30681	0.00507237	0.0298601	UP		NO
AT2G20450	0.528111	5.53834	3.14202e-05	0.000444835	UP		NO
AT2G20490	0.526771	4.49195	0.00163503	0.012016	UP		NO
AT2G20515	0.879048	2.14708	0.00183837	0.0132492	UP		NO
AT2G20520	1.40366	2.18513	0.00282844	0.018672	UP		NO
AT2G20530	0.384418	5.13279	0.00734279	0.0403214	UP		NO
AT2G20562	1.01397	0.547979	0.00299973	0.0195764	UP		NO
AT2G20630	0.43833	6.11763	0.000245378	0.00252046	UP		NO
AT2G20650	0.74598	3.52919	7.66404e-06	0.000136074	UP		NO
AT2G20720	1.17769	1.78239	3.31377e-05	0.000466406	UP		NO
AT2G20740	-0.28651	5.17531	0.00845065	0.0449576	DOWN		NO
AT2G20800	4.99913	-1.88057	2.98535e-10	1.53556e-08	UP		NO
AT2G20820	0.471664	6.51589	4.18066e-06	7.99142e-05	UP		NO
AT2G20835	-0.894596	0.553765	0.00172607	0.0125699	DOWN		NO
AT2G20850	0.941146	5.0598	6.69532e-10	3.21232e-08	UP		NO
AT2G20940	0.693552	2.16671	0.00443976	0.0268997	UP		NO
AT2G20950	0.429515	5.09068	0.000136804	0.00153415	UP		NO
AT2G20980	0.680307	1.3808	0.00403583	0.0249369	UP		NO
AT2G21045	0.707944	3.69787	0.00132584	0.0101122	UP		NO
AT2G21100	1.36569	1.62943	1.30885e-08	4.76576e-07	UP		YES	2:9048524:G-GT;intronic_variant,2:9048524:G-GT;exonic_variant
AT2G21160	0.31922	6.67841	0.00343675	0.0218567	UP		NO
AT2G21185	-0.481128	4.65984	0.000599036	0.00522156	DOWN		NO
AT2G21195	0.540783	3.85267	0.000106487	0.00123975	UP		NO
AT2G21200	-1.08035	0.127774	0.000613269	0.00531264	DOWN		NO
AT2G21210	-0.524766	4.91434	0.00197156	0.0139857	DOWN		NO
AT2G21350	1.32094	0.458316	3.25642e-05	0.00045968	UP		NO
AT2G21460	2.72895	-0.332425	7.10858e-10	3.3817e-08	UP		NO
AT2G21530	-0.267283	6.75405	0.00832667	0.0444329	DOWN		NO
AT2G21550	0.688479	1.61328	0.0032801	0.0210753	UP		NO
AT2G21590	0.642344	4.25616	0.000117721	0.00135047	UP		YES	2:9240518:T-TC;intronic_variant
AT2G21640	1.94208	1.70601	3.93088e-13	3.43885e-11	UP		NO
AT2G21650	3.43404	-2.97267	0.00543247	0.0315444	UP		NO
[truncated: 4,519 more rows]

## Sheet: hgf1-8
Gene ID	logFC	logCPM	PValue	FDR	Direction of change	Koncz Category	has SNP/indels?	SNPs/indels
AT1G01120	-0.647943	5.56418	1.51323e-05	0.000557628	DOWN		NO
AT1G01250	0.966875	3.29459	1.18736e-07	7.72036e-06	UP		NO
AT1G01300	-0.688884	5.12024	0.000153142	0.00396979	DOWN		NO
AT1G01420	0.608896	3.47765	0.000192284	0.00479207	UP		NO
AT1G01520	0.852224	3.19957	0.0031239	0.0458459	UP		NO
AT1G01540	-0.406148	6.25839	0.000312828	0.00720681	DOWN		NO
AT1G01620	-0.622477	8.57115	6.56283e-08	4.62433e-06	DOWN		NO
AT1G01650	-0.363004	5.46835	0.00184594	0.0303431	DOWN		NO
AT1G01770	-0.480376	5.58904	5.28128e-05	0.00161561	DOWN		NO
AT1G01830	0.605353	4.84815	5.92876e-07	3.27893e-05	UP		NO
AT1G02205	0.537574	7.13176	0.00191749	0.031351	UP		NO
AT1G02380	-1.58378	3.07212	1.14835e-11	1.89641e-09	DOWN		NO
AT1G02390	1.19606	3.26117	2.20621e-05	0.000774034	UP		NO
AT1G02610	-1.35261	4.51698	7.69125e-12	1.30175e-09	DOWN		NO
AT1G02620	-1.80034	1.02765	4.10508e-06	0.000183616	DOWN		NO
AT1G02640	-1.30738	4.55026	3.83665e-18	1.84603e-15	DOWN		NO
AT1G02660	-1.97365	4.94633	7.62268e-42	2.5674e-38	DOWN		NO
AT1G02770	1.26331	1.15752	4.12844e-06	0.000184378	UP		NO
AT1G02860	-0.537439	4.53288	0.000109318	0.00298617	DOWN		NO
AT1G03090	-1.34605	6.72264	3.91638e-21	2.63815e-18	DOWN		NO
AT1G03140	-0.326063	5.58095	0.00173883	0.0289785	DOWN	YES	NO
AT1G03300	-1.08398	2.62167	1.71244e-06	8.35951e-05	DOWN		NO
AT1G03457	-0.713228	2.88957	0.00139353	0.0244074	DOWN	YES	YES	1:863646:G-GA;intronic_variant,1:863622:G-GA;intronic_variant,1:863622:G-GA;exonic_variant,1:863646:G-GA;exonic_variant
AT1G03470	-1.01471	3.22151	4.79504e-06	0.000209742	DOWN		NO
AT1G03580	-1.54286	2.09542	5.8592e-09	5.42153e-07	DOWN		NO
AT1G03590	-0.417021	4.89789	0.000237051	0.00570294	DOWN		YES	1:895475:G-GA;splice_acceptor_region_variant
AT1G03610	-0.85145	6.33955	1.60866e-12	2.94463e-10	DOWN		NO
AT1G03870	-1.50771	6.14284	1.19989e-18	6.12328e-16	DOWN		NO
AT1G03970	-0.364348	4.69151	0.0019018	0.0311701	DOWN		NO
AT1G04240	-0.959635	4.97922	1.33457e-12	2.49348e-10	DOWN		NO
AT1G04250	0.446202	5.54889	0.000209617	0.00513462	UP		NO
AT1G04330	-1.14157	1.12813	9.37569e-05	0.00263812	DOWN		NO
AT1G04360	-0.859891	2.39107	0.000122241	0.00328549	DOWN		NO
AT1G04430	-0.40797	6.40151	0.000110218	0.00300587	DOWN		NO
AT1G04660	3.47922	-2.09592	0.000234253	0.00565583	UP		NO
AT1G04770	-0.813944	4.81902	9.7498e-07	5.08333e-05	DOWN		NO
AT1G05020	-1.4411	1.75258	2.35777e-08	1.87292e-06	DOWN		NO
AT1G05170	0.779867	4.6142	3.30307e-09	3.23404e-07	UP		NO
AT1G05300	-0.627839	2.82679	0.00293413	0.0436973	DOWN		NO
AT1G05310	0.935998	2.75975	2.1222e-05	0.000753313	UP		NO
AT1G05330	-2.6553	-2.07749	0.000208012	0.00510105	DOWN		NO
AT1G05340	-0.84541	3.80934	7.54684e-07	4.07348e-05	DOWN		NO
AT1G05385	0.424674	4.40042	0.00101192	0.0188928	UP		NO
AT1G05540	1.1584	0.170459	0.000412969	0.00909692	UP		NO
AT1G05630	-0.577604	4.10233	3.3318e-05	0.0010991	DOWN		NO
AT1G05660	0.864372	1.33804	0.000646967	0.0131585	UP		NO
AT1G05690	0.541319	2.75363	0.00258351	0.0394627	UP		NO
AT1G05870	0.72167	5.57972	4.30613e-06	0.000190584	UP		NO
AT1G06000	0.508984	3.87976	0.00267381	0.0406759	UP		NO
AT1G06100	2.63634	1.65236	2.76042e-21	1.93696e-18	UP		NO
AT1G06160	-1.70386	1.97213	0.000902648	0.0172767	DOWN		NO
AT1G06390	-0.361573	6.18226	0.00121076	0.0218775	DOWN		NO
AT1G06570	-0.335725	7.17309	0.00267153	0.0406759	DOWN		NO
AT1G06640	0.486013	6.05492	3.66962e-05	0.00119302	UP		NO
AT1G06980	1.0477	0.888305	0.000152031	0.00394799	UP		NO
AT1G07010	0.54836	6.55924	5.60373e-06	0.000239517	UP		NO
AT1G07090	0.817751	2.23377	0.000362869	0.00817512	UP		NO
AT1G07280	0.390217	6.52749	0.00177325	0.0294063	UP		NO
AT1G07430	1.13258	3.81775	1.90566e-06	9.16922e-05	UP		NO
AT1G07450	1.05931	2.2142	7.27312e-07	3.95744e-05	UP		NO
AT1G07530	-0.426688	5.90361	5.43809e-05	0.00165288	DOWN		NO
AT1G07720	0.372922	5.3736	0.0024215	0.0374982	UP		NO
AT1G07985	-0.804546	3.10223	0.00113373	0.0206965	DOWN		NO
AT1G08230	0.358507	4.57352	0.00257228	0.0393805	UP		NO
AT1G08510	-0.37672	6.91409	0.0001627	0.00417039	DOWN		NO
AT1G08570	0.499539	7.0055	0.000297504	0.00692963	UP		NO
AT1G08630	-2.37732	3.68481	2.21703e-17	9.21873e-15	DOWN		NO
AT1G08830	-0.924062	6.80851	5.54064e-08	3.97052e-06	DOWN		NO
AT1G08920	-1.21072	4.78698	2.65079e-13	5.411e-11	DOWN		NO
AT1G08930	-1.45536	6.00588	2.19794e-10	2.81478e-08	DOWN		NO
AT1G08940	-0.904945	2.81791	7.42039e-06	0.000301479	DOWN		NO
AT1G08980	-0.614684	6.22368	7.60071e-08	5.23516e-06	DOWN		NO
AT1G08990	0.60212	2.7446	0.00288679	0.0431941	UP		NO
AT1G09070	-0.919357	6.94306	6.92161e-09	6.25005e-07	DOWN		NO
AT1G09310	0.812458	9.59319	1.14863e-11	1.89641e-09	UP		NO
AT1G09420	-0.515945	3.99182	0.00112193	0.0205256	DOWN		NO
AT1G09460	-0.73085	2.25983	0.00330634	0.047856	DOWN		NO
AT1G09480	-1.05478	1.64956	0.000399663	0.00885013	DOWN		NO
AT1G09530	-0.395811	6.89635	0.000309567	0.00714635	DOWN		NO
AT1G09570	-0.343345	7.80117	0.00239601	0.0372232	DOWN		NO
AT1G09575	-0.956806	2.7219	1.29673e-06	6.52842e-05	DOWN		NO
AT1G09710	-0.576261	3.05471	0.00288847	0.0431973	DOWN		NO
AT1G09740	-0.580888	4.60588	1.31364e-05	0.000491609	DOWN		NO
AT1G10020	-1.34333	4.17456	5.25063e-12	9.1158e-10	DOWN		NO
AT1G10060	-0.527494	4.89602	2.72141e-05	0.00092028	DOWN		NO
AT1G10070	-1.55443	4.75613	7.84082e-11	1.09127e-08	DOWN		NO
AT1G10140	-0.961143	5.03703	1.03192e-10	1.40713e-08	DOWN		NO
AT1G10550	-3.3138	1.8778	4.80346e-16	1.55563e-13	DOWN		NO
AT1G10585	0.748275	2.7668	0.000220057	0.00535143	UP		NO
AT1G11185	-1.28418	0.634352	0.000165403	0.0042268	DOWN		NO
AT1G11260	-1.87229	8.89622	3.34439e-17	1.3098e-14	DOWN		NO
AT1G11310	-0.360528	6.69983	0.00160828	0.0273578	DOWN		NO
AT1G11380	-0.856606	3.28571	8.25005e-06	0.000330012	DOWN		NO
AT1G11410	0.372029	5.10707	0.00214743	0.0342298	UP		NO
AT1G11460	-2.00441	-1.59096	0.00252173	0.0387652	DOWN		NO
AT1G11700	1.17261	3.51589	4.19574e-11	6.17104e-09	UP		NO
AT1G11785	1.27442	0.546862	0.00109019	0.0200972	UP		NO
AT1G11840	0.455854	7.89456	2.12783e-05	0.000753601	UP		NO
AT1G12090	-0.315387	9.84631	0.00238179	0.0370536	DOWN		NO
AT1G12220	-0.566278	4.1865	2.79224e-05	0.000936709	DOWN		NO
AT1G12230	-0.298922	6.74157	0.00253905	0.0389657	DOWN		NO
AT1G12240	-0.789755	7.87317	1.28154e-06	6.46163e-05	DOWN		NO
AT1G12270	-0.329574	5.42416	0.00244605	0.0378261	DOWN		NO
AT1G12280	0.703657	3.50848	8.81135e-06	0.000350798	UP		NO
AT1G12450	-0.788652	3.34908	4.55902e-06	0.000200199	DOWN		NO
AT1G12520	-1.20201	6.18785	5.91579e-17	2.18956e-14	DOWN		NO
AT1G12650	-0.364834	4.53022	0.00322029	0.0469739	DOWN		NO
AT1G12710	-0.592396	3.39429	0.00171585	0.0287378	DOWN		NO
AT1G12780	-1.10567	7.01703	1.4023e-21	1.07343e-18	DOWN		NO
AT1G12805	1.13452	2.08335	0.000806393	0.0157908	UP		NO
AT1G12990	-0.861767	4.95404	2.80992e-12	5.00745e-10	DOWN		NO
AT1G13360	0.717196	6.19797	2.0934e-09	2.15111e-07	UP		NO
AT1G13448	0.908805	2.15504	9.30152e-05	0.00262602	UP		NO
AT1G13670	-0.917961	3.48221	9.19031e-07	4.84411e-05	DOWN		NO
AT1G13700	-1.13417	4.23068	3.94463e-11	5.85283e-09	DOWN		NO
AT1G13750	0.831592	3.4988	0.00142305	0.0248396	UP		NO
AT1G14120	0.823965	3.47914	0.000266044	0.00627934	UP		YES	1:4833887:G-A;protein_coding;missense;CAT>TAT;H>Y
AT1G14130	-0.604963	3.02612	0.00103224	0.0192081	DOWN		NO
AT1G14185	0.783247	1.11015	0.00174372	0.0290417	UP		NO
AT1G14240	1.37905	1.68944	2.22607e-05	0.000780191	UP		NO
AT1G14280	-0.544668	6.41319	3.13134e-07	1.84705e-05	DOWN		NO
AT1G14330	-0.619984	4.1276	6.43916e-05	0.00190578	DOWN		NO
AT1G14687	-1.33177	0.577134	8.08078e-06	0.000324397	DOWN		NO
AT1G14690	-0.440362	5.63127	0.00013311	0.00353851	DOWN		NO
AT1G14720	-0.3916	6.06082	0.000283003	0.00663313	DOWN		NO
AT1G14740	-0.497778	6.70662	1.07826e-06	5.51928e-05	DOWN		NO
AT1G14890	-0.508248	6.273	0.000719272	0.014403	DOWN		NO
AT1G14900	-0.600885	5.75617	8.61712e-05	0.00246169	DOWN		YES	1:5138240:G-A;exonic_variant
AT1G14930	2.51073	-2.65034	0.00256354	0.0392823	UP		NO
AT1G14960	1.2206	1.50939	6.1068e-05	0.00181539	UP		NO
AT1G15010	-2.16558	0.689137	1.75355e-12	3.17535e-10	DOWN		NO
AT1G15040	-1.51291	3.39807	0.000241295	0.00578849	DOWN		NO
AT1G15100	1.12731	3.97434	7.05818e-14	1.62826e-11	UP		NO
AT1G15260	0.637686	4.76502	1.27424e-05	0.000478992	UP		NO
AT1G15290	-0.611823	7.93162	1.83126e-08	1.48623e-06	DOWN		NO
AT1G15460	0.800247	0.693567	0.00314517	0.0461378	UP		NO
AT1G15625	2.39271	-0.133584	6.38598e-13	1.25781e-10	UP		NO
AT1G15670	-0.895049	5.04166	2.6799e-05	0.000908981	DOWN		NO
AT1G15750	-0.301554	7.38941	0.002706	0.041073	DOWN		NO
AT1G15800	-0.66572	3.22561	8.91885e-05	0.00253285	DOWN		NO
AT1G15820	0.440574	11.5636	1.1228e-05	0.000430227	UP		NO
AT1G16110	-0.625102	4.14931	0.000443846	0.00967584	DOWN		YES	1:5520131:G-A;exonic_variant,1:5520131:G-A;protein_coding;stop-gain;TGG>TGA;W>*
AT1G16410	1.25811	5.91888	4.11506e-08	3.03946e-06	UP		NO
AT1G16730	0.564199	3.84313	0.000523018	0.0110444	UP		NO
AT1G16850	0.827397	2.05048	0.00030307	0.0070398	UP		NO
AT1G17100	0.620522	5.86488	5.91333e-07	3.27577e-05	UP		NO
AT1G17190	0.643621	3.98391	0.000156278	0.0040334	UP		NO
AT1G17345	-1.71779	0.419712	1.25134e-07	8.08953e-06	DOWN		NO
AT1G17380	-1.86557	1.10207	0.00205557	0.0331897	DOWN		NO
AT1G17460	-0.590392	2.66853	0.00215355	0.0342949	DOWN		NO
AT1G17550	0.359373	6.03766	0.000585928	0.0121593	UP		NO
AT1G17620	-0.793069	5.02417	5.12499e-10	6.20916e-08	DOWN		NO
AT1G17860	-0.410029	6.05582	0.00253367	0.0389131	DOWN		NO
AT1G17970	-0.466829	4.40651	0.000470288	0.0101472	DOWN		NO
AT1G18020	-1.90615	4.96808	4.84248e-19	2.63064e-16	DOWN		NO
AT1G18060	0.584275	6.48658	3.74158e-07	2.15788e-05	UP		NO
AT1G18180	-0.98549	2.12155	3.48577e-05	0.00114541	DOWN		NO
AT1G18300	-0.843151	3.25915	0.000110422	0.00300901	DOWN		NO
AT1G18570	-0.723594	4.38288	0.000184184	0.00461702	DOWN		NO
AT1G18620	-0.311073	6.8261	0.00304763	0.044984	DOWN		NO
AT1G18740	-0.818856	4.76971	9.52907e-07	4.98525e-05	DOWN		NO
AT1G18810	1.08433	3.72966	7.00219e-06	0.00028726	UP		NO
AT1G18990	0.850462	0.482397	0.00178392	0.029511	UP		NO
AT1G19050	-1.07774	3.37038	0.000657382	0.0133301	DOWN		NO
AT1G19140	-0.387092	4.77523	0.000764296	0.0151138	DOWN		NO
AT1G19180	-1.59713	4.75743	2.52823e-06	0.00011842	DOWN		NO
AT1G19380	-1.26028	2.60064	0.000718784	0.014403	DOWN		NO
AT1G19510	-1.90885	0.860866	1.47969e-07	9.38556e-06	DOWN		NO
AT1G19540	-1.03611	1.69258	1.24645e-05	0.000470121	DOWN		NO
AT1G19610	-1.47216	0.93716	2.08594e-05	0.000741885	DOWN		NO
AT1G19770	-0.572611	6.2366	9.88079e-05	0.00274357	DOWN		NO
AT1G19870	-0.294267	6.46214	0.003288	0.047652	DOWN		NO
AT1G19950	0.713112	2.20146	0.00145136	0.0251498	UP		NO
AT1G19960	1.20334	2.32263	0.00134348	0.0237781	UP		NO
AT1G20020	-0.371069	9.10169	0.00139158	0.0243859	DOWN		NO
AT1G20070	0.840239	2.97834	5.83314e-05	0.00175103	UP		NO
AT1G20090	-0.418935	5.97911	0.000256242	0.00608765	DOWN		NO
AT1G20160	-0.834115	5.15289	4.63722e-05	0.00145425	DOWN		NO
AT1G20330	-0.885998	6.48106	5.09786e-14	1.21774e-11	DOWN		NO
AT1G20350	-1.37127	0.389512	0.00025699	0.00609983	DOWN		NO
AT1G20470	1.49059	1.54208	9.3186e-10	1.04272e-07	UP		NO
AT1G20510	-1.14724	4.72511	0.000144128	0.00377185	DOWN		NO
AT1G20630	-0.696439	5.59005	0.000124257	0.00332917	DOWN		NO
AT1G20970	-0.2976	6.33611	0.00339046	0.0488008	DOWN		NO
AT1G21065	0.335015	6.59058	0.00153105	0.0262964	UP		NO
AT1G21080	-0.50318	5.38829	3.56302e-06	0.000161952	DOWN		NO
AT1G21250	1.80071	3.99306	1.22526e-08	1.0317e-06	UP		NO
AT1G21310	0.606758	9.18718	0.00317085	0.0464337	UP		NO
AT1G21400	-0.690861	7.71687	3.66703e-08	2.75076e-06	DOWN		NO
AT1G21450	-0.390645	5.94791	0.000721062	0.0144131	DOWN		NO
AT1G21460	-0.748437	4.49892	2.11549e-06	0.000100638	DOWN		NO
AT1G21470	-2.31746	-1.45634	0.000235043	0.00566677	DOWN		NO
AT1G21590	0.458648	6.55208	5.80486e-05	0.0017441	UP		NO
AT1G21610	-0.428266	5.25514	9.85358e-05	0.00273827	DOWN		YES	1:7574358:G-A;intronic_variant
AT1G21670	-0.678395	5.34025	1.57198e-08	1.29769e-06	DOWN		NO
AT1G21680	-0.429645	7.30163	0.00013929	0.00366804	DOWN		NO
AT1G21830	-0.608558	5.34728	9.92411e-07	5.14237e-05	DOWN		NO
AT1G21910	-2.43957	4.92635	3.27943e-23	3.30739e-20	DOWN		NO
AT1G21970	-2.96635	-2.14446	0.0019129	0.0313216	DOWN		NO
AT1G22190	-0.56312	6.03349	9.1858e-07	4.84411e-05	DOWN		NO
AT1G22330	-0.916605	3.4188	1.28039e-06	6.46163e-05	DOWN		NO
AT1G22530	-1.16558	6.21937	9.98919e-09	8.64899e-07	DOWN		NO
AT1G22570	-1.0658	3.46645	0.000644399	0.013138	DOWN		NO
AT1G22650	-1.69055	3.4203	4.8101e-13	9.58634e-11	DOWN		NO
AT1G22740	-0.805027	3.31048	3.70446e-05	0.00120318	DOWN		NO
AT1G22882	-0.918442	4.7863	7.7063e-07	4.14626e-05	DOWN		NO
AT1G22890	-0.889517	4.24804	4.50964e-05	0.00142085	DOWN		NO
AT1G22910	-0.610622	4.49671	9.78862e-07	5.09568e-05	DOWN		NO
AT1G23030	-1.32849	5.50478	1.34823e-19	7.4442e-17	DOWN		NO
AT1G23090	-1.21033	4.05622	1.69728e-16	5.8934e-14	DOWN		NO
AT1G23130	0.805809	9.0488	4.65825e-15	1.28602e-12	UP		YES	1:8200637:TGGTAAACACAAACGTTTATTTATAATATAATTTTGCAACAACATACAAGATTTGATAGGTTAACCCTTCGTTTTGGGTGCA-T;intronic_variant&splice_acceptor_region_variant&splice_donor_region_variant&splice_acceptor_variant&splice_donor_variant&protein_coding,1:8200637:TGGTAAACACAAACGTTTATTTATAATATAATTTTGCAACAACATACAAGATTTGATAGGTTAACCCTTCGTTTTGGGTGCA-T;intronic_variant
AT1G23160	2.05992	-1.30957	2.43087e-05	0.000838874	UP		NO
AT1G23480	-1.15577	4.2629	1.42871e-12	2.64398e-10	DOWN		NO
AT1G23820	-0.442864	6.23436	1.77392e-05	0.000640379	DOWN		NO
AT1G23870	-0.97535	6.5578	3.7439e-22	3.07557e-19	DOWN		YES	1:8432936:G-A;protein_coding;stop-gain;TGG>TAG;W>*
AT1G23935	-1.43204	0.233858	0.00111978	0.0205086	DOWN		NO
AT1G23940	-0.839031	0.426162	0.00304969	0.0449919	DOWN		NO
AT1G24090	1.06045	0.784607	0.00277579	0.0418869	UP		NO
AT1G24148	0.533449	5.03152	0.000115646	0.00313613	UP		NO
AT1G24170	-1.21644	4.93644	6.17787e-16	1.94464e-13	DOWN		NO
AT1G24260	-1.008	0.868598	8.62541e-05	0.00246197	DOWN		NO
AT1G24400	-0.608058	3.4284	0.000399326	0.00884849	DOWN		NO
AT1G24530	-1.45314	4.22565	2.25102e-11	3.54282e-09	DOWN		NO
AT1G25230	-0.570076	6.24774	6.58073e-06	0.000271625	DOWN		NO
AT1G25400	-2.39728	2.49025	4.10097e-09	3.924e-07	DOWN		NO
AT1G25440	0.743468	7.55013	5.04177e-13	9.98894e-11	UP		NO
AT1G25520	-0.411804	4.66534	0.00156163	0.0267126	DOWN		NO
AT1G25530	-0.563377	4.1714	0.00250645	0.0386184	DOWN		NO
AT1G25550	-1.04541	7.18872	2.1121e-11	3.33979e-09	DOWN		NO
AT1G26220	0.417516	4.54449	0.00163069	0.0276414	UP		NO
AT1G26270	-0.362827	6.03153	0.00137055	0.0241557	DOWN		NO
AT1G26558	5.05559	-0.157346	6.50294e-18	3.00035e-15	UP		NO
AT1G26840	0.952497	1.07035	0.000256296	0.00608765	UP		NO
AT1G27030	0.489113	4.67297	0.00113231	0.0206818	UP		YES	1:9383584:GT-G;intronic_variant,1:9383536:T-TA;intronic_variant
AT1G27045	1.51428	-0.733574	0.00034437	0.00781585	UP		NO
AT1G27100	-0.639122	6.40667	1.01051e-05	0.000395755	DOWN		NO
AT1G27210	-0.377296	6.19078	0.000765931	0.0151138	DOWN		NO
AT1G27285	-1.03646	0.809206	5.70856e-05	0.00171823	DOWN		NO
AT1G27290	-0.588415	6.45371	1.58033e-05	0.000579184	DOWN		NO
AT1G27300	-0.451495	4.8431	0.00044226	0.00964752	DOWN		NO
AT1G27460	-0.49769	4.63585	0.00178331	0.029511	DOWN		NO
AT1G27480	0.442468	5.49475	0.000129435	0.0034517	UP		NO
AT1G27500	-0.527679	3.01665	0.00243261	0.0376356	DOWN		NO
AT1G27510	-0.455549	6.16008	1.20691e-05	0.000457768	DOWN		NO
AT1G27530	0.3275	5.73115	0.00226427	0.0355704	UP		NO
AT1G27670	-0.81342	2.41353	0.00156542	0.0267503	DOWN		NO
AT1G27770	-0.950517	5.53751	2.85735e-10	3.60444e-08	DOWN		NO
AT1G27980	-0.606329	5.32274	1.43645e-06	7.17822e-05	DOWN		YES	1:9748971:C-A;protein_coding;missense;CAC>AAC;H>N
AT1G28330	-1.17302	7.28658	2.48361e-20	1.52092e-17	DOWN		NO
AT1G28560	0.593525	2.28057	0.00234689	0.036614	UP		NO
AT1G28580	-0.320001	6.69281	0.00132543	0.0235452	DOWN		NO
AT1G28610	0.497879	4.26406	0.00223121	0.0352483	UP		NO
AT1G28670	-0.414066	5.44501	0.001731	0.0289051	DOWN		NO
AT1G29195	1.23915	1.13031	1.70134e-06	8.3289e-05	UP		NO
AT1G29240	-0.561237	3.54732	0.000585783	0.0121593	DOWN		NO
AT1G29270	-1.04016	1.75501	0.00240095	0.0372811	DOWN		NO
AT1G29340	-0.395442	5.88448	0.000322789	0.007416	DOWN		NO
AT1G29395	0.666173	5.27124	4.45768e-09	4.21739e-07	UP		NO
AT1G29600	0.836431	1.82036	0.00100797	0.0188608	UP		NO
AT1G29640	0.770246	1.97862	0.000340015	0.00775359	UP		NO
AT1G29690	-0.95843	4.58496	1.06014e-07	7.01505e-06	DOWN		NO
AT1G30135	-3.56285	-1.06562	0.000119654	0.00322406	DOWN		NO
AT1G30140	2.57795	-0.550366	0.00257852	0.0394222	UP		NO
AT1G30260	0.875973	3.24436	1.65615e-06	8.16377e-05	UP		NO
AT1G30320	-0.421577	4.26503	0.00137766	0.0242177	DOWN		NO
AT1G30360	-0.415311	7.82978	0.000164228	0.00420317	DOWN		NO
AT1G30440	-0.393836	5.3898	0.000495028	0.0105659	DOWN		NO
AT1G30530	0.889853	4.46603	2.10123e-09	2.15111e-07	UP		NO
AT1G30570	-0.395261	5.01217	0.00304054	0.0449357	DOWN		NO
AT1G30590	-0.544406	5.67522	7.55757e-06	0.000306683	DOWN		NO
AT1G30720	-0.954366	3.01003	0.000138082	0.00364191	DOWN		NO
AT1G30760	-0.723445	1.90138	0.00270548	0.041073	DOWN		NO
AT1G31310	-1.62366	1.73447	1.4741e-06	7.35543e-05	DOWN		NO
AT1G31570	2.29544	-0.0575647	0.000218064	0.00531832	UP		NO
AT1G31580	0.754884	8.10186	0.000214903	0.00525265	UP		NO
AT1G31600	-0.373556	5.25757	0.00109135	0.0200972	DOWN		NO
AT1G31690	1.62238	0.705481	6.0281e-05	0.00179993	UP		NO
AT1G31920	0.555395	4.48742	0.000198111	0.00491716	UP		NO
AT1G32090	-0.604851	5.54944	4.13796e-08	3.04968e-06	DOWN		NO
AT1G32160	0.37706	6.60108	9.52717e-05	0.00266737	UP		NO
AT1G32240	0.569295	3.10329	0.00309242	0.0455028	UP		NO
AT1G32350	-1.6204	2.42529	0.000597879	0.0123693	DOWN		NO
AT1G32460	-0.51299	4.51167	0.000801921	0.0157215	DOWN		NO
AT1G32520	0.487053	4.97766	7.23222e-05	0.00212555	UP		NO
AT1G32640	-1.17998	5.81143	1.11094e-07	7.27966e-06	DOWN		NO
AT1G32700	-0.373426	6.62185	0.00113747	0.0207436	DOWN		NO
AT1G32920	-1.86086	5.15814	2.79596e-14	6.72648e-12	DOWN		NO
AT1G33050	-0.318264	6.50678	0.00285408	0.0427997	DOWN		NO
AT1G33260	0.873931	2.60315	0.000368142	0.0082773	UP		NO
AT1G33475	-0.72551	1.77498	0.00134587	0.0238079	DOWN		NO
AT1G33590	-0.375438	6.50965	0.00143147	0.0249422	DOWN		NO
AT1G33610	-0.78807	3.06894	0.000433949	0.00948465	DOWN		NO
AT1G33720	1.7896	1.33281	0.000109828	0.00299768	UP		NO
AT1G33760	-4.68032	-1.97279	8.82452e-05	0.00251241	DOWN		NO
AT1G33790	-0.67139	4.59933	0.00108749	0.020059	DOWN		NO
AT1G33811	-0.767144	5.7315	1.38777e-07	8.88621e-06	DOWN		YES	1:12268698:A-AT;intronic_variant
AT1G34140	-2.78008	-1.76561	1.14385e-05	0.000437796	DOWN		NO
AT1G34180	-0.996852	1.45731	8.99137e-05	0.00254914	DOWN		NO
AT1G34210	-0.445381	5.0946	0.00149195	0.0256904	DOWN		NO
AT1G34370	-0.433974	6.41358	1.01234e-05	0.000396011	DOWN		NO
AT1G34570	0.398193	4.39244	0.00333423	0.0481975	UP		NO
AT1G34630	-0.507248	4.53585	8.08011e-05	0.00233002	DOWN		NO
AT1G35140	-3.37752	4.60861	4.20764e-23	3.9366e-20	DOWN		NO
AT1G35290	1.03962	0.678583	0.000236882	0.00570294	UP		NO
AT1G35560	0.509882	4.02858	0.000607905	0.0125315	UP		NO
AT1G35580	-0.387818	6.68731	0.000306409	0.00709777	DOWN		NO
AT1G35612	-0.723603	4.79173	1.11339e-07	7.28154e-06	DOWN		NO
AT1G35710	1.69021	4.51022	3.0508e-10	3.8341e-08	UP		NO
AT1G35720	0.433454	8.04972	0.00327105	0.0474732	UP		NO
AT1G35995	1.75025	-1.78302	0.000486744	0.0104421	UP		NO
AT1G36060	-1.06715	5.02834	1.22392e-09	1.34196e-07	DOWN		NO
AT1G36330	-4.56745	-2.46828	2.87914e-07	1.70128e-05	DOWN		NO
AT1G36370	-0.767232	6.02606	1.13252e-06	5.7707e-05	DOWN		NO
AT1G36630	5.17426	-2.81187	0.000834377	0.0161975	UP		YES	1:13841967:C-T;exonic_variant,1:13841560:T-C;exonic_variant,1:13841603:G-C;exonic_variant,1:13841632:C-T;exonic_variant,1:13841558:A-G;exonic_variant,1:13841803:A-G;exonic_variant,1:13841593:C-T;exonic_variant,1:13841464:A-G;exonic_variant,1:13841484:T-TAATTCG;exonic_variant,1:13841286:C-T;exonic_variant,1:13841260:G-GAT;exonic_variant,1:13841002:A-G;exonic_variant,1:13841318:T-C;exonic_variant,1…
AT1G42560	-1.49514	0.395795	2.18538e-06	0.00010367	DOWN		YES	1:15982936:A-AAT;intronic_variant
AT1G43590	1.53251	1.39413	1.76341e-08	1.43809e-06	UP		YES	1:16414549:T-G;exonic_variant,1:16414570:C-A;exonic_variant,1:16414516:T-C;exonic_variant,1:16414573:A-G;exonic_variant,1:16414523:A-G;exonic_variant,1:16414528:G-A;exonic_variant,1:16414553:C-A;exonic_variant,1:16414568:C-A;exonic_variant,1:16414571:T-C;exonic_variant,1:16414501:C-T;exonic_variant
AT1G43650	0.640092	2.26047	0.00304734	0.044984	UP		NO
AT1G43800	0.939456	4.54138	1.56634e-05	0.000575477	UP		NO
AT1G44350	-1.30689	4.26569	2.31137e-05	0.000804226	DOWN		NO
AT1G44510	4.01335	-2.74969	3.50168e-05	0.00114728	UP		NO
AT1G45201	0.53774	6.43986	7.19877e-05	0.00211757	UP		NO
AT1G45616	0.837551	1.31664	0.0013269	0.0235589	UP		NO
AT1G45688	-0.315537	6.1797	0.00167845	0.0282095	DOWN		NO
AT1G45976	-0.38858	4.93104	0.000588029	0.0121879	DOWN		NO
AT1G47265	3.37601	-2.9722	0.00303257	0.0448376	UP		NO
AT1G47380	-0.485189	4.54818	0.000253436	0.00602823	DOWN		NO
AT1G47395	-1.6833	4.50082	0.000343451	0.00781079	DOWN		NO
AT1G47510	0.743882	2.62109	0.00148285	0.0255989	UP		NO
AT1G47655	-0.880782	1.2985	0.00195955	0.0319084	DOWN		NO
AT1G47990	-1.61045	-0.577892	0.000373668	0.00837916	DOWN		NO
AT1G48100	1.14438	4.30064	3.13533e-05	0.00104063	UP		NO
AT1G48110	0.457379	5.58324	2.68509e-05	0.000909825	UP		NO
AT1G48330	0.756249	1.96002	0.000648205	0.0131678	UP		NO
AT1G48470	1.62248	-1.36122	0.00294413	0.0437798	UP		NO
AT1G48745	1.01028	2.12733	8.90197e-07	4.72169e-05	UP		NO
AT1G49130	-0.522485	4.12564	0.00334156	0.0482828	DOWN		NO
AT1G49320	-0.799863	3.4636	0.000985627	0.0185044	DOWN		NO
AT1G49450	-0.864865	2.26272	0.00108165	0.0199842	DOWN		NO
AT1G49510	-0.381841	5.10637	0.000979681	0.0184236	DOWN		NO
AT1G49570	-1.26436	4.2942	0.00257748	0.0394222	DOWN		NO
AT1G49650	-0.596423	3.87211	8.8765e-05	0.00252295	DOWN		NO
AT1G49750	0.424749	6.20031	0.000174397	0.00441644	UP		NO
AT1G49780	-0.683539	4.05751	1.3285e-05	0.000496616	DOWN		NO
AT1G49840	-0.58245	3.92372	9.78707e-05	0.00272203	DOWN		NO
AT1G49890	-0.442519	4.87628	0.000177489	0.00448126	DOWN		NO
AT1G49900	-1.32184	0.735689	6.16423e-06	0.000258231	DOWN		YES	1:18475755:GATAT-G;intronic_variant
AT1G50040	-4.25802	2.40613	1.63347e-18	8.09071e-16	DOWN		NO
AT1G50290	0.636219	3.93775	9.99108e-06	0.000391746	UP		NO
AT1G50732	0.441754	4.06451	0.00298938	0.044305	UP		NO
AT1G50960	2.94731	-2.55813	0.00229974	0.0360268	UP		NO
AT1G51080	0.710761	2.42204	0.000714372	0.0143486	UP		NO
AT1G51090	1.78044	-1.01254	0.000426978	0.00935656	UP		NO
AT1G51940	-0.745134	5.08228	6.38654e-06	0.000265745	DOWN		NO
AT1G51950	-0.453027	5.69045	6.08935e-05	0.0018134	DOWN		NO
AT1G52000	0.87836	5.46362	9.47401e-05	0.00265912	UP		NO
AT1G52030	1.4761	1.41936	4.27779e-05	0.00136053	UP		NO
AT1G52040	1.99353	1.88731	0.00020068	0.00497358	UP		NO
AT1G52220	0.315734	8.07421	0.00223966	0.035332	UP		NO
AT1G52565	0.608561	3.53716	0.000312347	0.00720353	UP		NO
AT1G52720	-0.489802	4.0508	0.00117758	0.0213582	DOWN		NO
AT1G52740	-0.360416	6.82194	0.00103033	0.0191938	DOWN		NO
AT1G52750	-0.635779	2.86649	0.00304781	0.044984	DOWN		NO
AT1G52855	1.16197	1.33082	7.0791e-06	0.00028971	UP		NO
AT1G52880	0.557212	3.73185	0.00123869	0.0223104	UP		NO
AT1G52890	-1.02274	5.29992	4.91441e-09	4.61065e-07	DOWN		NO
AT1G53430	-0.911858	5.74366	2.16484e-09	2.20951e-07	DOWN		NO
AT1G53560	0.346359	4.82159	0.0032645	0.0474732	UP		NO
AT1G53785	-0.760572	1.80242	0.00186739	0.0306508	DOWN		NO
AT1G53885	-2.43307	3.87285	2.06208e-09	2.13046e-07	DOWN		NO
AT1G54040	2.41433	1.66198	2.93405e-11	4.47158e-09	UP		NO
AT1G54090	-0.504492	4.97651	7.3194e-05	0.00214369	DOWN		NO
AT1G54100	-0.415183	8.39702	0.000118166	0.00319762	DOWN		NO
AT1G54560	2.23646	-2.14324	0.00153941	0.0263996	UP		NO
AT1G55020	0.955083	5.6754	4.10642e-08	3.03946e-06	UP		NO
AT1G55265	0.816264	2.92677	0.000626971	0.0128527	UP		NO
AT1G55330	-0.851561	5.19244	2.64234e-13	5.411e-11	DOWN		NO
AT1G55380	1.55615	-1.10063	0.00162882	0.0276235	UP		NO
AT1G55450	-0.864384	5.30895	0.000890287	0.0170859	DOWN		NO
AT1G55510	-0.527075	4.36047	5.6131e-05	0.00169404	DOWN		NO
AT1G55760	0.610021	3.44289	0.000293888	0.00685963	UP		NO
AT1G55910	0.559237	4.07976	0.000938035	0.0178195	UP		NO
AT1G55920	0.51389	6.38514	9.52672e-05	0.00266737	UP		NO
AT1G55940	0.768745	1.28627	0.00112339	0.0205413	UP		NO
AT1G55960	0.463742	7.07263	0.000102243	0.00282267	UP		NO
AT1G56140	-0.546361	4.63541	3.60745e-05	0.00117621	DOWN		NO
AT1G56190	0.306262	7.23193	0.00224872	0.0354345	UP		NO
AT1G56300	-0.578206	4.59294	0.00130436	0.0232322	DOWN		NO
AT1G56460	-2.05998	5.06151	5.75762e-59	6.46408e-55	DOWN		YES	1:21147570:C-T;protein_coding;stop-gain;CGA>TGA;R>*
AT1G56600	1.22371	4.6342	3.63943e-08	2.73615e-06	UP		NO
AT1G57680	-0.859788	6.29541	3.19728e-10	3.97371e-08	DOWN		NO
AT1G57980	-0.815516	2.76116	0.000248547	0.00593134	DOWN		NO
AT1G57990	-2.4135	5.48503	4.9436e-16	1.58576e-13	DOWN		NO
AT1G58100	-0.34762	4.93923	0.00335039	0.048389	DOWN		NO
AT1G58150	-0.98541	0.584264	0.00132238	0.0235036	DOWN		NO
AT1G58520	0.968318	5.51929	4.77798e-11	6.93652e-09	UP		NO
AT1G59700	0.399222	5.3622	0.000466598	0.0100934	UP		NO
AT1G59710	-0.573113	3.48474	0.00221732	0.0350783	DOWN		NO
AT1G59910	-0.529037	4.86671	0.000409159	0.00903071	DOWN		NO
AT1G59920	2.87907	-0.80114	0.00162	0.0275144	UP		NO
AT1G59930	2.69908	0.882567	6.01622e-05	0.00179925	UP		NO
AT1G60110	2.26761	1.54773	3.95156e-09	3.79181e-07	UP		YES	1:22170154:G-T;exonic_variant
AT1G60470	1.95843	-0.264017	5.51768e-05	0.00166973	UP		NO
AT1G60740	-0.950693	0.494094	0.0016804	0.0282282	DOWN		NO
AT1G60787	1.7978	-0.898966	0.00209237	0.0336266	UP		NO
AT1G60860	-0.451533	4.53476	0.00137628	0.024206	DOWN		NO
AT1G61100	-1.13261	6.70589	5.98041e-15	1.6244e-12	DOWN		NO
AT1G61690	-0.323006	5.35336	0.00203734	0.0329269	DOWN		NO
AT1G61750	-2.06233	-0.72983	5.9036e-07	3.27577e-05	DOWN		NO
AT1G61810	0.916402	2.53771	5.89495e-06	0.000249432	UP		YES	1:22831253:C-CT;intronic_variant
AT1G61890	-0.461793	5.79475	0.00210342	0.0336878	DOWN		NO
AT1G61900	-0.518564	5.2238	4.07633e-05	0.00130508	DOWN		NO
AT1G62030	0.447458	3.70013	0.00289085	0.0431973	UP		NO
AT1G62250	0.526794	5.39809	8.43824e-06	0.000337139	UP		NO
AT1G62420	-0.887314	2.37628	0.00145934	0.025258	DOWN		NO
AT1G62520	-0.899226	2.37115	2.76444e-05	0.000930971	DOWN		NO
AT1G62540	0.664737	4.42335	0.000493584	0.0105418	UP		NO
AT1G62560	1.15073	3.92783	2.31202e-07	1.40056e-05	UP		YES	1:23161199:C-T;intronic_variant,1:23161199:C-T;protein_coding;missense;ACA>ATA;T>I,1:23161199:C-T;exonic_variant
AT1G62580	1.63946	-0.808316	4.43943e-05	0.00140267	UP		NO
AT1G62620	1.01921	1.57962	2.16799e-05	0.00076541	UP		NO
AT1G62770	-0.733115	4.3681	0.000103956	0.00286292	DOWN		NO
AT1G62975	0.48736	3.77454	0.00172675	0.0288486	UP		NO
AT1G63180	-0.95335	3.60147	8.76839e-09	7.69083e-07	DOWN		NO
AT1G63440	0.733123	3.52569	0.000142436	0.00373628	UP		NO
AT1G63750	-0.96377	3.46641	1.70122e-05	0.000617445	DOWN		NO
AT1G63820	-1.14624	0.115433	0.00326466	0.0474732	DOWN		NO
AT1G63830	-0.566249	4.52353	7.39851e-06	0.000301312	DOWN		NO
AT1G63860	-0.9625	3.32381	5.44236e-05	0.00165288	DOWN		NO
AT1G63880	-0.476695	6.32817	5.58283e-05	0.00168724	DOWN		NO
AT1G63960	2.40811	-2.41413	0.00166356	0.0280555	UP		NO
AT1G64360	2.18895	2.41	1.23158e-15	3.73702e-13	UP		NO
AT1G64390	0.721341	6.06378	2.48664e-05	0.000856367	UP		NO
AT1G64400	0.762993	3.67446	0.000153224	0.00396979	UP		NO
AT1G64500	0.887083	6.43102	5.68566e-08	4.05718e-06	UP		NO
AT1G64610	-0.49046	3.47154	0.0026428	0.040277	DOWN		NO
AT1G64680	0.365782	7.11737	0.00163587	0.0277012	UP		NO
AT1G64780	1.0163	5.27724	2.27187e-13	4.72339e-11	UP		NO
AT1G64900	0.724796	6.05932	1.04975e-08	9.01954e-07	UP		NO
AT1G64950	0.422092	6.35373	5.35801e-05	0.00163167	UP		NO
AT1G65190	0.49844	4.67019	0.00326643	0.0474732	UP		NO
AT1G65490	0.873051	4.47378	8.88277e-08	6.01973e-06	UP		NO
AT1G65500	1.73452	1.14367	9.25232e-07	4.86158e-05	UP		NO
AT1G65800	0.743154	5.44646	1.07997e-05	0.000415708	UP		NO
AT1G65860	1.06557	3.75902	2.35284e-07	1.41764e-05	UP		NO
AT1G65870	1.05694	1.00792	2.76404e-05	0.000930971	UP		NO
AT1G65970	-0.498851	5.74803	0.000346748	0.00786453	DOWN		NO
AT1G66060	-2.45902	-2.28413	0.00141116	0.0246777	DOWN		NO
AT1G66150	-0.477318	7.10749	5.55327e-06	0.000237662	DOWN		NO
AT1G66160	-1.82494	3.22023	3.35936e-10	4.14457e-08	DOWN		NO
AT1G66180	-0.878321	7.45124	1.09704e-14	2.75742e-12	DOWN		NO
AT1G66460	1.18856	-0.350419	0.00281855	0.0423423	UP		NO
AT1G66540	0.773715	3.40723	1.83152e-05	0.000659055	UP		NO
AT1G66725	0.884272	2.37915	0.000118562	0.00320232	UP		NO
AT1G66783	-0.586344	3.7831	0.000103355	0.00284869	DOWN		NO
AT1G66800	2.03738	0.55814	5.05268e-06	0.000219586	UP		NO
AT1G66840	0.41525	4.62784	0.00171695	0.0287418	UP		NO
AT1G67070	-0.878308	2.78975	1.30264e-05	0.000488034	DOWN		NO
AT1G67090	0.34925	12.9674	0.00305436	0.0450411	UP		NO
AT1G67105	1.69392	7.26118	8.27674e-25	8.99255e-22	UP		YES	1:25058254:G-GA;exonic_variant
AT1G67230	-0.554785	6.81639	2.66117e-08	2.09418e-06	DOWN		NO
AT1G67360	0.425304	4.95483	0.000902793	0.0172767	UP		NO
AT1G67860	0.585033	5.25094	2.12376e-05	0.000753313	UP		NO
AT1G67865	1.58639	5.87795	1.81562e-21	1.32939e-18	UP		NO
AT1G67910	-0.833738	3.87755	8.09282e-08	5.54013e-06	DOWN		NO
AT1G68020	-0.338156	6.03716	0.00221559	0.0350673	DOWN		NO
AT1G68050	-0.877711	0.878793	0.00216543	0.0344515	DOWN		NO
AT1G68110	0.629858	2.53118	0.00225604	0.0354742	UP		NO
AT1G68170	-1.68218	-0.427178	8.75469e-06	0.000348955	DOWN		NO
AT1G68190	-0.342828	6.10344	0.00298215	0.044228	DOWN		NO
AT1G68400	-0.575677	4.07819	0.00040625	0.00898419	DOWN		NO
AT1G68410	-0.517638	4.60264	3.33169e-05	0.0010991	DOWN		NO
AT1G68520	-0.603387	7.86449	5.14024e-06	0.000222617	DOWN		NO
AT1G68530	0.392928	8.25281	0.000239073	0.00574337	UP		NO
AT1G68580	-0.852476	5.81024	9.63142e-12	1.62198e-09	DOWN		NO
AT1G68670	-0.825488	6.58426	2.34069e-08	1.86376e-06	DOWN		NO
AT1G68710	0.357433	4.75066	0.00271848	0.0412251	UP		NO
AT1G68870	1.41842	0.46877	4.34775e-06	0.000192174	UP		NO
AT1G69160	0.710428	5.66137	7.32485e-09	6.56139e-07	UP		NO
AT1G69230	0.976068	0.81616	0.00109338	0.0201125	UP		NO
AT1G69360	-0.450976	5.04511	0.000203462	0.00502404	DOWN		NO
AT1G69370	-0.577858	3.56465	0.00138707	0.024331	DOWN		NO
AT1G69440	0.649936	3.19267	0.00024209	0.00579931	UP		NO
AT1G69530	1.16654	7.17496	1.66175e-17	7.17555e-15	UP		NO
AT1G69610	0.69482	3.66397	1.57068e-05	0.000576276	UP		NO
AT1G69730	1.13158	3.8146	1.51694e-07	9.58575e-06	UP		NO
AT1G69740	-0.322703	7.40474	0.00280664	0.042257	DOWN		NO
AT1G69760	-1.00107	4.96023	3.33611e-06	0.000152461	DOWN		NO
AT1G69840	-0.700273	5.02629	2.1743e-06	0.00010329	DOWN		NO
AT1G69850	-0.438407	6.45791	5.29128e-05	0.0016172	DOWN		NO
AT1G69890	-1.4157	3.45521	3.42106e-07	1.99006e-05	DOWN		NO
AT1G69900	-0.736703	2.04522	0.00200414	0.0324995	DOWN		NO
AT1G69910	-0.524127	3.42857	0.00137616	0.024206	DOWN		NO
AT1G70090	-1.89691	5.47229	2.41659e-26	2.89324e-23	DOWN		NO
AT1G70100	-0.384255	5.59569	0.000320539	0.00736933	DOWN		NO
AT1G70280	-0.527562	5.35231	0.000111555	0.00303742	DOWN		NO
AT1G70290	-1.13592	8.13213	5.58763e-18	2.61384e-15	DOWN		NO
AT1G70420	1.15222	3.53671	1.58192e-12	2.91151e-10	UP		NO
AT1G70520	-0.695538	5.44228	3.17417e-06	0.000146051	DOWN		NO
AT1G70530	-0.536313	6.15849	1.22815e-06	6.22973e-05	DOWN		NO
AT1G70690	-0.654802	2.95613	0.00269418	0.0409674	DOWN		NO
AT1G70700	-1.65096	6.38166	1.88969e-07	1.16783e-05	DOWN		YES	1:26656454:G-A;protein_coding;missense;GCT>ACT;A>T
AT1G70740	-0.517384	3.63054	0.00185448	0.0304539	DOWN		NO
AT1G70850	0.805652	8.35914	3.00495e-08	2.30546e-06	UP		NO
AT1G70890	0.404025	6.41569	0.000100387	0.00278282	UP		NO
AT1G70900	0.432692	5.19489	0.000476298	0.0102506	UP		NO
AT1G71030	0.663845	7.1549	1.05572e-06	5.42868e-05	UP		NO
AT1G71040	-0.394157	6.0622	0.001466	0.0253602	DOWN		NO
AT1G71070	-0.442496	4.70766	0.00202433	0.0327953	DOWN		NO
AT1G71200	1.34432	1.1891	3.34099e-05	0.00109998	UP		NO
AT1G71480	0.37679	5.7718	0.000720546	0.0144113	UP		NO
AT1G71696	-0.556639	3.96175	0.000291171	0.00680091	DOWN		NO
AT1G71697	-0.405807	4.42572	0.00173389	0.0289248	DOWN		NO
AT1G71880	-0.532566	5.17902	6.49908e-06	0.000268584	DOWN		NO
AT1G71930	-1.42656	-0.46918	0.000190965	0.00476651	DOWN		NO
AT1G72030	0.611316	5.36848	1.33307e-07	8.55655e-06	UP		NO
AT1G72060	-1.34427	3.29348	1.009e-06	5.21228e-05	DOWN		NO
AT1G72070	-1.11135	3.59869	1.66032e-10	2.15912e-08	DOWN		NO
AT1G72090	-0.353234	4.95325	0.00281111	0.0422683	DOWN		YES	1:27124798:G-A;intronic_variant
AT1G72130	0.434122	5.43294	8.25814e-05	0.00237729	UP		NO
AT1G72150	-0.682683	9.17418	8.18836e-07	4.37765e-05	DOWN		NO
AT1G72330	-0.535788	3.49131	0.000689053	0.0139137	DOWN		NO
AT1G72340	-0.402712	4.56643	0.00275162	0.0416528	DOWN		NO
AT1G72416	-1.40316	2.51041	1.95974e-06	9.38919e-05	DOWN		NO
AT1G72430	-1.40314	5.65654	4.17638e-09	3.98483e-07	DOWN		NO
AT1G72450	-1.46123	6.39942	4.44449e-06	0.000195459	DOWN		NO
AT1G72470	0.555634	3.31026	0.00277137	0.0418389	UP		NO
AT1G72520	-1.73222	2.42922	0.00170938	0.0286436	DOWN		NO
AT1G72610	-0.846096	7.68266	3.38334e-08	2.55503e-06	DOWN		NO
AT1G72630	-0.494064	4.52827	0.000410571	0.00905003	DOWN		NO
AT1G72750	-0.345322	5.85484	0.00164227	0.0277894	DOWN		NO
AT1G72900	-1.0245	4.42177	1.47851e-05	0.000547229	DOWN		NO
AT1G73040	0.918149	1.47691	0.00213364	0.0340791	UP		NO
AT1G73330	1.36037	7.5496	2.36445e-17	9.71183e-15	UP		NO
AT1G73540	-0.655154	4.31647	0.00191891	0.031359	DOWN		NO
AT1G73550	-2.36036	0.181856	5.87672e-09	5.42285e-07	DOWN		NO
AT1G73660	-0.390968	6.60424	5.30855e-05	0.00162101	DOWN		NO
AT1G73830	-0.564511	5.98705	0.00021938	0.00533883	DOWN		NO
AT1G73870	0.502303	6.41878	0.000305505	0.00708171	UP		NO
AT1G74200	0.896789	0.742672	0.00207038	0.0333648	UP		NO
AT1G74450	-0.53048	3.44803	0.00133333	0.0236482	DOWN		NO
AT1G74670	-0.422927	8.47454	0.000385776	0.00860485	DOWN		NO
AT1G74910	-0.447971	7.4246	1.02132e-05	0.000397676	DOWN		NO
AT1G74930	-3.06715	2.02609	4.39955e-13	8.82032e-11	DOWN		NO
AT1G74950	-1.38259	4.88035	7.14007e-08	4.98931e-06	DOWN		NO
AT1G75020	-0.614611	3.59633	0.000106886	0.00292923	DOWN		NO
AT1G75220	-0.524567	6.33316	8.78652e-05	0.00250371	DOWN		NO
AT1G75230	-0.802185	3.91403	6.09917e-05	0.00181472	DOWN		NO
AT1G75240	-0.820268	5.01781	9.06105e-08	6.12303e-06	DOWN		NO
AT1G75460	0.540897	7.36143	1.16611e-05	0.000445302	UP		NO
AT1G75580	1.21943	2.60124	2.0353e-06	9.70977e-05	UP		NO
AT1G75730	-0.398829	4.39848	0.00208721	0.033604	DOWN		NO
AT1G75800	-0.531156	6.87561	3.89235e-07	2.23336e-05	DOWN		NO
AT1G75880	-0.702552	2.32853	0.000878143	0.0168817	DOWN		NO
AT1G76020	0.626882	4.147	6.12356e-06	0.000257019	UP		NO
AT1G76090	-1.09061	5.32182	9.53919e-11	1.31139e-08	DOWN		NO
AT1G76100	-0.326538	7.40928	0.00197545	0.0320961	DOWN		NO
AT1G76130	0.723851	4.44033	1.93883e-06	9.30224e-05	UP		NO
AT1G76160	-0.545869	6.21169	7.63957e-05	0.00221818	DOWN		NO
AT1G76410	-1.51787	2.71005	9.61813e-16	2.972e-13	DOWN		NO
AT1G76590	-0.934436	4.04012	4.20135e-08	3.08964e-06	DOWN		NO
AT1G76600	-1.36841	2.69002	7.66641e-06	0.000310725	DOWN		NO
AT1G76620	0.956846	1.65307	0.000375524	0.00841518	UP		NO
AT1G76650	-1.90716	1.07353	5.76678e-06	0.000244932	DOWN		NO
AT1G76700	-0.452636	4.22621	0.000635394	0.0130016	DOWN		NO
AT1G76890	-0.458093	5.4517	5.11277e-05	0.00156691	DOWN		NO
AT1G76930	-0.588122	7.513	3.90232e-05	0.00126136	DOWN		NO
AT1G76960	1.04704	3.8881	0.00113754	0.0207436	UP		NO
AT1G77120	0.825379	5.14217	0.00326968	0.0474732	UP		NO
AT1G77210	-0.820272	4.82706	7.37711e-07	3.99849e-05	DOWN		NO
AT1G77280	0.65114	3.97561	2.8239e-05	0.000945446	UP		NO
AT1G77380	-0.539516	3.68632	0.00235664	0.0367249	DOWN		NO
AT1G77480	-0.736631	4.68157	5.64992e-06	0.000241185	DOWN		YES	1:29115222:G-A;splice_acceptor_region_variant
AT1G77640	-1.82777	-0.29084	4.1343e-06	0.000184378	DOWN		NO
AT1G77680	0.487531	4.86329	4.91101e-05	0.00152002	UP		NO
AT1G77920	0.5622	4.59601	0.000101311	0.00280152	UP		YES	1:29300903:T-TTA;exonic_variant,1:29300884:TA-T;exonic_variant,1:29300847:C-A;exonic_variant,1:29300853:A-G;exonic_variant,1:29300922:T-C;exonic_variant,1:29300905:ATG-A;exonic_variant,1:29300940:A-AG;exonic_variant,1:29300896:A-C;exonic_variant,1:29300880:T-A;exonic_variant,1:29300932:C-T;exonic_variant
AT1G77960	1.07386	1.58759	0.00015534	0.00401226	UP		NO
AT1G78010	-0.490446	4.45919	0.000539119	0.0113134	DOWN		YES	1:29333958:G-A;protein_coding;missense;GTG>ATG;V>M
AT1G78040	-0.289279	8.36841	0.00209642	0.0336557	DOWN		YES	1:29345232:A-AACCTCGAGGTATATTTTCTTTTCTTACCTTTTTCTTAAATCATAAAACATACCACTAGGTTTATAATTTAAGAAAAAGGTAAGAAAAGAAAATAT;intronic_variant,1:29345232:A-AACCTCGAGGTATATTTTCTTTTCTTACCTTTTTCTTAAATCATAAAACATACCACTAGGTTTATAATTTAAGAAAAAGGTAAGAAAAGAAAATAT;intronic_variant&splice_donor_region_variant&exonic_variant&splice_donor_variant
AT1G78070	0.546568	5.90747	0.000160364	0.00411992	UP		NO
AT1G78170	0.583991	3.97842	0.00319765	0.0467448	UP		NO
AT1G78240	-0.357359	6.21388	0.000507272	0.0107591	DOWN		NO
AT1G78340	-0.602382	2.86336	0.00246097	0.038022	DOWN		NO
AT1G78700	-0.43064	4.57915	0.000418827	0.00921994	DOWN		NO
AT1G78720	-2.33308	-0.621298	1.65791e-06	8.16377e-05	DOWN		NO
AT1G78830	-0.573705	7.16315	0.00159664	0.0272285	DOWN		NO
AT1G78850	0.834873	8.47358	9.40522e-11	1.29827e-08	UP		NO
AT1G78880	-0.326942	5.55825	0.00289074	0.0431973	DOWN		NO
AT1G78995	0.820377	4.04539	2.99771e-08	2.30516e-06	UP		YES	1:29715578:G-A;splice_donor_region_variant&protein_coding;sense;TAC>TAT;Y>Y,1:29715578:G-A;splice_donor_region_variant,1:29715578:G-A;protein_coding;sense;TAC>TAT;Y>Y
AT1G79080	-0.558088	3.41832	0.000858244	0.0165939	DOWN		NO
AT1G79160	0.42272	4.96143	0.00100512	0.018818	UP		NO
AT1G79360	-1.5973	2.38112	2.74855e-09	2.73317e-07	DOWN		NO
AT1G79440	-0.498487	4.77839	0.000814929	0.0159025	DOWN		NO
AT1G79610	0.370438	4.89384	0.00203496	0.03292	UP		NO
AT1G79620	-0.690202	3.28031	0.00019236	0.00479207	DOWN		NO
AT1G79700	-0.775555	5.441	6.9327e-06	0.000284756	DOWN		NO
AT1G79720	-0.742321	4.17432	1.16181e-05	0.000444166	DOWN		NO
AT1G79770	0.90301	2.07087	0.00149976	0.0258117	UP		NO
AT1G80130	0.532976	6.78289	9.2901e-06	0.000367685	UP		NO
AT1G80160	-1.24838	2.58055	6.0867e-05	0.0018134	DOWN		NO
AT1G80340	1.30105	-0.410875	0.000445632	0.00970221	UP		NO
AT1G80420	-0.400779	5.18097	0.00135544	0.0239395	DOWN		NO
AT1G80440	-0.623387	8.09346	0.000561687	0.011714	DOWN		NO
AT1G80450	-0.846659	1.92544	0.000134533	0.00356787	DOWN		NO
AT1G80490	-0.366447	6.1754	0.000835279	0.0162057	DOWN		NO
AT1G80610	-0.528029	3.58462	0.0019265	0.0314524	DOWN		NO
AT1G80630	-0.464357	4.00627	0.000749984	0.014894	DOWN		NO
AT1G80650	-0.44949	4.37147	0.000378163	0.0084687	DOWN		NO
AT1G80830	-0.423489	6.12278	0.000358653	0.00809095	DOWN		NO
AT1G80840	-1.66619	4.04209	1.88631e-06	9.08911e-05	DOWN		NO
AT1G80930	-0.413905	6.467	7.28818e-05	0.00213827	DOWN	YES	NO
AT2G01008	0.873692	2.23946	0.00148032	0.0255729	UP		YES	2:2624:C-G;exonic_variant,2:1762:T-C;intronic_variant,2:1906:T-TG;exonic_variant&protein_coding
AT2G01100	-0.41856	5.60708	0.000765301	0.0151138	DOWN		NO
AT2G01150	1.04581	1.87956	3.68713e-06	0.000167142	UP		NO
AT2G01180	-0.710629	3.84934	0.000601357	0.0124336	DOWN		YES	2:106728:G-A;exonic_variant
AT2G01190	-0.611685	5.40932	1.85369e-06	8.95756e-05	DOWN		NO
AT2G01200	-2.22395	-0.506514	2.38878e-05	0.00082689	DOWN		NO
AT2G01220	-0.402132	5.62748	0.00026224	0.00619825	DOWN		NO
AT2G01290	0.593382	4.82577	6.19011e-07	3.40113e-05	UP		NO
AT2G01422	-4.63515	4.75075	5.0375e-106	1.69668e-101	DOWN		NO
AT2G01450	-0.433452	7.32582	1.73063e-05	0.000626767	DOWN		NO
AT2G01490	-0.341562	6.36528	0.000704689	0.0141953	DOWN		NO
AT2G01520	1.64458	7.14771	6.05486e-20	3.5161e-17	UP		NO
AT2G01850	-0.718379	7.53303	2.74878e-08	2.15076e-06	DOWN		NO
AT2G01890	-0.354145	5.19628	0.0025178	0.03874	DOWN		NO
AT2G01910	-0.509791	5.43214	2.80418e-05	0.000939778	DOWN		YES	2:418063:C-T;exonic_variant,2:418063:C-T;protein_coding;missense;TCC>TTC;S>F
AT2G02010	2.43692	2.08619	3.78207e-09	3.63954e-07	UP		NO
AT2G02060	-0.822758	3.21779	1.33385e-05	0.000498063	DOWN		NO
AT2G02070	-0.432669	5.7411	7.30384e-05	0.002141	DOWN		NO
AT2G02100	-1.02867	6.31939	1.0431e-09	1.16333e-07	DOWN		NO
AT2G02130	0.949962	5.7734	1.19329e-13	2.59299e-11	UP		NO
AT2G02220	-0.417589	5.33054	0.000981338	0.0184342	DOWN		NO
AT2G02450	-0.641553	3.43314	4.74321e-05	0.00147649	DOWN		NO
AT2G02710	-0.630492	7.05456	1.0671e-07	7.04723e-06	DOWN		NO
AT2G02850	-0.85968	2.52968	0.000616769	0.0126899	DOWN		NO
AT2G02930	-1.63048	1.79644	1.07288e-05	0.000413452	DOWN		NO
AT2G02950	-0.937251	4.82634	4.18396e-11	6.17104e-09	DOWN		NO
AT2G03090	0.733424	3.87976	0.0016212	0.0275144	UP		NO
AT2G03240	-0.797885	5.22502	1.54133e-09	1.63765e-07	DOWN		NO
AT2G03310	0.438357	5.09606	0.00037983	0.00850037	UP		NO
AT2G03550	0.53844	5.01601	9.56483e-06	0.000377229	UP		NO
AT2G03640	-0.423067	6.07132	4.98109e-05	0.00153634	DOWN		NO
AT2G03710	0.483997	3.5646	0.00346433	0.0497154	UP		NO
AT2G03750	0.444894	5.04267	0.00062933	0.0128932	UP		NO
AT2G04039	0.399778	6.60555	0.000248658	0.00593134	UP		NO
AT2G04080	0.768368	3.48199	0.000114469	0.0031067	UP		NO
AT2G04160	-0.357991	5.61362	0.00348246	0.049933	DOWN		YES	2:1401837:G-A;protein_coding;sense;TTC>TTT;F>F
AT2G04580	1.9804	-1.09165	0.00193875	0.0316066	UP		NO
AT2G04790	0.432523	4.67732	0.000649297	0.013182	UP		NO
AT2G05250	-0.526144	4.63496	0.000613451	0.0126294	DOWN		NO
AT2G05440	-0.678923	6.97208	2.82247e-08	2.19041e-06	DOWN		NO
AT2G05510	-1.55687	8.09424	4.39459e-27	5.48201e-24	DOWN		NO
AT2G05518	0.598562	2.66028	0.00172527	0.0288382	UP		NO
AT2G05914	1.94538	-1.22127	7.07818e-05	0.00208392	UP		NO
AT2G05950	0.979955	1.12366	0.000553216	0.0115517	UP		YES	2:2296621:A-G;intronic_variant,2:2296614:A-T;intronic_variant,2:2296621:A-G;exonic_variant,2:2296614:A-T;exonic_variant
AT2G05995	-2.08862	-2.05363	0.000545547	0.0114128	DOWN		NO
AT2G06002	1.13825	1.51764	1.19169e-06	6.05388e-05	UP		NO
AT2G06050	-0.778502	4.79927	0.000738746	0.0147316	DOWN		NO
AT2G06150	5.75036	-2.6837	7.40458e-05	0.002163	UP		NO
AT2G06255	-0.655983	1.48358	0.00278511	0.0419898	DOWN		NO
AT2G06530	-0.352442	5.78	0.00182259	0.0300327	DOWN		NO
AT2G06670	5.60519	-2.8571	4.27282e-05	0.00136023	UP		NO
AT2G06850	-1.35019	7.49169	8.19502e-21	5.20786e-18	DOWN		NO
AT2G06890	3.15938	-2.18865	0.000469892	0.0101452	UP		NO
AT2G06925	-0.462737	4.39269	0.00064062	0.0130847	DOWN		NO
AT2G07360	-0.326638	6.56844	0.000691089	0.0139464	DOWN		NO
AT2G07777	-0.939624	0.877469	0.00143365	0.0249673	DOWN		NO
AT2G07792	0.511653	4.32858	0.00118807	0.0215368	UP		YES	2:3337485:T-C;exonic_variant,2:3338190:C-T;exonic_variant,2:3335669:C-G;exonic_variant
AT2G10280	5.17196	-3.04541	0.00127921	0.0228742	UP		YES	2:3951835:T-A;exonic_variant,2:3952097:G-A;exonic_variant,2:3951927:C-T;exonic_variant,2:3951184:A-G;exonic_variant,2:3952106:A-C;exonic_variant,2:3951810:C-T;exonic_variant,2:3951826:C-A;exonic_variant,2:3951189:C-G;exonic_variant,2:3952065:C-T;exonic_variant,2:3951890:C-G;exonic_variant,2:3952096:G-T;exonic_variant,2:3952118:A-G;exonic_variant,2:3952016:T-C;exonic_variant,2:3951545:G-A;exonic_v…
AT2G13431	2.40746	-2.0348	0.00161184	0.0274045	UP		NO
AT2G13547	2.59497	-0.983069	4.38198e-08	3.2015e-06	UP		NO
AT2G13610	-0.830701	4.53423	2.54092e-08	2.00424e-06	DOWN		NO
AT2G14170	-0.484162	6.02818	2.23698e-05	0.000783197	DOWN		NO
AT2G14255	-0.456558	5.014	0.000447319	0.00973266	DOWN		NO
AT2G14510	-0.963603	1.04777	0.000127205	0.00340301	DOWN		NO
AT2G14878	0.512697	6.6931	9.4614e-07	4.9637e-05	UP		NO
AT2G15020	2.42507	5.82548	3.21254e-21	2.2082e-18	UP		NO
AT2G15070	3.64654	-2.82051	0.00136457	0.0240629	UP		NO
AT2G15090	-0.954852	6.80951	2.09678e-17	8.82772e-15	DOWN		NO
AT2G15555	6.23137	-1.22193	4.50246e-07	2.56161e-05	UP		NO
AT2G15880	-1.34669	5.04537	2.10811e-11	3.33979e-09	DOWN		NO
AT2G15890	-1.24395	7.82878	2.04998e-14	5.03828e-12	DOWN		YES	2:6921516:TCTGCAATCACATAACCAAATCTAGTCACTATCACTAAATTCTTTGGATTCTCAAATTGAAAAAAAAAACTATAGAATTACTTAC-T;intronic_variant&splice_acceptor_region_variant&splice_donor_region_variant&splice_acceptor_variant&splice_donor_variant
AT2G15940	1.82293	-1.52773	0.000288342	0.00674255	UP		NO
AT2G15960	-0.753355	6.64738	3.25094e-07	1.90426e-05	DOWN		NO
AT2G16140	3.6165	-0.571088	1.64473e-12	2.99438e-10	UP		YES	2:7007838:C-CT;exonic_variant,2:7005448:A-G;exonic_variant,2:7007427:A-G;intronic_variant,2:7007427:A-G;exonic_variant,2:7005387:T-C;exonic_variant,2:7007835:C-T;intronic_variant,2:7007838:C-CT;intronic_variant,2:7007835:C-T;exonic_variant
AT2G16250	-0.448057	3.80694	0.00335179	0.048389	DOWN		NO
AT2G16367	2.49135	-1.60294	6.45093e-06	0.000267908	UP		NO
AT2G16720	0.526823	4.21597	0.000562463	0.011723	UP		NO
AT2G16890	1.09129	1.78194	1.19743e-05	0.000454687	UP		NO
AT2G17230	-2.78593	5.54121	8.87072e-41	2.48979e-37	DOWN		NO
AT2G17480	-0.588763	4.37728	2.5794e-05	0.000884693	DOWN		NO
AT2G17520	-0.357159	5.34463	0.00157176	0.0268296	DOWN		NO
AT2G17695	0.57858	5.41553	1.01907e-07	6.78329e-06	UP		NO
AT2G17780	-0.69545	4.62555	7.49651e-08	5.17398e-06	DOWN		NO
AT2G17880	-0.60214	4.85706	9.97615e-05	0.00276777	DOWN		NO
AT2G18230	0.444613	4.48815	0.001139	0.0207591	UP		NO
AT2G18260	-0.71778	2.3432	0.00043934	0.00959002	DOWN		NO
AT2G18280	-0.364049	7.55126	0.000909978	0.0173944	DOWN		NO
AT2G18450	1.54578	-0.0705465	9.23401e-05	0.00260915	UP		NO
AT2G18670	-0.547597	3.86652	0.000788039	0.0154695	DOWN		NO
AT2G18690	-1.06076	4.78156	0.00115991	0.0210717	DOWN		NO
AT2G18700	-1.05551	7.44682	9.28074e-15	2.38614e-12	DOWN		NO
AT2G19270	-0.398385	4.75565	0.00089428	0.0171445	DOWN		NO
AT2G19650	1.37241	3.23132	3.90274e-16	1.2762e-13	UP		NO
AT2G19800	-1.3423	3.37538	6.48922e-06	0.000268584	DOWN		NO
AT2G19810	-0.454294	5.60525	0.000639839	0.0130767	DOWN		NO
AT2G20120	-0.416094	5.31427	0.000633009	0.0129607	DOWN		YES	2:8687834:G-T;protein_coding;missense;CTA>ATA;L>I
AT2G20340	0.548272	3.30429	0.00178033	0.0294913	UP		NO
AT2G20570	0.918921	6.96921	1.00427e-13	2.24005e-11	UP		NO
AT2G20670	-0.736082	8.74332	0.000760027	0.0150579	DOWN		NO
AT2G20724	-0.542732	3.32482	0.000936962	0.0178192	DOWN		NO
AT2G20835	-0.850657	0.553765	0.00252825	0.0388476	DOWN		NO
AT2G20910	7.22667	-1.91174	1.571e-11	2.54389e-09	UP		NO
AT2G21060	-0.590594	5.08933	4.8449e-06	0.000211374	DOWN		NO
AT2G21210	0.740701	4.91434	1.04216e-05	0.000402534	UP		NO
AT2G21310	4.97006	-2.01188	2.09716e-09	2.15111e-07	UP		NO
AT2G21320	0.575159	4.57159	0.00321186	0.0469029	UP		NO
AT2G21330	0.425942	10.1264	8.42684e-05	0.00241347	UP		YES	2:9128694:ACTGCATACAATAGATAGTTTAACATAAATCTCAAGCATAGTTTCTTCAGCTGCAAAAGTTTACAGTATCAGAGAAAACTTGC-A;intronic_variant,2:9129889:TCTGCAACCCATATCTTAATCATTAACCATTGAAATGAAAATGAAAATGATAATGAAATATACTTGGATTATAGAGTTAATTAC-T;intronic_variant&splice_acceptor_region_variant&splice_donor_region_variant&splice_acceptor_variant&splice_donor_variant,2:9128694:ACTGCATACAATAGATAGTTTAACATAAATCTCAAGCATAGTTTCTTCAGCTGCAAAA…
AT2G21500	-0.507691	3.78862	0.00134806	0.0238341	DOWN		NO
AT2G21830	0.505896	4.46874	0.000234618	0.00566058	UP		NO
AT2G21970	0.508099	6.12342	5.41511e-06	0.000232339	UP		NO
AT2G22122	-0.537775	3.24474	0.00222499	0.035183	DOWN		NO
AT2G22420	-0.560679	3.29649	0.000765039	0.0151138	DOWN		NO
AT2G22430	0.452825	7.87021	6.95763e-05	0.00205022	UP		NO
AT2G22475	-0.52869	3.89238	0.000451626	0.00980103	DOWN		NO
AT2G22510	0.592698	3.15671	0.000784391	0.0154227	UP		NO
AT2G22680	-0.665458	4.0086	0.00042413	0.00931552	DOWN		NO
AT2G22710	3.86401	3.15047	9.69915e-46	5.44462e-42	UP		NO
AT2G22860	-1.66017	1.83785	9.90343e-09	8.59684e-07	DOWN		NO
AT2G23000	0.874058	4.92855	3.82441e-08	2.84978e-06	UP		NO
AT2G23030	-0.811241	3.89632	1.17953e-05	0.000449624	DOWN		NO
AT2G23130	-1.92432	5.57112	9.7287e-35	2.18448e-31	DOWN		NO
AT2G23290	-1.8956	4.04798	1.078e-17	4.77738e-15	DOWN		NO
AT2G23320	-0.827338	5.68393	8.21408e-11	1.13851e-08	DOWN		NO
AT2G23460	-0.433475	5.72691	5.23518e-05	0.00160296	DOWN		NO
AT2G23590	1.35149	0.648693	5.26448e-07	2.95521e-05	UP		NO
AT2G23610	0.557131	4.34121	2.12478e-05	0.000753313	UP		NO
AT2G23670	0.426459	6.54254	0.000662489	0.0134256	UP		NO
AT2G23672	0.489691	4.52852	0.0013595	0.023986	UP		NO
AT2G23790	-0.429715	5.33023	0.00155891	0.0266797	DOWN		NO
AT2G23810	-1.03079	6.32862	2.61636e-09	2.62267e-07	DOWN		NO
AT2G23840	0.547147	5.7342	5.73794e-06	0.000244323	UP		NO
AT2G24160	0.830871	2.99859	0.000552199	0.0115376	UP		NO
AT2G24240	-0.759533	4.123	0.000246411	0.00589025	DOWN		NO
AT2G24260	-0.415757	4.67837	0.00190796	0.0312558	DOWN		NO
AT2G24540	1.12506	5.22757	1.05589e-09	1.17371e-07	UP		NO
AT2G24550	-0.505913	6.10455	0.0023295	0.0364083	DOWN		NO
AT2G24600	-1.9367	2.5068	1.1195e-05	0.000429453	DOWN		NO
AT2G25090	-0.774135	2.84249	7.70606e-05	0.00223556	DOWN		NO
AT2G25180	-0.374916	5.29285	0.0010536	0.0195194	DOWN		YES	2:10727165:TA-T;exonic_variant
AT2G25190	-0.42766	4.40571	0.00138772	0.024331	DOWN		NO
AT2G25200	-0.801703	4.80977	3.43704e-05	0.0011305	DOWN		NO
AT2G25430	-0.350998	6.72658	0.000353912	0.00801083	DOWN		NO
AT2G25460	-0.973297	1.68639	0.00307801	0.0453303	DOWN		NO
AT2G25510	1.58824	6.46024	5.95347e-12	1.0283e-09	UP		NO
AT2G25540	2.17292	-1.78247	0.000894359	0.0171445	UP		NO
AT2G25625	1.4298	3.7294	2.71184e-15	7.80663e-13	UP		NO
AT2G25735	-1.67014	1.62858	0.000948799	0.0179935	DOWN		NO
AT2G25770	-2.7831	0.184945	6.26427e-10	7.30059e-08	DOWN		NO
AT2G25780	-1.86173	-0.901968	9.33492e-05	0.00263324	DOWN		NO
AT2G25790	-0.700898	4.18068	1.80448e-05	0.000650019	DOWN		NO
AT2G25800	-0.471434	5.79743	2.13043e-05	0.000753728	DOWN		NO
AT2G25900	-0.379154	7.55068	0.00316676	0.0463939	DOWN		NO
AT2G26360	0.886775	1.46151	0.000274978	0.00646756	UP		NO
AT2G26440	-1.06839	2.779	0.000369386	0.0082942	DOWN		NO
AT2G26630	2.38998	-0.413373	2.55549e-10	3.23577e-08	UP		NO
AT2G26700	-0.710922	1.91308	0.00216663	0.0344543	DOWN		NO
AT2G26740	-0.612757	7.04727	1.6344e-05	0.000597052	DOWN		NO
AT2G26980	-0.634339	7.32605	5.58174e-09	5.17903e-07	DOWN		NO
AT2G27080	-0.921115	2.78641	4.817e-05	0.00149531	DOWN		YES	2:11567247:A-AT;exonic_variant
AT2G27260	-0.549471	3.85831	0.000240434	0.00577196	DOWN		NO
AT2G27402	2.81688	3.13474	3.73314e-15	1.05661e-12	UP		NO
AT2G27420	2.83132	2.08584	5.02567e-28	7.0529e-25	UP		NO
AT2G27450	0.427589	5.22041	0.000166605	0.00425429	UP		NO
AT2G27500	-0.46104	5.26079	0.00263386	0.0401589	DOWN		NO
AT2G27690	-3.57751	2.21845	2.39802e-09	2.42546e-07	DOWN		NO
AT2G27860	-0.830413	7.63047	7.51279e-12	1.27797e-09	DOWN		NO
AT2G28070	-0.425993	4.95552	0.000967484	0.0182554	DOWN		NO
AT2G28110	-0.641526	4.83635	1.54306e-07	9.73255e-06	DOWN		NO
AT2G28120	-1.83915	4.4494	2.48364e-17	1.00785e-14	DOWN		NO
AT2G28190	-1.42818	7.54438	2.06432e-14	5.03828e-12	DOWN		NO
AT2G28305	-0.672166	5.14686	7.23762e-08	5.03657e-06	DOWN		NO
AT2G28550	0.506732	6.86594	3.62237e-06	0.000164427	UP		NO
AT2G28630	-1.0661	5.07104	5.71407e-08	4.06883e-06	DOWN		NO
AT2G28900	-0.362805	5.32143	0.00127123	0.0227626	DOWN		NO
AT2G29120	0.690686	3.50479	0.00126234	0.0226635	UP		NO
AT2G29130	-1.48938	0.214129	8.39564e-05	0.00240658	DOWN		NO
AT2G29170	0.640405	3.25019	0.00189957	0.0311487	UP		NO
AT2G29340	-0.611911	6.90844	1.57661e-06	7.80908e-05	DOWN		NO
AT2G29510	-0.343826	5.58853	0.00256547	0.039294	DOWN		NO
AT2G29670	-0.709397	7.59933	0.000802989	0.0157333	DOWN		NO
AT2G29910	0.501152	4.0375	0.000388001	0.00864876	UP		NO
AT2G29950	0.905035	1.01601	0.00280799	0.042257	UP		NO
AT2G29970	0.534598	5.54127	6.18116e-06	0.000258618	UP		YES	2:12778232:G-A;protein_coding;stop-gain;TGG>TAG;W>*,2:12778232:G-A;exonic_variant
AT2G30040	-0.955571	3.58202	0.000167942	0.00428521	DOWN		NO
AT2G30250	-0.768001	4.96034	5.67116e-06	0.000241785	DOWN		NO
AT2G30500	-0.442477	6.22011	0.000711197	0.0143093	DOWN		NO
AT2G30590	-0.404807	4.61399	0.00251645	0.038737	DOWN		NO
AT2G30600	-0.914262	7.30221	1.02597e-05	0.000398566	DOWN		NO
AT2G30630	3.08291	-1.58697	5.79882e-08	4.11519e-06	UP		NO
AT2G30640	1.5303	1.08146	1.47013e-09	1.58602e-07	UP		NO
AT2G30670	-2.55315	-0.57689	4.72948e-05	0.00147386	DOWN		NO
AT2G31230	0.918306	2.80569	2.3353e-05	0.000810045	UP		NO
AT2G31380	0.443267	5.92672	0.000915227	0.017471	UP		NO
AT2G31560	1.09558	5.18129	1.62115e-15	4.83204e-13	UP		NO
AT2G31810	-0.823105	6.26193	2.45328e-09	2.47392e-07	DOWN		NO
AT2G32150	-0.470741	7.48596	9.91715e-06	0.0003893	DOWN		NO
AT2G32210	-1.3662	0.829625	0.00253941	0.0389657	DOWN		NO
AT2G32290	1.21919	2.7438	2.66735e-05	0.000908382	UP		NO
AT2G32390	0.593849	3.1977	0.00122606	0.0220946	UP		NO
AT2G32450	-0.44869	4.75696	0.000398165	0.00882857	DOWN		NO
AT2G32530	0.420469	5.55297	0.000957	0.0180879	UP		NO
AT2G32540	0.382118	6.63513	0.000747471	0.0148528	UP		NO
AT2G32990	0.895825	2.78492	0.000260607	0.00616398	UP		YES	2:14005131:TC-T;intronic_variant
AT2G33050	0.92349	3.23013	2.12295e-07	1.30006e-05	UP		NO
AT2G33180	0.524471	4.6998	0.000769284	0.0151522	UP		NO
AT2G33250	0.394932	5.28784	0.00174435	0.0290417	UP		NO
AT2G33510	-0.5285	3.35409	0.00180748	0.029842	DOWN		NO
AT2G33570	-0.867987	4.09874	1.75902e-06	8.57389e-05	DOWN		NO
AT2G33580	-0.893564	2.96451	8.35539e-05	0.00239709	DOWN		NO
AT2G33770	0.545762	7.38455	4.69088e-05	0.00146625	UP		NO
AT2G33830	-1.64425	7.3309	1.8397e-22	1.58879e-19	DOWN		NO
AT2G33850	0.941851	5.0741	1.49203e-08	1.24081e-06	UP		NO
AT2G33855	0.408619	4.72593	0.00176135	0.0292525	UP		NO
AT2G34000	-1.10352	-0.389001	0.00272583	0.041318	DOWN		NO
AT2G34490	0.443548	4.34662	0.00110038	0.0202082	UP		NO
AT2G34510	-1.66578	5.45623	1.13438e-16	3.9799e-14	DOWN		NO
AT2G34600	-4.38421	1.97214	1.99527e-09	2.06778e-07	DOWN		NO
AT2G34655	2.43878	1.46855	1.52718e-09	1.62775e-07	UP		NO
AT2G34730	-0.363609	5.08385	0.0011456	0.0208567	DOWN		YES	2:14655401:A-T;protein_coding;missense;AAA>ATA;K>I,2:14656374:G-A;protein_coding;sense;AAG>AAA;K>K
AT2G34770	-1.06356	5.52193	3.69786e-15	1.05549e-12	DOWN		NO
AT2G34930	-1.06028	1.13717	0.000133325	0.00354141	DOWN		NO
AT2G35060	0.34963	6.99942	0.00283021	0.0424797	UP		NO
AT2G35070	0.979974	2.23512	0.00131027	0.0233129	UP		NO
AT2G35290	-2.30988	0.731337	8.05879e-10	9.13899e-08	DOWN		NO
AT2G35340	-0.605036	2.40509	0.00164903	0.0278401	DOWN	YES	NO
AT2G35470	-0.912724	3.82626	6.84343e-09	6.19606e-07	DOWN		NO
AT2G35630	-0.525767	6.91608	2.34919e-06	0.000110582	DOWN		NO
AT2G35650	-0.521599	4.2013	6.29127e-05	0.00186857	DOWN		NO
AT2G35710	-0.897919	1.55774	0.00109089	0.0200972	DOWN		NO
AT2G35800	-0.370429	6.36037	0.000487692	0.0104447	DOWN		NO
AT2G35830	0.415128	6.47308	9.41411e-05	0.00264451	UP		NO
AT2G35880	-0.455025	5.4703	4.69941e-05	0.00146692	DOWN		NO
AT2G35940	0.327202	6.77119	0.00289905	0.0432623	UP		NO
AT2G36050	-1.11688	3.28853	1.35194e-11	2.2212e-09	DOWN		NO
AT2G36080	-0.587639	5.26568	1.22053e-07	7.90554e-06	DOWN		NO
AT2G36400	-0.715657	4.89245	2.3321e-07	1.41019e-05	DOWN		NO
AT2G36410	-0.729023	5.33755	6.74017e-09	6.13556e-07	DOWN		NO
AT2G36420	-0.79013	4.57752	3.68261e-09	3.56419e-07	DOWN		NO
AT2G36430	0.672381	3.95393	5.47036e-06	0.000234411	UP		NO
AT2G36690	-1.33348	2.90352	8.3282e-09	7.33795e-07	DOWN		NO
AT2G36790	-1.27981	1.79333	2.35077e-06	0.000110582	DOWN		NO
AT2G36870	0.729332	5.29679	4.43677e-05	0.00140267	UP		NO
AT2G37025	-0.735539	3.65732	5.804e-05	0.0017441	DOWN		NO
AT2G37030	-1.53826	1.84055	1.40556e-05	0.000524261	DOWN		NO
AT2G37035	-0.416591	4.18976	0.00121978	0.0220287	DOWN		NO
AT2G37180	-0.457068	5.11813	0.000132473	0.00352435	DOWN		NO
AT2G37200	0.496972	4.30142	0.00160083	0.0272862	UP		NO
AT2G37460	0.515976	3.72727	0.00232164	0.0363191	UP		NO
AT2G37480	-0.582578	4.62255	3.18152e-06	0.00014619	DOWN		NO
AT2G37678	-0.456151	4.03041	0.00141639	0.0247564	DOWN		NO
AT2G37750	-0.562203	4.34997	4.92224e-05	0.00152097	DOWN		NO
AT2G37870	-0.996095	4.94206	4.94144e-06	0.000215308	DOWN		NO
AT2G38080	-0.657075	3.56463	0.00308714	0.0454449	DOWN		NO
AT2G38120	-0.458659	6.73	1.75217e-05	0.000633206	DOWN		NO
AT2G38170	-0.914703	7.56614	3.69924e-10	4.5307e-08	DOWN		NO
AT2G38195	2.62995	0.04332	7.99484e-14	1.8318e-11	UP		NO
AT2G38220	4.25694	0.795739	4.35708e-34	8.15281e-31	UP		NO
AT2G38230	-0.426121	7.72641	0.000514615	0.0109079	DOWN		NO
AT2G38300	0.473401	4.07478	0.00175415	0.029176	UP		NO
AT2G38310	-1.49723	5.62346	3.11764e-11	4.72996e-09	DOWN		NO
AT2G38390	1.01223	2.46779	0.00153762	0.0263958	UP		NO
AT2G38400	-0.453042	5.8261	0.00144701	0.0251479	DOWN		NO
AT2G38410	-0.455184	5.00258	0.00012932	0.00345137	DOWN		NO
AT2G38470	-1.61021	6.2398	2.44348e-07	1.46962e-05	DOWN		YES	2:16109196:C-T;intronic_variant
AT2G38480	-0.550038	2.47259	0.00323248	0.0471109	DOWN		NO
AT2G38560	-0.379204	4.99079	0.000729517	0.0145562	DOWN		NO
AT2G38980	-0.443991	4.68268	0.0029087	0.0433871	DOWN		NO
AT2G39000	0.421898	5.47277	0.000518331	0.010966	UP		NO
AT2G39130	-0.533962	5.07293	4.91463e-05	0.00152002	DOWN		NO
AT2G39180	-0.804491	2.78835	0.000450632	0.00978578	DOWN		NO
AT2G39270	0.444746	4.201	0.00157245	0.0268296	UP		NO
AT2G39280	-0.429426	4.76465	0.00115566	0.0210058	DOWN		NO
AT2G39310	1.75153	7.26009	1.56832e-44	7.54609e-41	UP		NO
AT2G39435	0.863543	2.55452	6.39093e-06	0.000265745	UP		NO
AT2G39470	0.415363	7.40855	7.71595e-05	0.00223632	UP		NO
AT2G39510	1.62156	0.65821	1.78007e-05	0.000641911	UP		NO
AT2G39650	-0.777934	2.13123	0.00209578	0.0336557	DOWN		NO
AT2G39870	-1.31887	5.41304	4.33069e-21	2.86004e-18	DOWN		NO
AT2G39950	0.406244	5.61337	0.000220667	0.00535854	UP		NO
AT2G39980	-0.74077	6.31643	0.000177981	0.00449033	DOWN		NO
AT2G40020	0.610193	4.51446	1.26357e-05	0.000476045	UP		NO
AT2G40100	0.816361	4.00673	5.62674e-05	0.00169664	UP		NO
AT2G40130	2.34404	1.69229	1.72985e-16	5.94522e-14	UP		NO
AT2G40330	-2.48726	-0.145922	1.70035e-05	0.000617445	DOWN		NO
AT2G40410	-0.376075	5.0488	0.000869832	0.0167602	DOWN		NO
AT2G40435	1.17406	1.99117	2.75218e-07	1.64064e-05	UP		NO
AT2G40460	0.495641	5.44259	0.00109713	0.0201604	UP		NO
AT2G40475	1.77389	3.92168	1.89068e-15	5.58595e-13	UP		NO
AT2G40520	-1.02035	3.56683	6.59712e-10	7.66199e-08	DOWN		NO
AT2G40620	-0.703149	4.23461	3.15868e-07	1.85992e-05	DOWN		NO
AT2G40670	0.995777	3.31499	2.50963e-07	1.50672e-05	UP		NO
AT2G40820	-0.768142	4.71467	1.10832e-07	7.27966e-06	DOWN		NO
AT2G40955	4.03966	2.73124	9.67298e-77	1.62898e-72	UP		NO
AT2G40960	0.662933	4.58279	2.00055e-05	0.000716052	UP		NO
AT2G41050	-0.840927	3.10657	1.01739e-05	0.000397067	DOWN		NO
AT2G41100	-2.87017	5.86956	2.34809e-15	6.87706e-13	DOWN		NO
AT2G41260	-1.91985	0.567491	2.80487e-08	2.18178e-06	DOWN		NO
AT2G41280	-1.57593	2.38816	1.93383e-09	2.01652e-07	DOWN		NO
AT2G41310	0.451858	5.22496	0.000107696	0.00294664	UP		NO
AT2G41312	0.943006	1.40444	0.000165059	0.00422122	UP		NO
AT2G41330	-0.869156	2.08939	2.60228e-05	0.000888918	DOWN		NO
AT2G41410	-0.643554	6.85386	1.30709e-07	8.43372e-06	DOWN		NO
AT2G41420	-0.37688	5.36877	0.00064281	0.0131137	DOWN		NO
AT2G41430	-0.765416	9.22052	6.72365e-12	1.14954e-09	DOWN		YES	2:17270074:TGGTAAGTCGGTTTCATTCCCCTGATACATAGAACCATCCAAGATCAGTAGATTTGTGGAGGCTAATTGTTGTTTATATATATCATCA-T;exonic_variant&protein_coding,2:17270074:TGGTAAGTCGGTTTCATTCCCCTGATACATAGAACCATCCAAGATCAGTAGATTTGTGGAGGCTAATTGTTGTTTATATATATCATCA-T;intronic_variant&splice_acceptor_region_variant&splice_donor_region_variant&splice_acceptor_variant&splice_donor_variant&protein_coding
AT2G41480	-0.837188	1.61422	0.000864806	0.0167016	DOWN		NO
AT2G41510	1.06476	2.67857	0.000716416	0.01438	UP		NO
AT2G41550	-0.732147	3.05201	0.000542139	0.0113626	DOWN		NO
AT2G41560	-0.312404	7.48759	0.0034316	0.0493088	DOWN		YES	2:17337451:C-CT;exonic_variant
AT2G41640	-0.781688	5.32188	2.97273e-08	2.29118e-06	DOWN		NO
AT2G41730	-1.95697	0.121512	1.02053e-05	0.000397676	DOWN		NO
AT2G41870	0.4476	5.70575	0.000889263	0.017076	UP		NO
AT2G41900	0.337987	6.92213	0.000914948	0.017471	UP		YES	2:17492629:G-A;protein_coding;sense;TTG>TTA;L>L,2:17492629:G-A;intronic_variant
AT2G41990	-1.82553	-0.0911355	4.81069e-06	0.000210154	DOWN		NO
AT2G42030	-0.642302	5.45449	2.22042e-08	1.77218e-06	DOWN		NO
AT2G42040	-0.449103	4.26231	0.00129545	0.0231103	DOWN		NO
AT2G42170	-0.84241	4.10118	9.40058e-05	0.00264291	DOWN		NO
AT2G42200	0.968128	3.21066	1.77566e-06	8.64248e-05	UP		NO
AT2G42380	-0.811393	4.42601	9.07155e-08	6.12303e-06	DOWN		NO
AT2G42580	-0.917862	5.34864	7.64313e-13	1.48963e-10	DOWN		NO
AT2G42690	0.354295	7.05647	0.00163498	0.0277001	UP		NO
AT2G42860	-1.67091	-1.55578	0.00202012	0.0327429	DOWN		NO
AT2G42870	-2.19254	4.80709	9.87195e-28	1.32999e-24	DOWN		NO
AT2G42900	-1.52039	2.12232	5.61659e-07	3.12682e-05	DOWN		NO
AT2G42960	-0.66442	3.62258	0.0011436	0.0208315	DOWN		NO
AT2G42990	1.87163	-0.599826	6.34682e-05	0.00188175	UP		NO
AT2G43120	-0.726372	2.48711	0.00170381	0.0285645	DOWN		NO
AT2G43400	-0.397894	5.2167	0.00105085	0.0194791	DOWN		NO
AT2G43440	2.00612	0.0123978	1.96856e-06	9.41805e-05	UP		NO
AT2G43510	-1.25013	3.80892	2.42646e-05	0.000838211	DOWN		NO
AT2G43530	-0.755675	4.45865	0.00338818	0.048789	DOWN		NO
AT2G43590	-0.930971	6.28926	0.000950299	0.0180118	DOWN		NO
AT2G43620	1.33587	2.17018	1.00554e-07	6.70648e-06	UP		NO
AT2G43820	-0.877384	6.05815	9.33741e-09	8.16865e-07	DOWN		NO
AT2G43920	0.480913	4.95168	0.000137476	0.00363162	UP		NO
AT2G44070	-2.09471	-0.261636	0.00126323	0.0226675	DOWN		NO
AT2G44080	-0.829724	6.52719	2.1818e-05	0.000767872	DOWN		NO
AT2G44130	-0.467188	5.76691	0.00172425	0.0288354	DOWN		NO
AT2G44280	-0.641282	3.92029	0.000124251	0.00332917	DOWN		NO
AT2G44500	-1.33165	5.50259	9.83127e-13	1.87077e-10	DOWN		NO
AT2G44570	-1.19526	1.68794	0.000469049	0.0101334	DOWN		NO
AT2G44930	1.60035	-0.547754	0.000606289	0.0125125	UP		NO
AT2G44940	1.05767	3.56134	1.65254e-10	2.15733e-08	UP		NO
AT2G45170	-0.415227	5.83251	0.000342746	0.00780001	DOWN		NO
AT2G45180	-0.523162	9.11569	1.19673e-05	0.000454687	DOWN		NO
AT2G45600	0.57121	3.88235	9.73297e-05	0.00271371	UP		NO
AT2G45670	-0.321495	6.79835	0.00133869	0.0237058	DOWN		NO
AT2G45700	-0.44005	5.6	0.000215489	0.00526316	DOWN		NO
AT2G45800	1.02614	0.646731	7.24953e-05	0.00212878	UP		NO
AT2G45850	-0.710894	4.96457	2.53734e-09	2.55105e-07	DOWN		NO
AT2G45970	-0.481852	5.42515	4.42704e-05	0.00140138	DOWN		NO
AT2G46260	-0.367943	5.69479	0.00103195	0.0192081	DOWN		NO
AT2G46310	-1.37155	2.75778	4.42617e-11	6.46961e-09	DOWN		NO
AT2G46330	-0.822201	6.32934	1.08868e-13	2.39659e-11	DOWN		NO
AT2G46430	0.985135	2.95175	0.000388406	0.00865205	UP		NO
AT2G46440	1.94441	1.59963	7.4883e-05	0.00218086	UP		NO
AT2G46450	0.574693	6.0048	1.49364e-06	7.44189e-05	UP		NO
AT2G46510	-0.522225	4.75469	0.00271489	0.0411892	DOWN		NO
AT2G46600	-0.797287	5.03987	3.75893e-05	0.0012197	DOWN		NO
AT2G46640	0.659864	4.42975	5.92022e-05	0.00177243	UP		NO
AT2G46660	1.0335	2.5714	7.50326e-07	4.05646e-05	UP		NO
AT2G46680	0.444404	7.44868	0.00326363	0.0474732	UP		NO
AT2G46730	0.846331	2.97273	3.60486e-05	0.00117621	UP		NO
AT2G46735	0.482807	3.9878	0.00153099	0.0262964	UP		NO
AT2G46780	-1.07786	3.50247	1.06778e-09	1.18302e-07	DOWN		NO
AT2G46790	1.01209	6.03455	1.25915e-09	1.37247e-07	UP		NO
AT2G46810	-0.490542	4.99828	2.78982e-05	0.000936709	DOWN		NO
AT2G46820	0.398096	10.0241	0.000162954	0.00417372	UP		YES	2:19244270:CGGTGAGTAGAAGAATACTACTTTCTTCTTAAAACCCTAGTGTTAAATTTCCTTTATTTGATTCCAAAATTTGTTATTGTGAAACA-C;intronic_variant&splice_acceptor_region_variant&splice_donor_region_variant&splice_acceptor_variant&splice_donor_variant&protein_coding,2:19243885:TGTTCGTTTTCCATAAATCTGAAGATTTTTCTTTTCACTTTTAATTTCGAGTTTAAAGTTTCAAACTTTCGAAATGGGTTTTGGTTTTTAG-T;intronic_variant&splice_acceptor_region_variant&splice_don…
AT2G46870	0.414388	4.85284	0.00099311	0.0186345	UP		NO
AT2G46970	2.0254	-0.751766	7.24986e-06	0.000296338	UP		NO
AT2G46990	-2.21846	0.698945	2.59124e-06	0.000121048	DOWN		NO
AT2G47015	1.53216	2.55166	4.51575e-09	4.26036e-07	UP		NO
AT2G47180	-0.535556	5.14006	0.00139589	0.0244361	DOWN		NO
AT2G47440	-1.85023	6.36012	1.62563e-34	3.42205e-31	DOWN		NO
AT2G47460	1.39308	1.37643	4.2541e-06	0.000188778	UP		NO
AT2G47490	0.406113	4.97739	0.00128018	0.0228742	UP		YES	2:19489329:G-A;exonic_variant
AT2G47750	0.783206	3.04932	0.00097878	0.0184169	UP		NO
AT2G47800	0.509936	4.62395	9.72503e-05	0.00271371	UP		NO
AT2G47930	-0.795176	3.88379	1.28568e-05	0.000482755	DOWN		NO
AT3G01060	0.539473	6.79885	1.06454e-06	5.46301e-05	UP		NO
AT3G01120	0.403897	8.09277	0.000159979	0.00411316	UP		NO
AT3G01140	1.27279	3.11739	9.88948e-11	1.35401e-08	UP		NO
AT3G01310	-0.317354	6.7898	0.00342815	0.0492802	DOWN		NO
AT3G01345	2.1791	1.09599	0.000180976	0.00455564	UP		NO
AT3G01540	-0.338384	8.03324	0.000865932	0.0167137	DOWN		NO
AT3G01550	0.515168	3.87855	0.00332033	0.0480378	UP		YES	3:217535:G-A;protein_coding;missense;CAT>TAT;H>Y,3:217535:G-A;exonic_variant
AT3G01660	0.596968	3.29809	0.000344286	0.00781585	UP		NO
AT3G01980	0.527236	4.10732	0.000196014	0.00487874	UP		NO
AT3G02020	1.28731	5.95003	1.33471e-10	1.77685e-08	UP		NO
AT3G02130	-0.383713	5.25363	0.00125577	0.0225697	DOWN		NO
AT3G02140	-0.846108	1.99439	0.000534998	0.0112437	DOWN		NO
AT3G02170	-0.458739	6.46508	4.2365e-06	0.000188245	DOWN		NO
AT3G02250	-0.579305	5.41965	1.50567e-06	7.48375e-05	DOWN		NO
AT3G02380	0.741554	5.55448	0.000426265	0.00934703	UP		NO
AT3G02800	-0.803253	1.50539	0.00175899	0.0292276	DOWN		NO
AT3G02910	0.438326	4.98736	0.000682959	0.0138072	UP		NO
AT3G03440	0.885987	3.02105	1.20574e-07	7.82479e-06	UP		NO
AT3G03710	-0.332107	6.22592	0.0015496	0.0265608	DOWN		NO
AT3G03830	-1.17215	0.661081	0.000479458	0.010312	DOWN		NO
AT3G04000	-1.03581	3.18874	1.74288e-07	1.08606e-05	DOWN		NO
AT3G04030	1.18689	2.63016	3.30989e-08	2.51648e-06	UP		NO
AT3G04110	0.576815	4.06462	9.08535e-05	0.00257146	UP		NO
AT3G04140	0.803796	4.20198	2.87915e-07	1.70128e-05	UP		NO
AT3G04640	-1.50291	1.95492	9.13886e-06	0.000362979	DOWN		NO
AT3G04890	0.405984	4.35515	0.00294021	0.0437408	UP		NO
AT3G04980	0.730906	1.90459	0.000768905	0.0151522	UP		NO
AT3G05030	0.428142	6.10934	4.8929e-05	0.00151747	UP		NO
AT3G05200	-0.69653	4.72479	5.28158e-08	3.81736e-06	DOWN		NO
AT3G05220	-0.634591	6.71714	8.17718e-07	4.37765e-05	DOWN		NO
AT3G05370	0.485382	3.77378	0.00233901	0.0365231	UP		NO
AT3G05380	-0.395959	4.804	0.00142425	0.0248422	DOWN		YES	3:1541169:G-A;exonic_variant,3:1541169:G-A;protein_coding;missense;GCG>ACG;A>T
AT3G05490	-0.922855	4.81674	1.67029e-06	8.2127e-05	DOWN		NO
AT3G05660	1.07452	0.819054	2.60125e-05	0.000888918	UP		NO
AT3G05727	-2.34938	6.42006	1.24081e-05	0.000468517	DOWN		NO
AT3G05730	-1.90247	5.08348	1.31167e-13	2.8139e-11	DOWN		NO
AT3G05880	-0.410391	6.97213	0.000636656	0.0130195	DOWN		NO
AT3G05900	-0.692522	6.42739	3.18224e-08	2.43041e-06	DOWN		NO
AT3G06070	-1.29026	5.63919	3.373e-09	3.27395e-07	DOWN		NO
AT3G06080	-0.638478	6.35683	1.40708e-07	8.97576e-06	DOWN		NO
AT3G06145	1.13451	2.09795	3.7608e-07	2.16526e-05	UP		NO
AT3G06160	1.31928	-0.209004	0.000304741	0.00707372	UP		NO
AT3G06450	-0.423134	5.08995	0.00114919	0.0208995	DOWN		NO
AT3G06470	-0.472815	4.52029	0.000104771	0.00288065	DOWN		NO
AT3G06490	-1.49199	0.53364	0.000981037	0.0184342	DOWN		NO
AT3G06750	-0.427213	5.1082	0.000757008	0.0150158	DOWN		NO
AT3G06770	-0.956467	4.66303	2.57325e-11	3.9846e-09	DOWN		NO
AT3G06850	-0.540508	5.06684	1.24002e-05	0.000468517	DOWN		NO
AT3G06880	-0.420887	5.77389	0.00144982	0.0251498	DOWN		NO
AT3G07460	-0.647879	5.92507	4.9926e-08	3.61625e-06	DOWN		NO
AT3G07470	-1.04019	5.86801	1.33998e-12	2.49348e-10	DOWN		NO
AT3G07780	-0.3721	6.04263	0.000497762	0.0106027	DOWN		NO
AT3G08600	-0.799757	3.60965	4.62043e-07	2.62006e-05	DOWN		NO
AT3G08660	0.890264	1.44669	0.00120513	0.0217908	UP		NO
AT3G08760	-0.932078	5.16522	1.0633e-12	2.01196e-10	DOWN		YES	3:2660451:A-AT;intronic_variant,3:2660451:A-AT;exonic_variant
AT3G08870	0.742197	2.32538	0.00347628	0.0498657	UP		NO
AT3G09035	-0.4967	3.85659	0.00227632	0.0357264	DOWN		NO
AT3G09220	-0.512158	4.69892	0.000485453	0.0104276	DOWN		NO
AT3G09250	0.440087	4.61549	0.000276592	0.00650097	UP		NO
AT3G09260	0.500867	10.9156	0.000219179	0.0053378	UP		YES	3:2841053:TCCTAAAGAAGAACATCAACATCAATATATTTAGTTCTAAGATAAAATCAACCAAATAATAGTTGACAGTAACAATAGAATCTCTAGTTA-T;intronic_variant&splice_acceptor_region_variant&splice_donor_region_variant&splice_acceptor_variant&splice_donor_variant&protein_coding,3:2841053:TCCTAAAGAAGAACATCAACATCAATATATTTAGTTCTAAGATAAAATCAACCAAATAATAGTTGACAGTAACAATAGAATCTCTAGTTA-T;intronic_variant&splice_acceptor_region_variant&splice_do…
AT3G09405	0.897238	1.54795	0.000357156	0.00807392	UP		NO
AT3G09450	2.44136	2.72632	5.54527e-15	1.51846e-12	UP		NO
AT3G09780	-0.724467	2.8685	0.000646754	0.0131585	DOWN		NO
AT3G09880	-0.376647	5.0073	0.000713007	0.0143372	DOWN		NO
AT3G10010	-0.550537	4.17547	0.000107987	0.00295219	DOWN		NO
AT3G10020	-0.694219	7.37044	4.48167e-12	7.90299e-10	DOWN		NO
AT3G10120	-1.18917	4.22774	4.82095e-12	8.45701e-10	DOWN		NO
AT3G10280	-2.29111	-2.23445	0.0022669	0.035595	DOWN		NO
AT3G10300	-0.62517	4.61879	6.43826e-05	0.00190578	DOWN		NO
AT3G10420	0.447325	6.90751	0.000273185	0.00642988	UP		NO
AT3G10450	-0.952707	4.66129	1.21561e-13	2.62456e-11	DOWN		NO
AT3G10490	-0.356789	4.99046	0.00148057	0.0255729	DOWN		NO
AT3G10525	0.506392	4.44739	0.000305271	0.00708115	UP		NO
AT3G10640	-0.419484	4.50741	0.00133721	0.0236969	DOWN		NO
AT3G10720	-0.969642	6.49895	1.50602e-21	1.1272e-18	DOWN		NO
AT3G10915	-0.441234	4.28917	0.000620115	0.0127432	DOWN		NO
AT3G10940	0.607076	5.29556	1.04389e-07	6.92111e-06	UP		NO
AT3G10985	-0.711602	6.75513	1.96927e-07	1.21478e-05	DOWN		NO
AT3G11010	0.626038	3.32476	0.00177411	0.0294063	UP		NO
AT3G11580	-0.931826	3.14492	2.8565e-05	0.000954461	DOWN		NO
AT3G11650	-0.580606	2.84377	0.00069263	0.0139691	DOWN		NO
AT3G11660	0.590313	5.6779	9.67111e-07	5.05012e-05	UP		NO
AT3G11700	-0.500957	6.29655	1.90957e-06	9.17493e-05	DOWN		NO
AT3G11760	-0.623652	4.21136	1.01663e-05	0.000397067	DOWN		NO
AT3G11820	-0.613032	4.61758	0.000172682	0.00437959	DOWN		NO
AT3G12150	-0.462788	4.54253	0.000185876	0.00465117	DOWN		NO
AT3G12170	0.778899	1.27358	0.00295879	0.0439396	UP		YES	3:3882684:G-A;exonic_variant
AT3G12320	0.759084	6.19061	1.07078e-05	0.000413114	UP		NO
AT3G12400	-0.501439	4.9535	2.67025e-05	0.00090845	DOWN		NO
AT3G12460	-1.64247	-0.400362	7.8048e-05	0.00225836	DOWN		NO
AT3G12550	-0.922222	3.59693	1.42663e-05	0.000530197	DOWN		NO
AT3G12560	0.550997	4.90925	3.89052e-06	0.000175652	UP		NO
AT3G12920	-0.443236	4.67557	0.00238935	0.037137	DOWN		NO
AT3G13000	-0.566469	4.51517	7.89658e-05	0.002281	DOWN		NO
AT3G13061	0.460106	4.73435	0.000340978	0.00776574	UP		NO
AT3G13065	0.960972	4.59349	1.69775e-11	2.73598e-09	UP		NO
AT3G13080	-0.685049	6.19156	4.65136e-07	2.63298e-05	DOWN		NO
AT3G13277	-0.608174	3.68194	0.000140269	0.00369094	DOWN		NO
AT3G13450	-0.956069	5.72984	1.09239e-09	1.20632e-07	DOWN		NO
AT3G13520	-0.67112	5.92969	7.44995e-08	5.1524e-06	DOWN		NO
AT3G13750	-1.09776	9.29578	1.05134e-14	2.6826e-12	DOWN		NO
AT3G13980	0.715869	2.3636	0.000937739	0.0178195	UP		NO
AT3G14050	-0.420452	5.57366	0.00181348	0.0299118	DOWN		NO
AT3G14060	-0.769951	2.49219	6.74556e-05	0.00199121	DOWN		NO
AT3G14067	0.349259	8.1654	0.0024131	0.0373854	UP		NO
AT3G14090	-0.71239	4.4047	1.02887e-06	5.3068e-05	DOWN		NO
AT3G14210	0.717058	9.67703	2.70417e-06	0.0001258	UP		NO
AT3G14230	-0.412389	7.35049	0.00165758	0.0279703	DOWN		NO
AT3G14440	1.4212	4.70079	9.81833e-08	6.57438e-06	UP		NO
AT3G14720	0.415615	5.29555	0.000788149	0.0154695	UP		NO
AT3G14810	0.760615	4.64352	1.52314e-06	7.55534e-05	UP		NO
AT3G14900	0.995547	3.19326	0.000315707	0.00726817	UP		NO
AT3G14990	-0.452418	7.07972	5.0089e-05	0.00154068	DOWN		NO
AT3G15040	-0.432153	3.83843	0.00319156	0.0466761	DOWN		NO
AT3G15060	-0.626607	2.94593	0.00119598	0.0216452	DOWN		NO
AT3G15115	-0.488621	4.23538	0.000307866	0.00712173	DOWN		NO
AT3G15310	5.75251	3.73161	6.28795e-55	4.23569e-51	UP		NO
AT3G15320	3.40872	-2.46821	0.000182317	0.00458255	UP		NO
AT3G15440	-1.83513	-0.0696857	1.46424e-05	0.000542543	DOWN		NO
AT3G15450	-1.56616	8.98073	8.80643e-14	1.99067e-11	DOWN		YES	3:5213253:AAGGTATATACTAATATACATAAAACACATATATACAAGTCAAATCTCTAAATCCAATTCATAGATTCATAATGGTTTTGTTGTTTTGCTC-A;intronic_variant&splice_acceptor_region_variant&splice_donor_region_variant&splice_donor_variant&protein_coding
AT3G15500	-1.45365	4.04021	1.8927e-08	1.53241e-06	DOWN		NO
AT3G15620	-0.894375	1.53657	0.000278874	0.00655003	DOWN		NO
AT3G15630	-1.12774	4.37217	4.21932e-08	3.09537e-06	DOWN		NO
AT3G15760	0.552131	3.9484	0.00306577	0.0451836	UP		NO
AT3G15820	-0.456218	4.33952	0.000672391	0.0136087	DOWN		NO
AT3G16150	-1.13107	0.583719	0.000928049	0.0176796	DOWN		NO
AT3G16240	-0.539482	9.57893	9.3629e-05	0.00263672	DOWN		NO
AT3G16400	0.756871	8.85054	3.31509e-09	3.2364e-07	UP		NO
AT3G16420	0.4374	8.78517	0.000948303	0.0179935	UP		NO
AT3G16430	0.540718	5.2387	0.00064545	0.0131435	UP		NO
AT3G16520	0.283646	7.82586	0.00310309	0.0456	UP		NO
AT3G16660	-1.11691	3.38291	1.26938e-05	0.000477699	DOWN		NO
AT3G16670	-2.59713	3.96493	5.3702e-08	3.86482e-06	DOWN		YES	3:5682341:C-CTA;exonic_variant
AT3G16690	-0.932892	3.23844	9.35318e-05	0.00263619	DOWN		NO
AT3G16720	-0.864881	3.99563	4.22291e-05	0.00134817	DOWN		NO
AT3G16750	-0.548204	3.54592	0.000532862	0.0112171	DOWN		NO
AT3G16857	-0.455677	6.31512	4.05894e-06	0.000182279	DOWN		NO
AT3G17340	0.386733	4.66475	0.00231837	0.0362849	UP		NO
AT3G17390	-0.628359	8.39322	2.53147e-06	0.00011842	DOWN		YES	3:5952914:C-T;protein_coding;missense;GGC>GAC;G>D
AT3G17520	1.50739	2.2706	1.0225e-05	0.000397676	UP		NO
AT3G17611	0.592441	2.88617	0.00107888	0.019944	UP		NO
AT3G18320	-0.733196	3.73513	2.19881e-06	0.000104014	DOWN		NO
AT3G18490	0.36909	8.39644	0.000567864	0.0118282	UP		NO
AT3G18500	0.379543	5.08149	0.00133749	0.0236969	UP		NO
AT3G18520	-0.342635	5.29443	0.00214058	0.0341691	DOWN		NO
AT3G18560	-0.827949	3.6505	4.30894e-07	2.45982e-05	DOWN		NO
AT3G19010	-0.59388	5.75384	0.000148164	0.00386247	DOWN		NO
AT3G19270	1.16208	2.23243	4.37704e-05	0.00138817	UP		NO
AT3G19540	-0.455884	4.7327	0.000198009	0.00491716	DOWN		NO
AT3G19680	-3.64339	6.72261	9.15815e-43	3.8557e-39	DOWN		YES	3:6841125:C-T;protein_coding;sense;TCC>TCT;S>S
AT3G19720	-0.622764	6.40009	8.34428e-09	7.33795e-07	DOWN		NO
AT3G19930	-0.972361	5.95129	9.13961e-10	1.0261e-07	DOWN		NO
AT3G19970	-0.80196	3.21525	0.000349612	0.00792078	DOWN		NO
AT3G20340	-1.51914	2.37574	1.22717e-09	1.34196e-07	DOWN		NO
AT3G20350	-0.511698	3.81622	0.000604379	0.0124807	DOWN		NO
AT3G20370	0.945668	5.87035	9.75129e-08	6.5425e-06	UP		NO
AT3G20395	-1.29023	4.42595	6.27278e-11	8.95226e-09	DOWN		NO
AT3G20410	-0.404525	5.54277	0.00301647	0.0446192	DOWN		NO
AT3G20620	0.462335	3.92344	0.000828969	0.016139	UP		NO
AT3G20630	-0.333918	5.64993	0.00314858	0.0461677	DOWN		NO
AT3G20660	-1.12705	3.72403	2.4787e-10	3.15039e-08	DOWN		NO
AT3G20810	0.8779	1.95624	0.000300044	0.00698396	UP		YES	3:7276276:G-A;protein_coding;missense;GAA>AAA;E>K
AT3G21010	-1.13604	1.02009	1.03029e-05	0.000399782	DOWN		NO
AT3G21020	-1.76033	-0.0922675	9.41159e-08	6.33983e-06	DOWN		NO
AT3G21030	-2.16946	-0.579645	1.06565e-06	5.46301e-05	DOWN		NO
AT3G21150	1.24381	1.98574	0.00015149	0.00393698	UP		NO
AT3G21460	-0.946132	2.95906	1.24669e-06	6.31427e-05	DOWN		NO
AT3G21500	-2.87677	1.25452	0.00129184	0.0230703	DOWN		NO
AT3G21510	-0.647156	5.20705	5.03409e-05	0.00154561	DOWN		NO
AT3G21520	-1.13672	1.67849	0.000208095	0.00510105	DOWN		NO
AT3G21550	-0.840336	2.59297	0.00100893	0.0188682	DOWN		NO
AT3G21650	-0.363421	4.6288	0.00245591	0.0379612	DOWN		NO
AT3G21670	0.54901	7.07673	0.000130293	0.00347183	UP		NO
AT3G21680	1.09432	0.373249	0.00232311	0.0363253	UP		NO
AT3G21700	0.868933	3.80063	1.58466e-08	1.30178e-06	UP		NO
AT3G21750	0.729013	4.72454	3.2883e-07	1.91913e-05	UP		NO
AT3G21760	0.874306	5.10259	1.32373e-09	1.43821e-07	UP		YES	3:7668023:C-T;protein_coding;missense;CGC>TGC;R>C
AT3G21800	1.92424	-1.23687	0.000800215	0.0156972	UP		NO
AT3G21890	1.91447	1.59656	5.48964e-07	3.06628e-05	UP		NO
AT3G21950	1.22832	1.4567	7.97732e-06	0.000320675	UP		NO
AT3G22060	-0.708255	4.40959	0.000521019	0.0110091	DOWN		NO
AT3G22100	1.66836	1.12403	2.76605e-08	2.15656e-06	UP		NO
AT3G22120	-0.63411	9.26428	0.000206136	0.00506779	DOWN		NO
AT3G22275	-8.36637	-0.595107	3.07839e-10	3.8544e-08	DOWN		YES	3:7879478:G-GA;exonic_variant,3:7879478:G-GA;intronic_variant
AT3G22530	0.453113	4.40596	0.000706574	0.0142248	UP		NO
AT3G22550	1.22507	3.86601	9.42619e-13	1.80388e-10	UP		NO
AT3G22560	1.26452	0.369024	1.54582e-05	0.000569014	UP		NO
AT3G22565	2.04112	-2.33463	0.00328596	0.0476429	UP		NO
AT3G22640	-2.32907	1.79571	3.16192e-17	1.2529e-14	DOWN		NO
AT3G22840	0.893811	3.11442	0.000234225	0.00565583	UP		NO
AT3G22886	-2.57597	2.17715	3.51419e-16	1.16041e-13	DOWN		NO
AT3G22961	-1.71195	0.771535	7.13378e-08	4.98931e-06	DOWN		NO
AT3G22968	0.48	6.79325	8.5043e-06	0.000339376	UP		NO
AT3G23000	0.470393	7.42997	0.00138435	0.0242972	UP		NO
AT3G23010	1.17881	0.597422	0.00132777	0.023562	UP		NO
AT3G23030	-0.448284	6.97099	4.6779e-05	0.00146428	DOWN		NO
AT3G23085	1.74278	-0.529297	0.00250372	0.0385939	UP		NO
AT3G23110	1.25876	1.07421	0.000220487	0.00535803	UP		NO
AT3G23240	-1.89595	1.86574	9.2267e-05	0.00260915	DOWN		NO
AT3G23530	-0.441877	6.05135	0.000134706	0.00356965	DOWN		NO
AT3G23635	-2.36054	-2.41372	0.00224776	0.0354345	DOWN		NO
AT3G23730	-1.61749	4.99623	3.89767e-23	3.75079e-20	DOWN		NO
AT3G23740	0.793173	1.93732	0.00130366	0.0232321	UP		NO
AT3G23750	-0.802785	6.11059	6.64855e-14	1.55445e-11	DOWN		NO
AT3G23790	-0.47038	3.85971	0.00299129	0.044305	DOWN		NO
AT3G23880	-0.486864	4.23513	0.00267376	0.0406759	DOWN		NO
AT3G23920	0.341427	7.13509	0.00259223	0.0395779	UP		NO
AT3G24140	-0.47669	3.90965	0.00130733	0.0232728	DOWN		NO
AT3G24460	1.53316	5.828	9.90755e-18	4.44928e-15	UP		YES	3:8891041:G-GAA;intronic_variant
AT3G24463	1.88936	2.7971	9.69245e-14	2.17634e-11	UP		NO
AT3G24530	-0.424996	4.34815	0.00177402	0.0294063	DOWN		NO
AT3G24550	-0.548197	6.20082	1.5918e-06	7.87277e-05	DOWN		NO
AT3G24750	2.35671	2.17848	6.81555e-15	1.80752e-12	UP		NO
AT3G24870	1.6852	6.02153	1.15803e-35	3.00027e-32	UP		NO
AT3G24880	0.3209	5.29705	0.00341073	0.0490716	UP		NO
AT3G25500	-0.442832	5.68524	0.000197397	0.00490665	DOWN		NO
AT3G25600	-0.76984	3.5004	0.000943814	0.0179192	DOWN		NO
AT3G25717	0.503905	4.78524	0.000955452	0.018076	UP		NO
AT3G26070	0.277313	7.4942	0.00343716	0.0493676	UP		NO
AT3G26165	-0.454194	5.17187	0.00219618	0.0348748	DOWN		NO
AT3G26220	-0.934945	4.8906	4.43479e-07	2.52738e-05	DOWN		NO
AT3G26240	-0.444373	4.83235	0.000226575	0.00549802	DOWN		NO
AT3G26290	0.513272	6.9614	2.83689e-07	1.68517e-05	UP		NO
AT3G26450	0.434139	7.04737	0.000424516	0.00931552	UP		NO
AT3G26480	1.13112	1.27059	0.000102884	0.00283802	UP		NO
AT3G26570	0.317685	8.18093	0.0016069	0.0273482	UP		NO
AT3G26740	-0.489598	9.8552	0.00129495	0.0231103	DOWN		YES	3:9828064:CGTAAGTCCTTTTGATCACTTCCTCAGTTCATCCCCTCTTGTTTCTCTTCTCATTGACTTACTCAATAACATCTCTATACTCAG-C;intronic_variant&splice_acceptor_region_variant&splice_donor_region_variant&splice_acceptor_variant&splice_donor_variant,3:9828300:CGTAAGTGTTTTTCACATTTTTTAAAACCCTTTCCTTAGCTTGATTTTTCATCTCTGAGTTTTGTGATTTTTGGACTTGGAAACAG-C;intronic_variant&splice_acceptor_region_variant&splice_donor_region_variant&splice…
AT3G26760	-1.09012	2.21172	7.27283e-06	0.000296917	DOWN		NO
AT3G26790	1.27655	-0.275938	0.00184395	0.0303252	UP		YES	3:9860463:C-CA;exonic_variant,3:9860832:G-A;exonic_variant
AT3G26910	-0.506189	4.40895	0.00151544	0.0260682	DOWN		NO
AT3G27025	0.891564	2.82482	0.000246106	0.00588715	UP		NO
AT3G27040	1.69185	-0.199224	0.000258848	0.00613963	UP		NO
AT3G27200	-0.777003	2.65684	0.000449478	0.00977331	DOWN		NO
AT3G27220	0.523135	4.12112	0.000728622	0.014547	UP		NO
AT3G27470	0.400805	4.3643	0.00287763	0.0430953	UP		NO
AT3G27490	-3.11169	-2.49851	0.000559785	0.0116816	DOWN		NO
AT3G27580	-0.49626	4.14058	0.00188436	0.0309143	DOWN		NO
AT3G27925	0.322824	7.23463	0.00108404	0.0200173	UP		NO
AT3G27940	0.687073	1.16535	0.00306671	0.0451836	UP		NO
AT3G28080	0.700564	3.92001	3.9235e-06	0.000176668	UP		NO
AT3G28100	0.431718	4.94232	0.000124346	0.00332917	UP		NO
AT3G28160	-1.08396	4.51116	2.25371e-13	4.71474e-11	DOWN		YES	3:10496355:C-A;exonic_variant
AT3G28180	-1.27958	6.20685	1.88755e-21	1.35265e-18	DOWN		NO
AT3G28200	-1.04385	6.12622	5.47284e-16	1.73897e-13	DOWN		NO
AT3G28270	1.81088	5.84053	7.34732e-15	1.93332e-12	UP		NO
AT3G28740	-0.542627	4.96124	0.0022895	0.0358831	DOWN		NO
AT3G28770	-3.81665	-1.57326	3.29342e-07	1.91913e-05	DOWN		NO
AT3G28840	1.63729	-1.08862	0.00179679	0.0297092	UP		NO
AT3G28910	-0.557104	4.11932	0.000822804	0.0160375	DOWN		NO
AT3G29030	0.61617	2.94519	0.00277001	0.0418371	UP		NO
AT3G29180	-0.384467	6.38724	0.000360008	0.00811609	DOWN		NO
AT3G29240	-0.421823	8.4517	7.34431e-05	0.00214912	DOWN		NO
AT3G29250	1.49773	3.58141	6.12768e-06	0.000257019	UP		NO
AT3G29370	-1.54365	3.29865	1.38477e-13	2.95192e-11	DOWN		NO
AT3G29410	0.923663	2.53285	0.000574471	0.0119363	UP		NO
AT3G29670	-0.997633	2.67267	9.53208e-07	4.98525e-05	DOWN		NO
AT3G29810	-0.96184	2.90316	1.67639e-06	8.21868e-05	DOWN		NO
AT3G30393	2.89422	-1.26155	4.91315e-05	0.00152002	UP		NO
AT3G33528	1.07089	1.6143	0.000249245	0.00593694	UP		NO
AT3G41762	1.84748	0.378688	0.000385733	0.00860485	UP		YES	3:14195675:G-A;exonic_variant,3:14196330:T-TG;intronic_variant,3:14196560:A-G;exonic_variant,3:14195685:T-A;exonic_variant,3:14195873:T-TG;exonic_variant&protein_coding
AT3G42820	1.6036	-0.762045	1.21179e-05	0.000459105	UP		NO
AT3G43190	0.891588	4.05255	0.00164592	0.0278015	UP		NO
AT3G43625	4.1909	-2.65037	4.69292e-05	0.00146625	UP		NO
AT3G43850	-1.52583	1.89394	1.54166e-08	1.27579e-06	DOWN		NO
AT3G43920	-0.679575	3.71791	4.10064e-06	0.000183616	DOWN		NO
AT3G44042	2.77512	-2.78484	0.00300548	0.0444957	UP		YES	3:15813153:T-C;exonic_variant
AT3G44120	-1.00082	0.407766	0.00249271	0.0384418	DOWN		NO
AT3G44260	-1.39027	4.44355	2.15565e-05	0.000761853	DOWN		NO
AT3G44310	0.459923	9.71787	0.000118293	0.00319762	UP		YES	3:15987027:ATAGGTAACCAATCCATTAATTCATCCTCTGACCTATTTTTATTTTTATTTTTTGATATGTAAAATTTATCGAAAACGTTCCATTTCAATATG-A;intronic_variant&splice_donor_region_variant&splice_acceptor_region_variant&exonic_variant&splice_donor_variant&protein_coding
AT3G44450	1.64822	1.4829	5.48761e-10	6.54347e-08	UP		NO
AT3G44670	-0.294843	6.71521	0.00225718	0.0354755	DOWN		NO
AT3G44720	-0.668994	5.18333	2.2858e-07	1.38717e-05	DOWN		NO
AT3G44990	0.586202	7.22861	2.02765e-05	0.000724212	UP		NO
AT3G45070	1.16217	2.20996	9.50843e-06	0.000375444	UP		NO
AT3G45210	0.93629	4.21632	3.3046e-10	4.092e-08	UP		NO
AT3G45230	-0.653218	3.17976	0.000505526	0.0107288	DOWN		NO
AT3G45260	-0.943874	3.89023	1.33375e-07	8.55655e-06	DOWN		NO
AT3G45280	-1.02053	0.975559	0.00147289	0.0254664	DOWN		NO
AT3G45300	-1.01126	6.97704	8.2754e-13	1.60186e-10	DOWN		NO
AT3G45640	-0.67497	6.33013	0.00014242	0.00373628	DOWN		NO
AT3G45775	6.38047	-2.49753	4.22751e-08	3.09537e-06	UP		NO
AT3G45840	1.51422	-0.858336	0.000336697	0.007704	UP		NO
AT3G45970	-2.04931	3.18212	2.0057e-14	4.96721e-12	DOWN		NO
AT3G46590	0.359067	6.80689	0.000607953	0.0125315	UP		NO
AT3G46600	-1.13754	6.40661	8.21253e-08	5.59931e-06	DOWN		NO
AT3G46650	1.24868	0.593246	2.73842e-05	0.000924175	UP		NO
AT3G46670	0.513827	4.2571	0.000371442	0.00833479	UP		NO
AT3G46900	0.841665	3.51583	0.00010763	0.00294664	UP		NO
AT3G46940	0.691924	2.84295	0.00143744	0.0250204	UP		NO
AT3G47010	-1.13007	2.74529	1.99006e-06	9.50739e-05	DOWN		NO
AT3G47040	-1.45508	0.557544	6.88469e-06	0.00028313	DOWN		NO
AT3G47250	-0.403012	7.1106	8.68863e-05	0.00247791	DOWN		NO
AT3G47340	-2.19467	8.33816	5.36154e-33	9.50431e-30	DOWN		NO
AT3G47420	1.25785	6.36388	2.47628e-08	1.96244e-06	UP		NO
AT3G47430	0.782382	5.73058	7.16415e-10	8.23535e-08	UP		NO
AT3G47500	0.96985	6.13199	7.09377e-11	1.00389e-08	UP		NO
AT3G47680	-0.386108	4.92967	0.000767511	0.015135	DOWN		NO
AT3G47800	-1.05154	5.82426	4.42791e-17	1.69473e-14	DOWN		NO
AT3G47875	-1.72079	-0.341271	5.00747e-05	0.00154068	DOWN		NO
AT3G47960	-0.363513	5.5602	0.00170227	0.0285645	DOWN		NO
AT3G48100	-0.658775	3.57669	0.000866488	0.0167149	DOWN		NO
AT3G48240	1.4656	2.26318	1.42777e-05	0.000530197	UP		NO
AT3G48260	0.753983	2.5271	0.00023052	0.0055777	UP		NO
AT3G48280	0.875104	3.07598	2.29751e-05	0.00080106	UP		NO
AT3G48310	0.712905	4.69786	2.47231e-05	0.000852303	UP		NO
AT3G48320	0.468562	4.31025	0.00297195	0.0440961	UP		NO
AT3G48360	-2.91572	7.69301	6.88416e-42	2.5674e-38	DOWN		NO
AT3G48390	-1.101	2.94824	2.30488e-09	2.33827e-07	DOWN		NO
AT3G48460	0.736764	4.87965	5.39105e-06	0.000231602	UP		NO
AT3G48490	0.840965	0.682409	0.00318445	0.0465922	UP		NO
AT3G48530	-0.348633	6.80312	0.00111074	0.0203651	DOWN		NO
AT3G48580	-2.47111	1.40253	2.44742e-15	7.10618e-13	DOWN		NO
AT3G48990	-0.317767	9.00136	0.00184921	0.0303821	DOWN		NO
AT3G49110	-0.939575	3.51498	0.0014836	0.0255989	DOWN		NO
AT3G49530	-1.19955	4.64035	3.76864e-15	1.05776e-12	DOWN		NO
AT3G49780	-1.01853	4.74056	1.09594e-11	1.83254e-09	DOWN		NO
AT3G49790	-0.784102	6.14688	9.56962e-08	6.43342e-06	DOWN		NO
AT3G49810	-0.52086	4.34248	9.72789e-05	0.00271371	DOWN		NO
AT3G49940	-0.587495	6.00314	0.000114327	0.00310536	DOWN		NO
AT3G50060	-2.28016	4.59823	4.5604e-26	5.11996e-23	DOWN		NO
AT3G50240	-0.509867	5.54948	2.4645e-06	0.000115769	DOWN		NO
AT3G50330	-2.62493	2.2134	1.07308e-14	2.71747e-12	DOWN		NO
AT3G50340	-0.75713	5.11404	1.00916e-08	8.7153e-07	DOWN		NO
AT3G50440	0.474455	5.72221	0.000996101	0.0186802	UP		NO
AT3G50560	-0.925937	3.27259	7.22592e-08	5.03657e-06	DOWN		NO
AT3G50630	0.846246	3.27909	2.71074e-05	0.000917593	UP		NO
AT3G50660	-0.563583	3.76477	0.000219008	0.00533749	DOWN		NO
AT3G50685	0.411688	6.38353	4.55314e-05	0.00143322	UP		NO
AT3G50700	-0.497864	4.18121	0.00119202	0.0215939	DOWN		NO
AT3G50750	0.685855	4.73249	1.84855e-06	8.94555e-05	UP		NO
AT3G50760	1.52186	2.20922	7.24984e-11	1.02168e-08	UP		NO
AT3G50800	-1.41494	2.20682	2.82979e-08	2.19104e-06	DOWN		NO
AT3G50840	0.668679	5.07795	1.02928e-07	6.83771e-06	UP		NO
AT3G50970	-0.681098	4.94616	7.97646e-06	0.000320675	DOWN		NO
AT3G51075	0.668011	2.88084	0.000530909	0.01119	UP		NO
AT3G51180	0.783441	1.68058	0.0010467	0.019413	UP		YES	3:19013922:GT-G;intronic_variant
AT3G51220	-1.17014	0.0287518	0.000824223	0.0160559	DOWN		NO
AT3G51240	0.441632	5.10375	0.000105136	0.00288831	UP		NO
AT3G51400	-2.13136	0.846389	7.13598e-10	8.23106e-08	DOWN		NO
AT3G51490	1.2305	-0.953005	0.00215644	0.0343248	UP		NO
AT3G51550	-0.493683	7.71326	4.15607e-06	0.000184915	DOWN		NO
AT3G52240	-0.348417	5.68188	0.000850853	0.0164888	DOWN		NO
AT3G52290	-0.451536	4.06417	0.00156742	0.026771	DOWN		NO
AT3G52500	-0.670964	6.12772	1.06661e-08	9.11785e-07	DOWN		NO
AT3G52540	0.935266	0.954711	0.000170226	0.00432383	UP		NO
AT3G52720	0.628314	5.47149	0.000721719	0.0144177	UP		NO
AT3G52740	0.771924	3.47312	1.43823e-05	0.000533491	UP		NO
AT3G53100	-0.55138	4.47283	0.00286364	0.042924	DOWN		NO
AT3G53200	-1.80416	-0.431298	0.000623293	0.0127929	DOWN		NO
AT3G53380	-0.544683	4.03284	0.000719762	0.0144042	DOWN		NO
AT3G53460	-0.547796	8.50095	4.36111e-05	0.00138572	DOWN		NO
AT3G53540	-0.502029	6.25329	4.27844e-07	2.44655e-05	DOWN		NO
AT3G53800	-0.453321	5.28596	0.00162157	0.0275144	DOWN		NO
AT3G53980	-0.771791	6.52817	7.48852e-05	0.00218086	DOWN		NO
AT3G53990	-0.384333	6.42143	0.000526505	0.011111	DOWN		YES	3:19989622:G-GT;exonic_variant
AT3G54400	-0.755301	7.13679	1.83984e-06	8.91622e-05	DOWN		NO
AT3G54500	-0.629489	8.3124	2.72974e-08	2.14313e-06	DOWN		NO
AT3G54600	0.751951	5.42909	3.62064e-07	2.09531e-05	UP		NO
AT3G54620	-0.340169	6.05069	0.00138059	0.0242555	DOWN		NO
AT3G54670	-0.355678	5.91698	0.00120532	0.0217908	DOWN	YES	NO
AT3G54730	3.38743	1.98857	2.49113e-26	2.89324e-23	UP		NO
AT3G54810	-2.00184	6.01388	4.74238e-28	6.9447e-25	DOWN		NO
AT3G54823	1.98989	-1.05781	0.000714426	0.0143486	UP		NO
AT3G54830	-0.821018	3.81744	8.1369e-06	0.000326261	DOWN		NO
AT3G54920	-0.760461	5.99161	8.23768e-07	4.39704e-05	DOWN		NO
AT3G55110	0.807663	3.00779	2.02206e-05	0.000722984	UP		NO
AT3G55130	1.0036	4.99963	5.58051e-09	5.17903e-07	UP		NO
AT3G55240	1.11084	5.52479	2.25781e-10	2.8805e-08	UP		NO
AT3G55330	0.331907	6.96234	0.00101024	0.0188813	UP		NO
AT3G55430	-0.702573	5.91036	1.57389e-09	1.66699e-07	DOWN		YES	3:20551358:C-CA;intronic_variant
AT3G55840	-0.811861	1.14885	0.00205908	0.0332145	DOWN		NO
AT3G55970	-2.1663	3.07025	1.10072e-07	7.25508e-06	DOWN		NO
AT3G55980	-2.01245	5.89564	2.75094e-09	2.73317e-07	DOWN		NO
AT3G56050	0.492686	6.56137	2.32849e-06	0.00010984	UP		NO
AT3G56070	0.491259	4.75865	0.00228357	0.0358068	UP	YES	NO
AT3G56080	0.576718	5.67486	8.85841e-06	0.000352255	UP		NO
AT3G56240	0.507338	8.24767	0.000117163	0.0031747	UP		NO
AT3G56260	1.25609	1.03543	4.13853e-06	0.000184378	UP		NO
AT3G56400	-1.33232	4.69415	1.88236e-05	0.000676624	DOWN		NO
AT3G56590	0.43551	5.08743	0.00142337	0.0248396	UP		NO
AT3G56600	1.40774	-0.171321	0.000169706	0.00431712	UP		NO
AT3G56660	1.78086	-1.45671	0.000764737	0.0151138	UP		NO
AT3G56880	-0.811987	5.46446	3.4464e-07	2.00135e-05	DOWN		NO
AT3G57062	0.640511	4.19006	2.72957e-05	0.000922113	UP		NO
AT3G57330	-0.438194	5.27991	0.00318139	0.0465678	DOWN		NO
AT3G57410	-0.364731	7.98836	0.000175515	0.00444142	DOWN		NO
AT3G57420	-0.400306	4.75295	0.000765987	0.0151138	DOWN		NO
AT3G57450	-0.888658	4.25823	5.97138e-07	3.29708e-05	DOWN		NO
AT3G57530	-0.625359	5.89885	0.000142709	0.00374054	DOWN		NO
AT3G57550	-0.441145	5.61796	0.000741551	0.0147701	DOWN		NO
AT3G57680	0.631513	2.67171	0.00152643	0.0262438	UP		NO
AT3G57740	-0.90986	0.276827	0.00309932	0.0455844	DOWN		NO
AT3G57770	-0.591569	3.23941	0.000886572	0.017034	DOWN		NO
AT3G57780	0.683045	3.59555	7.95903e-05	0.00229707	UP		NO
AT3G57880	-0.404874	4.99625	0.00043195	0.00945937	DOWN		NO
AT3G57930	-1.88274	4.29902	8.68771e-22	6.8049e-19	DOWN		NO
AT3G58070	2.34787	1.76585	7.65786e-18	3.48546e-15	UP		NO
AT3G58120	-1.20215	5.4878	1.06401e-16	3.77231e-14	DOWN		NO
AT3G58620	-0.871147	5.00503	5.73437e-11	8.25382e-09	DOWN		NO
AT3G58750	-0.610637	5.61526	2.35231e-07	1.41764e-05	DOWN		NO
AT3G58970	0.384383	5.19778	0.00212766	0.0340113	UP		NO
AT3G59080	-1.81804	3.52171	8.72227e-13	1.67871e-10	DOWN		NO
AT3G59110	-0.48055	5.53261	2.31972e-05	0.000806299	DOWN		NO
AT3G59340	1.67028	1.25818	8.5374e-07	4.54262e-05	UP		NO
AT3G59350	-0.989089	4.48522	5.41159e-07	3.03274e-05	DOWN		NO
AT3G59480	-1.00169	1.0574	9.69482e-05	0.0027098	DOWN		NO
AT3G59710	-0.889861	1.15067	0.00110637	0.0202961	DOWN		NO
AT3G59900	-0.955874	4.13386	1.4083e-05	0.0005247	DOWN		NO
AT3G59930	-2.30421	2.12977	7.34537e-17	2.66021e-14	DOWN		NO
AT3G59990	-0.294733	6.31407	0.00261191	0.0398422	DOWN		NO
AT3G60140	-1.49448	3.07397	9.26886e-06	0.000367276	DOWN		NO
AT3G60200	-0.807621	3.77027	9.94063e-07	5.14302e-05	DOWN		NO
AT3G60250	-0.321772	5.62719	0.00275313	0.0416569	DOWN		NO
AT3G60260	-0.799186	3.65627	3.37622e-06	0.000154085	DOWN		NO
AT3G60290	-0.926216	2.78037	2.66527e-05	0.000908382	DOWN		NO
AT3G60320	-0.522299	6.112	0.000183583	0.0046075	DOWN		NO
AT3G60530	-0.562088	6.9261	2.07574e-06	9.88866e-05	DOWN		NO
AT3G60690	0.757249	4.39944	6.638e-09	6.0754e-07	UP		NO
AT3G61150	-0.719499	4.9365	6.55361e-09	6.0145e-07	DOWN		NO
AT3G61220	0.33604	6.38426	0.00196011	0.0319084	UP		NO
AT3G61260	-0.412228	6.73738	0.000382852	0.00856232	DOWN		NO
AT3G61310	-0.97555	4.28568	3.19375e-07	1.87729e-05	DOWN		NO
AT3G61540	-0.461733	4.63661	0.000206861	0.0050819	DOWN		NO
AT3G61640	-0.566195	3.42911	0.000497082	0.0105963	DOWN		NO
AT3G61830	-0.516379	4.72876	0.000834369	0.0161975	DOWN		NO
AT3G61850	-0.496267	3.66653	0.00258185	0.0394551	DOWN		NO
AT3G61880	0.982905	3.06799	4.01759e-05	0.00129119	UP		NO
AT3G61890	0.700075	5.99394	0.000156541	0.00403711	UP		NO
AT3G62420	-0.893431	5.93285	1.28566e-10	1.71835e-08	DOWN		NO
AT3G62460	-0.737195	2.96797	4.23621e-05	0.00135113	DOWN		NO
AT3G62550	-0.439665	7.34898	0.00167095	0.0281396	DOWN		NO
AT3G62570	-1.81235	2.7977	9.05555e-15	2.34615e-12	DOWN		NO
AT3G62690	-0.671205	3.0548	0.000330701	0.0075771	DOWN		NO
AT3G62720	-1.8936	4.93594	8.19327e-29	1.31408e-25	DOWN		NO
AT3G62740	1.10022	0.876766	0.000480013	0.0103174	UP		NO
AT3G62860	-0.885102	4.27622	2.14999e-08	1.72414e-06	DOWN		NO
AT3G62950	-2.03298	3.21278	8.21483e-22	6.5877e-19	DOWN		NO
AT3G63010	-0.525194	3.805	0.000621978	0.0127737	DOWN		NO
AT3G63110	1.31306	3.81066	2.57903e-11	3.9846e-09	UP		NO
AT3G63210	0.432134	6.37305	0.00010669	0.00292625	UP		NO
AT3G63540	0.426929	6.64495	0.0020991	0.0336665	UP		NO
AT4G00150	-0.390206	4.94148	0.000488668	0.0104567	DOWN		NO
AT4G00165	0.603758	4.36613	4.29846e-06	0.000190495	UP		NO
AT4G00300	-0.568635	4.55289	2.19577e-05	0.000771919	DOWN		NO
AT4G00780	0.540982	7.1529	9.26608e-06	0.000367276	UP		NO
AT4G00950	-0.687466	3.35037	0.000250463	0.00596174	DOWN		NO
AT4G01026	-0.651659	4.91475	1.62286e-07	1.01597e-05	DOWN		NO
AT4G01070	0.68438	5.39759	4.4199e-06	0.000194852	UP		NO
AT4G01090	-0.635957	4.83333	4.71971e-08	3.42596e-06	DOWN		NO
AT4G01250	-1.35129	3.25915	2.98202e-12	5.28619e-10	DOWN		NO
AT4G01330	-0.668893	6.33947	7.93332e-09	7.05019e-07	DOWN		NO
AT4G01420	-5.69869	-2.36158	1.5013e-05	0.000554443	DOWN		NO
AT4G01525	1.5242	0.254198	0.000410343	0.00905003	UP		NO
AT4G01580	-0.785386	2.55952	0.00231366	0.036228	DOWN		NO
AT4G01670	-0.75746	2.91116	4.76111e-05	0.00148069	DOWN		YES	4:712350:C-T;protein_coding;sense;GGG>GGA;G>G
AT4G01870	-0.625733	6.76566	0.00295184	0.0438673	DOWN		NO
AT4G01950	-1.6382	5.28785	2.81084e-16	9.37346e-14	DOWN		NO
AT4G01980	3.14834	0.414385	3.88839e-06	0.000175652	UP		NO
AT4G01985	-1.49164	0.0431813	0.000964775	0.0182145	DOWN		NO
AT4G02170	-2.5485	-0.212916	7.12899e-10	8.23106e-08	DOWN		NO
AT4G02330	-1.38227	3.60955	7.78812e-09	6.93946e-07	DOWN		NO
AT4G02350	-0.585382	5.26402	1.26475e-06	6.39612e-05	DOWN		NO
AT4G02370	-0.372717	5.34861	0.00269794	0.0410042	DOWN		NO
AT4G02380	-0.411684	8.02608	0.000201577	0.00498847	DOWN		NO
AT4G02420	0.640963	3.29382	0.000475847	0.0102474	UP		NO
AT4G02520	-0.83904	7.70451	0.000365557	0.00822467	DOWN		NO
AT4G02540	-0.771847	5.60015	5.45302e-07	3.05088e-05	DOWN		NO
AT4G02700	-0.767498	2.51744	0.000407904	0.00901484	DOWN		NO
AT4G02715	0.328655	6.91934	0.00164519	0.0278015	UP		NO
AT4G02850	1.60627	0.590773	0.000237237	0.00570335	UP		NO
AT4G02890	0.468422	8.00356	7.77986e-06	0.000314944	UP		NO
AT4G02960	3.64864	-0.434909	5.60598e-17	2.09794e-14	UP		NO
AT4G02990	0.437461	5.12169	0.00213393	0.0340791	UP		NO
AT4G03060	1.98323	3.15703	4.33821e-09	4.11593e-07	UP		NO
AT4G03110	-0.425022	5.05296	0.000817122	0.015936	DOWN		NO
AT4G03140	-0.749689	2.11672	0.00220022	0.0349225	DOWN		NO
AT4G03190	-0.618672	5.20366	2.78464e-05	0.000936023	DOWN		NO
AT4G03210	-1.60367	6.06259	2.64361e-13	5.411e-11	DOWN		NO
AT4G03400	-0.833259	5.98632	3.64226e-07	2.1042e-05	DOWN		NO
AT4G03540	1.08751	0.502778	0.000810006	0.0158431	UP		NO
AT4G04020	0.452298	7.20546	0.00101075	0.0188813	UP		NO
AT4G04220	1.58497	1.08088	3.81287e-08	2.84748e-06	UP		NO
AT4G04223	1.07527	4.10652	6.18745e-08	4.37814e-06	UP		NO
AT4G04293	1.76273	3.61659	5.17333e-06	0.000223388	UP		NO
AT4G04330	-0.688281	4.50427	0.00127989	0.0228742	DOWN		NO
AT4G04440	-5.1646	-3.01236	0.00095583	0.018076	DOWN		NO
AT4G04450	-1.02714	0.869593	0.000832967	0.0161975	DOWN		NO
AT4G04570	-1.09719	3.98092	5.55999e-08	3.97592e-06	DOWN		NO
AT4G04653	5.60908	-2.97206	3.09307e-05	0.00102916	UP		NO
AT4G04750	0.551517	3.52285	0.000337064	0.00770717	UP		NO
AT4G04840	-0.826399	4.21518	3.49398e-06	0.000159243	DOWN		NO
AT4G05060	-0.352133	4.67208	0.00327144	0.0474732	DOWN		NO
AT4G05100	0.642539	2.70911	0.00198975	0.0322973	UP		NO
AT4G05110	0.720388	1.6673	0.00282173	0.0423713	UP		NO
AT4G07820	-1.24914	2.4263	5.06672e-06	0.000219913	DOWN		NO
AT4G07850	3.81166	-2.44252	0.00021437	0.00524564	UP		NO
AT4G07942	2.18688	-1.78942	0.000143035	0.00374617	UP		YES	4:4774294:T-C;exonic_variant,4:4780287:G-A;exonic_variant,4:4779843:T-C;exonic_variant,4:4779744:A-G;exonic_variant,4:4774343:G-C;exonic_variant,4:4778514:TCCG-T;exonic_variant,4:4778423:C-G;exonic_variant,4:4779729:A-T;exonic_variant,4:4779613:G-GA;exonic_variant,4:4774309:C-T;exonic_variant,4:4778348:C-T;exonic_variant,4:4778359:C-T;exonic_variant,4:4780001:A-C;exonic_variant,4:4778573:A-G;exon…
AT4G07995	1.24788	5.32023	1.48269e-11	2.41248e-09	UP		NO
AT4G08040	-2.15128	-0.284942	0.000205999	0.00506779	DOWN		NO
AT4G08109	-2.38705	-1.85581	3.54376e-05	0.00115929	DOWN		NO
AT4G08114	-2.54877	-2.46928	0.000952432	0.0180421	DOWN		YES	4:5073175:CG-C;exonic_variant
AT4G08115	-1.97985	0.354624	5.61387e-10	6.63441e-08	DOWN		NO
AT4G08300	1.95241	1.75377	1.47504e-15	4.43578e-13	UP		NO
AT4G08570	1.7229	1.4059	2.53554e-08	2.00424e-06	UP		NO
AT4G08850	-0.692494	6.38248	0.000152755	0.00396375	DOWN		YES	4:5637276:C-CTT;intronic_variant,4:5640794:T-A;exonic_variant
AT4G08930	-0.363089	4.95266	0.00167501	0.0281798	DOWN		NO
AT4G08950	-2.82804	7.38041	2.99683e-55	2.52341e-51	DOWN		NO
AT4G09350	0.665305	4.7769	6.37998e-06	0.000265745	UP		NO
AT4G09460	-0.593148	4.11325	3.32088e-05	0.00109765	DOWN		NO
AT4G10100	0.409113	4.47691	0.00225509	0.0354742	UP		NO
AT4G10610	-0.326206	6.19624	0.0016738	0.0281735	DOWN		NO
AT4G10910	-0.888551	2.58768	0.000929958	0.017706	DOWN		NO
AT4G10925	-0.611221	4.23789	5.99724e-06	0.000252491	DOWN		NO
AT4G11010	0.375082	6.84508	0.000851372	0.0164894	UP		NO
AT4G11110	-0.362469	5.78012	0.00109328	0.0201125	DOWN		YES	4:6772967:G-A;protein_coding;missense;GCT>ACT;A>T
AT4G11211	0.552589	4.62674	7.49161e-05	0.00218086	UP		NO
AT4G11320	0.637325	6.70246	0.00160244	0.0272999	UP		NO
AT4G11570	0.442518	7.57196	9.77529e-05	0.002721	UP		NO
AT4G11640	1.30693	2.97599	1.07783e-08	9.19049e-07	UP		YES	4:7022132:G-A;exonic_variant,4:7022132:G-A;protein_coding;sense;AGG>AGA;R>R,4:7022132:G-A;splice_donor_variant
AT4G11800	0.465997	5.47102	7.81615e-05	0.00225971	UP		NO
AT4G11810	1.47763	-0.789657	0.000389168	0.00866329	UP		NO
AT4G11900	0.708967	4.25064	5.97147e-06	0.000252143	UP		NO
AT4G12000	0.737294	2.91265	0.000230141	0.00557252	UP		NO
AT4G12290	-1.04974	3.67396	9.40795e-06	0.000371912	DOWN		YES	4:7304255:AC-A;exonic_variant,4:7304330:CG-C;exonic_variant,4:7304279:AT-A;exonic_variant
AT4G12320	1.27995	5.75113	7.4268e-17	2.66108e-14	UP		NO
AT4G12420	-0.515516	7.19111	7.40732e-06	0.000301312	DOWN		NO
AT4G12480	-1.43274	6.06869	4.92608e-12	8.59665e-10	DOWN		NO
AT4G12520	0.481508	4.35285	0.00167766	0.0282095	UP		NO
AT4G12550	1.34262	2.2433	3.2265e-05	0.0010696	UP		NO
AT4G12690	-0.708139	3.45882	7.89264e-06	0.000318743	DOWN		NO
AT4G12720	-0.439958	4.76848	0.00122084	0.0220359	DOWN		NO
AT4G12880	0.520428	5.72669	9.49458e-05	0.00266267	UP		NO
AT4G12917	0.557504	3.40696	0.00248039	0.0383045	UP		NO
AT4G12980	-0.581164	6.04989	0.000136028	0.00359619	DOWN		NO
AT4G13340	-1.80535	6.45961	1.00501e-19	5.6416e-17	DOWN		NO
AT4G13420	-1.20715	2.98809	0.00033562	0.00768457	DOWN		NO
AT4G13450	-2.24848	-2.23516	0.00145044	0.0251498	DOWN		NO
AT4G13510	-0.619801	5.39118	0.000154863	0.0040061	DOWN		NO
AT4G13540	-1.02746	3.47314	1.50227e-09	1.60628e-07	DOWN		NO
AT4G13575	-0.734599	5.39312	0.000119399	0.00321976	DOWN		YES	4:7893517:G-A;intronic_variant,4:7892680:AAT-A;intronic_variant
AT4G13770	0.852977	7.11499	1.09521e-08	9.29167e-07	UP		NO
AT4G13800	0.663712	4.00708	0.000841869	0.0163241	UP		NO
AT4G13810	1.10309	4.62258	1.27468e-14	3.18019e-12	UP		NO
AT4G13860	0.946991	2.07822	0.000754869	0.0149822	UP		NO
AT4G13900	1.49255	3.97546	2.08926e-13	4.39802e-11	UP		YES	4:8036782:C-A;exonic_variant
AT4G14030	-0.467268	8.07737	0.000227336	0.00551254	DOWN		NO
AT4G14130	-2.10896	5.53275	5.9279e-35	1.42613e-31	DOWN		NO
AT4G14245	-1.84462	-2.13755	0.00248293	0.0383262	DOWN		YES	4:8210085:T-TC;exonic_variant
AT4G14270	-0.36015	7.36762	0.000814264	0.0158987	DOWN		NO
AT4G14400	3.70277	3.91543	1.49711e-18	7.52597e-16	UP		NO
AT4G14430	-0.453392	5.42539	2.17507e-05	0.000766703	DOWN		NO
AT4G14500	-0.450428	6.14351	6.72746e-05	0.00198761	DOWN		NO
AT4G14540	0.465673	5.06314	0.00017002	0.00432185	UP		NO
AT4G14580	-0.531416	4.0251	0.00276146	0.0417453	DOWN		NO
AT4G14780	-1.42682	0.0432574	0.0002605	0.00616398	DOWN		NO
AT4G14930	-0.593943	6.23637	8.55338e-08	5.8142e-06	DOWN		YES	4:8539695:G-GT;intronic_variant
AT4G15090	0.429043	5.02335	0.000327508	0.00751416	UP		NO
AT4G15096	4.4686	-0.68968	7.28582e-17	2.66021e-14	UP		NO
AT4G15236	-1.2957	0.695232	0.000191051	0.00476651	DOWN		YES	4:8699123:T-A;protein_coding;missense;TTG>ATG;L>M,4:8699123:T-A;exonic_variant
AT4G15248	2.76296	1.95666	5.31475e-11	7.68267e-09	UP		NO
AT4G15260	-0.499467	4.90381	1.62657e-05	0.000594838	DOWN		NO
AT4G15390	1.3323	5.35348	1.83712e-13	3.89158e-11	UP		YES	4:8793191:G-A;protein_coding;missense;ACT>ATT;T>I
AT4G15393	1.13969	0.932732	0.00135689	0.0239524	UP		YES	4:8806472:G-A;intronic_variant,4:8806472:G-A;exonic_variant,4:8806472:G-A;protein_coding;sense;ACG>ACA;T>T
AT4G15490	0.464136	5.52313	0.00180842	0.0298429	UP		NO
AT4G15610	-0.728165	5.78674	1.03289e-05	0.000399869	DOWN		NO
AT4G15660	-0.866332	2.23813	0.000301231	0.0070019	DOWN		NO
AT4G15670	-1.07635	1.67779	2.84687e-05	0.000952189	DOWN		NO
AT4G15680	-0.716472	1.57164	0.00206598	0.0333098	DOWN		NO
AT4G15690	-0.803479	3.11493	7.50362e-05	0.00218247	DOWN		NO
AT4G15700	-0.987038	3.10146	0.000101422	0.00280228	DOWN		NO
AT4G15760	-1.19005	6.55655	1.98763e-09	2.06622e-07	DOWN		YES	4:8974718:CT-C;exonic_variant,4:8974704:CT-C;exonic_variant,4:8974534:TC-T;exonic_variant&protein_coding
AT4G15800	-0.816176	4.58223	6.92345e-08	4.86824e-06	DOWN		YES	4:8985692:TG-T;exonic_variant,4:8985631:AT-A;exonic_variant,4:8985599:TTG-T;exonic_variant,4:8985758:TG-T;exonic_variant,4:8985638:CG-C;exonic_variant,4:8985806:GT-G;exonic_variant,4:8985723:AT-A;exonic_variant
AT4G15920	0.457134	5.06762	0.000808708	0.0158269	UP		YES	4:9032131:G-A;intronic_variant,4:9032478:A-T;exonic_variant,4:9032478:A-T;protein_coding;missense;GAT>GAA;D>E,4:9032473:T-A;protein_coding;missense;GAA>GTA;E>V,4:9032473:T-A;exonic_variant,4:9032479:T-A;protein_coding;missense;GAT>GTT;D>V,4:9032479:T-A;exonic_variant
AT4G15990	-0.992032	1.56388	2.54688e-05	0.00087443	DOWN		NO
AT4G16160	-2.59989	-1.65193	0.000119059	0.00321315	DOWN		NO
AT4G16162	-2.25559	-1.0806	5.04556e-05	0.00154772	DOWN		NO
AT4G16480	-0.451735	4.3357	0.00323119	0.0471109	DOWN		NO
AT4G16490	0.40673	6.69057	3.49882e-05	0.00114728	UP		NO
AT4G16500	-0.429111	5.19597	0.000744629	0.0148051	DOWN		NO
AT4G16563	-0.649354	4.22386	0.000145166	0.00379606	DOWN		NO
AT4G16670	0.729197	3.25652	7.59504e-05	0.00220715	UP		NO
AT4G16750	0.666155	2.23938	0.00144533	0.0251318	UP		NO
AT4G16770	0.799277	3.95634	1.4031e-08	1.17557e-06	UP		YES	4:9435239:CA-C;intronic_variant,4:9436020:TA-T;intronic_variant,4:9435219:C-A;intronic_variant,4:9435178:AC-A;intronic_variant,4:9435223:GC-G;intronic_variant,4:9435215:TC-T;intronic_variant,4:9435248:TA-T;intronic_variant,4:9434051:AC-A;exonic_variant,4:9435187:TA-T;intronic_variant,4:9435191:A-G;intronic_variant,4:9435193:T-C;intronic_variant,4:9434256:G-GC;exonic_variant,4:9436245:G-GT;introni…
AT4G16857	-1.20758	3.2533	7.73899e-10	8.83583e-08	DOWN		NO
AT4G16860	-0.567875	7.31713	1.6611e-05	0.000605492	DOWN		NO
AT4G16870	-1.53662	6.75679	1.32808e-31	2.23655e-28	DOWN		NO
AT4G16880	0.694	5.26234	1.50537e-07	9.53055e-06	UP		NO
AT4G16910	-1.80272	0.890533	3.74427e-09	3.61349e-07	DOWN		NO
AT4G16950	-0.387141	8.18396	0.000743358	0.0147886	DOWN		NO
AT4G17030	-0.869812	3.17851	0.00273141	0.041384	DOWN		NO
AT4G17090	0.892516	5.98083	1.46656e-07	9.31987e-06	UP		NO
AT4G17098	1.02184	2.069	1.81514e-06	8.80917e-05	UP		YES	4:9609626:GT-G;intronic_variant,4:9610634:CT-C;exonic_variant
AT4G17230	-0.84399	5.04724	5.51749e-10	6.54347e-08	DOWN		YES	4:9660901:A-AT;exonic_variant,4:9660907:C-CT;exonic_variant,4:9661411:A-T;protein_coding;missense;ATA>AAA;I>K
AT4G17250	-0.603178	4.58503	2.54499e-05	0.00087443	DOWN		NO
AT4G17460	-1.04452	5.24174	4.44772e-08	3.2425e-06	DOWN		NO
AT4G17490	-1.59122	3.13983	9.60279e-06	0.000378283	DOWN		NO
AT4G17500	-1.4498	5.33371	5.80361e-08	4.11519e-06	DOWN		NO
AT4G17670	1.37544	2.37678	4.62075e-07	2.62006e-05	UP		NO
AT4G17810	-0.547931	3.24016	0.00337556	0.048628	DOWN		NO
AT4G17870	-0.46602	5.53636	0.000135325	0.00358058	DOWN		NO
AT4G17880	0.432903	4.51825	0.000976035	0.0183755	UP		NO
AT4G18010	-0.671792	5.2011	0.000189119	0.0047253	DOWN		YES	4:9991169:CT-C;exonic_variant,4:9991520:G-C;protein_coding;missense;CCG>CGG;P>R,4:9991521:G-C;protein_coding;missense;CCG>GCG;P>A
AT4G18170	-0.988905	2.25361	0.000502921	0.0106932	DOWN		NO
AT4G18220	0.734663	3.89258	1.50648e-06	7.48375e-05	UP		NO
AT4G18340	-1.29653	2.63933	4.43716e-11	6.46961e-09	DOWN		NO
AT4G18490	-0.732073	1.71248	0.000739905	0.014746	DOWN		NO
AT4G18760	-0.851783	4.00824	1.85961e-09	1.9512e-07	DOWN		YES	4:10307906:C-CT;exonic_variant
AT4G18780	-0.758673	3.21263	0.000214461	0.00524564	DOWN		NO
AT4G18890	-0.75958	2.73083	0.00034424	0.00781585	DOWN		YES	4:10353254:G-A;intronic_variant,4:10353254:G-A;exonic_variant
AT4G18950	-0.844305	5.34052	9.54932e-09	8.31087e-07	DOWN		NO
AT4G18970	-0.366494	6.83206	0.00103342	0.0192196	DOWN		NO
AT4G18975	0.35042	4.84506	0.00299072	0.044305	UP		NO
AT4G19030	0.848188	3.43929	0.000279359	0.00655685	UP		NO
AT4G19160	-0.89761	8.10197	1.16277e-15	3.5603e-13	DOWN		NO
AT4G19170	0.754444	8.50332	5.5259e-09	5.15561e-07	UP		NO
AT4G19190	-0.349108	4.93382	0.00184286	0.0303221	DOWN		NO
AT4G19410	-0.410678	5.97565	0.000205154	0.00505471	DOWN		YES	4:10584545:CAT-C;intronic_variant&splice_acceptor_region_variant
AT4G19420	-0.903582	7.15148	5.95332e-11	8.5325e-09	DOWN		YES	4:10592973:G-A;intronic_variant,4:10591310:G-A;intronic_variant,4:10591310:G-A;exonic_variant
AT4G19720	1.10291	-0.309651	0.00164519	0.0278015	UP		NO
AT4G19830	0.478542	3.91812	0.00107845	0.019944	UP		YES	4:10773855:G-A;protein_coding;missense;CTC>TTC;L>F
AT4G19950	0.688085	2.09799	0.000571248	0.0118914	UP		NO
AT4G20010	0.377532	5.02367	0.00100077	0.0187574	UP		NO
AT4G20170	-0.463579	4.75288	0.000177397	0.00448126	DOWN		NO
AT4G20860	-0.866346	5.7886	3.08847e-05	0.00102891	DOWN		NO
AT4G21210	0.359998	6.6426	0.00153866	0.0263996	UP		NO
AT4G21326	0.575452	3.47481	0.00138125	0.0242555	UP		YES	4:11346685:AT-A;exonic_variant,4:11348751:TC-T;intronic_variant
AT4G21534	-0.648424	3.53281	8.32037e-05	0.00239235	DOWN		YES	4:11458326:A-G;intronic_variant
AT4G21670	0.328664	5.11387	0.00296347	0.0439898	UP		YES	4:11515638:ATCTGTTTAGT-A;intronic_variant,4:11515625:A-ATC;intronic_variant,4:11515636:C-A;intronic_variant,4:11515635:C-A;intronic_variant,4:11515628:TTTTC-T;intronic_variant,4:11515624:C-CGGTGGTCGCCGT;intronic_variant
AT4G21740	-0.663676	3.14465	0.000245983	0.00588715	DOWN		NO
AT4G21760	3.21421	0.92867	5.55365e-17	2.09794e-14	UP		NO
AT4G21870	-1.25416	3.60988	4.6923e-08	3.41342e-06	DOWN		NO
AT4G21930	1.40559	2.69225	2.24761e-07	1.36646e-05	UP		NO
AT4G21960	0.3917	10.1524	0.000312472	0.00720353	UP		NO
AT4G22010	-0.444605	5.55096	0.00279708	0.0421515	DOWN		NO
AT4G22050	0.992865	1.09524	0.00220494	0.034948	UP		NO
AT4G22200	0.929674	5.75024	2.12283e-10	2.72897e-08	UP		YES	4:11750324:CA-C;exonic_variant,4:11750389:A-T;exonic_variant,4:11750381:G-T;exonic_variant,4:11750392:C-T;exonic_variant,4:11750318:A-G;exonic_variant,4:11750311:AC-A;exonic_variant,4:11750395:T-TAGAGAAAGGTAAGCTGAGTA;exonic_variant,4:11750383:G-C;exonic_variant
AT4G22470	-1.93825	1.31335	2.32748e-05	0.000808162	DOWN		NO
AT4G22570	0.595617	5.41757	5.64465e-07	3.13725e-05	UP		NO
AT4G22820	0.354476	5.40861	0.00209171	0.0336266	UP		NO
AT4G22920	0.409492	4.95933	0.000973418	0.0183365	UP		NO
AT4G23020	0.875311	3.04023	3.33717e-05	0.0010998	UP		NO
AT4G23030	-0.811958	1.68016	0.000490627	0.0104853	DOWN		NO
AT4G23060	-1.03502	4.66377	1.40918e-09	1.52613e-07	DOWN		YES	4:12087278:C-T;exonic_variant,4:12087281:C-T;exonic_variant,4:12087266:CA-C;exonic_variant,4:12087272:C-CT;exonic_variant,4:12087271:T-TAA;exonic_variant,4:12087294:G-T;protein_coding;sense;GCG>GCT;A>A,4:12087262:GTA-G;exonic_variant
AT4G23180	-1.17077	5.57463	1.10753e-08	9.37255e-07	DOWN		NO
AT4G23200	-2.55827	-1.25007	0.000203827	0.0050284	DOWN		NO
AT4G23270	-0.540267	5.47004	0.000121505	0.0032687	DOWN		NO
AT4G23290	0.545912	5.24352	0.000503533	0.0106932	UP		NO
AT4G23540	-0.504758	3.79439	0.00144853	0.0251498	DOWN		YES	4:12280620:G-A;protein_coding;missense;GCT>GTT;A>V
AT4G23550	-0.759178	1.72882	0.000601927	0.0124377	DOWN		NO
AT4G23570	-0.422356	4.85701	0.00208062	0.0335138	DOWN		NO
AT4G23600	1.3265	4.66894	0.000118282	0.00319762	UP		NO
AT4G23640	0.319451	5.74885	0.00260952	0.0398238	UP		NO
AT4G23670	0.53893	10.3778	4.00272e-07	2.29278e-05	UP		NO
AT4G23680	0.589996	7.20862	7.05281e-06	0.000288985	UP		NO
AT4G23700	-0.847015	4.97087	1.67095e-07	1.04414e-05	DOWN		NO
AT4G23730	0.469697	5.2724	1.69425e-05	0.000616907	UP		NO
AT4G23750	-0.942179	4.0142	5.18324e-06	0.00022353	DOWN		NO
AT4G23890	0.434773	7.16557	2.61147e-05	0.000891154	UP		NO
AT4G23900	1.30871	0.711269	2.19789e-05	0.000771919	UP		NO
AT4G24040	-1.02401	3.44198	2.05564e-08	1.66034e-06	DOWN		NO
AT4G24050	-0.632868	3.90647	1.21324e-05	0.000459138	DOWN		NO
AT4G24150	-0.872115	1.12871	0.00236018	0.0367514	DOWN		YES	4:12537113:A-AAG;intronic_variant
AT4G24230	-1.56845	6.3642	5.1198e-23	4.66054e-20	DOWN		NO
AT4G24240	-0.878643	4.50902	1.0687e-10	1.45141e-08	DOWN		NO
AT4G24275	-1.26402	3.98514	6.69206e-14	1.55445e-11	DOWN		NO
AT4G24340	1.24837	0.789206	0.00209154	0.0336266	UP		NO
AT4G24430	-0.971405	0.401084	0.00237456	0.0369582	DOWN		NO
AT4G24450	0.872366	4.80923	4.38859e-10	5.35551e-08	UP		NO
AT4G24460	0.542025	4.08203	0.000183365	0.00460547	UP		NO
AT4G24570	-1.52629	3.506	0.000357179	0.00807392	DOWN		NO
AT4G24700	1.13393	3.09818	2.69091e-06	0.000125356	UP		NO
AT4G24780	0.640772	6.10214	4.85664e-07	2.73998e-05	UP		NO
AT4G24800	-0.408324	7.09149	2.08286e-05	0.000741573	DOWN		NO
AT4G24805	-0.870404	3.7262	6.68622e-09	6.10294e-07	DOWN		NO
AT4G25020	-1.02873	0.881843	0.000783911	0.0154223	DOWN	YES	NO
AT4G25100	0.909184	8.9342	2.87785e-07	1.70128e-05	UP		NO
AT4G25170	-0.740207	6.90303	1.79807e-11	2.87018e-09	DOWN		NO
AT4G25434	-1.02208	0.92581	0.000517914	0.010966	DOWN		NO
AT4G25480	1.50611	0.766383	0.00029475	0.00687022	UP		NO
AT4G25580	-2.98368	3.37889	1.0694e-41	3.27441e-38	DOWN		YES	4:13057847:G-A;protein_coding;missense;AGC>AAC;S>N
AT4G25750	-1.90569	0.501518	1.79825e-06	8.7398e-05	DOWN		NO
AT4G25810	-1.13813	3.61941	3.91727e-05	0.00126295	DOWN		NO
AT4G25835	-1.06706	4.05784	1.12481e-13	2.46006e-11	DOWN		NO
AT4G25970	-0.382853	6.08438	0.000357504	0.00807585	DOWN		NO
AT4G25990	-0.723123	2.61648	0.00114828	0.0208942	DOWN		NO
AT4G26288	-1.30808	3.51373	3.10532e-06	0.000143274	DOWN		NO
AT4G26542	0.676111	2.00112	0.00333081	0.0481687	UP		NO
AT4G26610	-0.45915	5.12476	5.9025e-05	0.0017687	DOWN		NO
AT4G26690	-0.534235	6.25382	2.06271e-05	0.000735953	DOWN		NO
AT4G26790	0.917094	2.35635	1.03576e-05	0.000400523	UP		NO
AT4G26850	0.582346	8.60928	4.71041e-06	0.000206309	UP		NO
AT4G26960	0.895877	0.911816	0.0019326	0.0315368	UP		NO
AT4G27070	-1.2838	2.98289	2.34933e-11	3.66332e-09	DOWN		YES	4:13587793:G-A;protein_coding;stop-gain;TGG>TGA;W>*
AT4G27100	-0.449562	4.05804	0.00199622	0.0323866	DOWN		NO
AT4G27260	-0.83441	6.11837	1.18698e-06	6.03909e-05	DOWN		NO
AT4G27280	-1.86113	5.29967	6.04812e-09	5.56576e-07	DOWN		NO
AT4G27430	-0.389572	6.81735	6.4963e-05	0.001921	DOWN		NO
AT4G27440	-0.490378	9.26469	7.85432e-06	0.000317576	DOWN		NO
AT4G27450	-0.838809	7.963	1.63633e-10	2.14448e-08	DOWN		NO
AT4G27460	-1.03728	2.09184	6.21466e-07	3.40905e-05	DOWN		NO
AT4G27560	0.98008	3.34461	2.7316e-06	0.000126552	UP		NO
AT4G27730	-0.931627	3.38987	1.31342e-07	8.4584e-06	DOWN		NO
AT4G27820	0.38483	5.31697	0.00091554	0.017471	UP		NO
AT4G28040	-0.67851	6.3062	3.121e-09	3.07364e-07	DOWN		NO
AT4G28180	-0.982081	2.28689	0.000364593	0.00820846	DOWN		NO
AT4G28190	-0.846526	2.89948	0.000124201	0.00332917	DOWN		NO
AT4G28240	0.629453	6.55053	4.16499e-05	0.0013322	UP		NO
AT4G28260	-0.382098	6.60794	0.000203144	0.00501989	DOWN		NO
AT4G28310	0.801926	2.36984	0.0011258	0.0205741	UP		NO
AT4G28703	-1.01795	2.54191	1.4867e-05	0.000549653	DOWN		NO
AT4G28760	-0.31919	6.30588	0.00225373	0.0354742	DOWN		YES	4:14207708:G-A;exonic_variant
AT4G28790	0.997581	1.78245	5.58555e-05	0.00168724	UP		NO
AT4G29110	1.02423	2.41039	1.71256e-06	8.35951e-05	UP		NO
AT4G29270	0.698198	4.09906	6.59834e-06	0.000272018	UP		NO
AT4G29310	-1.09521	4.24317	3.62905e-10	4.46094e-08	DOWN		NO
AT4G29370	-3.30908	-0.371888	8.32467e-05	0.00239235	DOWN		NO
AT4G29550	1.55444	-0.601527	0.000625983	0.0128403	UP		NO
AT4G29780	-1.97934	3.71821	1.01302e-08	8.72625e-07	DOWN		NO
AT4G29900	-0.3374	6.4206	0.00227806	0.035737	DOWN		NO
AT4G29950	-0.599035	6.59183	4.79666e-07	2.71068e-05	DOWN		NO
AT4G29990	0.86251	3.07056	1.71017e-05	0.000620025	UP		NO
AT4G30140	-1.51553	4.90155	0.00182101	0.0300212	DOWN		NO
AT4G30270	-1.06788	7.42707	1.1071e-06	5.65832e-05	DOWN		NO
AT4G30280	-0.8237	4.79086	4.59924e-06	0.000201702	DOWN		YES	4:14827204:G-T;exonic_variant
AT4G30290	-1.29803	6.37982	5.9006e-10	6.94888e-08	DOWN		NO
AT4G30440	-0.729115	6.84121	4.68534e-09	4.40802e-07	DOWN		NO
AT4G30450	-0.538763	3.93751	0.003239	0.047165	DOWN		NO
AT4G30690	-0.326428	6.40456	0.00175322	0.029175	DOWN		NO
AT4G30960	0.388291	9.44907	0.0011925	0.0215939	UP		NO
AT4G31180	-0.422751	6.64376	3.49043e-05	0.00114582	DOWN		NO
AT4G31370	1.75001	-1.65015	0.00203619	0.0329241	UP		NO
AT4G31405	-0.769433	1.44151	0.00204353	0.0330111	DOWN		NO
AT4G31430	-0.359459	5.50892	0.00144463	0.0251318	DOWN		NO
AT4G31550	-0.497052	5.31702	0.000462719	0.0100224	DOWN		NO
AT4G31800	-1.96132	3.13573	3.61754e-08	2.72578e-06	DOWN		NO
AT4G31877	-0.924858	3.74012	5.15811e-06	0.000223017	DOWN		NO
AT4G32295	0.780082	2.65478	0.000898707	0.0172181	UP		NO
AT4G32300	-0.491393	5.14052	0.000105986	0.00290931	DOWN		NO
AT4G32480	-0.7281	6.38591	5.46515e-05	0.00165681	DOWN		NO
AT4G32510	1.80695	-1.08463	5.34079e-05	0.0016279	UP		NO
AT4G32600	0.435511	5.43166	6.08225e-05	0.0018134	UP		NO
AT4G32790	-0.667427	3.30022	0.000405771	0.00897948	DOWN		NO
AT4G32800	-1.99411	1.00227	3.30861e-06	0.000151615	DOWN		NO
AT4G32870	0.814787	2.49115	0.000873517	0.016812	UP		NO
AT4G32980	0.677701	6.11399	7.01638e-09	6.31868e-07	UP		NO
AT4G33050	-0.774178	4.88699	0.00293551	0.0436973	DOWN		NO
AT4G33070	1.19104	3.90146	0.000137695	0.00363457	UP		NO
AT4G33220	0.420379	5.93057	0.000390102	0.00867836	UP		YES	4:16023375:GT-G;exonic_variant,4:16023375:GT-G;intronic_variant
AT4G33300	-0.42892	5.99927	0.0034513	0.0495496	DOWN		YES	4:16055028:T-TA;intronic_variant
AT4G33467	-1.05254	1.23195	0.000131438	0.00349957	DOWN		NO
AT4G33490	0.894212	3.7088	1.08315e-08	9.2125e-07	UP		NO
AT4G33550	-0.786309	5.24447	0.000498009	0.0106027	DOWN		YES	4:16134421:T-TA;exonic_variant
AT4G33560	1.41543	2.35283	7.22332e-07	3.94291e-05	UP		NO
AT4G33650	-0.328751	5.35773	0.00323448	0.0471196	DOWN		NO
AT4G33920	-0.624236	4.95498	2.59839e-05	0.000888918	DOWN		NO
AT4G34020	-0.505602	5.46043	2.71594e-06	0.000125999	DOWN		NO
AT4G34030	-0.52801	6.61755	4.93935e-07	2.78198e-05	DOWN		NO
AT4G34138	-0.725415	6.11918	1.11237e-05	0.000427205	DOWN		NO
AT4G34150	-0.747238	5.98922	1.1801e-05	0.000449624	DOWN		NO
AT4G34260	-0.368502	6.3163	0.000503195	0.0106932	DOWN		NO
AT4G34390	-0.48644	4.96769	0.00220743	0.0349546	DOWN		NO
AT4G34410	-5.59366	-1.41389	1.18477e-05	0.000450896	DOWN		NO
AT4G34550	1.58248	0.318404	8.56223e-08	5.8142e-06	UP		NO
AT4G34580	-1.39571	3.63669	2.71916e-07	1.62383e-05	DOWN		YES	4:16515772:C-T;splice_donor_region_variant&protein_coding;sense;CG>TG;>
AT4G34610	0.520641	5.10753	0.000450544	0.00978578	UP		NO
AT4G34630	0.635903	4.96282	4.09895e-06	0.000183616	UP		NO
AT4G34710	0.438723	8.69575	0.00286827	0.0429743	UP		NO
AT4G34760	-0.645162	4.54448	0.00103416	0.0192226	DOWN		NO
AT4G34770	-1.1801	2.46103	5.98148e-06	0.000252143	DOWN		NO
AT4G34860	-0.491135	4.97714	0.00014726	0.00384486	DOWN		NO
AT4G34920	0.446691	5.88417	0.000113103	0.00307459	UP		NO
AT4G34970	-0.815014	3.48735	1.87602e-06	9.05248e-05	DOWN		NO
AT4G34980	0.373046	6.28787	0.000301033	0.0070019	UP		NO
AT4G35100	-0.514535	8.79036	0.000112507	0.00306086	DOWN		NO
AT4G35190	-1.24283	1.771	5.14225e-06	0.000222617	DOWN		NO
AT4G35240	-0.40853	4.39337	0.00209262	0.0336266	DOWN		NO
AT4G35270	0.783278	4.62168	3.38063e-08	2.55503e-06	UP		NO
AT4G35290	0.562569	3.39411	0.00289704	0.0432552	UP		NO
AT4G35320	-1.01239	3.74411	8.04654e-08	5.51966e-06	DOWN		NO
AT4G35470	-0.707308	6.07023	3.16951e-11	4.7871e-09	DOWN		YES	4:16846651:G-A;protein_coding;missense;GGT>AGT;G>S
AT4G35480	-0.779872	2.13195	0.000546721	0.0114302	DOWN		NO
AT4G35750	-0.674562	8.00211	1.46591e-07	9.31987e-06	DOWN		NO
AT4G35770	-1.18053	8.11987	1.05747e-13	2.34319e-11	DOWN		NO
AT4G36110	-1.0785	1.25878	0.00155342	0.0266128	DOWN		NO
AT4G36240	0.833006	2.41869	2.76685e-05	0.000930971	UP		NO
AT4G36280	1.04647	1.72519	0.00137283	0.0241832	UP		NO
AT4G36410	-1.59789	3.68515	1.1472e-18	5.94442e-16	DOWN		NO
AT4G36450	-1.0261	0.769433	7.72197e-05	0.00223632	DOWN		NO
AT4G36670	-2.43904	4.91702	3.33871e-23	3.30739e-20	DOWN		NO
AT4G36850	-1.39536	7.78303	7.95234e-20	4.53971e-17	DOWN		YES	4:17354711:GA-G;intronic_variant,4:17353918:GA-G;splice_acceptor_region_variant
AT4G36930	-1.04021	3.43322	7.87931e-07	4.22584e-05	DOWN		NO
AT4G36970	-0.513522	4.97373	3.99402e-05	0.00128607	DOWN		NO
AT4G37180	-0.391613	6.56116	0.000120701	0.00324967	DOWN		NO
AT4G37220	-1.79411	1.82384	5.5944e-14	1.32694e-11	DOWN		NO
AT4G37240	-1.25039	1.3957	2.71916e-07	1.62383e-05	DOWN		NO
AT4G37250	-0.764365	4.89093	1.13593e-08	9.58878e-07	DOWN		NO
AT4G37260	-2.02996	5.60045	2.18648e-34	4.33194e-31	DOWN		NO
AT4G37320	0.43565	4.07917	0.00240696	0.0373297	UP		NO
AT4G37410	0.740569	6.93584	3.32427e-06	0.000152126	UP		NO
AT4G37450	-0.722732	3.84425	0.000149374	0.003891	DOWN		NO
AT4G37540	-0.380475	5.83055	0.00112157	0.0205256	DOWN		NO
AT4G37580	-0.787732	2.97893	0.000169274	0.00430938	DOWN		NO
AT4G37590	-0.407306	6.63306	4.3703e-05	0.00138733	DOWN		NO
AT4G37850	1.32273	-0.756164	0.00321455	0.0469104	UP		NO
AT4G37870	-0.412496	7.89684	0.000280854	0.00658736	DOWN		NO
AT4G37980	0.438989	6.90018	0.000159887	0.00411316	UP		NO
AT4G38080	0.466191	4.52791	0.000926068	0.0176519	UP		NO
AT4G38400	-0.897735	1.66557	0.000718506	0.014403	DOWN		NO
AT4G38470	-1.06012	6.56063	1.70782e-11	2.73909e-09	DOWN		NO
AT4G38550	-0.601314	5.87293	0.00341986	0.049182	DOWN		NO
AT4G38620	0.934413	3.47405	1.4522e-08	1.21068e-06	UP		NO
AT4G38770	0.376207	8.88284	0.00109718	0.0201604	UP		NO
AT4G38860	0.503146	5.65446	7.32237e-06	0.000298577	UP		NO
AT4G38900	-0.340746	5.28691	0.00155469	0.0266211	DOWN		NO
AT4G38960	0.64977	3.78457	0.000861185	0.0166412	UP		NO
AT4G38970	0.363873	11.1368	0.000309006	0.00713828	UP		YES	4:18163993:C-CA;intronic_variant,4:18164257:GATACCTGTGGGTAAAAGTTTCCTTAGTGATTTTTCAGACATTATAAGTTGTATTAAGAGAAGCACTTTATAACGAAT-G;intronic_variant,4:18163995:G-GATTCCGGGGACTGCGGGAGGGACTCTGTTGCGGAGGAGCTTGAGGGTGTAGGCGGCAACTTGTT;intronic_variant&splice_acceptor_region_variant,4:18163995:G-GATTCCGGGGACTGCGGGAGGGACTCTGTTGCGGAGGAGCTTGAGGGTGTAGGCGGCAACTTGTT;intronic_variant,4:18163993:C-CA;splice_acceptor_va…
AT4G39070	-1.78488	0.431439	4.64618e-05	0.0014557	DOWN		NO
AT4G39210	0.563072	5.14001	0.000810958	0.0158474	UP		NO
AT4G39480	0.720741	2.15004	0.000444415	0.00968198	UP		NO
AT4G39550	-1.01721	1.72964	0.000306794	0.0071018	DOWN		NO
AT4G39730	0.404839	6.53063	0.000528505	0.0111463	UP		NO
AT4G39900	-0.553846	5.32921	0.000215978	0.00527128	DOWN		NO
AT4G39955	-0.429743	4.23875	0.00240969	0.0373496	DOWN		NO
AT5G01200	-1.04268	1.65493	5.38391e-05	0.00163808	DOWN		NO
AT5G01210	-0.638564	6.74254	0.000186133	0.00465416	DOWN		NO
AT5G01710	-0.378984	5.8233	0.00280104	0.0421922	DOWN		NO
AT5G01790	0.929004	2.65445	5.02848e-05	0.00154529	UP		NO
AT5G01810	-0.843506	5.74099	1.19144e-09	1.3114e-07	DOWN		NO
AT5G01820	0.669427	6.53979	8.31656e-09	7.33795e-07	UP		NO
AT5G02010	-0.887156	3.94399	2.93734e-09	2.90979e-07	DOWN		NO
AT5G02020	-0.724848	7.33282	1.48726e-09	1.5953e-07	DOWN		NO
AT5G02030	-0.529959	3.98914	0.00176862	0.0293588	DOWN		NO
AT5G02160	-0.419455	8.33864	0.000392656	0.0087179	DOWN		NO
AT5G02230	0.750314	5.80596	2.19327e-09	2.23177e-07	UP		NO
AT5G02290	-0.629313	5.09181	6.19653e-06	0.00025894	DOWN		NO
AT5G02440	-0.69984	2.61994	0.00254381	0.0390156	DOWN		NO
AT5G02620	0.389201	5.24534	0.000852047	0.016493	UP		NO
AT5G02760	-0.907579	7.22109	5.26237e-10	6.33006e-08	DOWN		NO
AT5G02810	-0.486867	7.78298	4.4001e-06	0.000194233	DOWN		YES	5:640189:C-T;protein_coding;missense;CGA>CAA;R>Q,5:640189:C-T;intronic_variant,5:640189:C-T;exonic_variant
AT5G02830	0.407281	6.0812	0.00214323	0.0341952	UP		NO
AT5G03040	-0.393954	6.95136	0.000181158	0.00455682	DOWN		NO
AT5G03090	4.45082	-1.93132	1.4739e-09	1.58602e-07	UP		NO
AT5G03120	-0.902528	2.81049	9.69361e-06	0.000381414	DOWN		NO
AT5G03204	-4.83818	-2.09773	4.00168e-05	0.0012873	DOWN		NO
AT5G03320	-0.519963	4.87425	4.80932e-05	0.00149431	DOWN		NO
AT5G03355	-2.08752	1.48211	1.53105e-10	2.01434e-08	DOWN		NO
AT5G03470	-0.646669	4.83284	3.79662e-06	0.000171873	DOWN		NO
AT5G03555	0.745309	5.4892	1.42749e-06	7.14401e-05	UP		NO
AT5G03610	-0.49697	4.471	0.000620116	0.0127432	DOWN		NO
AT5G03720	-1.0675	1.33679	0.000265731	0.00627635	DOWN		NO
AT5G04040	-0.581149	6.22013	9.8867e-07	5.1388e-05	DOWN		NO
AT5G04150	-1.66977	4.12931	0.000433405	0.00947891	DOWN		NO
AT5G04220	0.546552	4.74027	0.000338931	0.00773935	UP		NO
AT5G04275	2.03383	-0.999501	0.00173734	0.0289681	UP		NO
AT5G04490	-0.351583	5.34824	0.00110431	0.0202693	DOWN		NO
AT5G04550	-0.324584	6.24771	0.00117602	0.0213413	DOWN		NO
AT5G04720	-0.808277	5.4696	3.30268e-08	2.51648e-06	DOWN		NO
AT5G04770	-0.990344	3.41361	2.75222e-08	2.15076e-06	DOWN		NO
AT5G04950	0.73171	5.79545	8.30968e-07	4.42845e-05	UP		NO
AT5G05100	-0.353961	5.92714	0.000656719	0.0133247	DOWN		YES	5:1507158:ATC-A;exonic_variant
AT5G05140	-0.473316	5.57593	0.00023274	0.00562737	DOWN		NO
AT5G05440	-2.32572	5.07988	5.13231e-21	3.32426e-18	DOWN		NO
AT5G05600	-2.11164	4.33675	5.86163e-06	0.000248334	DOWN		NO
AT5G05810	-0.940401	1.1451	0.000489364	0.0104649	DOWN		NO
AT5G05860	-0.837185	4.07445	3.01386e-09	2.97683e-07	DOWN		NO
AT5G05880	-0.699918	3.66988	0.000572729	0.0119075	DOWN		NO
AT5G05960	-0.720465	4.42354	3.2772e-05	0.00108428	DOWN		NO
AT5G05965	-0.722935	3.53153	9.75197e-05	0.00271676	DOWN		NO
AT5G06110	-0.399413	5.8244	0.000241763	0.0057956	DOWN		NO
AT5G06278	-1.11626	0.718679	4.62283e-05	0.00145109	DOWN		NO
AT5G06320	-1.08525	5.48203	1.11121e-06	5.67072e-05	DOWN		NO
AT5G06520	2.6363	-1.48258	1.03281e-05	0.000399869	UP		NO
AT5G06690	-0.625093	4.59775	0.000518038	0.010966	DOWN		NO
AT5G06700	-0.324419	6.34343	0.00102167	0.0190642	DOWN		NO
AT5G06760	0.705234	3.5738	0.000962301	0.0181779	UP		NO
AT5G06870	-0.967764	5.11554	2.07207e-05	0.000738511	DOWN		NO
AT5G07030	-0.611278	5.36028	0.00209843	0.0336665	DOWN		NO
AT5G07080	-0.713749	2.1378	0.00192448	0.0314348	DOWN		NO
AT5G07100	-0.659704	4.64619	0.00293598	0.0436973	DOWN		NO
AT5G07180	-0.563656	4.43273	0.000471222	0.0101608	DOWN		NO
AT5G07350	-1.05851	6.61839	7.32329e-19	3.85399e-16	DOWN		YES	5:2321439:C-T;splice_acceptor_variant
AT5G07560	2.6225	-1.82078	5.70563e-05	0.00171823	UP		NO
AT5G07570	1.83191	-1.01104	4.06987e-05	0.00130426	UP		NO
AT5G07690	1.09031	3.66591	5.4515e-05	0.00165416	UP		NO
AT5G07700	1.42255	0.186624	0.000465974	0.0100864	UP		NO
AT5G07870	-0.477366	4.56912	0.000147059	0.00384259	DOWN		NO
AT5G08150	-3.07332	1.15463	2.99168e-18	1.46033e-15	DOWN		NO
AT5G08290	0.358306	6.42881	0.000390583	0.00868332	UP	YES	NO
AT5G08330	-0.892438	5.29316	3.11944e-08	2.38786e-06	DOWN		NO
AT5G08520	-0.535442	5.80664	1.39138e-07	8.89243e-06	DOWN		NO
AT5G08590	0.284511	6.70376	0.00288354	0.0431646	UP		NO
AT5G08790	-0.831128	5.44278	0.000719049	0.014403	DOWN		NO
AT5G09440	-0.692841	4.66246	5.81029e-06	0.000246469	DOWN		NO
AT5G09630	-0.692315	2.31789	0.000337832	0.00771948	DOWN		NO
AT5G09930	0.720216	3.68097	0.00301105	0.0445585	UP		NO
AT5G09970	-1.36152	2.0852	6.02049e-05	0.00179925	DOWN		NO
AT5G10060	-0.443115	5.11924	0.000185116	0.0046356	DOWN		NO
AT5G10460	-0.429988	4.24131	0.00108592	0.020041	DOWN		NO
AT5G10550	-0.484006	5.98251	4.99806e-05	0.00154016	DOWN		NO
AT5G10560	-0.37042	5.50442	0.000535127	0.0112437	DOWN		NO
AT5G10695	-0.975553	2.44072	0.000202536	0.00500852	DOWN		NO
AT5G10760	1.81413	1.16118	0.00197739	0.0321121	UP		NO
AT5G10860	-0.294296	7.979	0.0028145	0.0423004	DOWN		NO
AT5G10930	1.36258	5.32024	1.40676e-10	1.85808e-08	UP		NO
AT5G11070	-0.960656	4.31057	2.42593e-12	4.34616e-10	DOWN		NO
AT5G11160	-0.789951	2.57422	0.000341009	0.00776574	DOWN		NO
AT5G11190	1.44429	1.18541	2.30771e-06	0.000109013	UP		YES	5:3565013:G-A;protein_coding;missense;CGA>CAA;R>Q
AT5G11360	-1.61286	-1.46806	0.00326773	0.0474732	DOWN		NO
AT5G11580	-0.612194	6.11563	7.86577e-08	5.40667e-06	DOWN		NO
AT5G11590	1.59092	0.628634	3.5141e-06	0.000159944	UP		NO
AT5G11740	-1.29342	7.52599	2.50777e-28	3.83928e-25	DOWN		NO
AT5G12020	-1.46558	-1.12745	0.00111575	0.020446	DOWN		NO
AT5G12050	-0.781213	4.51953	2.70828e-06	0.000125817	DOWN		NO
AT5G12300	-0.714027	2.22108	0.000971223	0.0183157	DOWN		NO
AT5G12850	-0.467289	5.56075	2.24091e-05	0.000783759	DOWN		NO
AT5G12900	-0.367227	4.40306	0.00276609	0.0417967	DOWN		NO
AT5G13090	-0.389067	5.14876	0.000424552	0.00931552	DOWN		NO
AT5G13100	-0.747758	5.75407	4.60524e-10	5.5996e-08	DOWN		NO
AT5G13170	1.60825	6.51056	5.27755e-20	3.17416e-17	UP		NO
AT5G13210	-1.94694	0.197244	2.08307e-08	1.67847e-06	DOWN		NO
AT5G13220	-2.49404	2.58363	1.49599e-08	1.24105e-06	DOWN		NO
AT5G13330	-0.675648	4.56094	9.01213e-05	0.00255288	DOWN		NO
AT5G13700	1.52243	0.638735	1.03275e-06	5.31868e-05	UP		NO
AT5G13730	-0.328739	5.85659	0.00210021	0.0336684	DOWN		NO
AT5G13740	-0.916043	6.96237	0.000486711	0.0104421	DOWN		YES	5:4434318:C-T;protein_coding;missense;GCT>GTT;A>V,5:4434318:C-T;exonic_variant
AT5G13770	0.603406	6.97014	7.40812e-08	5.1446e-06	UP		NO
AT5G13930	0.670535	5.98449	0.00106748	0.0197656	UP		NO
AT5G14120	-1.36018	7.23537	3.34536e-09	3.2565e-07	DOWN		NO
AT5G14170	-0.318303	5.84836	0.00266324	0.0405701	DOWN		NO
AT5G14180	-1.01788	4.40036	4.44528e-06	0.000195459	DOWN		NO
AT5G14420	-0.531397	5.07026	1.42456e-06	7.13996e-05	DOWN		NO
AT5G14450	-0.606929	3.6726	0.00225589	0.0354742	DOWN		NO
AT5G14470	-2.99401	1.67767	1.2904e-22	1.14373e-19	DOWN		NO
AT5G14570	-0.499543	3.72754	0.000644873	0.0131397	DOWN		NO
AT5G14730	-1.00551	2.53475	0.000903879	0.0172876	DOWN		NO
AT5G14740	-0.334645	10.4115	0.00196953	0.0320462	DOWN		NO
AT5G14920	-1.14793	7.3414	4.24082e-09	4.03488e-07	DOWN		NO
AT5G15120	0.753953	3.01472	0.00295262	0.0438673	UP		NO
AT5G15160	-0.745303	3.12466	1.75112e-05	0.000633206	DOWN		NO
AT5G15330	-0.806903	3.87869	7.44401e-08	5.1524e-06	DOWN		NO
AT5G15350	-1.14757	6.10355	1.9901e-22	1.67571e-19	DOWN		NO
AT5G15500	1.07492	4.65147	9.8844e-08	6.60549e-06	UP		NO
AT5G15948	1.22765	6.35996	8.0612e-09	7.14498e-07	UP		NO
AT5G15950	2.33207	-0.230625	8.56263e-05	0.00245028	UP		NO
AT5G15960	0.576004	3.32323	0.000543187	0.0113775	UP		NO
AT5G16023	1.48447	-0.359864	0.000324577	0.007452	UP		NO
AT5G16080	-0.880947	1.80936	0.000249197	0.00593694	DOWN		NO
AT5G16110	-0.386111	7.27344	0.000330278	0.00757256	DOWN		NO
AT5G16120	-0.307426	5.87189	0.0031502	0.0461714	DOWN		NO
AT5G16180	-0.580408	5.41607	5.34963e-08	3.85826e-06	DOWN		NO
AT5G16370	-0.706127	6.72615	6.13618e-07	3.37701e-05	DOWN		NO
AT5G16550	-0.375611	4.89423	0.00170354	0.0285645	DOWN		NO
AT5G16590	-0.491691	5.27687	1.69877e-05	0.000617445	DOWN		NO
AT5G17450	0.994326	2.84489	6.47053e-06	0.000268391	UP		NO
AT5G17460	-0.463546	4.75948	0.00106941	0.0197905	DOWN		NO
AT5G17490	-1.28715	1.73932	3.54522e-05	0.00115929	DOWN		NO
AT5G17600	0.545957	3.82536	0.000285643	0.00668571	UP		NO
AT5G17640	-0.625261	4.58156	4.05545e-06	0.000182279	DOWN		NO
AT5G18030	0.623823	3.21595	0.00252032	0.0387611	UP		NO
AT5G18430	-1.04456	2.07833	2.31061e-05	0.000804226	DOWN		NO
AT5G18650	-0.485485	7.20482	4.47406e-05	0.00141228	DOWN		NO
AT5G18840	1.37604	-0.101125	0.000169226	0.00430938	UP		NO
AT5G19090	-0.492892	6.12601	7.42201e-05	0.00216621	DOWN		NO
AT5G19120	-0.852027	7.64188	2.65806e-06	0.000123998	DOWN		NO
AT5G19190	-1.19008	7.46552	1.4595e-11	2.38629e-09	DOWN		NO
AT5G19230	-0.935507	4.29442	0.00010117	0.00280124	DOWN		NO
AT5G19240	-0.907432	4.26528	0.00175825	0.0292276	DOWN		NO
AT5G19330	-0.384461	6.79156	0.000101218	0.00280124	DOWN		NO
AT5G19340	-1.07919	3.95372	1.39055e-10	1.84391e-08	DOWN		NO
AT5G19470	3.67676	0.0662177	0.000150581	0.00391942	UP		NO
AT5G19530	-0.700701	5.2235	5.03908e-06	0.000219278	DOWN		NO
AT5G19970	0.790846	2.89423	0.00215036	0.0342602	UP		NO
AT5G20230	-3.24715	4.71424	6.69842e-12	1.14954e-09	DOWN		NO
AT5G20250	-1.61369	8.18007	5.22507e-10	6.30772e-08	DOWN		NO
AT5G20600	-0.385484	4.40674	0.00233639	0.0364991	DOWN		NO
AT5G20670	0.941919	1.73147	0.000408758	0.0090278	UP		NO
AT5G20700	0.61605	8.87693	1.18504e-07	7.72021e-06	UP		NO
AT5G20830	0.5113	5.08964	0.000541205	0.0113501	UP		NO
AT5G20935	0.516712	3.39022	0.00197262	0.032081	UP		NO
AT5G21020	0.548319	8.91415	1.31186e-06	6.59472e-05	UP		NO
AT5G21160	-0.569387	6.1908	5.55735e-07	3.09896e-05	DOWN		NO
AT5G21170	-0.673455	6.14554	3.25821e-07	1.90521e-05	DOWN		YES	5:7207927:C-T;splice_acceptor_region_variant&protein_coding;sense;AAC>AAT;N>N
AT5G21326	-0.393469	6.27057	0.000260349	0.00616398	DOWN		NO
AT5G21930	-0.52842	6.30782	1.5721e-07	9.89715e-06	DOWN		NO
AT5G22060	-0.726066	5.68596	1.577e-08	1.29865e-06	DOWN		YES	5:7304876:C-T;splice_donor_variant
AT5G22250	-0.962407	2.51377	0.000534591	0.0112437	DOWN		NO
AT5G22390	0.968422	3.18932	9.83455e-06	0.000386508	UP		NO
AT5G22460	1.26974	4.42579	2.26797e-11	3.5529e-09	UP		NO
AT5G22580	0.836605	6.11525	1.79083e-07	1.11286e-05	UP		NO
AT5G22640	-0.378651	7.34173	0.000432326	0.00946146	DOWN		NO
AT5G22690	-0.537882	4.0073	0.00075955	0.0150573	DOWN		NO
AT5G22920	-1.3238	6.62368	2.78768e-16	9.37346e-14	DOWN		YES	5:7665407:G-A;splice_donor_region_variant
AT5G22940	-0.779765	4.06823	0.000177292	0.00448126	DOWN		NO
AT5G23050	-0.54654	5.64993	3.82089e-05	0.00123623	DOWN		NO
AT5G23060	0.584268	8.8682	6.95157e-08	4.87783e-06	UP		NO
AT5G23080	-0.427029	5.17757	0.000384581	0.00859527	DOWN	YES	NO
AT5G23130	-0.724688	3.23009	4.58909e-05	0.00144184	DOWN		NO
AT5G23210	-0.420824	5.40283	0.00275827	0.0417158	DOWN		NO
AT5G23230	-1.64576	1.20651	7.27852e-09	6.53728e-07	DOWN		NO
AT5G23235	-1.01625	1.54947	0.00126437	0.0226758	DOWN		NO
AT5G23420	0.735111	3.89604	3.04668e-05	0.00101599	UP		NO
AT5G23610	-0.377261	5.35439	0.000594889	0.0123226	DOWN		NO
AT5G23660	-0.693997	5.16477	2.39295e-05	0.000827484	DOWN		NO
AT5G23820	0.462256	5.73311	0.00329817	0.0477583	UP		NO
AT5G23860	-0.529168	5.84639	5.7539e-06	0.000244693	DOWN		NO
AT5G23990	2.43312	0.242459	7.97854e-06	0.000320675	UP		YES	5:8107952:G-A;intronic_variant
AT5G24030	-0.79264	5.72776	1.42264e-05	0.000529459	DOWN		NO
AT5G24150	0.982946	5.95026	1.87179e-09	1.95788e-07	UP		NO
AT5G24155	1.1603	3.6445	7.42145e-09	6.63029e-07	UP		NO
AT5G24210	-1.01043	6.21286	8.58596e-05	0.00245487	DOWN		NO
AT5G24280	-0.877917	3.4229	3.19413e-06	0.000146569	DOWN		NO
AT5G24380	0.945797	5.50422	1.84345e-09	1.94029e-07	UP		NO
[truncated: 350 more rows]

## Sheet: coilin_share
Gene ID	Direction of change	description	comp_description	IPR_domain	has SNP/indels?	SNPs/indels
AT1G01120	DOWN	3-ketoacyl-CoA synthase 1	3-ketoacyl-CoA synthase 1 (KCS1); FUNCTIONS IN: fatty acid elongase activity, acyltransferase activity; INVOLVED IN: in 7 processes; LOCATED IN: cytosolic ribosome, endoplasmic reticulum, membrane; EXPRESSED IN: 29 plant structures; EXPRESSED DURING: 13 growth stages; CONTAINS InterPro DOMAIN/s: Thiolase-like (InterPro:IPR016039), Very-long-chain 3-ketoacyl-CoA synthase (InterPro:IPR012392), 3-Ox…	3-Oxoacyl-[acyl-carrier-protein (ACP)] synthase III C-terminal | FAE1/Type III polyketide synthase-like protein | Thiolase-like | Thiolase-like, subgroup | Very-long-chain 3-ketoacyl-CoA synthase	NO
AT1G01620	DOWN	plasma membrane intrinsic protein 1C	plasma membrane intrinsic protein 1C (PIP1C); FUNCTIONS IN: water channel activity; INVOLVED IN: response to water deprivation, response to salt stress, transport, water transport; LOCATED IN: plasma membrane, chloroplast, membrane; LOCATED IN: plasma membrane, membrane; EXPRESSED IN: 22 plant structures; EXPRESSED DURING: 14 growth stages; CONTAINS InterPro DOMAIN/s: Major intrinsic protein, con…	Aquaporin-like | Major intrinsic protein | Major intrinsic protein, conserved site	NO
AT1G01650	UP	SIGNAL PEPTIDE PEPTIDASE-LIKE 4	SIGNAL PEPTIDE PEPTIDASE-LIKE 4 (SPPL4); FUNCTIONS IN: peptidase activity, aspartic-type endopeptidase activity; INVOLVED IN: proteolysis; LOCATED IN: endomembrane system, integral to membrane; LOCATED IN: integral to membrane; EXPRESSED IN: 24 plant structures; EXPRESSED DURING: 13 growth stages; CONTAINS InterPro DOMAIN/s: Peptidase A22, presenilin signal peptide (InterPro:IPR006639), Peptidase…	Peptidase A22B, signal peptide peptidase | Presenilin/signal peptide peptidase | Protease-associated domain, PA	NO
AT1G01770	UP		unknown protein; CONTAINS InterPro DOMAIN/s: Protein of unknown function DUF1446 (InterPro:IPR010839)	Protein of unknown function DUF1446	NO
AT1G01830	UP	ARM repeat superfamily protein	ARM repeat superfamily protein; FUNCTIONS IN: binding; LOCATED IN: cellular_component unknown; EXPRESSED IN: 22 plant structures; EXPRESSED DURING: 13 growth stages; CONTAINS InterPro DOMAIN/s: Armadillo-like helical (InterPro:IPR011989), Armadillo (InterPro:IPR000225), Armadillo-type fold (InterPro:IPR016024); BEST Arabidopsis thaliana protein match is: ARM repeat superfamily protein (TAIR:AT2G4…	Armadillo | Armadillo-like helical | Armadillo-type fold	NO
AT1G02380	DOWN		unknown protein; BEST Arabidopsis thaliana protein match is: unknown protein (TAIR:AT4G01960.1)		NO
AT1G02610	DOWN	RING/FYVE/PHD zinc finger superfamily protein	RING/FYVE/PHD zinc finger superfamily protein; FUNCTIONS IN: zinc ion binding; CONTAINS InterPro DOMAIN/s: Protein of unknown function DUF3675 (InterPro:IPR022143), Zinc finger, C3HC4 RING-type (InterPro:IPR018957), Zinc finger, RING-CH-type (InterPro:IPR011016); BEST Arabidopsis thaliana protein match is: RING/FYVE/PHD zinc finger superfamily protein (TAIR:AT4G02075.1)	Protein of unknown function DUF3675 | Zinc finger, RING-CH-type | Zinc finger, RING/FYVE/PHD-type	NO
AT1G02620	DOWN	Ras-related small GTP-binding family protein	Ras-related small GTP-binding family protein; FUNCTIONS IN: GTP binding; INVOLVED IN: intracellular protein transport; LOCATED IN: endomembrane system, intracellular; CONTAINS InterPro DOMAIN/s: Small GTPase SAR1-type (InterPro:IPR006687), ARF/SAR superfamily (InterPro:IPR006689); BEST Arabidopsis thaliana protein match is: secretion-associated RAS super family 2 (TAIR:AT4G02080.1)	P-loop containing nucleoside triphosphate hydrolase | Small GTPase superfamily, ARF/SAR type | Small GTPase superfamily, SAR1-type	NO
AT1G02640	DOWN	beta-xylosidase 2	beta-xylosidase 2 (BXL2); FUNCTIONS IN: hydrolase activity, hydrolyzing O-glycosyl compounds; INVOLVED IN: carbohydrate metabolic process; LOCATED IN: plant-type cell wall; EXPRESSED IN: 23 plant structures; EXPRESSED DURING: 13 growth stages; CONTAINS InterPro DOMAIN/s: Glycoside hydrolase, family 3, N-terminal (InterPro:IPR001764), Glycoside hydrolase, family 3, C-terminal (InterPro:IPR002772),…	Fibronectin type III-like domain | Glycoside hydrolase family 3 | Glycoside hydrolase family 3 C-terminal domain | Glycoside hydrolase, family 3, N-terminal | Glycoside hydrolase, superfamily	NO
AT1G02660	DOWN	alpha/beta-Hydrolases superfamily protein	alpha/beta-Hydrolases superfamily protein; FUNCTIONS IN: triglyceride lipase activity; INVOLVED IN: lipid metabolic process; LOCATED IN: cellular_component unknown; EXPRESSED IN: 24 plant structures; EXPRESSED DURING: 15 growth stages; CONTAINS InterPro DOMAIN/s: Lipase, class 3 (InterPro:IPR002921); BEST Arabidopsis thaliana protein match is: alpha/beta-Hydrolases superfamily protein (TAIR:AT3G6…	Alpha/Beta hydrolase fold | Fungal lipase-like domain	NO
AT1G03090	DOWN	methylcrotonyl-CoA carboxylase alpha chain, mitochondrial / 3-methylcrotonyl-CoA carboxylase 1 (MCCA)	MCCA; FUNCTIONS IN: cobalt ion binding, methylcrotonoyl-CoA carboxylase activity; INVOLVED IN: leucine catabolic process; LOCATED IN: mitochondrion, cytosolic ribosome; EXPRESSED IN: 26 plant structures; EXPRESSED DURING: 13 growth stages; CONTAINS InterPro DOMAIN/s: Single hybrid motif (InterPro:IPR011053), Biotin/lipoyl attachment (InterPro:IPR000089), Carbamoyl phosphate synthase, large subuni…	ATP-grasp fold | ATP-grasp fold, subdomain 1 | ATP-grasp fold, subdomain 2 | Biotin carboxylase, C-terminal | Biotin carboxylation domain | Biotin-binding site | Biotin/lipoyl attachment | Carbamoyl-phosphate synthase, large subunit, N-terminal | Carbamoyl-phosphate synthetase large subunit-like, ATP-binding domain | Pre-ATP-grasp domain | Rudiment single hybrid motif | Single hybrid motif	NO
AT1G03300	DOWN	DOMAIN OF UNKNOWN FUNCTION 724 1	DOMAIN OF UNKNOWN FUNCTION 724 1 (ATDUF1); FUNCTIONS IN: RNA binding; INVOLVED IN: biological_process unknown; LOCATED IN: nucleus; EXPRESSED IN: 30 plant structures; EXPRESSED DURING: 14 growth stages; CONTAINS InterPro DOMAIN/s: Tudor-like, plant (InterPro:IPR014002), Agenet (InterPro:IPR008395), Protein of unknown function DUF724 (InterPro:IPR007930); BEST Arabidopsis thaliana protein match is…	Agenet-like domain | Protein of unknown function DUF724 | Tudor-like, plant	NO
AT1G03580	DOWN		pseudogene, meprin and TRAF homology (MATH) domain protein -related, weak similarity to ubiquitin-specific protease 12 (Arabidopsis thaliana) GI:11993471; contains weak hit to Pfam PF00917: MATH domain		NO
AT1G03870	DOWN	FASCICLIN-like arabinoogalactan 9	FASCICLIN-like arabinoogalactan 9 (FLA9); LOCATED IN: anchored to plasma membrane, plasma membrane, anchored to membrane; EXPRESSED IN: 23 plant structures; EXPRESSED DURING: 14 growth stages; CONTAINS InterPro DOMAIN/s: FAS1 domain (InterPro:IPR000782); BEST Arabidopsis thaliana protein match is: FASCICLIN-like arabinogalactan protein 13 precursor (TAIR:AT5G44130.1)	FAS1 domain	NO
AT1G04240	DOWN	AUX/IAA transcriptional regulator family protein	SHORT HYPOCOTYL 2 (SHY2); FUNCTIONS IN: sequence-specific DNA binding transcription factor activity; INVOLVED IN: response to auxin stimulus, response to cyclopentenone, response to brassinosteroid stimulus; LOCATED IN: nucleus; EXPRESSED IN: 22 plant structures; EXPRESSED DURING: 13 growth stages; CONTAINS InterPro DOMAIN/s: Aux/IAA-ARF-dimerisation (InterPro:IPR011525), AUX/IAA protein (InterPr…		NO
AT1G04250	UP	AUX/IAA transcriptional regulator family protein	AUXIN RESISTANT 3 (AXR3); CONTAINS InterPro DOMAIN/s: Aux/IAA-ARF-dimerisation (InterPro:IPR011525), AUX/IAA protein (InterPro:IPR003311); BEST Arabidopsis thaliana protein match is: indole-3-acetic acid inducible 14 (TAIR:AT4G14550.1)	AUX/IAA protein | Aux/IAA-ARF-dimerisation	NO
AT1G04330	DOWN		unknown protein; FUNCTIONS IN: molecular_function unknown; INVOLVED IN: biological_process unknown; LOCATED IN: chloroplast; BEST Arabidopsis thaliana protein match is: unknown protein (TAIR:AT3G23170.1)		NO
AT1G05170	UP	Galactosyltransferase family protein	Galactosyltransferase family protein; FUNCTIONS IN: transferase activity, transferring hexosyl groups, transferase activity, transferring glycosyl groups; INVOLVED IN: protein amino acid glycosylation; LOCATED IN: endomembrane system, membrane; LOCATED IN: membrane; EXPRESSED IN: 14 plant structures; EXPRESSED DURING: 4 anthesis, C globular stage, 4 leaf senescence stage, petal differentiation an…	Domain of unknown function DUF4094 | Glycosyl transferase, family 31	NO
AT1G05310	UP	Pectin lyase-like superfamily protein	Pectin lyase-like superfamily protein; FUNCTIONS IN: pectinesterase activity; INVOLVED IN: cell wall modification; LOCATED IN: endomembrane system, cell wall, plant-type cell wall; EXPRESSED IN: 12 plant structures; EXPRESSED DURING: 6 growth stages; CONTAINS InterPro DOMAIN/s: Pectinesterase, active site (InterPro:IPR018040), Pectin lyase fold/virulence factor (InterPro:IPR011050), Pectinesteras…	Pectin lyase fold | Pectin lyase fold/virulence factor | Pectinesterase, active site | Pectinesterase, catalytic	NO
AT1G05340	DOWN		unknown protein; FUNCTIONS IN: molecular_function unknown; INVOLVED IN: biological_process unknown; LOCATED IN: chloroplast; EXPRESSED IN: 14 plant structures; EXPRESSED DURING: 7 growth stages; BEST Arabidopsis thaliana protein match is: unknown protein (TAIR:AT2G32210.1)	Cysteine-rich transmembrane CYSTM domain	NO
AT1G05540	UP	Protein of unknown function (DUF295)	Protein of unknown function (DUF295); FUNCTIONS IN: molecular_function unknown; INVOLVED IN: biological_process unknown; LOCATED IN: mitochondrion; EXPRESSED IN: 21 plant structures; EXPRESSED DURING: 13 growth stages; CONTAINS InterPro DOMAIN/s: Protein of unknown function DUF295 (InterPro:IPR005174); BEST Arabidopsis thaliana protein match is: Protein of unknown function (DUF295) (TAIR:AT1G3016…	Protein of unknown function DUF295	NO
AT1G05660	UP	Pectin lyase-like superfamily protein	Pectin lyase-like superfamily protein; FUNCTIONS IN: polygalacturonase activity; INVOLVED IN: carbohydrate metabolic process; LOCATED IN: endomembrane system; CONTAINS InterPro DOMAIN/s: Pectin lyase fold/virulence factor (InterPro:IPR011050), Pectin lyase fold (InterPro:IPR012334), Glycoside hydrolase, family 28 (InterPro:IPR000743), Parallel beta-helix repeat (InterPro:IPR006626); BEST Arabidop…	Glycoside hydrolase, family 28 | Parallel beta-helix repeat | Pectin lyase fold | Pectin lyase fold/virulence factor	NO
AT1G06000	UP	UDP-Glycosyltransferase superfamily protein	UDP-Glycosyltransferase superfamily protein; CONTAINS InterPro DOMAIN/s: UDP-glucuronosyl/UDP-glucosyltransferase (InterPro:IPR002213); BEST Arabidopsis thaliana protein match is: UDP-glucosyl transferase 89B1 (TAIR:AT1G73880.1)	UDP-glucuronosyl/UDP-glucosyltransferase	NO
AT1G06100	UP	Fatty acid desaturase family protein	Fatty acid desaturase family protein; FUNCTIONS IN: oxidoreductase activity, oxidoreductase activity, acting on paired donors, with oxidation of a pair of donors resulting in the reduction of molecular oxygen to two molecules of water; INVOLVED IN: oxidation reduction, lipid metabolic process; EXPRESSED IN: 17 plant structures; EXPRESSED DURING: 11 growth stages; CONTAINS InterPro DOMAIN/s: Fatty…	Fatty acid desaturase, type 1 | Fatty acid desaturase, type 1, core	NO
AT1G06160	UP	octadecanoid-responsive Arabidopsis AP2/ERF 59	octadecanoid-responsive Arabidopsis AP2/ERF 59 (ORA59); CONTAINS InterPro DOMAIN/s: DNA-binding, integrase-type (InterPro:IPR016177), Pathogenesis-related transcriptional factor/ERF, DNA-binding (InterPro:IPR001471); BEST Arabidopsis thaliana protein match is: ethylene-responsive element binding factor 15 (TAIR:AT2G31230.1)	AP2/ERF domain | DNA-binding domain	NO
AT1G06570	DOWN	phytoene desaturation 1	phytoene desaturation 1 (PDS1); CONTAINS InterPro DOMAIN/s: 4-hydroxyphenylpyruvate dioxygenase (InterPro:IPR005956), Glyoxalase/bleomycin resistance protein/dioxygenase (InterPro:IPR004360)	4-hydroxyphenylpyruvate dioxygenase | Glyoxalase/Bleomycin resistance protein/Dihydroxybiphenyl dioxygenase | Glyoxalase/fosfomycin resistance/dioxygenase domain	NO
AT1G06640	UP	2-oxoglutarate (2OG) and Fe(II)-dependent oxygenase superfamily protein	2-oxoglutarate (2OG) and Fe(II)-dependent oxygenase superfamily protein; CONTAINS InterPro DOMAIN/s: Oxoglutarate/iron-dependent oxygenase (InterPro:IPR005123); BEST Arabidopsis thaliana protein match is: 2-oxoglutarate (2OG) and Fe(II)-dependent oxygenase superfamily protein (TAIR:AT1G06650.2)	Isopenicillin N synthase-like | Non-haem dioxygenase N-terminal domain | Oxoglutarate/iron-dependent dioxygenase	NO
AT1G07010	DOWN	Calcineurin-like metallo-phosphoesterase superfamily protein	Calcineurin-like metallo-phosphoesterase superfamily protein; BEST Arabidopsis thaliana protein match is: Calcineurin-like metallo-phosphoesterase superfamily protein (TAIR:AT1G18480.1); FUNCTIONS IN: hydrolase activity, protein serine/threonine phosphatase activity; INVOLVED IN: biological_process unknown; EXPRESSED IN: 21 plant structures; LOCATED IN: peroxisome; EXPRESSED DURING: 13 growth sta…	Calcineurin-like phosphoesterase domain, apaH type | Metallo-dependent phosphatase-like	NO
AT1G07090	UP	Protein of unknown function (DUF640)	LIGHT SENSITIVE HYPOCOTYLS 6 (LSH6); CONTAINS InterPro DOMAIN/s: Protein of unknown function DUF640 (InterPro:IPR006936); BEST Arabidopsis thaliana protein match is: Protein of unknown function (DUF640) (TAIR:AT5G58500.1)	Domain of unknown function DUF640	NO
AT1G08630	DOWN	threonine aldolase 1	threonine aldolase 1 (THA1); CONTAINS InterPro DOMAIN/s: Pyridoxal phosphate-dependent transferase, major domain (InterPro:IPR015424), Aromatic amino acid beta-eliminating lyase/threonine aldolase (InterPro:IPR001597), Pyridoxal phosphate-dependent transferase, major region, subdomain 1 (InterPro:IPR015421), Pyridoxal phosphate-dependent transferase, major region, subdomain 2 (InterPro:IPR015422)…	Aromatic amino acid beta-eliminating lyase/threonine aldolase | Pyridoxal phosphate-dependent transferase | Pyridoxal phosphate-dependent transferase, major region, subdomain 1 | Pyridoxal phosphate-dependent transferase, major region, subdomain 2 | Threonine aldolase	NO
AT1G08830	DOWN	copper/zinc superoxide dismutase 1	copper/zinc superoxide dismutase 1 (CSD1); CONTAINS InterPro DOMAIN/s: Superoxide dismutase, copper/zinc, binding site (InterPro:IPR018152), Superoxide dismutase, copper/zinc binding (InterPro:IPR001424); FUNCTIONS IN: superoxide dismutase activity; BEST Arabidopsis thaliana protein match is: copper/zinc superoxide dismutase 2 (TAIR:AT2G28190.1); INVOLVED IN: in 7 processes; LOCATED IN: cytosol, …	Superoxide dismutase, copper/zinc binding domain | Superoxide dismutase, copper/zinc, binding site	NO
AT1G08980	DOWN	amidase 1	amidase 1 (AMI1); FUNCTIONS IN: amidase activity, hydrolase activity, acting on carbon-nitrogen (but not peptide) bonds, indoleacetamide hydrolase activity; INVOLVED IN: indoleacetic acid biosynthetic process; LOCATED IN: cytoplasm; EXPRESSED IN: 25 plant structures; EXPRESSED DURING: 13 growth stages; CONTAINS InterPro DOMAIN/s: Amidase, conserved site (InterPro:IPR020556), Amidase (InterPro:IPR…	Amidase | Amidase signature domain | Amidase, conserved site	NO
AT1G08990	UP	plant glycogenin-like starch initiation protein 5	plant glycogenin-like starch initiation protein 5 (PGSIP5); FUNCTIONS IN: transferase activity, transferring glycosyl groups; INVOLVED IN: biosynthetic process; LOCATED IN: endomembrane system; EXPRESSED IN: root; CONTAINS InterPro DOMAIN/s: Glycosyl transferase, family 8 (InterPro:IPR002495); BEST Arabidopsis thaliana protein match is: plant glycogenin-like starch initiation protein 4 (TAIR:AT1G…	Glycosyl transferase, family 8 | Nucleotide-diphospho-sugar transferases	NO
AT1G10020	DOWN	Protein of unknown function (DUF1005)	Protein of unknown function (DUF1005); CONTAINS InterPro DOMAIN/s: Protein of unknown function DUF1005 (InterPro:IPR010410); BEST Arabidopsis thaliana protein match is: Protein of unknown function (DUF1005) (TAIR:AT4G29310.1)	Protein of unknown function DUF1005	NO
AT1G10070	DOWN	branched-chain amino acid transaminase 2	branched-chain amino acid transaminase 2 (BCAT-2); FUNCTIONS IN: branched-chain-amino-acid transaminase activity, catalytic activity; INVOLVED IN: branched chain family amino acid metabolic process, metabolic process; LOCATED IN: chloroplast; EXPRESSED IN: 21 plant structures; EXPRESSED DURING: 14 growth stages; CONTAINS InterPro DOMAIN/s: Aminotransferase, class IV (InterPro:IPR001544), Aminotra…	Aminotransferase, class IV | Aminotransferase, class IV, conserved site | Branched-chain amino acid aminotransferase II	NO
AT1G10550	DOWN	xyloglucan:xyloglucosyl transferase 33	xyloglucan:xyloglucosyl transferase 33 (XTH33); FUNCTIONS IN: hydrolase activity, acting on glycosyl bonds, hydrolase activity, hydrolyzing O-glycosyl compounds, xyloglucan:xyloglucosyl transferase activity; INVOLVED IN: plant-type cell wall modification involved in multidimensional cell growth; LOCATED IN: integral to plasma membrane; EXPRESSED IN: 14 plant structures; EXPRESSED DURING: 7 growth…	Concanavalin A-like lectin/glucanase, subgroup | Concanavalin A-like lectin/glucanases superfamily | Glycoside hydrolase, family 16 | Xyloglucan endo-transglycosylase, C-terminal | Xyloglucan endotransglucosylase/hydrolase	NO
AT1G11260	DOWN	sugar transporter 1	sugar transporter 1 (STP1); FUNCTIONS IN: carbohydrate transmembrane transporter activity, sugar:hydrogen symporter activity; INVOLVED IN: transport, transmembrane transport; LOCATED IN: nucleus, plasma membrane, vacuole, membrane; EXPRESSED IN: 25 plant structures; EXPRESSED DURING: 13 growth stages; CONTAINS InterPro DOMAIN/s: Sugar transporter, conserved site (InterPro:IPR005829), Major facili…	General substrate transporter | Major facilitator superfamily domain | Major facilitator superfamily domain, general substrate transporter | Sugar transporter, conserved site | Sugar/inositol transporter	NO
AT1G11310	UP	Seven transmembrane MLO family protein	MILDEW RESISTANCE LOCUS O 2 (MLO2); FUNCTIONS IN: calmodulin binding; INVOLVED IN: defense response to fungus, incompatible interaction, cell death, response to fungus, negative regulation of defense response, defense response; LOCATED IN: plasma membrane; EXPRESSED IN: 29 plant structures; EXPRESSED DURING: 14 growth stages; CONTAINS InterPro DOMAIN/s: Mlo-related protein (InterPro:IPR004326); B…	Mlo-related protein	NO
AT1G11380	DOWN	PLAC8 family protein	PLAC8 family protein; CONTAINS InterPro DOMAIN/s: Protein of unknown function Cys-rich (InterPro:IPR006461); BEST Arabidopsis thaliana protein match is: PLAC8 family protein (TAIR:AT5G05350.1)	Uncharacterised protein family Cys-rich	NO
AT1G11785	UP		unknown protein; FUNCTIONS IN: molecular_function unknown; INVOLVED IN: biological_process unknown; LOCATED IN: cellular_component unknown		NO
AT1G11840	UP	glyoxalase I homolog	glyoxalase I homolog (GLX1); FUNCTIONS IN: lactoylglutathione lyase activity, metal ion binding; INVOLVED IN: carbohydrate metabolic process; INVOLVED IN: response to cadmium ion, carbohydrate metabolic process; LOCATED IN: peroxisome; LOCATED IN: peroxisome, plasma membrane, vacuole; LOCATED IN: peroxisome, plasma membrane, vacuole, chloroplast envelope; EXPRESSED IN: 25 plant structures; EXPRES…	Glyoxalase I | Glyoxalase I, conserved site | Glyoxalase/Bleomycin resistance protein/Dihydroxybiphenyl dioxygenase | Glyoxalase/fosfomycin resistance/dioxygenase domain	NO
AT1G12090	DOWN	extensin-like protein	extensin-like protein (ELP); FUNCTIONS IN: lipid binding; INVOLVED IN: lipid transport; LOCATED IN: endomembrane system; EXPRESSED IN: 22 plant structures; EXPRESSED DURING: 13 growth stages; CONTAINS InterPro DOMAIN/s: Bifunctional inhibitor/plant lipid transfer protein/seed storage (InterPro:IPR016140), Plant lipid transfer protein/seed storage/trypsin-alpha amylase inhibitor (InterPro:IPR00361…	Bifunctional inhibitor/plant lipid transfer protein/seed storage helical domain	NO
AT1G12220	DOWN	Disease resistance protein (CC-NBS-LRR class) family	RESISTANT TO P. SYRINGAE 5 (RPS5); CONTAINS InterPro DOMAIN/s: Leucine-rich repeat-containing protein (InterPro:IPR015766), NB-ARC (InterPro:IPR002182), Disease resistance protein (InterPro:IPR000767); BEST Arabidopsis thaliana protein match is: LRR and NB-ARC domains-containing disease resistance protein (TAIR:AT1G12280.1)	Leucine-rich repeat | NB-ARC | P-loop containing nucleoside triphosphate hydrolase	NO
AT1G12230	DOWN	Aldolase superfamily protein	Aldolase superfamily protein; FUNCTIONS IN: transaldolase activity, zinc ion binding; INVOLVED IN: carbohydrate metabolic process, metabolic process; INVOLVED IN: glucose catabolic process to lactate and acetate, 5-phosphoribose 1-diphosphate biosynthetic process, carbohydrate metabolic process, metabolic process, pentose-phosphate shunt, non-oxidative branch; EXPRESSED IN: 23 plant structures; L…	Aldolase-type TIM barrel | Transaldolase	NO
AT1G12280	UP	LRR and NB-ARC domains-containing disease resistance protein	LRR and NB-ARC domains-containing disease resistance protein; FUNCTIONS IN: ATP binding; INVOLVED IN: N-terminal protein myristoylation, defense response, apoptosis; LOCATED IN: endomembrane system; EXPRESSED IN: 13 plant structures; EXPRESSED DURING: 9 growth stages; CONTAINS InterPro DOMAIN/s: NB-ARC (InterPro:IPR002182), Disease resistance protein (InterPro:IPR000767); BEST Arabidopsis thalian…	Leucine-rich repeat | NB-ARC | P-loop containing nucleoside triphosphate hydrolase	NO
AT1G12450	DOWN	SNARE associated Golgi protein family	SNARE associated Golgi protein family; CONTAINS InterPro DOMAIN/s: SNARE associated Golgi protein (InterPro:IPR015414); BEST Arabidopsis thaliana protein match is: SNARE associated Golgi protein family (TAIR:AT4G22850.1)	SNARE associated Golgi protein	NO
AT1G12520	DOWN	copper chaperone for SOD1	copper chaperone for SOD1 (CCS); FUNCTIONS IN: superoxide dismutase copper chaperone activity, superoxide dismutase activity; INVOLVED IN: cellular copper ion homeostasis; LOCATED IN: chloroplast; EXPRESSED IN: 22 plant structures; EXPRESSED DURING: 13 growth stages; CONTAINS InterPro DOMAIN/s: Heavy metal transport/detoxification protein (InterPro:IPR006121), Superoxide dismutase, copper/zinc bi…	Heavy metal-associated domain, HMA | Superoxide dismutase, copper/zinc binding domain	NO
AT1G12780	DOWN	UDP-D-glucose/UDP-D-galactose 4-epimerase 1	UDP-D-glucose/UDP-D-galactose 4-epimerase 1 (UGE1); FUNCTIONS IN: UDP-glucose 4-epimerase activity, protein dimerization activity; INVOLVED IN: response to stress, galactose biosynthetic process; LOCATED IN: cytosol, plasma membrane; EXPRESSED IN: 32 plant structures; EXPRESSED DURING: 16 growth stages; CONTAINS InterPro DOMAIN/s: NAD-dependent epimerase/dehydratase (InterPro:IPR001509), NAD(P)-b…	NAD(P)-binding domain | NAD-dependent epimerase/dehydratase, N-terminal domain | Nucleotide sugar epimerase | UDP-glucose 4-epimerase C-terminal domain | UDP-glucose 4-epimerase GalE	NO
AT1G12805	UP	nucleotide binding	nucleotide binding		NO
AT1G12990	DOWN	beta-1,4-N-acetylglucosaminyltransferase family protein	beta-1,4-N-acetylglucosaminyltransferase family protein; FUNCTIONS IN: transferase activity, transferring glycosyl groups, acetylglucosaminyltransferase activity; INVOLVED IN: protein amino acid N-linked glycosylation; LOCATED IN: membrane; EXPRESSED IN: 23 plant structures; EXPRESSED DURING: 13 growth stages; CONTAINS InterPro DOMAIN/s: Glycosyl transferase, family 17 (InterPro:IPR006813); BEST …	Glycosyl transferase, family 17	NO
AT1G13360	UP		unknown protein; FUNCTIONS IN: molecular_function unknown; INVOLVED IN: biological_process unknown; LOCATED IN: cellular_component unknown; BEST Arabidopsis thaliana protein match is: unknown protein (TAIR:AT3G25870.1)		NO
AT1G13448	UP	other RNA			NO
AT1G13700	DOWN	6-phosphogluconolactonase 1	6-phosphogluconolactonase 1 (PGL1); FUNCTIONS IN: 6-phosphogluconolactonase activity, catalytic activity; INVOLVED IN: pentose-phosphate shunt, carbohydrate metabolic process; LOCATED IN: cellular_component unknown; EXPRESSED IN: 11 plant structures; EXPRESSED DURING: LP.06 six leaves visible, LP.04 four leaves visible, 4 anthesis, petal differentiation and expansion stage; CONTAINS InterPro DOMA…	6-phosphogluconolactonase, DevB-type | Glucosamine/galactosamine-6-phosphate isomerase	NO
AT1G13750	UP	Purple acid phosphatases superfamily protein	Purple acid phosphatases superfamily protein; FUNCTIONS IN: hydrolase activity, protein serine/threonine phosphatase activity, metal ion binding, acid phosphatase activity; INVOLVED IN: biological_process unknown; LOCATED IN: endomembrane system; EXPRESSED IN: 21 plant structures; EXPRESSED DURING: 13 growth stages; CONTAINS InterPro DOMAIN/s: Purple acid phosphatase, N-terminal (InterPro:IPR0159…	Calcineurin-like phosphoesterase domain, apaH type | Fibronectin, type III | Iron/zinc purple acid phosphatase-like C-terminal domain | Metallo-dependent phosphatase-like | Purple acid phosphatase, N-terminal | Purple acid phosphatase-like, N-terminal	NO
AT1G14120	UP	2-oxoglutarate (2OG) and Fe(II)-dependent oxygenase superfamily protein	2-oxoglutarate (2OG) and Fe(II)-dependent oxygenase superfamily protein; FUNCTIONS IN: oxidoreductase activity, acting on paired donors, with incorporation or reduction of molecular oxygen, 2-oxoglutarate as one donor, and incorporation of one atom each of oxygen into both donors, oxidoreductase activity; INVOLVED IN: biological_process unknown; LOCATED IN: cellular_component unknown; EXPRESSED I…	Isopenicillin N synthase-like | Non-haem dioxygenase N-terminal domain | Oxoglutarate/iron-dependent dioxygenase	NO
AT1G14130	UP	2-oxoglutarate (2OG) and Fe(II)-dependent oxygenase superfamily protein	2-oxoglutarate (2OG) and Fe(II)-dependent oxygenase superfamily protein; FUNCTIONS IN: oxidoreductase activity, acting on paired donors, with incorporation or reduction of molecular oxygen, 2-oxoglutarate as one donor, and incorporation of one atom each of oxygen into both donors, oxidoreductase activity; INVOLVED IN: biological_process unknown; LOCATED IN: nucleus; EXPRESSED IN: 23 plant structu…	Isopenicillin N synthase-like | Non-haem dioxygenase N-terminal domain | Oxoglutarate/iron-dependent dioxygenase	NO
AT1G14240	UP	GDA1/CD39 nucleoside phosphatase family protein	GDA1/CD39 nucleoside phosphatase family protein; FUNCTIONS IN: hydrolase activity; INVOLVED IN: biological_process unknown; LOCATED IN: cellular_component unknown; EXPRESSED IN: 20 plant structures; EXPRESSED DURING: 11 growth stages; CONTAINS InterPro DOMAIN/s: Nucleoside phosphatase GDA1/CD39 (InterPro:IPR000407); BEST Arabidopsis thaliana protein match is: GDA1/CD39 nucleoside phosphatase fami…	Nucleoside phosphatase GDA1/CD39	NO
AT1G14280	DOWN	phytochrome kinase substrate 2	phytochrome kinase substrate 2 (PKS2); BEST Arabidopsis thaliana protein match is: phytochrome kinase substrate 1 (TAIR:AT2G02950.1)		NO
AT1G14960	UP	Polyketide cyclase/dehydrase and lipid transport superfamily protein	Polyketide cyclase/dehydrase and lipid transport superfamily protein; FUNCTIONS IN: molecular_function unknown; INVOLVED IN: response to biotic stimulus, defense response; LOCATED IN: cellular_component unknown; EXPRESSED IN: root; CONTAINS InterPro DOMAIN/s: Bet v I allergen (InterPro:IPR000916); BEST Arabidopsis thaliana protein match is: Polyketide cyclase/dehydrase and lipid transport superfa…	Bet v I domain | Major latex protein domain | START-like domain	NO
AT1G15100	UP	RING-H2 finger A2A	RING-H2 finger A2A (RHA2A); FUNCTIONS IN: ubiquitin-protein ligase activity, zinc ion binding; INVOLVED IN: response to salt stress, positive regulation of abscisic acid mediated signaling pathway, regulation of response to osmotic stress; LOCATED IN: endomembrane system; EXPRESSED IN: 21 plant structures; EXPRESSED DURING: 8 growth stages; CONTAINS InterPro DOMAIN/s: Zinc finger, RING-type (Inte…	Zinc finger, RING-type | Zinc finger, RING/FYVE/PHD-type	NO
AT1G15290	DOWN	Tetratricopeptide repeat (TPR)-like superfamily protein	Tetratricopeptide repeat (TPR)-like superfamily protein; FUNCTIONS IN: binding; INVOLVED IN: biological_process unknown; LOCATED IN: cellular_component unknown; EXPRESSED IN: 24 plant structures; EXPRESSED DURING: 13 growth stages; CONTAINS InterPro DOMAIN/s: Tetratricopeptide-like helical (InterPro:IPR011990), Tetratricopeptide repeat-containing (InterPro:IPR013026), Tetratricopeptide repeat (In…	Clustered mitochondria protein, N-terminal | Tetratricopeptide repeat | Tetratricopeptide repeat-containing domain | Tetratricopeptide-like helical domain	NO
AT1G15460	UP	HCO3- transporter family	REQUIRES HIGH BORON 4 (BOR4); CONTAINS InterPro DOMAIN/s: Bicarbonate transporter, eukaryotic (InterPro:IPR003020), Bicarbonate transporter, C-terminal (InterPro:IPR011531); BEST Arabidopsis thaliana protein match is: HCO3- transporter family (TAIR:AT1G74810.1)	Bicarbonate transporter, C-terminal | Bicarbonate transporter, eukaryotic	NO
AT1G16410	UP	cytochrome p450 79f1	cytochrome p450 79f1 (CYP79F1); CONTAINS InterPro DOMAIN/s: Cytochrome P450 (InterPro:IPR001128), Cytochrome P450, E-class, group I (InterPro:IPR002401); CONTAINS InterPro DOMAIN/s: Cytochrome P450 (InterPro:IPR001128), Cytochrome P450, conserved site (InterPro:IPR017972), Cytochrome P450, E-class, group I (InterPro:IPR002401); BEST Arabidopsis thaliana protein match is: cytochrome P450, family 7…	Cytochrome P450 | Cytochrome P450, E-class, group I | Cytochrome P450, conserved site	NO
AT1G16850	UP		unknown protein; FUNCTIONS IN: molecular_function unknown; INVOLVED IN: response to salt stress; LOCATED IN: endomembrane system; EXPRESSED IN: leaf apex, leaf whorl, male gametophyte, flower, leaf; EXPRESSED DURING: LP.06 six leaves visible, LP.04 four leaves visible, LP.10 ten leaves visible, petal differentiation and expansion stage, LP.08 eight leaves visible; BEST Arabidopsis thaliana protei…		NO
AT1G17100	UP	SOUL heme-binding family protein	SOUL heme-binding family protein; FUNCTIONS IN: binding; INVOLVED IN: biological_process unknown; LOCATED IN: plasma membrane, vacuole; EXPRESSED IN: 24 plant structures; EXPRESSED DURING: 14 growth stages; CONTAINS InterPro DOMAIN/s: SOUL haem-binding protein (InterPro:IPR006917); BEST Arabidopsis thaliana protein match is: SOUL heme-binding family protein (TAIR:AT1G78450.1)	Regulatory factor, effector binding domain | SOUL haem-binding protein	NO
AT1G17345	DOWN	SAUR-like auxin-responsive protein family	SAUR-like auxin-responsive protein family ; CONTAINS InterPro DOMAIN/s: Auxin responsive SAUR protein (InterPro:IPR003676); BEST Arabidopsis thaliana protein match is: SAUR-like auxin-responsive protein family (TAIR:AT1G72430.1)	Auxin-induced protein, ARG7	NO
AT1G17620	DOWN	Late embryogenesis abundant (LEA) hydroxyproline-rich glycoprotein family	Late embryogenesis abundant (LEA) hydroxyproline-rich glycoprotein family; FUNCTIONS IN: molecular_function unknown; INVOLVED IN: biological_process unknown; LOCATED IN: plasma membrane; EXPRESSED IN: 23 plant structures; EXPRESSED DURING: 13 growth stages; CONTAINS InterPro DOMAIN/s: Late embryogenesis abundant protein, group 2 (InterPro:IPR004864); BEST Arabidopsis thaliana protein match is: un…	Late embryogenesis abundant protein, LEA-14	NO
AT1G17860	UP	Kunitz family trypsin and protease inhibitor protein	Kunitz family trypsin and protease inhibitor protein; FUNCTIONS IN: endopeptidase inhibitor activity; INVOLVED IN: biological_process unknown; LOCATED IN: apoplast, cell wall; EXPRESSED IN: 17 plant structures; EXPRESSED DURING: 13 growth stages; CONTAINS InterPro DOMAIN/s: Proteinase inhibitor I3, Kunitz legume (InterPro:IPR002160), Kunitz inhibitor ST1-like (InterPro:IPR011065); BEST Arabidopsi…	Kunitz inhibitor ST1-like | Proteinase inhibitor I3, Kunitz legume	NO
AT1G17970	DOWN	RING/U-box superfamily protein	RING/U-box superfamily protein; FUNCTIONS IN: zinc ion binding; EXPRESSED IN: 20 plant structures; EXPRESSED DURING: 13 growth stages; CONTAINS InterPro DOMAIN/s: Zinc finger, RING-type (InterPro:IPR001841), Zinc finger, C3HC4 RING-type (InterPro:IPR018957); BEST Arabidopsis thaliana protein match is: RING/U-box superfamily protein (TAIR:AT1G73760.1)	Zinc finger, RING-type | Zinc finger, RING/FYVE/PHD-type	NO
AT1G18020	DOWN	FMN-linked oxidoreductases superfamily protein	FMN-linked oxidoreductases superfamily protein; FUNCTIONS IN: oxidoreductase activity, FMN binding, catalytic activity; INVOLVED IN: metabolic process; CONTAINS InterPro DOMAIN/s: NADH:flavin oxidoreductase/NADH oxidase, N-terminal (InterPro:IPR001155), Aldolase-type TIM barrel (InterPro:IPR013785); BEST Arabidopsis thaliana protein match is: FMN-linked oxidoreductases superfamily protein (TAIR:A…	Aldolase-type TIM barrel | NADH:flavin oxidoreductase/NADH oxidase, N-terminal	NO
AT1G18180	UP	Protein of unknown function (DUF1295)	FUNCTIONS IN: oxidoreductase activity, acting on the CH-CH group of donors; INVOLVED IN: lipid metabolic process; LOCATED IN: plasma membrane; EXPRESSED IN: 21 plant structures; EXPRESSED DURING: 9 growth stages; CONTAINS InterPro DOMAIN/s: 3-oxo-5-alpha-steroid 4-dehydrogenase, C-terminal (InterPro:IPR001104), Protein of unknown function DUF1295 (InterPro:IPR010721); BEST Arabidopsis thaliana pr…	3-oxo-5-alpha-steroid 4-dehydrogenase, C-terminal | Protein of unknown function DUF1295	NO
AT1G18570	UP	myb domain protein 51	myb domain protein 51 (MYB51); CONTAINS InterPro DOMAIN/s: SANT, DNA-binding (InterPro:IPR001005), Homeodomain-like (InterPro:IPR009057), Myb, DNA-binding (InterPro:IPR014778), HTH transcriptional regulator, Myb-type, DNA-binding (InterPro:IPR017930), Homeodomain-related (InterPro:IPR012287), Myb transcription factor (InterPro:IPR015495); BEST Arabidopsis thaliana protein match is: myb domain pro…	Homeodomain-like | Myb domain | SANT/Myb domain	NO
AT1G19050	DOWN	response regulator 7	response regulator 7 (ARR7); CONTAINS InterPro DOMAIN/s: CheY-like (InterPro:IPR011006), Signal transduction response regulator, receiver domain (InterPro:IPR001789); BEST Arabidopsis thaliana protein match is: response regulator 15 (TAIR:AT1G74890.1)	CheY-like superfamily | Signal transduction response regulator, receiver domain	NO
AT1G19380	UP	Protein of unknown function (DUF1195)	Protein of unknown function (DUF1195); CONTAINS InterPro DOMAIN/s: Protein of unknown function DUF1195 (InterPro:IPR010608); BEST Arabidopsis thaliana protein match is: Protein of unknown function (DUF1195) (TAIR:AT4G36660.1)	Protein of unknown function DUF1195	NO
AT1G19510	UP	RAD-like 5	RAD-like 5 (RL5); FUNCTIONS IN: DNA binding, sequence-specific DNA binding transcription factor activity; INVOLVED IN: regulation of transcription, DNA-dependent; EXPRESSED IN: 11 plant structures; EXPRESSED DURING: 9 growth stages; CONTAINS InterPro DOMAIN/s: SANT, DNA-binding (InterPro:IPR001005), Molecular chaperone, heat shock protein, Hsp40, DnaJ (InterPro:IPR015609), Homeodomain-like (Inter…	Homeodomain-like | Myb-like domain | SANT/Myb domain	NO
AT1G19540	DOWN	NmrA-like negative transcriptional regulator family protein	NmrA-like negative transcriptional regulator family protein; FUNCTIONS IN: binding, catalytic activity; INVOLVED IN: metabolic process; LOCATED IN: cellular_component unknown; EXPRESSED IN: 18 plant structures; EXPRESSED DURING: 11 growth stages; CONTAINS InterPro DOMAIN/s: NAD(P)-binding domain (InterPro:IPR016040), NmrA-like (InterPro:IPR008030); BEST Arabidopsis thaliana protein match is: NmrA…	NAD(P)-binding domain | NmrA-like domain	NO
AT1G19610	UP	Arabidopsis defensin-like protein	PDF1.4; FUNCTIONS IN: molecular_function unknown; INVOLVED IN: defense response; LOCATED IN: endomembrane system; EXPRESSED IN: 13 plant structures; EXPRESSED DURING: 9 growth stages; CONTAINS InterPro DOMAIN/s: Gamma thionin (InterPro:IPR008176), Low-molecular-weight cysteine-rich family (InterPro:IPR020191), Knottin (InterPro:IPR003614); BEST Arabidopsis thaliana protein match is: plant defensi…	Gamma thionin | Knottin, scorpion toxin-like | Low-molecular-weight cysteine-rich family	NO
AT1G19960	UP		BEST Arabidopsis thaliana protein match is: transmembrane receptors (TAIR:AT2G32140.1)		NO
AT1G20020	DOWN	ferredoxin-NADP(+)-oxidoreductase 2	LEAF FNR 2 (ATLFNR2); ferredoxin-NADP(+)-oxidoreductase 2 (FNR2); FUNCTIONS IN: oxidoreductase activity, poly(U) RNA binding, NADPH dehydrogenase activity; INVOLVED IN: oxidation reduction, defense response to fungus, incompatible interaction, defense response to bacterium; LOCATED IN: thylakoid, chloroplast thylakoid membrane, apoplast, chloroplast stroma, chloroplast; EXPRESSED IN: 22 plant str…	Ferredoxin reductase-type FAD-binding domain | Ferredoxin--NADP reductase | Flavoprotein pyridine nucleotide cytochrome reductase | Oxidoreductase FAD/NAD(P)-binding | Oxidoreductase, FAD-binding domain | Riboflavin synthase-like beta-barrel	NO
AT1G20070	UP		unknown protein; FUNCTIONS IN: molecular_function unknown; INVOLVED IN: biological_process unknown; LOCATED IN: chloroplast; EXPRESSED IN: 20 plant structures; EXPRESSED DURING: 11 growth stages		NO
AT1G20330	DOWN	sterol methyltransferase 2	sterol methyltransferase 2 (SMT2); FUNCTIONS IN: S-adenosylmethionine-dependent methyltransferase activity; INVOLVED IN: xylem and phloem pattern formation, negative regulation of DNA endoreduplication, multidimensional cell growth, sterol biosynthetic process, pattern specification process; LOCATED IN: endoplasmic reticulum; EXPRESSED IN: 30 plant structures; EXPRESSED DURING: 14 growth stages; …	ERGosterol biosynthesis methyltransferase, plant | Methyltransferase type 11 | S-adenosyl-L-methionine-dependent methyltransferase-like | Sterol methyltransferase C-terminal	NO
AT1G21250	UP	cell wall-associated kinase	cell wall-associated kinase (WAK1); FUNCTIONS IN: kinase activity; INVOLVED IN: cell surface receptor linked signaling pathway, response to virus, defense response to fungus, response to salicylic acid stimulus; LOCATED IN: plasma membrane, vacuole, plant-type cell wall; EXPRESSED IN: 21 plant structures; EXPRESSED DURING: 13 growth stages; CONTAINS InterPro DOMAIN/s: EGF-like calcium-binding (In…	Concanavalin A-like lectin/glucanase, subgroup | EGF-like calcium-binding domain | EGF-like calcium-binding, conserved site | EGF-type aspartate/asparagine hydroxylation site | Epidermal growth factor-like domain | Protein kinase domain | Protein kinase-like domain | Serine/threonine-protein kinase, active site | Wall-associated receptor kinase galacturonan-binding domain	NO
AT1G21310	UP	extensin 3	extensin 3 (EXT3); FUNCTIONS IN: structural constituent of cell wall; INVOLVED IN: plant-type cell wall organization; LOCATED IN: endomembrane system; EXPRESSED IN: 7 plant structures; EXPRESSED DURING: 4 anthesis, F mature embryo stage, petal differentiation and expansion stage, E expanded cotyledon stage, D bilateral stage; CONTAINS InterPro DOMAIN/s: Extensin-like repeat (InterPro:IPR006706); …		NO
AT1G21400	DOWN	Thiamin diphosphate-binding fold (THDP-binding) superfamily protein	Thiamin diphosphate-binding fold (THDP-binding) superfamily protein; FUNCTIONS IN: oxidoreductase activity, acting on the aldehyde or oxo group of donors, disulfide as acceptor, 3-methyl-2-oxobutanoate dehydrogenase (2-methylpropanoyl-transferring) activity; INVOLVED IN: metabolic process; EXPRESSED IN: guard cell; CONTAINS InterPro DOMAIN/s: Dehydrogenase, E1 component (InterPro:IPR001017); BEST…		NO
AT1G21460	UP	Nodulin MtN3 family protein	Nodulin MtN3 family protein; INVOLVED IN: biological_process unknown; LOCATED IN: endomembrane system, integral to membrane, membrane; EXPRESSED IN: 24 plant structures; EXPRESSED DURING: 14 growth stages; CONTAINS InterPro DOMAIN/s: MtN3/saliva-related transmembrane protein, conserved region (InterPro:IPR018169), RAG1-activating protein 1 homologue (InterPro:IPR018179), RAG1-activating protein-1…		YES	1:7511961:G-A;exonic_variant
AT1G21670	DOWN		LOCATED IN: cell wall, plant-type cell wall; EXPRESSED IN: 23 plant structures; EXPRESSED DURING: 14 growth stages; CONTAINS InterPro DOMAIN/s: WD40-like Beta Propeller (InterPro:IPR011659), Six-bladed beta-propeller, TolB-like (InterPro:IPR011042); BEST Arabidopsis thaliana protein match is: DPP6 N-terminal domain-like protein (TAIR:AT1G21680.1)	WD40-like Beta Propeller | WD40/YVTN repeat-like-containing domain	NO
AT1G21680	DOWN	DPP6 N-terminal domain-like protein	DPP6 N-terminal domain-like protein; FUNCTIONS IN: molecular_function unknown; INVOLVED IN: biological_process unknown; LOCATED IN: plasma membrane, vacuole, plant-type cell wall; EXPRESSED IN: 25 plant structures; EXPRESSED DURING: 13 growth stages; CONTAINS InterPro DOMAIN/s: WD40-like Beta Propeller (InterPro:IPR011659), Six-bladed beta-propeller, TolB-like (InterPro:IPR011042); BEST Arabidops…	WD40-like Beta Propeller | WD40/YVTN repeat-like-containing domain	NO
AT1G21910	DOWN	Integrase-type DNA-binding superfamily protein	Integrase-type DNA-binding superfamily protein; FUNCTIONS IN: DNA binding, sequence-specific DNA binding transcription factor activity; INVOLVED IN: regulation of transcription, DNA-dependent; LOCATED IN: nucleus, chloroplast; EXPRESSED IN: 22 plant structures; EXPRESSED DURING: 13 growth stages; CONTAINS InterPro DOMAIN/s: DNA-binding, integrase-type (InterPro:IPR016177), Pathogenesis-related tr…	AP2/ERF domain | DNA-binding domain	NO
AT1G22330	DOWN	RNA-binding (RRM/RBD/RNP motifs) family protein	RNA-binding (RRM/RBD/RNP motifs) family protein; FUNCTIONS IN: RNA binding, nucleotide binding, nucleic acid binding; INVOLVED IN: biological_process unknown; LOCATED IN: cellular_component unknown; EXPRESSED IN: 20 plant structures; EXPRESSED DURING: 13 growth stages; CONTAINS InterPro DOMAIN/s: RNA recognition motif, RNP-1 (InterPro:IPR000504), Nucleotide-binding, alpha-beta plait (InterPro:IPR…	Nucleotide-binding, alpha-beta plait | RNA recognition motif domain	NO
AT1G22530	DOWN	PATELLIN 2	PATELLIN 2 (PATL2); FUNCTIONS IN: transporter activity; INVOLVED IN: transport; LOCATED IN: plasma membrane, chloroplast; EXPRESSED IN: 25 plant structures; EXPRESSED DURING: 14 growth stages; CONTAINS InterPro DOMAIN/s: Cellular retinaldehyde-binding/triple function, C-terminal (InterPro:IPR001251), Cellular retinaldehyde-binding/triple function, N-terminal (InterPro:IPR008273), Cellular retinal…	CRAL-TRIO domain | CRAL/TRIO, N-terminal domain | Cellular retinaldehyde binding/alpha-tocopherol transport | GOLD	NO
AT1G22882	DOWN	Galactose-binding protein	Galactose-binding protein; FUNCTIONS IN: molecular_function unknown; INVOLVED IN: biological_process unknown; LOCATED IN: mitochondrion; CONTAINS InterPro DOMAIN/s: Sad1/UNC-like, C-terminal (InterPro:IPR012919), Galactose-binding domain-like (InterPro:IPR008979); BEST Arabidopsis thaliana protein match is: Galactose-binding protein (TAIR:AT1G71360.1)	Galactose-binding domain-like | Sad1/UNC-like, C-terminal	NO
AT1G22890	UP		unknown protein; FUNCTIONS IN: molecular_function unknown; INVOLVED IN: biological_process unknown; LOCATED IN: endomembrane system; EXPRESSED IN: 19 plant structures; EXPRESSED DURING: 11 growth stages		NO
AT1G23030	DOWN	ARM repeat superfamily protein	ARM repeat superfamily protein; FUNCTIONS IN: ubiquitin-protein ligase activity, binding; INVOLVED IN: response to chitin; LOCATED IN: ubiquitin ligase complex; EXPRESSED IN: 23 plant structures; EXPRESSED DURING: 15 growth stages; CONTAINS InterPro DOMAIN/s: U box domain (InterPro:IPR003613), Armadillo-like helical (InterPro:IPR011989), Armadillo (InterPro:IPR000225), Armadillo-type fold (InterP…	Armadillo | Armadillo-like helical | Armadillo-type fold | U box domain | Zinc finger, RING/FYVE/PHD-type	NO
AT1G23480	DOWN	cellulose synthase-like A3	cellulose synthase-like A3 (CSLA03); FUNCTIONS IN: cellulose synthase activity, transferase activity, transferring glycosyl groups; INVOLVED IN: biological_process unknown; LOCATED IN: endomembrane system; EXPRESSED IN: 19 plant structures; EXPRESSED DURING: 10 growth stages; CONTAINS InterPro DOMAIN/s: Glycosyl transferase, family 2 (InterPro:IPR001173); BEST Arabidopsis thaliana protein match i…	Nucleotide-diphospho-sugar transferases	YES	1:8334414:G-A;splice_donor_region_variant
AT1G23870	DOWN	trehalose-phosphatase/synthase 9	trehalose-phosphatase/synthase 9 (TPS9); FUNCTIONS IN: transferase activity, transferring glycosyl groups, trehalose-phosphatase activity; INVOLVED IN: trehalose biosynthetic process, metabolic process; EXPRESSED IN: 27 plant structures; EXPRESSED DURING: 15 growth stages; CONTAINS InterPro DOMAIN/s: HAD-superfamily hydrolase, subfamily IIB (InterPro:IPR006379), Glycosyl transferase, family 20 (I…	Glycosyl transferase, family 20 | HAD-like domain | HAD-superfamily hydrolase, subfamily IIB | Trehalose-phosphatase	NO
AT1G24090	UP	RNase H family protein	RNase H family protein; FUNCTIONS IN: ribonuclease H activity, nucleic acid binding; INVOLVED IN: biological_process unknown; EXPRESSED IN: 11 plant structures; EXPRESSED DURING: 6 growth stages; CONTAINS InterPro DOMAIN/s: Ribosomal protein L9/RNase H1, N-terminal (InterPro:IPR009027), Polynucleotidyl transferase, ribonuclease H fold (InterPro:IPR012337), Ribonuclease H (InterPro:IPR002156); BES…	Ribonuclease H domain | Ribonuclease H-like domain | Ribonuclease H1, N-terminal | Ribosomal protein L9/RNase H1, N-terminal	NO
AT1G24170	DOWN	Nucleotide-diphospho-sugar transferases superfamily protein	LGT9; FUNCTIONS IN: transferase activity, transferring hexosyl groups, polygalacturonate 4-alpha-galacturonosyltransferase activity, transferase activity, transferring glycosyl groups; INVOLVED IN: carbohydrate biosynthetic process; LOCATED IN: endomembrane system; EXPRESSED IN: 23 plant structures; EXPRESSED DURING: 13 growth stages; CONTAINS InterPro DOMAIN/s: Glycosyl transferase, family 8 (In…	Glycosyl transferase, family 8 | Nucleotide-diphospho-sugar transferases	NO
AT1G24260	DOWN	K-box region and MADS-box transcription factor family protein	SEPALLATA3 (SEP3); CONTAINS InterPro DOMAIN/s: Transcription factor, MADS-box (InterPro:IPR002100), Transcription factor, K-box (InterPro:IPR002487); FUNCTIONS IN: protein binding, DNA binding, sequence-specific DNA binding transcription factor activity; BEST Arabidopsis thaliana protein match is: K-box region and MADS-box transcription factor family protein (TAIR:AT3G02310.1); INVOLVED IN: in 6 …	Transcription factor, K-box | Transcription factor, MADS-box	NO
AT1G26558	UP	other RNA			NO
AT1G26840	UP	origin recognition complex protein 6	origin recognition complex protein 6 (ORC6); FUNCTIONS IN: DNA binding; INVOLVED IN: DNA replication; LOCATED IN: origin recognition complex; EXPRESSED IN: 17 plant structures; EXPRESSED DURING: 9 growth stages; CONTAINS InterPro DOMAIN/s: Origin recognition complex, subunit 6, metazoa/plant (InterPro:IPR020529), Origin recognition complex, subunit 6 (InterPro:IPR008721)	Origin recognition complex, subunit 6 | Origin recognition complex, subunit 6, metazoa/plant	NO
AT1G27030	UP		unknown protein; BEST Arabidopsis thaliana protein match is: unknown protein (TAIR:AT1G27020.1)	Domain of unknown function DUF1338	YES	1:9383584:GT-G;intronic_variant,1:9383536:T-TA;intronic_variant
AT1G27045	UP	Homeobox-leucine zipper protein family	Homeobox-leucine zipper protein family; FUNCTIONS IN: sequence-specific DNA binding, transcription regulator activity, DNA binding, sequence-specific DNA binding transcription factor activity; INVOLVED IN: regulation of transcription, DNA-dependent, regulation of transcription; LOCATED IN: nucleus; CONTAINS InterPro DOMAIN/s: Homeobox (InterPro:IPR001356), Homeobox, conserved site (InterPro:IPR01…	Helix-turn-helix motif | Homeobox domain | Homeobox, conserved site | Homeodomain-like | Leucine zipper, homeobox-associated	NO
AT1G27510	DOWN	Protein of unknown function (DUF3506)	FUNCTIONS IN: DNA binding, nuclease activity; INVOLVED IN: response to singlet oxygen; LOCATED IN: thylakoid membrane; EXPRESSED IN: 22 plant structures; EXPRESSED DURING: 13 growth stages; CONTAINS InterPro DOMAIN/s: Protein of unknown function DUF3506 (InterPro:IPR021894), UvrB/UvrC protein (InterPro:IPR001943); BEST Arabidopsis thaliana protein match is: Protein of unknown function (DUF3506) (…	Protein of unknown function DUF3506 | UVR domain	NO
AT1G28330	DOWN	dormancy-associated protein-like 1	dormancy-associated protein-like 1; dormancy-associated protein-like 1 (DYL1); FUNCTIONS IN: molecular_function unknown; INVOLVED IN: response to fructose stimulus, response to sucrose stimulus, response to glucose stimulus; LOCATED IN: cellular_component unknown; EXPRESSED IN: 22 plant structures; EXPRESSED DURING: 13 growth stages; CONTAINS InterPro DOMAIN/s: Dormancyauxin associated (InterPro:…	Dormancyauxin associated	NO
AT1G28580	DOWN	GDSL-like Lipase/Acylhydrolase superfamily protein	GDSL-like Lipase/Acylhydrolase superfamily protein; FUNCTIONS IN: lipase activity, hydrolase activity, acting on ester bonds, carboxylesterase activity; INVOLVED IN: lipid metabolic process; LOCATED IN: vacuole; EXPRESSED IN: 22 plant structures; EXPRESSED DURING: 13 growth stages; CONTAINS InterPro DOMAIN/s: Lipase, GDSL (InterPro:IPR001087); BEST Arabidopsis thaliana protein match is: SGNH hydr…	Lipase, GDSL | SGNH hydrolase-type esterase domain	NO
AT1G28670	DOWN	GDSL-like Lipase/Acylhydrolase superfamily protein	ARAB-1; FUNCTIONS IN: hydrolase activity, acting on ester bonds, carboxylesterase activity; INVOLVED IN: glycerol biosynthetic process, lipid metabolic process; LOCATED IN: endomembrane system; CONTAINS InterPro DOMAIN/s: Lipase, GDSL (InterPro:IPR001087); BEST Arabidopsis thaliana protein match is: GDSL-like Lipase/Acylhydrolase superfamily protein (TAIR:AT1G28660.1)	Lipase, GDSL | SGNH hydrolase-type esterase domain	NO
AT1G29195	UP		unknown protein; FUNCTIONS IN: molecular_function unknown; INVOLVED IN: biological_process unknown; LOCATED IN: chloroplast; EXPRESSED IN: 13 plant structures; EXPRESSED DURING: 4 anthesis, C globular stage, 4 leaf senescence stage, petal differentiation and expansion stage; BEST Arabidopsis thaliana protein match is: unknown protein (TAIR:AT2G30230.1)	Protein of unknown function DUF4228, plant	NO
AT1G30140	UP		unknown protein; BEST Arabidopsis thaliana protein match is: unknown protein (TAIR:AT5G27260.1)	Myb/SANT-like domain	NO
AT1G30320	DOWN	Remorin family protein	Remorin family protein; FUNCTIONS IN: DNA binding; LOCATED IN: plasma membrane; CONTAINS InterPro DOMAIN/s: Remorin, C-terminal (InterPro:IPR005516); BEST Arabidopsis thaliana protein match is: Remorin family protein (TAIR:AT2G02170.2)	Remorin, C-terminal	NO
AT1G30360	DOWN	Early-responsive to dehydration stress protein (ERD4)	early-responsive to dehydration 4 (ERD4); INVOLVED IN: response to water deprivation; LOCATED IN: plasma membrane, chloroplast, vacuole, membrane, chloroplast envelope; EXPRESSED IN: 26 plant structures; EXPRESSED DURING: 14 growth stages; CONTAINS InterPro DOMAIN/s: Protein of unknown function DUF221 (InterPro:IPR003864); BEST Arabidopsis thaliana protein match is: ERD (early-responsive to dehyd…	Domain of unknown function DUF221 | Domain of unknown function DUF4463	NO
AT1G30530	UP	UDP-glucosyl transferase 78D1	UDP-glucosyl transferase 78D1 (UGT78D1); CONTAINS InterPro DOMAIN/s: UDP-glucuronosyl/UDP-glucosyltransferase (InterPro:IPR002213); BEST Arabidopsis thaliana protein match is: UDP-glucosyl transferase 78D2 (TAIR:AT5G17050.1)	UDP-glucuronosyl/UDP-glucosyltransferase	NO
AT1G30590	DOWN	RNA polymerase I specific transcription initiation factor RRN3 protein	RNA polymerase I specific transcription initiation factor RRN3 protein; CONTAINS InterPro DOMAIN/s: RNA polymerase I specific transcription initiation factor RRN3 (InterPro:IPR007991); BEST Arabidopsis thaliana protein match is: RNA polymerase I specific transcription initiation factor RRN3 protein (TAIR:AT2G34750.1)	RNA polymerase I specific transcription initiation factor RRN3	NO
AT1G31570	UP	transposable element gene	CACTA-like transposase family (Tnp2/En/Spm), has a 0. P-value blast match to gb|AAG52024.1|AC022456_5 Tam1-homologous transposon protein TNP2, putative; 12762-16371 (Arabidopsis thaliana) (CACTA-element)		NO
AT1G31580	UP	ECS1	ECS1		NO
AT1G31690	UP	Copper amine oxidase family protein	Copper amine oxidase family protein; FUNCTIONS IN: quinone binding, primary amine oxidase activity, copper ion binding; INVOLVED IN: oxidation reduction, amine metabolic process; LOCATED IN: endomembrane system; EXPRESSED IN: 9 plant structures; EXPRESSED DURING: 7 growth stages; CONTAINS InterPro DOMAIN/s: Copper amine oxidase, N-terminal (InterPro:IPR016182), Copper amine oxidase, N2/N3-termina…	Copper amine oxidase | Copper amine oxidase, C-terminal | Copper amine oxidase, N-terminal | Copper amine oxidase, N2-terminal | Copper amine oxidase, N2/N3-terminal | Copper amine oxidase, N3-terminal	NO
AT1G32350	UP	alternative oxidase 1D	alternative oxidase 1D (AOX1D); FUNCTIONS IN: alternative oxidase activity; INVOLVED IN: oxidation reduction, response to cyclopentenone; LOCATED IN: mitochondrial envelope, mitochondrion; EXPRESSED IN: stem, sepal, leaf, stamen; EXPRESSED DURING: LP.04 four leaves visible, 4 anthesis, petal differentiation and expansion stage; CONTAINS InterPro DOMAIN/s: Alternative oxidase (InterPro:IPR002680);…	Alternative oxidase	NO
AT1G32520	DOWN		unknown protein; FUNCTIONS IN: molecular_function unknown; INVOLVED IN: biological_process unknown; LOCATED IN: chloroplast; EXPRESSED IN: 24 plant structures; EXPRESSED DURING: 15 growth stages	TLDc domain	NO
AT1G32920	UP		unknown protein; FUNCTIONS IN: molecular_function unknown; INVOLVED IN: response to wounding; LOCATED IN: endomembrane system; EXPRESSED IN: 23 plant structures; EXPRESSED DURING: 13 growth stages; BEST Arabidopsis thaliana protein match is: unknown protein (TAIR:AT1G32928.1)		NO
AT1G33590	UP	Leucine-rich repeat (LRR) family protein	Leucine-rich repeat (LRR) family protein; INVOLVED IN: signal transduction, response to karrikin, defense response; LOCATED IN: cell wall, chloroplast, plant-type cell wall; EXPRESSED IN: 22 plant structures; EXPRESSED DURING: 14 growth stages; CONTAINS InterPro DOMAIN/s: Leucine-rich repeat, typical subtype (InterPro:IPR003591), Leucine-rich repeat-containing N-terminal domain, type 2 (InterPro:…		NO
AT1G33720	UP	cytochrome P450, family 76, subfamily C, polypeptide 6	cytochrome P450, family 76, subfamily C, polypeptide 6 (CYP76C6); FUNCTIONS IN: electron carrier activity, monooxygenase activity, iron ion binding, oxygen binding, heme binding; INVOLVED IN: oxidation reduction; LOCATED IN: endomembrane system; CONTAINS InterPro DOMAIN/s: Cytochrome P450 (InterPro:IPR001128), Cytochrome P450, E-class, group I (InterPro:IPR002401), Cytochrome P450, conserved site…	Cytochrome P450 | Cytochrome P450, E-class, group I | Cytochrome P450, conserved site	NO
AT1G33790	DOWN	jacalin lectin family protein	jacalin lectin family protein; INVOLVED IN: biological_process unknown; EXPRESSED IN: 7 plant structures; LOCATED IN: chloroplast; EXPRESSED DURING: F mature embryo stage, petal differentiation and expansion stage, E expanded cotyledon stage, D bilateral stage; CONTAINS InterPro DOMAIN/s: Mannose-binding lectin (InterPro:IPR001229); BEST Arabidopsis thaliana protein match is: Mannose-binding lect…	Mannose-binding lectin	NO
AT1G34140	DOWN	poly(A) binding protein 1	poly(A) binding protein 1 (PAB1); CONTAINS InterPro DOMAIN/s: RNA recognition motif, RNP-1 (InterPro:IPR000504), Nucleotide-binding, alpha-beta plait (InterPro:IPR012677), RNA recognition, domain 1 (InterPro:IPR003954); BEST Arabidopsis thaliana protein match is: poly(A)-binding protein 5 (TAIR:AT1G71770.2)		NO
AT1G34210	DOWN	somatic embryogenesis receptor-like kinase 2	somatic embryogenesis receptor-like kinase 2 (SERK2); FUNCTIONS IN: kinase activity; INVOLVED IN: pollen maturation, microsporogenesis; LOCATED IN: plasma membrane; EXPRESSED IN: 23 plant structures; EXPRESSED DURING: 14 growth stages; CONTAINS InterPro DOMAIN/s: Protein kinase, ATP binding site (InterPro:IPR017441), Protein kinase, catalytic domain (InterPro:IPR000719), Leucine-rich repeat-conta…	Concanavalin A-like lectin/glucanase, subgroup | Leucine-rich repeat | Leucine-rich repeat-containing N-terminal, type 2 | Protein kinase domain | Protein kinase, ATP binding site | Protein kinase-like domain | Serine-threonine/tyrosine-protein kinase catalytic domain | Serine/threonine-protein kinase, active site	NO
AT1G35140	DOWN	Phosphate-responsive 1 family protein	PHOSPHATE-INDUCED 1 (PHI-1); CONTAINS InterPro DOMAIN/s: Phosphate-induced protein 1 (InterPro:IPR006766); BEST Arabidopsis thaliana protein match is: Phosphate-responsive 1 family protein (TAIR:AT4G08950.1)	Phosphate-induced protein 1	NO
AT1G35612	DOWN	transposable element gene	expressed protein		NO
AT1G35710	UP	Protein kinase family protein with leucine-rich repeat domain	Protein kinase family protein with leucine-rich repeat domain; FUNCTIONS IN: protein serine/threonine kinase activity, protein tyrosine kinase activity, protein kinase activity, ATP binding; INVOLVED IN: transmembrane receptor protein tyrosine kinase signaling pathway, protein amino acid phosphorylation; LOCATED IN: endomembrane system; EXPRESSED IN: 22 plant structures; EXPRESSED DURING: 13 grow…	Concanavalin A-like lectin/glucanase, subgroup | Leucine-rich repeat | Leucine-rich repeat, typical subtype | Leucine-rich repeat-containing N-terminal, type 2 | Protein kinase domain | Protein kinase, ATP binding site | Protein kinase-like domain | Tyrosine-protein kinase, active site	YES	1:13224690:G-GA;exonic_variant
AT1G35720	UP	annexin 1	annexin 1 (ANNAT1); FUNCTIONS IN: in 7 functions; INVOLVED IN: in 8 processes; LOCATED IN: in 10 components; EXPRESSED IN: 31 plant structures; EXPRESSED DURING: 16 growth stages; CONTAINS InterPro DOMAIN/s: Annexin like protein (InterPro:IPR015472), Annexin repeat (InterPro:IPR018502), Annexin repeat, conserved site (InterPro:IPR018252), Annexin (InterPro:IPR001464), Annexin, type plant (InterPr…	Annexin | Annexin repeat | Annexin repeat, conserved site | Annexin, plant	NO
AT1G36330	DOWN	transposable element gene	gypsy-like retrotransposon family, has a 1.1e-71 P-value blast match to GB:AAD27547 polyprotein (Gypsy_Ty3-element) (Oryza sativa subsp. indica)		NO
AT1G36630	UP	transposable element gene	CACTA-like transposase family (Tnp1/En/Spm), has a 2.5e-213 P-value blast match to ref|NP_189784.1| TNP1-related protein (Arabidopsis thaliana) (CACTA-element)		YES	1:13841967:C-T;exonic_variant,1:13841560:T-C;exonic_variant,1:13841603:G-C;exonic_variant,1:13841632:C-T;exonic_variant,1:13841558:A-G;exonic_variant,1:13841803:A-G;exonic_variant,1:13840979:C-T;exonic_variant,1:13841593:C-T;exonic_variant,1:13841464:A-G;exonic_variant,1:13841484:T-TAATTCG;exonic_variant,1:13841286:C-T;exonic_variant,1:13841991:T-G;exonic_variant,1:13841260:G-GAT;exonic_variant,1…
AT1G42560	DOWN	Seven transmembrane MLO family protein	MILDEW RESISTANCE LOCUS O 9 (MLO9); FUNCTIONS IN: calmodulin binding; INVOLVED IN: cell death, defense response; LOCATED IN: integral to membrane, plasma membrane; EXPRESSED IN: 8 plant structures; EXPRESSED DURING: 4 anthesis, petal differentiation and expansion stage; CONTAINS InterPro DOMAIN/s: Mlo-related protein (InterPro:IPR004326); BEST Arabidopsis thaliana protein match is: Seven transmem…	Mlo-related protein	YES	1:15982936:A-AAT;intronic_variant
AT1G43650	DOWN	nodulin MtN21 /EamA-like transporter family protein	nodulin MtN21 /EamA-like transporter family protein; LOCATED IN: endomembrane system, membrane; EXPRESSED IN: 10 plant structures; EXPRESSED DURING: 7 growth stages; CONTAINS InterPro DOMAIN/s: Protein of unknown function DUF6, transmembrane (InterPro:IPR000620); BEST Arabidopsis thaliana protein match is: nodulin MtN21 /EamA-like transporter family protein (TAIR:AT1G09380.1); BEST Arabidopsis th…	Drug/metabolite transporter	NO
AT1G43800	UP	Plant stearoyl-acyl-carrier-protein desaturase family protein	Plant stearoyl-acyl-carrier-protein desaturase family protein; FUNCTIONS IN: acyl-[acyl-carrier-protein] desaturase activity, oxidoreductase activity, transition metal ion binding; INVOLVED IN: oxidation reduction, fatty acid metabolic process, fatty acid biosynthetic process; LOCATED IN: membrane; EXPRESSED IN: 9 plant structures; EXPRESSED DURING: 6 growth stages; CONTAINS InterPro DOMAIN/s: Ri…	Fatty acid desaturase, type 2 | Ferritin-like superfamily | Ribonucleotide reductase-related | Stearoyl-ACP desaturase, conserved site	NO
AT1G45201	UP	triacylglycerol lipase-like 1	triacylglycerol lipase-like 1 (TLL1); FUNCTIONS IN: triglyceride lipase activity; INVOLVED IN: circadian rhythm, lipid metabolic process; LOCATED IN: vacuole, membrane; EXPRESSED IN: guard cell, leaf; CONTAINS InterPro DOMAIN/s: Lipase, class 3 (InterPro:IPR002921); BEST Arabidopsis thaliana protein match is: alpha/beta-Hydrolases superfamily protein (TAIR:AT5G42930.1)	Alpha/Beta hydrolase fold | Fungal lipase-like domain	YES	1:17124016:C-T;protein_coding;missense;CCT>CTT;P>L
AT1G47990	DOWN	gibberellin 2-oxidase 4	gibberellin 2-oxidase 4 (GA2OX4); FUNCTIONS IN: C-19 gibberellin 2-beta-dioxygenase activity; INVOLVED IN: gibberellin catabolic process; LOCATED IN: membrane; EXPRESSED IN: shoot apical meristem, leaf primordium, leaf; CONTAINS InterPro DOMAIN/s: Isopenicillin N synthase (InterPro:IPR002283), Oxoglutarate/iron-dependent oxygenase (InterPro:IPR005123); BEST Arabidopsis thaliana protein match is: …		NO
AT1G48470	UP	glutamine synthetase 1;5	glutamine synthetase 1;5 (GLN1;5); FUNCTIONS IN: glutamate-ammonia ligase activity; INVOLVED IN: nitrogen compound metabolic process, glutamine biosynthetic process; LOCATED IN: chloroplast; EXPRESSED IN: 10 plant structures; EXPRESSED DURING: L mature pollen stage, 4 anthesis, petal differentiation and expansion stage, E expanded cotyledon stage; CONTAINS InterPro DOMAIN/s: Glutamine synthetase,…	Glutamine synthetase, N-terminal conserved site | Glutamine synthetase, beta-Grasp | Glutamine synthetase, catalytic domain | Glutamine synthetase, glycine-rich site | Glutamine synthetase/guanido kinase, catalytic domain	NO
AT1G49320	DOWN	unknown seed protein like 1	unknown seed protein like 1 (USPL1); CONTAINS InterPro DOMAIN/s: BURP (InterPro:IPR004873); BEST Arabidopsis thaliana protein match is: BURP domain-containing protein (TAIR:AT5G25610.1)	BURP domain	NO
AT1G49750	UP	Leucine-rich repeat (LRR) family protein	Leucine-rich repeat (LRR) family protein; LOCATED IN: chloroplast; EXPRESSED IN: 22 plant structures; EXPRESSED DURING: 13 growth stages; CONTAINS InterPro DOMAIN/s: Leucine-rich repeat (InterPro:IPR001611); BEST Arabidopsis thaliana protein match is: Leucine-rich repeat (LRR) family protein (TAIR:AT3G19320.1)	Leucine-rich repeat	NO
AT1G50040	DOWN	Protein of unknown function (DUF1005)	Protein of unknown function (DUF1005); FUNCTIONS IN: molecular_function unknown; INVOLVED IN: biological_process unknown; LOCATED IN: chloroplast; EXPRESSED IN: leaf apex, leaf whorl, root, petiole, leaf; EXPRESSED DURING: LP.06 six leaves visible, LP.04 four leaves visible, LP.10 ten leaves visible, LP.08 eight leaves visible, LP.12 twelve leaves visible; CONTAINS InterPro DOMAIN/s: Protein of u…	Protein of unknown function DUF1005	NO
AT1G51940	DOWN	protein kinase family protein / peptidoglycan-binding LysM domain-containing protein	protein kinase family protein / peptidoglycan-binding LysM domain-containing protein; FUNCTIONS IN: kinase activity; INVOLVED IN: protein amino acid phosphorylation, cell wall macromolecule catabolic process; LOCATED IN: endomembrane system; EXPRESSED IN: 22 plant structures; EXPRESSED DURING: 13 growth stages; CONTAINS InterPro DOMAIN/s: Protein kinase, ATP binding site (InterPro:IPR017441), Pep…	Concanavalin A-like lectin/glucanase, subgroup | LysM domain | Protein kinase domain | Protein kinase, ATP binding site | Protein kinase-like domain | Serine-threonine/tyrosine-protein kinase catalytic domain | Serine/threonine-protein kinase, active site	NO
AT1G52000	UP	Mannose-binding lectin superfamily protein	Mannose-binding lectin superfamily protein; FUNCTIONS IN: molecular_function unknown; INVOLVED IN: response to salt stress; LOCATED IN: cellular_component unknown; EXPRESSED IN: 22 plant structures; EXPRESSED DURING: 14 growth stages; CONTAINS InterPro DOMAIN/s: Mannose-binding lectin (InterPro:IPR001229); BEST Arabidopsis thaliana protein match is: myrosinase-binding protein 1 (TAIR:AT1G52040.1)	Mannose-binding lectin	NO
AT1G52030	UP	myrosinase-binding protein 2	myrosinase-binding protein 2 (MBP2); FUNCTIONS IN: sugar binding, thioglucosidase binding; INVOLVED IN: flower development, cell adhesion, response to wounding, defense response; LOCATED IN: thioglucosidase complex; EXPRESSED IN: fruit, flower; EXPRESSED DURING: seed development stages; CONTAINS InterPro DOMAIN/s: Mannose-binding lectin (InterPro:IPR001229); BEST Arabidopsis thaliana protein matc…	Mannose-binding lectin	NO
AT1G52040	UP	myrosinase-binding protein 1	myrosinase-binding protein 1 (MBP1); INVOLVED IN: defense response; LOCATED IN: nucleus, vacuole; EXPRESSED IN: vascular tissue, fruit, flower, leaf; EXPRESSED DURING: seedling growth, seed development stages; CONTAINS InterPro DOMAIN/s: Mannose-binding lectin (InterPro:IPR001229); BEST Arabidopsis thaliana protein match is: myrosinase-binding protein 2 (TAIR:AT1G52030.1)	Mannose-binding lectin	NO
AT1G52565	UP		unknown protein; FUNCTIONS IN: molecular_function unknown; INVOLVED IN: biological_process unknown; LOCATED IN: endomembrane system; BEST Arabidopsis thaliana protein match is: unknown protein (TAIR:AT3G15760.1)		NO
AT1G52880	UP	NAC (No Apical Meristem) domain transcriptional regulator superfamily protein	NO APICAL MERISTEM (NAM); FUNCTIONS IN: sequence-specific DNA binding transcription factor activity; INVOLVED IN: multicellular organismal development, regulation of transcription; LOCATED IN: cellular_component unknown; EXPRESSED IN: 21 plant structures; EXPRESSED DURING: 12 growth stages; CONTAINS InterPro DOMAIN/s: No apical meristem (NAM) protein (InterPro:IPR003441); BEST Arabidopsis thalian…	NAC domain	NO
AT1G52890	DOWN	NAC domain containing protein 19	NAC domain containing protein 19 (NAC019); CONTAINS InterPro DOMAIN/s: No apical meristem (NAM) protein (InterPro:IPR003441); BEST Arabidopsis thaliana protein match is: NAC domain containing protein 3 (TAIR:AT3G15500.1)	NAC domain	NO
AT1G54100	DOWN	aldehyde dehydrogenase 7B4	aldehyde dehydrogenase 7B4 (ALDH7B4); FUNCTIONS IN: 3-chloroallyl aldehyde dehydrogenase activity, oxidoreductase activity; INVOLVED IN: response to desiccation, response to salt stress, response to abscisic acid stimulus; EXPRESSED IN: 23 plant structures; EXPRESSED DURING: 15 growth stages; CONTAINS InterPro DOMAIN/s: Aldehyde/histidinol dehydrogenase (InterPro:IPR016161), Aldehyde dehydrogenas…	Aldehyde dehydrogenase domain | Aldehyde dehydrogenase, C-terminal | Aldehyde dehydrogenase, N-terminal | Aldehyde dehydrogenase, glutamic acid active site | Aldehyde/histidinol dehydrogenase	NO
AT1G55020	UP	lipoxygenase 1	lipoxygenase 1 (LOX1); CONTAINS InterPro DOMAIN/s: Lipoxygenase, iron binding site (InterPro:IPR020833), Lipoxygenase, C-terminal (InterPro:IPR013819), Lipoxygenase, LH2 (InterPro:IPR001024), Lipase/lipooxygenase, PLAT/LH2 (InterPro:IPR008976), Lipoxygenase, conserved site (InterPro:IPR020834), Lipoxygenase (InterPro:IPR000907), Lipoxygenase, plant (InterPro:IPR001246); BEST Arabidopsis thaliana …	Lipase/lipooxygenase, PLAT/LH2 | Lipoxygenase | Lipoxygenase, C-terminal | Lipoxygenase, conserved site | Lipoxygenase, domain 3 | Lipoxygenase, iron binding site | Lipoxygenase, plant | PLAT/LH2 domain	NO
AT1G55265	UP	Protein of unknown function, DUF538	Protein of unknown function, DUF538; INVOLVED IN: biological_process unknown; LOCATED IN: vacuole; EXPRESSED IN: 23 plant structures; EXPRESSED DURING: 13 growth stages; CONTAINS InterPro DOMAIN/s: Protein of unknown function DUF538 (InterPro:IPR007493); BEST Arabidopsis thaliana protein match is: Protein of unknown function, DUF538 (TAIR:AT5G19860.1)		NO
AT1G55330	DOWN	arabinogalactan protein 21	arabinogalactan protein 21 (AGP21); BEST Arabidopsis thaliana protein match is: arabinogalactan protein 12 (TAIR:AT3G13520.1)		NO
AT1G55380	UP	Cysteine/Histidine-rich C1 domain family protein	Cysteine/Histidine-rich C1 domain family protein; CONTAINS InterPro DOMAIN/s: DC1 (InterPro:IPR004146), C1-like (InterPro:IPR011424); BEST Arabidopsis thaliana protein match is: Cysteine/Histidine-rich C1 domain family protein (TAIR:AT1G55420.1)	C1-like | DC1	NO
AT1G55450	UP	S-adenosyl-L-methionine-dependent methyltransferases superfamily protein	S-adenosyl-L-methionine-dependent methyltransferases superfamily protein; FUNCTIONS IN: methyltransferase activity; EXPRESSED IN: 20 plant structures; INVOLVED IN: response to salt stress; EXPRESSED DURING: 13 growth stages; CONTAINS InterPro DOMAIN/s: Methyltransferase type 11 (InterPro:IPR013216); BEST Arabidopsis thaliana protein match is: S-adenosyl-L-methionine-dependent methyltransferases s…	Methyltransferase type 11 | S-adenosyl-L-methionine-dependent methyltransferase-like	NO
AT1G55920	UP	serine acetyltransferase 2;1	serine acetyltransferase 2;1 (SERAT2;1); FUNCTIONS IN: serine O-acetyltransferase activity; INVOLVED IN: cellular response to sulfate starvation, response to cold; LOCATED IN: cytosol, chloroplast, nucleus; EXPRESSED IN: 22 plant structures; EXPRESSED DURING: 13 growth stages; CONTAINS InterPro DOMAIN/s: Hexapeptide transferase, conserved site (InterPro:IPR018357), Serine O-acetyltransferase (Int…	Bacterial transferase hexapeptide repeat | Hexapeptide transferase, conserved site | Serine O-acetyltransferase | Serine acetyltransferase, N-terminal | Trimeric LpxA-like	NO
AT1G56300	DOWN	Chaperone DnaJ-domain superfamily protein	Chaperone DnaJ-domain superfamily protein; FUNCTIONS IN: heat shock protein binding; INVOLVED IN: protein folding, response to cyclopentenone; LOCATED IN: cellular_component unknown; EXPRESSED IN: 23 plant structures; EXPRESSED DURING: 15 growth stages; CONTAINS InterPro DOMAIN/s: Molecular chaperone, heat shock protein, Hsp40, DnaJ (InterPro:IPR015609), Heat shock protein DnaJ, N-terminal (Inter…	DnaJ domain | DnaJ domain, conserved site	NO
AT1G56600	UP	galactinol synthase 2	galactinol synthase 2 (GolS2); CONTAINS InterPro DOMAIN/s: Glycosyl transferase, family 8 (InterPro:IPR002495); BEST Arabidopsis thaliana protein match is: galactinol synthase 3 (TAIR:AT1G09350.1)	Glycosyl transferase, family 8 | Nucleotide-diphospho-sugar transferases	NO
AT1G57680	DOWN		FUNCTIONS IN: molecular_function unknown; INVOLVED IN: biological_process unknown; LOCATED IN: endomembrane system; EXPRESSED IN: 24 plant structures; EXPRESSED DURING: 15 growth stages; CONTAINS InterPro DOMAIN/s: Uncharacterised conserved protein UCP031277 (InterPro:IPR016971)	Uncharacterised conserved protein UCP031277	NO
AT1G57980	DOWN	Nucleotide-sugar transporter family protein	Nucleotide-sugar transporter family protein; CONTAINS InterPro DOMAIN/s: Protein of unknown function DUF250 (InterPro:IPR004853); BEST Arabidopsis thaliana protein match is: purine permease 17 (TAIR:AT1G57943.1)	Triose-phosphate transporter domain	NO
AT1G59920	UP	MADS-box family protein	MADS-box family protein; BEST Arabidopsis thaliana protein match is: MADS-box family protein (TAIR:AT1G59930.1)		NO
AT1G59930	UP	MADS-box family protein	MADS-box family protein; BEST Arabidopsis thaliana protein match is: MADS-box family protein (TAIR:AT1G59920.1)		NO
AT1G60110	UP	Mannose-binding lectin superfamily protein	Mannose-binding lectin superfamily protein; EXPRESSED IN: cultured cell; CONTAINS InterPro DOMAIN/s: Mannose-binding lectin (InterPro:IPR001229); BEST Arabidopsis thaliana protein match is: Mannose-binding lectin superfamily protein (TAIR:AT1G60130.1)	Mannose-binding lectin	YES	1:22170154:G-T;exonic_variant
AT1G60787	UP				NO
AT1G61100	DOWN	disease resistance protein (TIR class), putative	disease resistance protein (TIR class), putative; INVOLVED IN: defense response; LOCATED IN: cellular_component unknown; EXPRESSED IN: 23 plant structures; EXPRESSED DURING: 13 growth stages; BEST Arabidopsis thaliana protein match is: COP1-interacting protein 7 (TAIR:AT4G27430.2)		NO
AT1G61750	DOWN	Receptor-like protein kinase-related family protein	Receptor-like protein kinase-related family protein; FUNCTIONS IN: molecular_function unknown; INVOLVED IN: biological_process unknown; LOCATED IN: endomembrane system; EXPRESSED IN: root; CONTAINS InterPro DOMAIN/s: Protein of unknown function DUF26 (InterPro:IPR002902); BEST Arabidopsis thaliana protein match is: Receptor-like protein kinase-related family protein (TAIR:AT1G63590.1)	Gnk2-homologous domain	NO
AT1G61900	DOWN		unknown protein; BEST Arabidopsis thaliana protein match is: unknown protein (TAIR:AT2G30700.1); FUNCTIONS IN: molecular_function unknown; INVOLVED IN: biological_process unknown; LOCATED IN: anchored to plasma membrane, plasma membrane, anchored to membrane; EXPRESSED IN: 23 plant structures; EXPRESSED DURING: 13 growth stages		NO
AT1G62520	DOWN		unknown protein; BEST Arabidopsis thaliana protein match is: unknown protein (TAIR:AT4G12450.1)	Poly(ADP-ribose) polymerase, catalytic domain	NO
AT1G62540	UP	flavin-monooxygenase glucosinolate S-oxygenase 2	flavin-monooxygenase glucosinolate S-oxygenase 2 (FMO GS-OX2); CONTAINS InterPro DOMAIN/s: Flavin-containing monooxygenase FMO (InterPro:IPR000960), Flavin-containing monooxygenase-like (InterPro:IPR020946); BEST Arabidopsis thaliana protein match is: flavin-monooxygenase glucosinolate S-oxygenase 1 (TAIR:AT1G65860.1)	Flavin monooxygenase FMO | Flavin monooxygenase-like	NO
AT1G62560	UP	flavin-monooxygenase glucosinolate S-oxygenase 3	flavin-monooxygenase glucosinolate S-oxygenase 3 (FMO GS-OX3); CONTAINS InterPro DOMAIN/s: Flavin-containing monooxygenase FMO (InterPro:IPR000960), Flavin-containing monooxygenase-like (InterPro:IPR020946); BEST Arabidopsis thaliana protein match is: flavin-monooxygenase glucosinolate S-oxygenase 2 (TAIR:AT1G62540.1)	Flavin monooxygenase FMO | Flavin monooxygenase-like	NO
AT1G62770	DOWN	Plant invertase/pectin methylesterase inhibitor superfamily protein	Plant invertase/pectin methylesterase inhibitor superfamily protein; FUNCTIONS IN: enzyme inhibitor activity, pectinesterase inhibitor activity, pectinesterase activity; INVOLVED IN: biological_process unknown; LOCATED IN: endomembrane system; EXPRESSED IN: 16 plant structures; EXPRESSED DURING: 8 growth stages; CONTAINS InterPro DOMAIN/s: Pectinesterase inhibitor (InterPro:IPR006501); BEST Arabi…	Pectinesterase inhibitor domain	NO
AT1G62975	UP	basic helix-loop-helix (bHLH) DNA-binding superfamily protein	basic helix-loop-helix (bHLH) DNA-binding superfamily protein; FUNCTIONS IN: DNA binding, sequence-specific DNA binding transcription factor activity; INVOLVED IN: regulation of transcription; LOCATED IN: nucleus; CONTAINS InterPro DOMAIN/s: Helix-loop-helix DNA-binding domain (InterPro:IPR001092), Helix-loop-helix DNA-binding (InterPro:IPR011598); BEST Arabidopsis thaliana protein match is: basi…	Achaete-scute transcription factor-related | Myc-type, basic helix-loop-helix (bHLH) domain	NO
AT1G63180	DOWN	UDP-D-glucose/UDP-D-galactose 4-epimerase 3	UDP-D-glucose/UDP-D-galactose 4-epimerase 3 (UGE3); CONTAINS InterPro DOMAIN/s: NAD-dependent epimerase/dehydratase (InterPro:IPR001509), NAD(P)-binding domain (InterPro:IPR016040), UDP-glucose 4-epimerase (InterPro:IPR005886); BEST Arabidopsis thaliana protein match is: UDP-D-glucose/UDP-D-galactose 4-epimerase 1 (TAIR:AT1G12780.1)	NAD(P)-binding domain | NAD-dependent epimerase/dehydratase, N-terminal domain | UDP-glucose 4-epimerase C-terminal domain | UDP-glucose 4-epimerase GalE	NO
AT1G64360	UP		unknown protein		NO
AT1G64390	UP	glycosyl hydrolase 9C2	glycosyl hydrolase 9C2 (GH9C2); FUNCTIONS IN: carbohydrate binding, hydrolase activity, hydrolyzing O-glycosyl compounds, catalytic activity; INVOLVED IN: carbohydrate metabolic process; LOCATED IN: endomembrane system, extracellular region; EXPRESSED IN: 23 plant structures; EXPRESSED DURING: 13 growth stages; CONTAINS InterPro DOMAIN/s: Six-hairpin glycosidase (InterPro:IPR012341), Carbohydrate…	Carbohydrate binding domain CBM49 | Glycoside hydrolase, family 9 | Glycoside hydrolase, family 9, active site | Six-hairpin glycosidase | Six-hairpin glycosidase-like	NO
AT1G64400	UP	AMP-dependent synthetase and ligase family protein	long-chain acyl-CoA synthetase 3 (LACS3); FUNCTIONS IN: catalytic activity; INVOLVED IN: fatty acid biosynthetic process; EXPRESSED IN: 22 plant structures; EXPRESSED DURING: 13 growth stages; CONTAINS InterPro DOMAIN/s: AMP-binding, conserved site (InterPro:IPR020845), AMP-dependent synthetase/ligase (InterPro:IPR000873); BEST Arabidopsis thaliana protein match is: AMP-dependent synthetase and l…	AMP-binding, conserved site | AMP-dependent synthetase/ligase	NO
AT1G64610	UP	Transducin/WD40 repeat-like superfamily protein	Transducin/WD40 repeat-like superfamily protein; CONTAINS InterPro DOMAIN/s: WD40 repeat 2 (InterPro:IPR019782), WD40 repeat-like-containing domain (InterPro:IPR011046), WD40-repeat-containing domain (InterPro:IPR017986), WD40/YVTN repeat-like-containing domain (InterPro:IPR015943), WD40 repeat (InterPro:IPR001680), WD40 repeat, subgroup (InterPro:IPR019781), G-protein beta WD-40 repeat, region (…	G-protein beta WD-40 repeat | WD40 repeat | WD40-repeat-containing domain | WD40/YVTN repeat-like-containing domain	NO
AT1G64780	UP	ammonium transporter 1;2	ammonium transporter 1;2 (AMT1;2); CONTAINS InterPro DOMAIN/s: Ammonium transporter (InterPro:IPR001905), Ammonium transporter, conserved site (InterPro:IPR018047); BEST Arabidopsis thaliana protein match is: ammonium transporter 1;1 (TAIR:AT4G13510.1)	Ammonium transporter | Ammonium transporter AmtB-like domain | Ammonium transporter, conserved site | Ammonium/urea transporter	NO
AT1G65490	UP		unknown protein; FUNCTIONS IN: molecular_function unknown; INVOLVED IN: biological_process unknown; LOCATED IN: endomembrane system; EXPRESSED IN: 22 plant structures; EXPRESSED DURING: 13 growth stages; BEST Arabidopsis thaliana protein match is: unknown protein (TAIR:AT1G65486.1)		NO
AT1G65500	UP		unknown protein; FUNCTIONS IN: molecular_function unknown; INVOLVED IN: biological_process unknown; LOCATED IN: endomembrane system; EXPRESSED IN: 14 plant structures; EXPRESSED DURING: 9 growth stages; BEST Arabidopsis thaliana protein match is: unknown protein (TAIR:AT1G65486.1)		NO
AT1G65860	UP	flavin-monooxygenase glucosinolate S-oxygenase 1	flavin-monooxygenase glucosinolate S-oxygenase 1 (FMO GS-OX1); CONTAINS InterPro DOMAIN/s: Flavin-containing monooxygenase FMO (InterPro:IPR000960), Flavin-containing monooxygenase-like (InterPro:IPR020946); BEST Arabidopsis thaliana protein match is: flavin-monooxygenase glucosinolate S-oxygenase 2 (TAIR:AT1G62540.1)	Flavin monooxygenase FMO | Flavin monooxygenase-like	NO
AT1G65970	UP	thioredoxin-dependent peroxidase 2	thioredoxin-dependent peroxidase 2 (TPX2); FUNCTIONS IN: oxidoreductase activity, antioxidant activity; INVOLVED IN: cell redox homeostasis; LOCATED IN: cellular_component unknown; EXPRESSED IN: leaf; CONTAINS InterPro DOMAIN/s: Thioredoxin fold (InterPro:IPR012335), Thioredoxin-like (InterPro:IPR017936), Thioredoxin-like fold (InterPro:IPR012336), Redoxin (InterPro:IPR013740); BEST Arabidopsis t…	Redoxin | Thioredoxin-like fold	NO
AT1G66060	DOWN	Family of unknown function (DUF577)	Family of unknown function (DUF577); CONTAINS InterPro DOMAIN/s: Protein of unknown function DUF577 (InterPro:IPR007598); BEST Arabidopsis thaliana protein match is: Family of unknown function (DUF577) (TAIR:AT1G66000.1)	Armadillo-type fold | Protein of unknown function DUF577	NO
AT1G66150	DOWN	transmembrane kinase 1	transmembrane kinase 1 (TMK1); FUNCTIONS IN: transmembrane receptor protein serine/threonine kinase activity; INVOLVED IN: signal transduction; LOCATED IN: extracellular region, plasma membrane; EXPRESSED IN: 23 plant structures; EXPRESSED DURING: 13 growth stages; CONTAINS InterPro DOMAIN/s: Protein kinase, ATP binding site (InterPro:IPR017441), Protein kinase, catalytic domain (InterPro:IPR0007…	Concanavalin A-like lectin/glucanase, subgroup | Leucine-rich repeat | Leucine-rich repeat, typical subtype | Leucine-rich repeat-containing N-terminal, type 2 | Protein kinase domain | Protein kinase, ATP binding site | Protein kinase-like domain | Serine/threonine-protein kinase, active site	NO
AT1G66180	DOWN	Eukaryotic aspartyl protease family protein	Eukaryotic aspartyl protease family protein; FUNCTIONS IN: aspartic-type endopeptidase activity; INVOLVED IN: proteolysis; LOCATED IN: endomembrane system; EXPRESSED IN: 22 plant structures; EXPRESSED DURING: 13 growth stages; CONTAINS InterPro DOMAIN/s: Peptidase aspartic (InterPro:IPR021109), Peptidase aspartic, catalytic (InterPro:IPR009007), Peptidase A1 (InterPro:IPR001461); BEST Arabidopsis…	Aspartic peptidase | Aspartic peptidase domain	NO
AT1G66460	UP	Protein kinase superfamily protein	Protein kinase superfamily protein; FUNCTIONS IN: protein serine/threonine kinase activity, protein kinase activity, kinase activity, ATP binding; INVOLVED IN: protein amino acid phosphorylation; LOCATED IN: cellular_component unknown; EXPRESSED IN: 6 plant structures; EXPRESSED DURING: 4 anthesis, petal differentiation and expansion stage; CONTAINS InterPro DOMAIN/s: Protein kinase, catalytic do…	Protein kinase domain | Protein kinase-like domain | Serine/threonine-protein kinase, active site	NO
AT1G66725	UP	MIR163; miRNA			NO
AT1G66783	DOWN	MIR157A; miRNA			NO
AT1G66800	UP	NAD(P)-binding Rossmann-fold superfamily protein	NAD(P)-binding Rossmann-fold superfamily protein; FUNCTIONS IN: alcohol dehydrogenase (NAD) activity, cinnamyl-alcohol dehydrogenase activity; INVOLVED IN: lignin biosynthetic process, cellular metabolic process, metabolic process; LOCATED IN: cellular_component unknown; EXPRESSED IN: sperm cell, hypocotyl, root, pollen tube; CONTAINS InterPro DOMAIN/s: NAD-dependent epimerase/dehydratase (InterP…	NAD(P)-binding domain | NAD-dependent epimerase/dehydratase, N-terminal domain	NO
AT1G67105	UP	other RNA			YES	1:25058254:G-GA;exonic_variant
AT1G67230	DOWN	little nuclei1	LITTLE NUCLEI1 (LINC1); FUNCTIONS IN: molecular_function unknown; INVOLVED IN: nucleus organization; LOCATED IN: cytosol, nucleus; EXPRESSED IN: 25 plant structures; EXPRESSED DURING: 13 growth stages; BEST Arabidopsis thaliana protein match is: nuclear matrix constituent protein-related (TAIR:AT1G13220.2)		NO
AT1G67360	UP	Rubber elongation factor protein (REF)	Rubber elongation factor protein (REF); INVOLVED IN: biological_process unknown; LOCATED IN: vacuole; EXPRESSED IN: 24 plant structures; EXPRESSED DURING: 15 growth stages; CONTAINS InterPro DOMAIN/s: Rubber elongation factor (InterPro:IPR008802); BEST Arabidopsis thaliana protein match is: Rubber elongation factor protein (REF) (TAIR:AT2G47780.1)	Rubber elongation factor	NO
AT1G67865	UP		unknown protein; BEST Arabidopsis thaliana protein match is: unknown protein (TAIR:AT1G67860.1)		NO
AT1G67910	DOWN		unknown protein; FUNCTIONS IN: molecular_function unknown; INVOLVED IN: biological_process unknown; LOCATED IN: chloroplast; EXPRESSED IN: 21 plant structures; EXPRESSED DURING: 12 growth stages; BEST Arabidopsis thaliana protein match is: unknown protein (TAIR:AT1G24577.1)		NO
AT1G68020	DOWN	UDP-Glycosyltransferase / trehalose-phosphatase family protein	ATTPS6; CONTAINS InterPro DOMAIN/s: Glycosyl transferase, family 20 (InterPro:IPR001830), Trehalose-phosphatase (InterPro:IPR003337); CONTAINS InterPro DOMAIN/s: HAD-superfamily hydrolase, subfamily IIB (InterPro:IPR006379), Glycosyl transferase, family 20 (InterPro:IPR001830), Trehalose-phosphatase (InterPro:IPR003337); BEST Arabidopsis thaliana protein match is: trehalose phosphatase/synthase 5…	Glycosyl transferase, family 20 | HAD-like domain | HAD-superfamily hydrolase, subfamily IIB | Trehalose-phosphatase	NO
AT1G68170	DOWN	nodulin MtN21 /EamA-like transporter family protein	nodulin MtN21 /EamA-like transporter family protein; LOCATED IN: membrane; EXPRESSED IN: embryo, leaf whorl, seed; EXPRESSED DURING: C globular stage, E expanded cotyledon stage; CONTAINS InterPro DOMAIN/s: Protein of unknown function DUF6, transmembrane (InterPro:IPR000620); BEST Arabidopsis thaliana protein match is: nodulin MtN21 /EamA-like transporter family protein (TAIR:AT1G25270.1)	Drug/metabolite transporter	NO
AT1G68520	DOWN	B-box type zinc finger protein with CCT domain	B-box type zinc finger protein with CCT domain; FUNCTIONS IN: sequence-specific DNA binding transcription factor activity, zinc ion binding; INVOLVED IN: regulation of transcription; LOCATED IN: intracellular; EXPRESSED IN: 21 plant structures; EXPRESSED DURING: 13 growth stages; CONTAINS InterPro DOMAIN/s: CCT domain (InterPro:IPR010402), Zinc finger, B-box (InterPro:IPR000315); BEST Arabidopsis…	CCT domain | Zinc finger, B-box	NO
AT1G68710	UP	ATPase E1-E2 type family protein / haloacid dehalogenase-like hydrolase family protein	ATPase E1-E2 type family protein / haloacid dehalogenase-like hydrolase family protein; FUNCTIONS IN: ATPase activity, coupled to transmembrane movement of ions, phosphorylative mechanism; INVOLVED IN: metabolic process, phospholipid transport, ATP biosynthetic process; LOCATED IN: mitochondrion, integral to membrane, membrane; EXPRESSED IN: 23 plant structures; EXPRESSED DURING: 15 growth stages…	Cation-transporting P-type ATPase, subfamily IV | Cation-transporting P-type ATPase | HAD-like domain | P-type ATPase, A domain | P-type ATPase, cytoplasmic domain N | P-type ATPase, phosphorylation site	NO
AT1G69160	DOWN		unknown protein; BEST Arabidopsis thaliana protein match is: unknown protein (TAIR:AT3G13980.1)		NO
AT1G69360	DOWN	Plant protein of unknown function (DUF863)	Plant protein of unknown function (DUF863); CONTAINS InterPro DOMAIN/s: Protein of unknown function DUF863, plant (InterPro:IPR008581); BEST Arabidopsis thaliana protein match is: Plant protein of unknown function (DUF863) (TAIR:AT1G26620.1)	Protein of unknown function DUF863, plant	NO
AT1G69530	UP	expansin A1	expansin A1 (EXPA1); CONTAINS InterPro DOMAIN/s: Barwin-related endoglucanase (InterPro:IPR009009), Pollen allergen, N-terminal (InterPro:IPR014734), Expansin (InterPro:IPR002963), Rare lipoprotein A (InterPro:IPR005132), Expansin/Lol pI (InterPro:IPR007118), Expansin 45, endoglucanase-like (InterPro:IPR007112), Pollen allergen/expansin, C-terminal (InterPro:IPR007117); CONTAINS InterPro DOMAIN/s…	Barwin-like endoglucanase | Expansin | Expansin, cellulose-binding-like domain | Expansin/Lol pI | Expansin/pollen allergen, DPBB domain | RlpA-like double-psi beta-barrel domain	NO
AT1G69730	UP	Wall-associated kinase family protein	Wall-associated kinase family protein; FUNCTIONS IN: kinase activity; INVOLVED IN: protein amino acid phosphorylation; LOCATED IN: endomembrane system, integral to membrane; EXPRESSED IN: 18 plant structures; EXPRESSED DURING: 12 growth stages; CONTAINS InterPro DOMAIN/s: Wall-associated kinase (InterPro:IPR013695), EGF-like calcium-binding, conserved site (InterPro:IPR018097), Protein kinase, ca…	Concanavalin A-like lectin/glucanase, subgroup | EGF-like calcium-binding, conserved site | Protein kinase domain | Protein kinase-like domain | Serine/threonine-protein kinase, active site | Wall-associated receptor kinase | Wall-associated receptor kinase galacturonan-binding domain	NO
AT1G69760	DOWN		unknown protein; BEST Arabidopsis thaliana protein match is: unknown protein (TAIR:AT1G26920.1)		NO
AT1G70090	DOWN	glucosyl transferase family 8	glucosyl transferase family 8 (LGT8); FUNCTIONS IN: transferase activity, transferring hexosyl groups, polygalacturonate 4-alpha-galacturonosyltransferase activity, transferase activity, transferring glycosyl groups; INVOLVED IN: carbohydrate biosynthetic process; LOCATED IN: endomembrane system; EXPRESSED IN: 22 plant structures; EXPRESSED DURING: 13 growth stages; CONTAINS InterPro DOMAIN/s: Gl…	Glycosyl transferase, family 8 | Nucleotide-diphospho-sugar transferases	NO
AT1G70100	DOWN		unknown protein; FUNCTIONS IN: molecular_function unknown; INVOLVED IN: biological_process unknown; LOCATED IN: cellular_component unknown; EXPRESSED IN: 22 plant structures; EXPRESSED DURING: 13 growth stages; BEST Arabidopsis thaliana protein match is: unknown protein (TAIR:AT1G24160.2)		NO
AT1G70290	DOWN	trehalose-6-phosphatase synthase S8	trehalose-6-phosphatase synthase S8 (TPS8); FUNCTIONS IN: transferase activity, transferring glycosyl groups; INVOLVED IN: trehalose biosynthetic process, metabolic process; EXPRESSED IN: 26 plant structures; EXPRESSED DURING: 13 growth stages; CONTAINS InterPro DOMAIN/s: HAD-superfamily hydrolase, subfamily IIB (InterPro:IPR006379), Glycosyl transferase, family 20 (InterPro:IPR001830), Trehalose…	Glycosyl transferase, family 20 | HAD-like domain | HAD-superfamily hydrolase, subfamily IIB | Trehalose-phosphatase	NO
AT1G70530	DOWN	cysteine-rich RLK (RECEPTOR-like protein kinase) 3	cysteine-rich RLK (RECEPTOR-like protein kinase) 3 (CRK3); FUNCTIONS IN: kinase activity; INVOLVED IN: protein amino acid phosphorylation; LOCATED IN: plasma membrane; EXPRESSED IN: 23 plant structures; EXPRESSED DURING: 14 growth stages; CONTAINS InterPro DOMAIN/s: Protein kinase, ATP binding site (InterPro:IPR017441), Protein kinase, catalytic domain (InterPro:IPR000719), Protein of unknown fun…	Concanavalin A-like lectin/glucanase, subgroup | Gnk2-homologous domain | Protein kinase domain | Protein kinase, ATP binding site | Protein kinase-like domain | Serine/threonine-protein kinase, active site	NO
AT1G70890	UP	MLP-like protein 43	MLP-like protein 43 (MLP43); FUNCTIONS IN: molecular_function unknown; INVOLVED IN: response to biotic stimulus, defense response; LOCATED IN: chloroplast; EXPRESSED IN: 17 plant structures; EXPRESSED DURING: 10 growth stages; CONTAINS InterPro DOMAIN/s: Bet v I allergen (InterPro:IPR000916); BEST Arabidopsis thaliana protein match is: MLP-like protein 28 (TAIR:AT1G70830.5)	Bet v I domain | Major latex protein domain | START-like domain	NO
AT1G70900	UP		unknown protein; BEST Arabidopsis thaliana protein match is: unknown protein (TAIR:AT1G23110.4)		NO
AT1G71200	UP	basic helix-loop-helix (bHLH) DNA-binding superfamily protein	basic helix-loop-helix (bHLH) DNA-binding superfamily protein; FUNCTIONS IN: DNA binding, sequence-specific DNA binding transcription factor activity; INVOLVED IN: regulation of transcription; LOCATED IN: nucleus; CONTAINS InterPro DOMAIN/s: Helix-loop-helix DNA-binding domain (InterPro:IPR001092), Helix-loop-helix DNA-binding (InterPro:IPR011598); BEST Arabidopsis thaliana protein match is: basi…	Myc-type, basic helix-loop-helix (bHLH) domain	NO
AT1G71480	DOWN	Nuclear transport factor 2 (NTF2) family protein	Nuclear transport factor 2 (NTF2) family protein; FUNCTIONS IN: protein transporter activity; INVOLVED IN: transport, protein import into nucleus; LOCATED IN: chloroplast thylakoid membrane, intracellular, nucleus, chloroplast; EXPRESSED IN: 22 plant structures; EXPRESSED DURING: 13 growth stages; CONTAINS InterPro DOMAIN/s: Nuclear transport factor 2 (InterPro:IPR002075); BEST Arabidopsis thalia…	Nuclear transport factor 2	NO
AT1G71696	DOWN	carboxypeptidase D, putative	SUPPRESSOR OF LLP1 1 (SOL1); FUNCTIONS IN: metallocarboxypeptidase activity, carboxypeptidase activity, zinc ion binding; INVOLVED IN: regulation of root meristem growth; LOCATED IN: endomembrane system; EXPRESSED IN: 14 plant structures; EXPRESSED DURING: 6 growth stages; CONTAINS InterPro DOMAIN/s: Carboxypeptidase-like, regulatory domain (InterPro:IPR008969), Peptidase M14, carboxypeptidase A …	Carboxypeptidase, regulatory domain | Carboxypeptidase-like, regulatory domain | Peptidase M14, carboxypeptidase A	NO
AT1G72030	UP	Acyl-CoA N-acyltransferases (NAT) superfamily protein	Acyl-CoA N-acyltransferases (NAT) superfamily protein; FUNCTIONS IN: N-acetyltransferase activity; INVOLVED IN: metabolic process; EXPRESSED IN: 22 plant structures; EXPRESSED DURING: 13 growth stages; CONTAINS InterPro DOMAIN/s: GCN5-related N-acetyltransferase, C-terminal (InterPro:IPR022610), GCN5-related N-acetyltransferase (InterPro:IPR000182), Acyl-CoA N-acyltransferase (InterPro:IPR016181)	Acyl-CoA N-acyltransferase | GNAT domain	NO
AT1G72150	DOWN	PATELLIN 1	PATELLIN 1 (PATL1); FUNCTIONS IN: transporter activity; INVOLVED IN: transport, pollen tube growth; LOCATED IN: apoplast, plasma membrane, chloroplast, vacuole, membrane; EXPRESSED IN: 25 plant structures; EXPRESSED DURING: 15 growth stages; CONTAINS InterPro DOMAIN/s: Cellular retinaldehyde-binding/triple function, C-terminal (InterPro:IPR001251), Cellular retinaldehyde-binding/triple function, …	CRAL-TRIO domain | CRAL/TRIO, N-terminal domain | GOLD	NO
AT1G72416	DOWN	Chaperone DnaJ-domain superfamily protein	Chaperone DnaJ-domain superfamily protein; FUNCTIONS IN: heat shock protein binding; INVOLVED IN: biological_process unknown; LOCATED IN: cellular_component unknown; BEST Arabidopsis thaliana protein match is: Chaperone DnaJ-domain superfamily protein (TAIR:AT3G14200.1); CONTAINS InterPro DOMAIN/s: Molecular chaperone, heat shock protein, Hsp40, DnaJ (InterPro:IPR015609), Heat shock protein DnaJ,…	DnaJ domain | DnaJ domain, conserved site	NO
AT1G72430	DOWN	SAUR-like auxin-responsive protein family	SAUR-like auxin-responsive protein family ; CONTAINS InterPro DOMAIN/s: Auxin responsive SAUR protein (InterPro:IPR003676); BEST Arabidopsis thaliana protein match is: SAUR-like auxin-responsive protein family (TAIR:AT1G17345.1)	Auxin-induced protein, ARG7	NO
AT1G72610	DOWN	germin-like protein 1	germin-like protein 1 (GER1); INVOLVED IN: biological_process unknown; LOCATED IN: extracellular matrix; EXPRESSED IN: 23 plant structures; EXPRESSED DURING: 13 growth stages; CONTAINS InterPro DOMAIN/s: Cupin, RmlC-type (InterPro:IPR011051), Cupin 1 (InterPro:IPR006045), Germin (InterPro:IPR001929), RmlC-like jelly roll fold (InterPro:IPR014710), Germin, manganese binding site (InterPro:IPR01978…	Cupin 1 | Germin | Germin, manganese binding site | RmlC-like cupin domain | RmlC-like jelly roll fold	NO
AT1G73330	UP	drought-repressed 4	drought-repressed 4 (DR4); FUNCTIONS IN: peptidase inhibitor activity; INVOLVED IN: response to water deprivation; LOCATED IN: endomembrane system; EXPRESSED IN: 11 plant structures; EXPRESSED DURING: LP.06 six leaves visible, LP.04 four leaves visible, 4 leaf senescence stage, petal differentiation and expansion stage; CONTAINS InterPro DOMAIN/s: Proteinase inhibitor I3, Kunitz legume (InterPro:…	Kunitz inhibitor ST1-like | Proteinase inhibitor I3, Kunitz legume	NO
AT1G73550	DOWN	Bifunctional inhibitor/lipid-transfer protein/seed storage 2S albumin superfamily protein	Bifunctional inhibitor/lipid-transfer protein/seed storage 2S albumin superfamily protein; FUNCTIONS IN: lipid binding; INVOLVED IN: lipid transport; LOCATED IN: endomembrane system; CONTAINS InterPro DOMAIN/s: Bifunctional inhibitor/plant lipid transfer protein/seed storage (InterPro:IPR016140), Plant lipid transfer protein/seed storage/trypsin-alpha amylase inhibitor (InterPro:IPR003612); BEST …	Bifunctional inhibitor/plant lipid transfer protein/seed storage helical domain	NO
AT1G73870	DOWN	B-box type zinc finger protein with CCT domain	B-box type zinc finger protein with CCT domain; FUNCTIONS IN: sequence-specific DNA binding transcription factor activity, zinc ion binding; INVOLVED IN: regulation of transcription; LOCATED IN: intracellular; EXPRESSED IN: 14 plant structures; EXPRESSED DURING: 9 growth stages; CONTAINS InterPro DOMAIN/s: CCT domain (InterPro:IPR010402), Zinc finger, B-box (InterPro:IPR000315); BEST Arabidopsis …	CCT domain | Zinc finger, B-box	YES	1:27779240:C-T;protein_coding;sense;ACC>ACT;T>T
AT1G74200	UP	receptor like protein 16	receptor like protein 16 (RLP16); CONTAINS InterPro DOMAIN/s: Leucine-rich repeat (InterPro:IPR001611); BEST Arabidopsis thaliana protein match is: receptor like protein 13 (TAIR:AT1G74170.1)	Leucine-rich repeat	NO
AT1G74910	DOWN	ADP-glucose pyrophosphorylase family protein	ADP-glucose pyrophosphorylase family protein; FUNCTIONS IN: transferase activity, nucleotidyltransferase activity; INVOLVED IN: response to cadmium ion, biosynthetic process; LOCATED IN: peroxisome; EXPRESSED IN: 24 plant structures; EXPRESSED DURING: 13 growth stages; CONTAINS InterPro DOMAIN/s: Trimeric LpxA-like (InterPro:IPR011004), Nucleotidyl transferase (InterPro:IPR005835); BEST Arabidops…	Bacterial transferase hexapeptide repeat | Nucleotide-diphospho-sugar transferases | Nucleotidyl transferase	NO
AT1G75220	DOWN	Major facilitator superfamily protein	Major facilitator superfamily protein; FUNCTIONS IN: carbohydrate transmembrane transporter activity, sugar:hydrogen symporter activity; INVOLVED IN: transport, transmembrane transport; LOCATED IN: plasma membrane, membrane; EXPRESSED IN: 25 plant structures; EXPRESSED DURING: 15 growth stages; CONTAINS InterPro DOMAIN/s: Sugar transporter, conserved site (InterPro:IPR005829), Major facilitator s…	General substrate transporter | Major facilitator superfamily domain | Major facilitator superfamily domain, general substrate transporter | Sugar transporter, conserved site | Sugar/inositol transporter	NO
AT1G75230	DOWN	DNA glycosylase superfamily protein	DNA glycosylase superfamily protein; FUNCTIONS IN: catalytic activity; INVOLVED IN: DNA repair, base-excision repair; LOCATED IN: nucleus; EXPRESSED IN: 18 plant structures; EXPRESSED DURING: 9 growth stages; CONTAINS InterPro DOMAIN/s: DNA glycosylase (InterPro:IPR011257), HhH-GPD domain (InterPro:IPR003265); BEST Arabidopsis thaliana protein match is: DNA glycosylase superfamily protein (TAIR:A…	DNA glycosylase | Helix-turn-helix, base-excision DNA repair, C-terminal | HhH-GPD domain	NO
AT1G75460	DOWN	ATP-dependent protease La (LON) domain protein	ATP-dependent protease La (LON) domain protein; FUNCTIONS IN: ATP-dependent peptidase activity; INVOLVED IN: proteolysis; LOCATED IN: chloroplast; EXPRESSED IN: 19 plant structures; EXPRESSED DURING: 11 growth stages; CONTAINS InterPro DOMAIN/s: Peptidase S16, lon N-terminal (InterPro:IPR003111); BEST Arabidopsis thaliana protein match is: ATP-dependent protease La (LON) domain protein (TAIR:AT1G…	PUA-like domain | Peptidase S16, lon N-terminal	NO
AT1G76090	DOWN	sterol methyltransferase 3	sterol methyltransferase 3 (SMT3); CONTAINS InterPro DOMAIN/s: Sterol methyltransferase C-terminal (InterPro:IPR013705), Methyltransferase type 11 (InterPro:IPR013216); BEST Arabidopsis thaliana protein match is: sterol methyltransferase 2 (TAIR:AT1G20330.1)	ERGosterol biosynthesis methyltransferase, plant | Methyltransferase type 11 | S-adenosyl-L-methionine-dependent methyltransferase-like | Sterol methyltransferase C-terminal	NO
AT1G76100	DOWN	plastocyanin 1	plastocyanin 1 (PETE1); FUNCTIONS IN: electron carrier activity, copper ion binding; LOCATED IN: thylakoid, thylakoid lumen, chloroplast thylakoid lumen, chloroplast; EXPRESSED IN: 22 plant structures; EXPRESSED DURING: 13 growth stages; CONTAINS InterPro DOMAIN/s: Blue (type 1) copper protein (InterPro:IPR001235), Cupredoxin (InterPro:IPR008972), Plastocyanin (InterPro:IPR002387), Blue (type 1) …		NO
AT1G76410	DOWN	RING/U-box superfamily protein	ATL8; FUNCTIONS IN: zinc ion binding; EXPRESSED IN: 22 plant structures; EXPRESSED DURING: 13 growth stages; CONTAINS InterPro DOMAIN/s: Zinc finger, RING-type (InterPro:IPR001841), Zinc finger, C3HC4 RING-type (InterPro:IPR018957); BEST Arabidopsis thaliana protein match is: RING/U-box superfamily protein (TAIR:AT1G20823.1)	Zinc finger, RING-type | Zinc finger, RING/FYVE/PHD-type	NO
AT1G76620	UP	Protein of unknown function, DUF547	Protein of unknown function, DUF547; FUNCTIONS IN: molecular_function unknown; INVOLVED IN: biological_process unknown; LOCATED IN: chloroplast; EXPRESSED IN: 22 plant structures; EXPRESSED DURING: 13 growth stages; CONTAINS InterPro DOMAIN/s: Protein of unknown function DUF547 (InterPro:IPR006869); BEST Arabidopsis thaliana protein match is: Protein of unknown function, DUF547 (TAIR:AT1G21060.1)	Domain of unknown function DUF547 | Ternary complex factor MIP1, leucine-zipper	NO
AT1G76890	DOWN	Duplicated homeodomain-like superfamily protein	GT2; CONTAINS InterPro DOMAIN/s: SANT, DNA-binding (InterPro:IPR001005), MYB-like (InterPro:IPR017877); BEST Arabidopsis thaliana protein match is: Duplicated homeodomain-like superfamily protein (TAIR:AT1G76880.1)	Myb-like domain | SANT/Myb domain	NO
AT1G76960	UP		unknown protein; FUNCTIONS IN: molecular_function unknown; INVOLVED IN: biological_process unknown; LOCATED IN: endomembrane system; EXPRESSED IN: 9 plant structures; EXPRESSED DURING: 8 growth stages		NO
AT1G77120	UP	alcohol dehydrogenase 1	alcohol dehydrogenase 1 (ADH1); FUNCTIONS IN: alcohol dehydrogenase (NAD) activity; INVOLVED IN: response to cadmium ion, cellular respiration, response to salt stress, response to hypoxia, response to osmotic stress; LOCATED IN: cytosol, plasma membrane; EXPRESSED IN: 24 plant structures; EXPRESSED DURING: 12 growth stages; CONTAINS InterPro DOMAIN/s: GroES-like (InterPro:IPR011032), Alcohol deh…	Alcohol dehydrogenase GroES-like | Alcohol dehydrogenase superfamily, zinc-type | Alcohol dehydrogenase, C-terminal | Alcohol dehydrogenase, zinc-type, conserved site | GroES (chaperonin 10)-like | NAD(P)-binding domain	NO
AT1G77280	UP	Protein kinase protein with adenine nucleotide alpha hydrolases-like domain	Protein kinase protein with adenine nucleotide alpha hydrolases-like domain; FUNCTIONS IN: protein serine/threonine kinase activity, protein kinase activity, kinase activity, ATP binding; INVOLVED IN: protein amino acid phosphorylation, response to stress; LOCATED IN: cellular_component unknown; EXPRESSED IN: 16 plant structures; EXPRESSED DURING: 6 growth stages; CONTAINS InterPro DOMAIN/s: UspA…	Concanavalin A-like lectin/glucanase, subgroup | Protein kinase domain | Protein kinase, ATP binding site | Protein kinase-like domain | Rossmann-like alpha/beta/alpha sandwich fold | Serine/threonine-protein kinase, active site | UspA	NO
AT1G77920	UP	bZIP transcription factor family protein	bZIP transcription factor family protein; CONTAINS InterPro DOMAIN/s: Basic-leucine zipper (bZIP) transcription factor (InterPro:IPR004827), bZIP transcription factor, bZIP-1 (InterPro:IPR011616); BEST Arabidopsis thaliana protein match is: TGA1A-related gene 3 (TAIR:AT1G22070.1)	Basic-leucine zipper domain | Transcription factor TGA like domain	YES	1:29300903:T-TTA;exonic_variant,1:29300884:TA-T;exonic_variant,1:29300932:C-T;exonic_variant,1:29300853:A-G;exonic_variant,1:29300922:T-C;exonic_variant,1:29300905:ATG-A;exonic_variant,1:29300940:A-AG;exonic_variant,1:29300780:C-G;exonic_variant,1:29300755:G-T;exonic_variant,1:29300896:A-C;exonic_variant,1:29300880:T-A;exonic_variant,1:29300847:C-A;exonic_variant
AT1G77960	DOWN		unknown protein; BEST Arabidopsis thaliana protein match is: unknown protein (TAIR:AT1G28630.4)		NO
AT1G78720	DOWN	SecY protein transport family protein	SecY protein transport family protein; FUNCTIONS IN: P-P-bond-hydrolysis-driven protein transmembrane transporter activity; INVOLVED IN: protein secretion, protein transport; LOCATED IN: membrane; EXPRESSED IN: 6 plant structures; EXPRESSED DURING: LP.10 ten leaves visible, LP.02 two leaves visible, petal differentiation and expansion stage, LP.08 eight leaves visible; CONTAINS InterPro DOMAIN/s:…	SecY subunit domain | SecY/SEC61-alpha family | Translocon Sec61/SecY, plug domain	NO
AT1G79610	UP	Na+/H+ antiporter 6	Na+/H+ antiporter 6 (NHX6); FUNCTIONS IN: solute:hydrogen antiporter activity, sodium:hydrogen antiporter activity; INVOLVED IN: cation transport, sodium ion transport, regulation of pH, transmembrane transport; LOCATED IN: integral to membrane; EXPRESSED IN: 25 plant structures; EXPRESSED DURING: 15 growth stages; CONTAINS InterPro DOMAIN/s: Na+/H+ exchanger, subfamily (InterPro:IPR004709), Cati…	Cation/H+ exchanger | Cation/H+ exchanger, CPA1 family | Na+/H+ exchanger	NO
AT1G80130	DOWN	Tetratricopeptide repeat (TPR)-like superfamily protein	Tetratricopeptide repeat (TPR)-like superfamily protein; FUNCTIONS IN: binding; INVOLVED IN: response to oxidative stress; LOCATED IN: membrane; EXPRESSED IN: 18 plant structures; EXPRESSED DURING: 12 growth stages; CONTAINS InterPro DOMAIN/s: Tetratricopeptide-like helical (InterPro:IPR011990); BEST Arabidopsis thaliana protein match is: Tetratricopeptide repeat (TPR)-like superfamily protein (T…	Tetratricopeptide-like helical domain	YES	1:30141324:C-T;protein_coding;missense;GAA>AAA;E>K,1:30141997:C-T;protein_coding;missense;AGT>AAT;S>N,1:30141324:C-T;exonic_variant
AT1G80340	UP	gibberellin 3-oxidase 2	gibberellin 3-oxidase 2 (GA3OX2); CONTAINS InterPro DOMAIN/s: Oxoglutarate/iron-dependent oxygenase (InterPro:IPR005123); BEST Arabidopsis thaliana protein match is: gibberellin 3-oxidase 1 (TAIR:AT1G15550.1)	Isopenicillin N synthase-like | Non-haem dioxygenase N-terminal domain | Oxoglutarate/iron-dependent dioxygenase	YES	1:30201871:C-T;protein_coding;missense;CGG>CAG;R>Q
AT1G80440	DOWN	Galactose oxidase/kelch repeat superfamily protein	Galactose oxidase/kelch repeat superfamily protein; CONTAINS InterPro DOMAIN/s: Galactose oxidase/kelch, beta-propeller (InterPro:IPR011043), Kelch repeat type 1 (InterPro:IPR006652), Kelch related (InterPro:IPR013089), Kelch-type beta propeller (InterPro:IPR015915); BEST Arabidopsis thaliana protein match is: Galactose oxidase/kelch repeat superfamily protein (TAIR:AT1G15670.1)	F-box domain | Galactose oxidase, beta-propeller | Kelch repeat type 1	NO
AT1G80840	UP	WRKY DNA-binding protein 40	WRKY DNA-binding protein 40 (WRKY40); CONTAINS InterPro DOMAIN/s: DNA-binding WRKY (InterPro:IPR003657); BEST Arabidopsis thaliana protein match is: WRKY DNA-binding protein 18 (TAIR:AT4G31800.2)	DNA-binding WRKY	NO
AT2G01150	UP	RING-H2 finger protein 2B	RING-H2 finger protein 2B (RHA2B); CONTAINS InterPro DOMAIN/s: Zinc finger, RING-type (InterPro:IPR001841), Zinc finger, C3HC4 RING-type (InterPro:IPR018957); BEST Arabidopsis thaliana protein match is: RING-H2 finger A2A (TAIR:AT1G15100.1)		NO
AT2G01190	DOWN	Octicosapeptide/Phox/Bem1p family protein	Octicosapeptide/Phox/Bem1p family protein; LOCATED IN: cytosol, nucleus; EXPRESSED IN: 23 plant structures; EXPRESSED DURING: 13 growth stages; CONTAINS InterPro DOMAIN/s: Octicosapeptide/Phox/Bem1p (InterPro:IPR000270); BEST Arabidopsis thaliana protein match is: Octicosapeptide/Phox/Bem1p family protein (TAIR:AT3G18230.1)	Phox/Bem1p	NO
AT2G01220	DOWN	Nucleotidylyl transferase superfamily protein	Nucleotidylyl transferase superfamily protein; FUNCTIONS IN: nucleotidyltransferase activity; INVOLVED IN: biosynthetic process; LOCATED IN: chloroplast envelope; EXPRESSED IN: 23 plant structures; EXPRESSED DURING: 13 growth stages; CONTAINS InterPro DOMAIN/s: Rossmann-like alpha/beta/alpha sandwich fold (InterPro:IPR014729), Cytidylyltransferase (InterPro:IPR004820); BEST Arabidopsis thaliana p…	Cytidyltransferase-like domain | Rossmann-like alpha/beta/alpha sandwich fold	NO
AT2G01422	UP				NO
AT2G01520	UP	MLP-like protein 328	MLP-like protein 328 (MLP328); FUNCTIONS IN: copper ion binding; INVOLVED IN: response to zinc ion; LOCATED IN: cellular_component unknown; EXPRESSED IN: 13 plant structures; EXPRESSED DURING: 7 growth stages; CONTAINS InterPro DOMAIN/s: Bet v I allergen (InterPro:IPR000916); BEST Arabidopsis thaliana protein match is: Polyketide cyclase/dehydrase and lipid transport superfamily protein (TAIR:AT4…	Bet v I domain | Major latex protein domain | START-like domain	NO
AT2G01850	DOWN	endoxyloglucan transferase A3	endoxyloglucan transferase A3 (EXGT-A3); FUNCTIONS IN: hydrolase activity, acting on glycosyl bonds, xyloglucan:xyloglucosyl transferase activity; INVOLVED IN: phloem or xylem histogenesis; LOCATED IN: endomembrane system, cell wall, apoplast; EXPRESSED IN: 25 plant structures; EXPRESSED DURING: 13 growth stages; CONTAINS InterPro DOMAIN/s: Xyloglucan endotransglucosylase/hydrolase (InterPro:IPR0…	Concanavalin A-like lectin/glucanase, subgroup | Concanavalin A-like lectin/glucanases superfamily | Glycoside hydrolase, family 16 | Xyloglucan endo-transglycosylase, C-terminal | Xyloglucan endotransglucosylase/hydrolase	NO
AT2G01890	UP	purple acid phosphatase 8	purple acid phosphatase 8 (PAP8); FUNCTIONS IN: protein serine/threonine phosphatase activity, acid phosphatase activity; INVOLVED IN: dephosphorylation; LOCATED IN: endomembrane system; EXPRESSED IN: 22 plant structures; EXPRESSED DURING: 12 growth stages; CONTAINS InterPro DOMAIN/s: Metallophosphoesterase (InterPro:IPR004843); BEST Arabidopsis thaliana protein match is: purple acid phosphatase …	Acid phosphatase, type 5 | Calcineurin-like phosphoesterase domain, apaH type | Metallo-dependent phosphatase-like	NO
AT2G02010	UP	glutamate decarboxylase 4	glutamate decarboxylase 4 (GAD4); FUNCTIONS IN: calmodulin binding; INVOLVED IN: carboxylic acid metabolic process, glutamate metabolic process, glutamate decarboxylation to succinate; LOCATED IN: cytosol, nucleus; CONTAINS InterPro DOMAIN/s: Pyridoxal phosphate-dependent transferase, major domain (InterPro:IPR015424), Pyridoxal phosphate-dependent decarboxylase (InterPro:IPR002129), Glutamate de…		NO
AT2G02070	DOWN	indeterminate(ID)-domain 5	indeterminate(ID)-domain 5 (IDD5); FUNCTIONS IN: sequence-specific DNA binding transcription factor activity, zinc ion binding, nucleic acid binding; INVOLVED IN: regulation of transcription; LOCATED IN: intracellular, chloroplast; EXPRESSED IN: 22 plant structures; EXPRESSED DURING: 13 growth stages; CONTAINS InterPro DOMAIN/s: Zinc finger, C2H2-like (InterPro:IPR015880), Zinc finger, C2H2-type …	Zinc finger C2H2-type/integrase DNA-binding domain | Zinc finger, C2H2 | Zinc finger, C2H2-like	NO
AT2G02130	UP	low-molecular-weight cysteine-rich 68	low-molecular-weight cysteine-rich 68 (LCR68); FUNCTIONS IN: peptidase inhibitor activity; INVOLVED IN: defense response; LOCATED IN: endomembrane system; EXPRESSED IN: 22 plant structures; EXPRESSED DURING: 13 growth stages; CONTAINS InterPro DOMAIN/s: Gamma thionin (InterPro:IPR008176), Knottin (InterPro:IPR003614), Gamma Purothionin (InterPro:IPR008177); BEST Arabidopsis thaliana protein match…	Gamma Purothionin | Gamma thionin | Knottin, scorpion toxin-like	NO
AT2G02710	DOWN	PAS/LOV protein B	PAS/LOV PROTEIN A (PLPA); PAS/LOV PROTEIN C (PLPC); PAS/LOV protein B (PLPB); FUNCTIONS IN: two-component sensor activity, signal transducer activity; INVOLVED IN: signal transduction, regulation of transcription, DNA-dependent, two-component signal transduction system (phosphorelay); LOCATED IN: cellular_component unknown; EXPRESSED IN: 24 plant structures; EXPRESSED DURING: 14 growth stages; CO…	PAC motif | PAS domain | PAS-associated, C-terminal	NO
AT2G02930	UP	glutathione S-transferase F3	glutathione S-transferase F3 (GSTF3); FUNCTIONS IN: glutathione transferase activity; INVOLVED IN: toxin catabolic process; LOCATED IN: plasma membrane, cytoplasm; EXPRESSED IN: phloem, leaf; CONTAINS InterPro DOMAIN/s: Thioredoxin fold (InterPro:IPR012335), Glutathione S-transferase, C-terminal (InterPro:IPR004046), Glutathione S-transferase, C-terminal-like (InterPro:IPR010987), Glutathione S-t…	Glutathione S-transferase, C-terminal | Glutathione S-transferase, C-terminal-like | Glutathione S-transferase, N-terminal | Thioredoxin-like fold	NO
AT2G02950	DOWN	phytochrome kinase substrate 1	phytochrome kinase substrate 1 (PKS1); BEST Arabidopsis thaliana protein match is: phytochrome kinase substrate 2 (TAIR:AT1G14280.1)		NO
AT2G03090	UP	expansin A15	expansin A15 (EXPA15); INVOLVED IN: plant-type cell wall modification involved in multidimensional cell growth, syncytium formation, unidimensional cell growth, plant-type cell wall loosening; LOCATED IN: endomembrane system, extracellular region; EXPRESSED IN: 25 plant structures; EXPRESSED DURING: 13 growth stages; CONTAINS InterPro DOMAIN/s: Pollen allergen, N-terminal (InterPro:IPR014734), Ra…	Barwin-like endoglucanase | Expansin | Expansin, cellulose-binding-like domain | Expansin/Lol pI | Expansin/pollen allergen, DPBB domain | RlpA-like double-psi beta-barrel domain	NO
AT2G03240	DOWN	EXS (ERD1/XPR1/SYG1) family protein	EXS (ERD1/XPR1/SYG1) family protein; LOCATED IN: integral to membrane; EXPRESSED IN: 18 plant structures; EXPRESSED DURING: 10 growth stages; CONTAINS InterPro DOMAIN/s: SPX, N-terminal (InterPro:IPR004331), EXS, C-terminal (InterPro:IPR004342); BEST Arabidopsis thaliana protein match is: EXS (ERD1/XPR1/SYG1) family protein (TAIR:AT1G14040.1)	EXS, C-terminal | SPX, N-terminal	NO
AT2G03310	DOWN		unknown protein		NO
AT2G03550	DOWN	alpha/beta-Hydrolases superfamily protein	alpha/beta-Hydrolases superfamily protein; FUNCTIONS IN: hydrolase activity; INVOLVED IN: metabolic process; LOCATED IN: cellular_component unknown; EXPRESSED IN: 21 plant structures; EXPRESSED DURING: 13 growth stages; CONTAINS InterPro DOMAIN/s: Alpha/beta hydrolase fold-3 (InterPro:IPR013094); BEST Arabidopsis thaliana protein match is: carboxyesterase 13 (TAIR:AT3G48700.1)	Alpha/Beta hydrolase fold | Alpha/beta hydrolase fold-3	NO
AT2G03640	DOWN	Nuclear transport factor 2 (NTF2) family protein with RNA binding (RRM-RBD-RNP motifs) domain	Nuclear transport factor 2 (NTF2) family protein with RNA binding (RRM-RBD-RNP motifs) domain; FUNCTIONS IN: RNA binding, nucleotide binding, nucleic acid binding; INVOLVED IN: transport, nucleocytoplasmic transport; LOCATED IN: intracellular; CONTAINS InterPro DOMAIN/s: Nuclear transport factor 2 (InterPro:IPR002075), Nuclear transport factor 2, Eukaryote (InterPro:IPR018222), RNA recognition mo…	Nuclear transport factor 2 | Nuclear transport factor 2, eukaryote | Nucleotide-binding, alpha-beta plait | RNA recognition motif domain	NO
AT2G04080	UP	MATE efflux family protein	MATE efflux family protein; FUNCTIONS IN: antiporter activity, drug transmembrane transporter activity, transporter activity; INVOLVED IN: drug transmembrane transport, transmembrane transport; LOCATED IN: membrane; CONTAINS InterPro DOMAIN/s: MATE family transporter related protein (InterPro:IPR015521), Multi antimicrobial extrusion protein MatE (InterPro:IPR002528); BEST Arabidopsis thaliana pr…	Multi antimicrobial extrusion protein	NO
AT2G04160	DOWN	Subtilisin-like serine endopeptidase family protein	AUXIN-INDUCED IN ROOT CULTURES 3 (AIR3); FUNCTIONS IN: serine-type endopeptidase activity; INVOLVED IN: proteolysis, response to auxin stimulus, lateral root morphogenesis; LOCATED IN: endomembrane system; EXPRESSED IN: 17 plant structures; EXPRESSED DURING: 11 growth stages; CONTAINS InterPro DOMAIN/s: Protease-associated PA (InterPro:IPR003137), Proteinase inhibitor, propeptide (InterPro:IPR009…	Peptidase S8, subtilisin, Ser-active site | Peptidase S8, subtilisin-related | Peptidase S8/S53 domain | Protease-associated domain, PA | Proteinase inhibitor I9	NO
AT2G04580	UP	transposable element gene	similar to unknown protein [Arabidopsis thaliana] (TAIR:AT2G22440.1); similar to 52O08_2 [Brassica rapa subsp. pekinensis] (GB:AAZ67547.1); contains InterPro domain Polynucleotidyl transferase, Ribonuclease H fold; (InterPro:IPR012337)		NO
AT2G05510	DOWN	Glycine-rich protein family	Glycine-rich protein family; FUNCTIONS IN: molecular_function unknown; INVOLVED IN: biological_process unknown; LOCATED IN: endomembrane system; CONTAINS InterPro DOMAIN/s: Glycine rich protein (InterPro:IPR010800); BEST Arabidopsis thaliana protein match is: GLYCINE RICH PROTEIN 9 (TAIR:AT2G05440.1); BEST Arabidopsis thaliana protein match is: GLYCINE RICH PROTEIN 9 (TAIR:AT2G05440.6)	Glycine rich protein	NO
AT2G05518	UP				NO
AT2G05950	DOWN	transposable element gene	similar to unknown protein [Arabidopsis thaliana] (TAIR:AT3G32050.1); similar to transposon-like ORF [Brassica rapa] (GB:BAA85462.1)	Probable transposase, Ptta/En/Spm, plant	YES	2:2296621:A-G;intronic_variant,2:2296614:A-T;intronic_variant,2:2296621:A-G;exonic_variant,2:2296614:A-T;exonic_variant
AT2G05995	DOWN	other RNA			NO
AT2G06002	DOWN	other RNA			NO
AT2G06850	DOWN	xyloglucan endotransglucosylase/hydrolase 4	xyloglucan endotransglucosylase/hydrolase 4 (XTH4); FUNCTIONS IN: hydrolase activity, acting on glycosyl bonds, xyloglucan:xyloglucosyl transferase activity; INVOLVED IN: response to auxin stimulus, response to mechanical stimulus, response to low light intensity stimulus, unidimensional cell growth; LOCATED IN: in 6 components; EXPRESSED IN: 24 plant structures; EXPRESSED DURING: 15 growth stage…	Beta-glucanase | Concanavalin A-like lectin/glucanase, subgroup | Concanavalin A-like lectin/glucanases superfamily | Glycoside hydrolase, family 16 | Glycoside hydrolase, family 16, active site | Xyloglucan endo-transglycosylase, C-terminal | Xyloglucan endotransglucosylase/hydrolase	NO
AT2G06890	UP	transposable element gene	gypsy-like retrotransposon family, has a 7.3e-184 P-value blast match to GB:AAD22153 polyprotein (Gypsy_Ty3-element) (Sorghum bicolor)		NO
AT2G07777	DOWN	ATP synthase 9 mitochondrial	ATP synthase 9 mitochondrial; BEST Arabidopsis thaliana protein match is: ATP synthase 9 mitochondrial (TAIR:ATMG01090.1)		NO
AT2G13431	UP	other RNA			NO
AT2G13547	UP		unknown protein		NO
AT2G14878	UP				NO
AT2G15090	DOWN	3-ketoacyl-CoA synthase 8	3-ketoacyl-CoA synthase 8 (KCS8); FUNCTIONS IN: transferase activity, transferring acyl groups other than amino-acyl groups, catalytic activity, acyltransferase activity; INVOLVED IN: fatty acid elongation, very long-chain fatty acid metabolic process, response to osmotic stress; LOCATED IN: endoplasmic reticulum; EXPRESSED IN: 23 plant structures; EXPRESSED DURING: 13 growth stages; CONTAINS Int…	3-Oxoacyl-[acyl-carrier-protein (ACP)] synthase III C-terminal | FAE1/Type III polyketide synthase-like protein | Thiolase-like | Thiolase-like, subgroup | Very-long-chain 3-ketoacyl-CoA synthase	NO
AT2G15555	UP	other RNA			NO
AT2G15880	DOWN	Leucine-rich repeat (LRR) family protein	Leucine-rich repeat (LRR) family protein; FUNCTIONS IN: structural constituent of cell wall; LOCATED IN: endomembrane system; EXPRESSED IN: 15 plant structures; EXPRESSED DURING: 8 growth stages; CONTAINS InterPro DOMAIN/s: Leucine-rich repeat (InterPro:IPR001611); BEST Arabidopsis thaliana protein match is: Leucine-rich repeat (LRR) family protein (TAIR:AT4G33970.1)	Leucine-rich repeat	NO
AT2G15890	DOWN	maternal effect embryo arrest 14	maternal effect embryo arrest 14 (MEE14); FUNCTIONS IN: molecular_function unknown; INVOLVED IN: defense response to fungus, embryo development ending in seed dormancy; LOCATED IN: chloroplast; EXPRESSED IN: 22 plant structures; EXPRESSED DURING: 13 growth stages		NO
AT2G16140	UP	transposable element gene	similar to DNA binding [Arabidopsis thaliana] (TAIR:AT3G47680.1); similar to hypothetical protein 24.t00018 [Brassica oleracea] (GB:ABD64940.1); contains InterPro domain Homeodomain-like; (InterPro:IPR009057)	No apical meristem-associated, C-terminal domain	YES	2:7007838:C-CT;exonic_variant,2:7005448:A-G;exonic_variant,2:7007427:A-G;intronic_variant,2:7007427:A-G;exonic_variant,2:7005387:T-C;exonic_variant,2:7007835:C-T;intronic_variant,2:7007838:C-CT;intronic_variant,2:7007835:C-T;exonic_variant
AT2G16890	UP	UDP-Glycosyltransferase superfamily protein	UDP-Glycosyltransferase superfamily protein; FUNCTIONS IN: transferase activity, transferring hexosyl groups, UDP-glycosyltransferase activity, transferase activity, transferring glycosyl groups; INVOLVED IN: metabolic process; LOCATED IN: endomembrane system; EXPRESSED IN: 17 plant structures; EXPRESSED DURING: 7 growth stages; CONTAINS InterPro DOMAIN/s: UDP-glucuronosyl/UDP-glucosyltransferase…	Tudor domain | UDP-glucuronosyl/UDP-glucosyltransferase	NO
AT2G17230	DOWN	EXORDIUM like 5	EXORDIUM like 5 (EXL5); FUNCTIONS IN: molecular_function unknown; INVOLVED IN: biological_process unknown; LOCATED IN: endomembrane system; EXPRESSED IN: 22 plant structures; EXPRESSED DURING: 13 growth stages; CONTAINS InterPro DOMAIN/s: Phosphate-induced protein 1 (InterPro:IPR006766); BEST Arabidopsis thaliana protein match is: EXORDIUM like 1 (TAIR:AT2G35150.1)	Phosphate-induced protein 1	NO
AT2G17880	UP	Chaperone DnaJ-domain superfamily protein	Chaperone DnaJ-domain superfamily protein; FUNCTIONS IN: heat shock protein binding; INVOLVED IN: protein folding; LOCATED IN: chloroplast; EXPRESSED IN: 18 plant structures; EXPRESSED DURING: 11 growth stages; CONTAINS InterPro DOMAIN/s: Molecular chaperone, heat shock protein, Hsp40, DnaJ (InterPro:IPR015609), Heat shock protein DnaJ, N-terminal (InterPro:IPR001623); BEST Arabidopsis thaliana p…	DnaJ domain	NO
AT2G18230	UP	pyrophosphorylase 2	pyrophosphorylase 2 (PPa2); FUNCTIONS IN: inorganic diphosphatase activity, pyrophosphatase activity; INVOLVED IN: phosphate metabolic process, metabolic process; LOCATED IN: membrane, cytoplasm; EXPRESSED IN: 22 plant structures; EXPRESSED DURING: 14 growth stages; CONTAINS InterPro DOMAIN/s: Inorganic pyrophosphatase (InterPro:IPR008162); BEST Arabidopsis thaliana protein match is: pyrophosphor…	Inorganic pyrophosphatase	NO
AT2G18260	DOWN	syntaxin of plants 112	syntaxin of plants 112 (SYP112); FUNCTIONS IN: SNAP receptor activity; INVOLVED IN: intracellular protein transport, response to cold, cellular membrane fusion; LOCATED IN: nucleus; EXPRESSED IN: sperm cell, flower; EXPRESSED DURING: petal differentiation and expansion stage; CONTAINS InterPro DOMAIN/s: Target SNARE coiled-coil domain (InterPro:IPR000727), t-SNARE (InterPro:IPR010989), Syntaxin/e…	Syntaxin, N-terminal domain | Syntaxin/epimorphin, conserved site | Target SNARE coiled-coil domain | t-SNARE	NO
AT2G18280	DOWN	tubby like protein 2	tubby like protein 2 (TLP2); CONTAINS InterPro DOMAIN/s: F-box domain, cyclin-like (InterPro:IPR001810), Tubby, C-terminal, conserved site (InterPro:IPR018066), Tubby, C-terminal (InterPro:IPR000007); BEST Arabidopsis thaliana protein match is: tubby like protein 3 (TAIR:AT2G47900.3)	F-box domain | Tubby C-terminal-like domain | Tubby, C-terminal | Tubby, C-terminal, conserved site	NO
AT2G18450	UP	succinate dehydrogenase 1-2	succinate dehydrogenase 1-2 (SDH1-2); CONTAINS InterPro DOMAIN/s: Succinate dehydrogenase, flavoprotein subunit (InterPro:IPR011281), Fumarate reductase/succinate dehydrogenase, FAD-binding site (InterPro:IPR003952), Fumarate reductase/succinate dehydrogenase flavoprotein-like, C-terminal (InterPro:IPR015939), Fumarate reductase/succinate dehydrogenase flavoprotein, N-terminal (InterPro:IPR003953…	FAD binding domain | Fumarate reductase/succinate dehydrogenase flavoprotein-like, C-terminal | Fumarate reductase/succinate dehydrogenase, FAD-binding site | Succinate dehydrogenase, flavoprotein subunit | Succinate dehydrogenase/fumarate reductase flavoprotein, catalytic domain | Succinate dehydrogenase/fumarate reductase, flavoprotein subunit	NO
AT2G18690	UP		unknown protein; FUNCTIONS IN: molecular_function unknown; INVOLVED IN: biological_process unknown; LOCATED IN: membrane; EXPRESSED IN: 16 plant structures; EXPRESSED IN: 17 plant structures; EXPRESSED DURING: 9 growth stages; CONTAINS InterPro DOMAIN/s: Protein of unknown function DUF975 (InterPro:IPR010380); BEST Arabidopsis thaliana protein match is: unknown protein (TAIR:AT2G18680.1)	Protein of unknown function DUF975	NO
AT2G18700	DOWN	trehalose phosphatase/synthase 11	trehalose phosphatase/synthase 11 (TPS11); FUNCTIONS IN: transferase activity, transferring glycosyl groups; INVOLVED IN: trehalose biosynthetic process, metabolic process; LOCATED IN: mitochondrion; EXPRESSED IN: 27 plant structures; EXPRESSED DURING: 15 growth stages; CONTAINS InterPro DOMAIN/s: HAD-superfamily hydrolase, subfamily IIB (InterPro:IPR006379), Glycosyl transferase, family 20 (Inte…	Glycosyl transferase, family 20 | HAD-like domain | HAD-superfamily hydrolase, subfamily IIB | Trehalose-phosphatase	NO
AT2G20835	DOWN		unknown protein; BEST Arabidopsis thaliana protein match is: unknown protein (TAIR:AT3G15534.1)		NO
AT2G21210	DOWN	SAUR-like auxin-responsive protein family	SAUR-like auxin-responsive protein family ; CONTAINS InterPro DOMAIN/s: Auxin responsive SAUR protein (InterPro:IPR003676); BEST Arabidopsis thaliana protein match is: SAUR-like auxin-responsive protein family (TAIR:AT4G38840.1)		NO
AT2G21970	UP	stress enhanced protein 2	stress enhanced protein 2 (SEP2)		NO
AT2G22122	DOWN		unknown protein		NO
AT2G22680	DOWN	Zinc finger (C3HC4-type RING finger) family protein	Zinc finger (C3HC4-type RING finger) family protein; FUNCTIONS IN: ubiquitin-protein ligase activity, zinc ion binding; EXPRESSED IN: 13 plant structures; EXPRESSED DURING: 6 growth stages; CONTAINS InterPro DOMAIN/s: Zinc finger, RING-type (InterPro:IPR001841), Zinc finger, C3HC4 RING-type (InterPro:IPR018957), von Willebrand factor, type A (InterPro:IPR002035); BEST Arabidopsis thaliana protein…	Zinc finger, RING-type | Zinc finger, RING/FYVE/PHD-type | von Willebrand factor, type A	NO
AT2G22710	UP	transposable element gene	similar to DNA binding [Arabidopsis thaliana] (TAIR:AT4G01980.1); similar to hypothetical protein 26.t00020 [Brassica oleracea] (GB:ABD65000.1); contains InterPro domain Cyclin-like F-box; (InterPro:IPR001810); contains InterPro domain Homeodomain-related; (InterPro:IPR012287); contains InterPro domain Homeodomain-like; (InterPro:IPR009057); contains InterPro domain Myb, DNA-binding; (InterPro:IP…		NO
AT2G23130	DOWN	arabinogalactan protein 17	arabinogalactan protein 17 (AGP17); BEST Arabidopsis thaliana protein match is: arabinogalactan protein 18 (TAIR:AT4G37450.1)		NO
AT2G23290	DOWN	myb domain protein 70	myb domain protein 70 (MYB70); CONTAINS InterPro DOMAIN/s: SANT, DNA-binding (InterPro:IPR001005), Homeodomain-like (InterPro:IPR009057), Myb, DNA-binding (InterPro:IPR014778), HTH transcriptional regulator, Myb-type, DNA-binding (InterPro:IPR017930), Homeodomain-related (InterPro:IPR012287), Myb transcription factor (InterPro:IPR015495); BEST Arabidopsis thaliana protein match is: myb domain pro…	Homeodomain-like | Myb domain | SANT/Myb domain	NO
AT2G23320	UP	WRKY DNA-binding protein 15	WRKY DNA-binding protein 15 (WRKY15); CONTAINS InterPro DOMAIN/s: DNA-binding WRKY (InterPro:IPR003657), Transcription factor, WRKY, Zn-cluster (InterPro:IPR018872); BEST Arabidopsis thaliana protein match is: WRKY DNA-binding protein 11 (TAIR:AT4G31550.1)	DNA-binding WRKY | Zn-cluster domain	NO
AT2G23790	UP	Protein of unknown function (DUF607)	Protein of unknown function (DUF607); CONTAINS InterPro DOMAIN/s: Protein of unknown function DUF607 (InterPro:IPR006769); BEST Arabidopsis thaliana protein match is: Protein of unknown function (DUF607) (TAIR:AT4G36820.1)	Coiled-coil domain containing protein 109, C-terminal	NO
AT2G24160	UP		pseudogene, leucine rich repeat protein family, contains leucine rich-repeat domains Pfam:PF00560, INTERPRO:IPR001611; contains some similarity to Cf-4 (Lycopersicon hirsutum) gi|2808683|emb|CAA05268; blastp match of 37% identity and 8.4e-98 P-value to GP|2808683|emb|CAA05268.1||AJ002235 Cf-4 {Lycopersicon hirsutum}	Leucine-rich repeat | Leucine-rich repeat-containing N-terminal, type 2	NO
AT2G24240	DOWN	BTB/POZ domain with WD40/YVTN repeat-like protein	BTB/POZ domain with WD40/YVTN repeat-like protein; FUNCTIONS IN: voltage-gated potassium channel activity; INVOLVED IN: potassium ion transport; LOCATED IN: voltage-gated potassium channel complex, membrane; EXPRESSED IN: 17 plant structures; EXPRESSED DURING: 11 growth stages; CONTAINS InterPro DOMAIN/s: WD40 repeat-like-containing domain (InterPro:IPR011046), BTB/POZ fold (InterPro:IPR011333), …	BTB/POZ fold | BTB/POZ-like | Potassium channel tetramerisation-type BTB domain | WD40-repeat-containing domain | WD40/YVTN repeat-like-containing domain	NO
AT2G24600	UP	Ankyrin repeat family protein	Ankyrin repeat family protein; INVOLVED IN: biological_process unknown; LOCATED IN: cellular_component unknown; EXPRESSED IN: 19 plant structures; EXPRESSED DURING: 12 growth stages; CONTAINS InterPro DOMAIN/s: Ankyrin repeat-containing domain (InterPro:IPR020683), Ankyrin repeat (InterPro:IPR002110); BEST Arabidopsis thaliana protein match is: Ankyrin repeat family protein (TAIR:AT1G10340.1)	Ankyrin repeat | Ankyrin repeat-containing domain | Caskin/Ankyrin repeat-containing protein | PGG domain	NO
AT2G25090	DOWN	CBL-interacting protein kinase 16	CBL-interacting protein kinase 16 (CIPK16); FUNCTIONS IN: protein serine/threonine kinase activity, protein kinase activity, kinase activity, ATP binding; INVOLVED IN: signal transduction, protein amino acid phosphorylation; EXPRESSED IN: stem, root, stamen; EXPRESSED DURING: 4 anthesis; CONTAINS InterPro DOMAIN/s: Protein kinase, ATP binding site (InterPro:IPR017441), Serine/threonine-protein ki…	Calcium/calmodulin-dependent/calcium-dependent protein kinase | NAF domain | NAF/FISL domain | Protein kinase domain | Protein kinase, ATP binding site | Protein kinase-like domain | Serine/threonine-protein kinase, active site | Serine/threonine/dual specificity protein kinase, catalytic domain	NO
AT2G25200	DOWN	Plant protein of unknown function (DUF868)	Plant protein of unknown function (DUF868); CONTAINS InterPro DOMAIN/s: Protein of unknown function DUF868, plant (InterPro:IPR008586); BEST Arabidopsis thaliana protein match is: Plant protein of unknown function (DUF868) (TAIR:AT5G11000.1)	Protein of unknown function DUF868, plant	NO
AT2G25430	DOWN	epsin N-terminal homology (ENTH) domain-containing protein / clathrin assembly protein-related	epsin N-terminal homology (ENTH) domain-containing protein / clathrin assembly protein-related; FUNCTIONS IN: phospholipid binding, clathrin binding, binding, phosphatidylinositol binding; INVOLVED IN: clathrin coat assembly; LOCATED IN: nucleus, plasma membrane; EXPRESSED IN: 23 plant structures; EXPRESSED DURING: 13 growth stages; CONTAINS InterPro DOMAIN/s: Epsin-like, N-terminal (InterPro:IPR…	AP180 N-terminal homology (ANTH) domain | Clathrin adaptor, phosphoinositide-binding, GAT-like | ENTH/VHS | Epsin-like, N-terminal	NO
AT2G25510	UP		unknown protein; FUNCTIONS IN: molecular_function unknown; INVOLVED IN: biological_process unknown; LOCATED IN: endomembrane system; EXPRESSED IN: 22 plant structures; EXPRESSED DURING: 13 growth stages; BEST Arabidopsis thaliana protein match is: unknown protein (TAIR:AT5G42530.1)		NO
AT2G25625	UP		unknown protein; FUNCTIONS IN: molecular_function unknown; INVOLVED IN: biological_process unknown; LOCATED IN: chloroplast; EXPRESSED IN: 10 plant structures; EXPRESSED DURING: LP.06 six leaves visible, LP.04 four leaves visible, 4 anthesis, petal differentiation and expansion stage		NO
AT2G25735	UP		unknown protein		NO
AT2G25770	DOWN	Polyketide cyclase/dehydrase and lipid transport superfamily protein	Polyketide cyclase/dehydrase and lipid transport superfamily protein; CONTAINS InterPro DOMAIN/s: Polyketide cyclase/dehydrase (InterPro:IPR019587); BEST Arabidopsis thaliana protein match is: Polyketide cyclase/dehydrase and lipid transport superfamily protein (TAIR:AT4G32870.1)	Polyketide cyclase/dehydrase | START-like domain	NO
AT2G25780	DOWN	Protein of unknown function (DUF1677)	Protein of unknown function (DUF1677); CONTAINS InterPro DOMAIN/s: Protein of unknown function DUF1677, plant (InterPro:IPR012876); BEST Arabidopsis thaliana protein match is: Protein of unknown function (DUF1677) (TAIR:AT1G79770.1)	Protein of unknown function DUF1677, plant	NO
AT2G25800	DOWN	Protein of unknown function (DUF810)	CONTAINS InterPro DOMAIN/s: Munc13 homology 1 (InterPro:IPR014770), Protein of unknown function DUF810 (InterPro:IPR008528), Mammalian uncoordinated homology 13, domain 2 (InterPro:IPR014772); BEST Arabidopsis thaliana protein match is: Protein of unknown function (DUF810) (TAIR:AT2G20010.2)	Mammalian uncoordinated homology 13, domain 2 | Munc13 homology 1 | Protein of unknown function DUF810	NO
AT2G26360	UP	Mitochondrial substrate carrier family protein	Mitochondrial substrate carrier family protein; FUNCTIONS IN: binding; INVOLVED IN: transport, mitochondrial transport, transmembrane transport; LOCATED IN: mitochondrial inner membrane, membrane; EXPRESSED IN: 23 plant structures; EXPRESSED DURING: 13 growth stages; CONTAINS InterPro DOMAIN/s: Mitochondrial carrier protein (InterPro:IPR002067), Mitochondrial substrate carrier (InterPro:IPR001993…	Mitochondrial carrier domain | Mitochondrial carrier protein | Mitochondrial substrate/solute carrier	NO
AT2G26440	UP	Plant invertase/pectin methylesterase inhibitor superfamily	Plant invertase/pectin methylesterase inhibitor superfamily; FUNCTIONS IN: enzyme inhibitor activity, pectinesterase activity; INVOLVED IN: cell wall modification; LOCATED IN: endomembrane system, cell wall, plant-type cell wall; EXPRESSED IN: 20 plant structures; EXPRESSED DURING: 13 growth stages; CONTAINS InterPro DOMAIN/s: Pectinesterase, active site (InterPro:IPR018040), Pectin lyase fold/vi…	Pectin lyase fold | Pectin lyase fold/virulence factor | Pectinesterase inhibitor domain | Pectinesterase, active site | Pectinesterase, catalytic	NO
AT2G26630	DOWN	transposable element gene	transposase IS4 family protein, contains Pfam profile: PF01609 transposase DDE domain	Transposase, IS4-like	NO
AT2G26980	DOWN	CBL-interacting protein kinase 3	CBL-interacting protein kinase 3 (CIPK3); CONTAINS InterPro DOMAIN/s: Protein kinase, ATP binding site (InterPro:IPR017441), Serine/threonine-protein kinase domain (InterPro:IPR002290), NAF/FISL domain (InterPro:IPR018451), Serine/threonine-protein kinase-like domain (InterPro:IPR017442), Protein kinase-like domain (InterPro:IPR011009), Serine/threonine-protein kinase, active site (InterPro:IPR00…	NAF domain | NAF/FISL domain | Protein kinase domain | Protein kinase, ATP binding site | Protein kinase-like domain | Serine/threonine-protein kinase, active site | Serine/threonine/dual specificity protein kinase, catalytic domain	NO
AT2G27402	UP		BEST Arabidopsis thaliana protein match is: plastid transcriptionally active 18 (TAIR:AT2G32180.1)		NO
AT2G27420	UP	Cysteine proteinases superfamily protein	Cysteine proteinases superfamily protein; FUNCTIONS IN: cysteine-type peptidase activity, cysteine-type endopeptidase activity; INVOLVED IN: proteolysis; LOCATED IN: endomembrane system; EXPRESSED IN: 15 plant structures; EXPRESSED DURING: 10 growth stages; CONTAINS InterPro DOMAIN/s: Peptidase C1A, papain (InterPro:IPR013128), Proteinase inhibitor I29, cathepsin propeptide (InterPro:IPR013201), …	Cysteine peptidase, asparagine active site | Cysteine peptidase, cysteine active site | Cysteine peptidase, histidine active site | Peptidase C1A | Peptidase C1A, papain C-terminal | Proteinase inhibitor I29, cathepsin propeptide	NO
AT2G27450	UP	nitrilase-like protein 1	nitrilase-like protein 1 (NLP1); CONTAINS InterPro DOMAIN/s: Nitrilase/cyanide hydratase and apolipoprotein N-acyltransferase (InterPro:IPR003010), N-carbamoylputrescine amidase (InterPro:IPR017755); BEST Arabidopsis thaliana protein match is: beta-ureidopropionase (TAIR:AT5G64370.1)	Carbon-nitrogen hydrolase | N-carbamoylputrescine amidase	NO
AT2G28110	DOWN	Exostosin family protein	FRAGILE FIBER 8 (FRA8); CONTAINS InterPro DOMAIN/s: Exostosin-like (InterPro:IPR004263); BEST Arabidopsis thaliana protein match is: FRA8 homolog (TAIR:AT5G22940.1)	Exostosin-like	NO
AT2G28120	DOWN	Major facilitator superfamily protein	Major facilitator superfamily protein; INVOLVED IN: N-terminal protein myristoylation, transmembrane transport; LOCATED IN: plasma membrane; EXPRESSED IN: 11 plant structures; EXPRESSED DURING: 6 growth stages; CONTAINS InterPro DOMAIN/s: Nodulin-like (InterPro:IPR010658), Major facilitator superfamily MFS-1 (InterPro:IPR011701), Major facilitator superfamily, general substrate transporter (Inter…	Major facilitator superfamily domain, general substrate transporter | Nodulin-like	NO
AT2G28190	DOWN	copper/zinc superoxide dismutase 2	copper/zinc superoxide dismutase 2 (CSD2); FUNCTIONS IN: superoxide dismutase activity; INVOLVED IN: in 6 processes; LOCATED IN: thylakoid, apoplast, chloroplast stroma, chloroplast; EXPRESSED IN: 29 plant structures; EXPRESSED DURING: 14 growth stages; CONTAINS InterPro DOMAIN/s: Superoxide dismutase, copper/zinc, binding site (InterPro:IPR018152), Superoxide dismutase, copper/zinc binding (Inte…		NO
AT2G28900	DOWN	outer plastid envelope protein 16-1	outer plastid envelope protein 16-1 (OEP16-1); FUNCTIONS IN: protein transporter activity, P-P-bond-hydrolysis-driven protein transmembrane transporter activity; INVOLVED IN: in 7 processes; LOCATED IN: chloroplast, plastid outer membrane, vacuole, chloroplast envelope; EXPRESSED IN: 22 plant structures; EXPRESSED DURING: 13 growth stages; CONTAINS InterPro DOMAIN/s: Mitochondrial inner membrane …	Mitochondrial inner membrane translocase subunit Tim17/Tim22/Tim23/peroxisomal protein PMP24	NO
AT2G29670	DOWN	Tetratricopeptide repeat (TPR)-like superfamily protein	Tetratricopeptide repeat (TPR)-like superfamily protein; FUNCTIONS IN: binding; LOCATED IN: chloroplast; EXPRESSED IN: 23 plant structures; EXPRESSED DURING: 15 growth stages; CONTAINS InterPro DOMAIN/s: Tetratricopeptide-like helical (InterPro:IPR011990), Tetratricopeptide repeat-containing (InterPro:IPR013026), Tetratricopeptide repeat (InterPro:IPR019734); BEST Arabidopsis thaliana protein mat…	Tetratricopeptide repeat | Tetratricopeptide repeat-containing domain | Tetratricopeptide-like helical domain	NO
AT2G29910	UP	F-box/RNI-like superfamily protein	F-box/RNI-like superfamily protein; CONTAINS InterPro DOMAIN/s: F-box domain, cyclin-like (InterPro:IPR001810), F-box domain, Skp2-like (InterPro:IPR022364), Leucine-rich repeat 2 (InterPro:IPR013101); BEST Arabidopsis thaliana protein match is: F-box/RNI-like superfamily protein (TAIR:AT2G29930.3)	F-box domain | Leucine-rich repeat 2	NO
AT2G31230	UP	ethylene-responsive element binding factor 15	ethylene-responsive element binding factor 15 (ERF15); FUNCTIONS IN: DNA binding, transcription activator activity, sequence-specific DNA binding transcription factor activity; INVOLVED IN: ethylene mediated signaling pathway, regulation of transcription, DNA-dependent, response to chitin; LOCATED IN: chloroplast; EXPRESSED IN: stem, root; CONTAINS InterPro DOMAIN/s: DNA-binding, integrase-type (…	AP2/ERF domain | DNA-binding domain	NO
AT2G31380	DOWN	salt tolerance homologue	salt tolerance homologue (STH); FUNCTIONS IN: sequence-specific DNA binding transcription factor activity, zinc ion binding, protein domain specific binding; INVOLVED IN: regulation of transcription; LOCATED IN: endomembrane system, intracellular; EXPRESSED IN: 21 plant structures; EXPRESSED DURING: 12 growth stages; CONTAINS InterPro DOMAIN/s: Zinc finger, B-box (InterPro:IPR000315); BEST Arabid…	Zinc finger, B-box	YES	2:13382874:G-A;protein_coding;missense;AGT>AAT;S>N
AT2G32150	DOWN	Haloacid dehalogenase-like hydrolase (HAD) superfamily protein	Haloacid dehalogenase-like hydrolase (HAD) superfamily protein; FUNCTIONS IN: hydrolase activity, catalytic activity; INVOLVED IN: metabolic process; LOCATED IN: cellular_component unknown; EXPRESSED IN: 24 plant structures; EXPRESSED DURING: 13 growth stages; CONTAINS InterPro DOMAIN/s: Haloacid dehalogenase-like hydrolase (InterPro:IPR005834), Pyrimidine 5-nucleotidase (InterPro:IPR010237), HAD…	HAD-like domain | Pyrimidine 5-nucleotidase	NO
AT2G32290	UP	beta-amylase 6	beta-amylase 6 (BAM6); FUNCTIONS IN: cation binding, beta-amylase activity, catalytic activity; INVOLVED IN: cellulose biosynthetic process, carbohydrate metabolic process, polysaccharide catabolic process; LOCATED IN: chloroplast; EXPRESSED IN: 14 plant structures; EXPRESSED DURING: 8 growth stages; CONTAINS InterPro DOMAIN/s: Glycoside hydrolase, family 14, conserved site (InterPro:IPR018238), …	Glycoside hydrolase, catalytic domain | Glycoside hydrolase, family 14 | Glycoside hydrolase, family 14, conserved site | Glycoside hydrolase, family 14B, plant | Glycoside hydrolase, superfamily	NO
AT2G32450	DOWN	Calcium-binding tetratricopeptide family protein	Calcium-binding tetratricopeptide family protein; FUNCTIONS IN: binding, zinc ion binding, calcium ion binding; LOCATED IN: plasma membrane; EXPRESSED IN: 23 plant structures; EXPRESSED DURING: 14 growth stages; CONTAINS InterPro DOMAIN/s: Tetratricopeptide TPR-1 (InterPro:IPR001440), Tetratricopeptide-like helical (InterPro:IPR011990), EF-HAND 2 (InterPro:IPR018249), Zinc finger, ZZ-type (InterP…	EF-hand domain | EF-hand domain pair | Tetratricopeptide TPR2 | Tetratricopeptide repeat | Tetratricopeptide repeat-containing domain | Tetratricopeptide-like helical domain | Zinc finger, ZZ-type	NO
[truncated: 604 more rows]

## Sheet: Koncz _Share
Gene ID	Category	Protein annotation
AT3G56070	U4/U6 snRNP	ROTAMASE CYCLOPHILIN 2 (ROC2)

## Sheet: GO_share_up_C
Term Name	GOID	Term Type	Depth	cnt(reference)	cnt(coilin_up)	fsh(coilin_up)
[truncated: 15 more rows]

[truncated: 5 more sheets: GO_share_up_F, GO_share_up_P, GO_share_down_C, GO_share_down_F, GO_share_down_P]
